# Supplementary material for: Direct or indirect recharge on groundwater in the middle-latitude desert of Otindag, China?
Source: Copernicus journal article supplement (doi:10.5194/hess-2018-71), 2018-03-15
Supplement: Supplementary file [file hess-2018-71-AC1-supplement.pdf]

### Comments from Referee #1

Interactive comment on “Direct or indirect recharge on groundwater in the middle-latitude desert of Otindag, China?” by Bing-Qi Zhu and Xiao-Zong Ren, Anonymous Referee #1, Received and published: 22 May 2018.

The manuscript describes interesting results about the recharge mechanisms of arid zones in China, especially considering the importance of the topic. Despite the multidisciplinary approach, which is very useful in groundwater recharge studies, there are many weak points which have to be improved for a publication in HESS. The main points are listed below: 1) The datasets belong to sampling campaigns carried out in different moments (years) and seasons and for this reason in my opinion cannot be discussed together, without a clear distinction between the different phases. 2) A reconstruction of the piezometric morphology as well as a stratigraphy of the considered study areas should be reported. This could help also the discussion of the groundwater preferential pathways. 3) The organization of the paper is still at a draft level, since there is not a clear distinction between the results and discussion paragraphs. Many paragraphs need to be summarized and better explained. 4) The number of figures should be reduced (probably putting together some and deleting others). 5) The English is very poor and there are many typo errors. The reported delta notation is wrong. Due to the consideration of these main points the manuscript can be accepted only if major revision will be reported.

Interactive comment on Hydrol. Earth Syst. Sci. Discuss., <https://doi.org/10.5194/hess-2018-71>, 2018.

### The authors' responses to the comments from Referee #1

Dear Dr/Professor Referee #1:

On behalf of my co-authors, we thank you very much for giving us an opportunity to revise our manuscript. We appreciate you very much for your positive and constructive comments and suggestions on our manuscript (hess-2018-71). We have studied your comments carefully and have made revision which marked in red in the revised manuscript. We tried our best to revise our manuscript according to the comments point by point. Attached please find the revised version, which we would like to submit for your kind consideration. Thank you and best regards.

1) The datasets belong to sampling campaigns carried out in different moments (years) and seasons and for this reason in my opinion cannot be discussed together, without a clear distinction between the different phases.

Our response: AGREE AND NO CHANGES MADE.

Firstly, we thank you very much for this comment from you and we truly agree this point that water samples collected in different moments (years) and seasons cannot be discussed together without a clear distinction between the different water phases. In fact, although we stated in the manuscript that our fieldwork had taken place during the summer season of 2011 and the spring season of 2012, we collected the natural water samples at the same time for the same phases in the study area. For example, (1) all the groundwater samples discussed in this paper were collected during the 2011 summer in five days in the Otindag Desert. For other natural water samples discussed in this study, the detailed sampling methods are as follow: (2) all the spring water samples and (3) the precipitation water sample (p1) discussed in this paper were also collected during the 2011 summer in five days in the study area, and (4) all the river water samples and (5) lake water samples were collected during the spring season of 2012 in three days in the study area. This is to say that the water samples within the same phase are discussed together in the paper.

2) A reconstruction of the piezometric morphology as well as a stratigraphy of the considered study areas should be reported. This could help also the discussion of the groundwater preferential pathways.

Our response: AGREE AND CHANGES MADE.

We thank you very much for this comment. And yes, according to this comment, we revised the

manuscript and focused on reporting the geological (tectonic, lithological, sedimentological and structural), geomorphological, hydrogeological and stratigraphical settings of the study area. Please see the section 2 “Regional setting” of the revised manuscript in its pages 2-4 lines 103-188.

3) The organization of the paper is still at a draft level, since there is not a clear distinction between the results and discussion paragraphs. Many paragraphs need to be summarized and better explained.

Our response: AGREE AND CHANGES MADE.

We thank you very much for this comment. And yes, we have revised the manuscript accordingly. The structure and content of the paper has been thoroughly reorganized in the revised manuscript, especially for the results and discussion sections, to make the content and context of the paper being more logic, coherent and readable. And yes, almost all of the paragraphs in the paper are newly summarized and explained. The detailed changes can be easily observed in the revised manuscript by reading one of the two resubmitted MS-Word files with the “changes marked” version (in contrast, another version is “clear copy”).

4) The number of figures should be reduced (probably putting together some and deleting others).

Our response: AGREE AND CHANGES MADE.

We thank you very much for this comment. And yes, we have revised the manuscript accordingly. We reduced the number of figures in the revised manuscript by putting some figures together and deleting several figures. At last the revised manuscript has 11 figures compared with the original manuscript that including 15 figures. For example, the Figs. 5, 11, 13, 14a in the original manuscript are deleted in the revised manuscript, and the Figs. 7 and 8, the Figs. 10, 12 and 14a are combined, respectively. In addition, two newly-built figures are added into the revised manuscript according to the second comment from you (the detailed content of this comment can be seen above). The specific changes and the final results of these figures can be seen in the newly submitted revised manuscript.

5) The English is very poor and there are many typo errors. The reported delta notation is wrong.

Our response: AGREE AND CHANGES MADE.

We thank you very much for this comment. We are very sorry for our poor and incorrect English writing in the original manuscript. For the shortcomings of the English presentation and the grammatical edit in the first paper, we have checked and revised the whole manuscript carefully to avoid language errors, and finally we have got the help of a native English speaking professional to check and improve the English quality of the revised manuscript. We believe that the language is now acceptable for the publishing purpose.

In addition, the wrong use of the dalta notation in the original manuscript, such as  $\delta^2\text{H}$ , has been corrected as “ $\delta\text{D}$ ” in the revised manuscript.

6) Due to the consideration of these main points the manuscript can be accepted only if major revision will be reported.

Our response: AGREE AND CHANGES MADE.

Special thanks to you for your good comments. We have tried our best to improve the manuscript and made specific changes in the revised manuscript according to the comments from you one by one. These changes will not influence the content and framework of the paper. And here we did not list the changes but marked in red in the revised paper. We hope that the correction will meet with approval. Once again, thank you very much for your comments and suggestions.

# Direct or indirect recharge on groundwater in the middle-latitude desert of Otindag, China?

Bing-Qi Zhu<sup>1\*</sup>, Xiao-Zong Ren<sup>2</sup>, Patrick Rioual<sup>3</sup>

<sup>1</sup>KLWCRES, IGSNRR, CAS, Beijing, China

<sup>2</sup>SGS, TYN, Jinzhong, China

<sup>3</sup>KLCGE, IGGCAS, Beijing, China

*Correspondence to:* Bing-Qi Zhu ([zhubingqi@sina.com](mailto:zhubingqi@sina.com))

**Abstract.** The Otindag Desert is essential to livestock-economy and ecoenvironment of northern China. Although surface water is the traditional source for China's socio-economy in arid areas, the groundwater resources underlying the desert are increasingly burdened by groundwater pumping, which increases interest in the status of the groundwater resources. Widespread fresh groundwater deep to 60 m was found at the eastern part of the Otindag Desert. The occurrence of this massive fresh groundwater raises doubts on the often-made assumption in the literature that regional atmospheric precipitation or palaeowater, namely the direct recharge, is the source of water in the middle-latitude desert aquifers of northern China and makes further investigation necessary. Knowledge on the origin and recharge of this fresh groundwater is key in assessing the possibility of groundwater exploitation and utilization. In this study we conducted hydrogeochemical and isotopical analyses to assess possible origin and recharge of these groundwaters. It is concluded that the fresh groundwater can neither originate from regional atmospheric precipitation derived from the Asian Summer Monsoon system, nor from palaeowater that formed during the last glacial period. Our results indicate that with groundwater dating it is possible to originate from remote mountain areas via the faults of the Solonker Suture zone, including the Daxing'anlin and Yinshan Mountains. Furthermore, it is deduced that the hydrological connection between desert aquifers and mountain systems through the suturezone is crucial to the hydrogeological functioning of the Otindag aquifer. This suggests that the modern indirect recharge mechanism, instead of the direct recharge and the palaeo-water recharge, is the most significant for groundwater recharge in the Otindag Desert. This study provides a new perspective into the origin and evolution of groundwater resources in the middle-latitude desert zone of Asian continent.

**Keywords:** fresh groundwater recharge; atmospheric precipitation; direct recharge; indirect recharge; palaeowater recharge; fault hydrology; middle-latitude desert; Otindag Desert.

## 1. Introduction

In a semi-arid to arid region where rainfall is insufficient to supply the needs of a growing population and a higher standard of living, the deficit is normally made up by extracting groundwater. Many areas in the middle-latitude desert zone of northern China such as the Badanjilin Desert, the Mu US sandy Land and the Hobq Desert (Chen et al., 2012a; Chen et al., 2012b), are unexpectedly rich

with large groundwater resources although they have been under arid or hyper-arid climate for a long time (Sun et al., 2010). How these groundwaters originated and how they are recharged in these deserts are thus fundamental scientific questions. Until now, however, no consensus has been achieved in academic circles.

The Otindag Desert is one of the largest sandy lands located at the monsoon margin of northern China and is the geographical centre of the northeastern Asian Continent (Fig. 1), which can be regarded as a significant repository of information relating to the groundwater recharge in the arid Inner Asia. At present, the eastern Otindag is also a typical case for its unexpected groundwater resources, because there is abundant groundwater in this desert land and even rivers originate there due to the spillover of spring water, such as the tributaries of Xilamulun River in its north and the Shandian River in its south (Fig. 1). Climatically, the monsoon margin of northern China refers to a strip along the present East Asian Summer Monsoon (EASM) limits and is considered to be sensitive to climate change (Wang and Feng, 2013). Geologically, the Otindag Desert lies in a tectonic depression of the central Solonker suture zone with a few faults stretching east and west (Fig. 2), with its northern margin along a fault marked by a series of lake basins. Thus, the large-scale hydrogeological conditions of the Otindag Desert belong to a fault zone under the influence of the EASM climate.

Until now, however, whether the climate or other factors affected the groundwater recharge in the Otindag are still not known. Little data about the groundwater and its origin is available in the literature, and knowledge and reliable data on various hydrogeological characteristics of the desert such as the catchment extent, input/output, the hysteretic hydraulic functions, the transient hydraulic conditions, in-homogeneities, and on transfer functions to overcome scale problems are also missing. Under such conditions, conventional methods such as water balance and hydraulic methods sometimes fail in determining groundwater recharge, particularly in extreme environments (arid, semi-arid, or cold) (Drever, 1997). Because pristine aquatic conditions may significantly differ from managed conditions in arid environment, and thus groundwater recharge is not a fixed number, but may vary with the boundary conditions of the recharge system (Seiler and Gat, 2007).

Groundwater recharge can be broadly classified into two categories: the direct recharge by native water resources and the indirect recharge by external water resources (Herczeg and Leaney, 2011). Water infiltration of atmospheric precipitation through the unsaturated zone to the groundwater is hydrologically defined as the direct recharge, and the indirect recharge is defined as recharge from mappable features such as rivers, canals, lakes and originates from remote areas (Scanlon et al., 2006; Healy, 2010). It is well known that groundwater recharge can be influenced by environmental factors, including climate change, underlying soil and geology, land cover and the growth in human population that affects withdrawal and economic development (Zhu et al., 2015, 2017). Among these environmental factors, climate and land cover largely determine precipitation and evapotranspiration, whereas the underlying soil and geology dictate whether a water surplus (precipitation minus evapotranspiration) can be transmitted and stored in the subsurface (Doll, 2008, 2009; Giordano, 2009).

For some earth scientists, the direct recharge is thought to be very important for groundwaters in the wide desert lands of north China due to the lack of surface runoffs (Yang et al., 2010; Yang and Williams, 2003; Zhao et al., 2017). They argued that although the amount of atmospheric precipitation

is small, the vast catchment area in the desert region could concentrate the rainfall into large inland basins, creating an aquifer with large storage capacity and great thickness. However, some hydrologists estimated by the chloride mass balance method that the direct recharge was 1.4 mm/year, which represents approximately only 1.7% of the mean annual precipitation in a cold large desert (Badanjilin) in northern China (Gates et al., 2008). A similar estimation of 1 mm/year was given for Gobi deserts from the Hexi Corridor to the Inner Mongolia Plateau in northwestern China (Ma et al., 2008). Consequently, they thought that heavy potential evaporation and little precipitation make it difficult for direct recharge to meet the supply of groundwater in these desert areas. Thus, the indirect recharge is considered to be an important mechanism for groundwater recharge in these desert areas. For example, Zhao et al. (2012) suggested that little precipitation had recharged into groundwaters in the Badain Jaran Desert. Chen et al. (2004) argued that the groundwaters in the Badanjilin Desert were recharged by palaeo-glacial melt water through faults and deep carbonate layers far away from the local desert. Many studies also suggested that palaeowaters stored in an aquifer during wetter climate periods could recharge to groundwater under certain conditions in arid lands (Edmunds et al., 2006; Ma and Edmunds, 2006). Other kinds of indirect recharge, such as mountain front recharge from adjacent mountain blocks, are also proposed to offer an important inflow to aquifers within arid to semiarid catchments (Blasch and Bryson, 2007).

In this paper, we focus to answer the question that whether groundwater recharge in Otindag is mainly direct or indirect, using hydrochemical and isotopic indicators as tracers to offer a valuable support for identifying the contributions of precipitation recharge on groundwater, since these indicators reflect the composition of water molecules and are sensitive to physical processes such as mixing and evaporation (Sultan et al., 2000; Guendouz et al., 2003; Petrides et al., 2006; Scanlon et al., 2006; Zhu et al., 2007, 2008; Jobbágy et al., 2011). The detailed objectives are: (1) to recognize the major sources of groundwater in the area, and (2) to identify the key mechanism of groundwater recharge in the desert.

## 2. Regional settings

**Geographic setting.** The Otindag Desert lies between latitudes 42° and 44°N and longitudes 112° and 118° E (Fig. 1). It forms a part of the great middle-latitude desert belt in northern China which stretches from the Taklamakan Desert of northwestern China to the Kelqin Desert of northeastern China, near the west coast of the Pacific Ocean. The desert has an area of approximately 21,400 square kilometers located in the eastern Inner Mongolia and at the monsoon margin of northern China (Fig. 1). It is the fourth largest sandy lands in China (Yang et al., 2012) and is bordered by a flat steppe terrain of Dali Basin to the north, the Yinshan Mountains and mountainous loess landscape to the south, and the the Greater Khingan (Daxing'Anling) Mountains to the east (Fig. 1). The Otindag Desert is essential to livestock-economy and ecoenvironment of northern China. Settlements in this desert are restricted to areas to permanent springs, shallow groundwater and oases to areas where irrigation is possible. Some nomads continue to eke out a precarious existence grazing livestock in the desert.

**Topography and geomorphology.** The Otindag Desert has a varied relief, combining extensive dune fields with rugged mountains along the eastern, southern and southeastern rims. In the east, the

Daxing'Anling Mountains stretch from the Heilong River Valley into the upper reach valleys of the Xilumulun River from northeast to southwest, gradually increasing in height northwards from about 180 m near Huma to Huanggangliang, where the highest peaks reach 2,029 m with an average elevation range from 1,100 to 1,400 m. In the south and southeast, the Yinshan Mountains decline gradually near Duolun and Zhenglanqi, and in some areas leave wide alluvial plains. The terrain of the Otindag Desert is less rough and elevations decrease from ca. 1300 m in the southeast to ca. 1000 m in the northwest. Over the greater part of this desert the ground cover consists of fixed and semi-fixed sandy dunes, with a few mobile dunes in area of little vegetation. The dominated dune types are represented from parabolic to barchans, linear and grid-formed types, ranging from a few meters to over 40 m in height (Zhu et al., 1980; Yang et al., 2008).

Climate, vegetation and soil. The climate of the Otindag Desert was not uniform in geological period, with much sand movement, occasional rainy years, and several wetter intervals during the Holocene (Yang et al., 2015; Tian et al., 2017). At present the whole desert belongs to the arid and semi-arid temperate zone, with a meanannual temperature of 2 °C in the north and 4°C in the south (Liu and Yang, 2013). At the regional scale, the climate of the desert is typically controlled by the East Asian Monsoon system, characterized by a warm summer, with precipitation transported by the EASM, and by a cold and dry winter under the influence of the East Asian Winter Monsoon (EAWM). The rainfall in the desert exhibits a wide variation in space and time. Influence of the EASM changes from southeast to northwest in the desert, and varies with latitude and distance from the Pacific Ocean, leading to the mean annual rainfall decreasing from ~450 mm in the southeast to ~150 mm in the northwest (Yang et al., 2013). This uneven distribution of precipitation has a major influence on the availability of near-surface moisture, consequently on the distribution of vegetation, soil and the animal husbandry potential of local communities. The basic soil cover consists of grey desert soil in the west and changes to sierozems and chernozem or chestnut soil in the east. Through the desert, vegetation is sparse in the west and relatively abundant in the east. The natural vegetation is characteristic of desert or semi-deserts, with scrub woodland in the east and steppe in the west. Due to the scarcity of surface water, the growing season is affected by temperature, rainfall and elevation, and hence cultivation is restricted mainly to flood plains.

Geology. The Otindag Desert is located in a tectonic depression of the Solonker Suture Zone (Jian et al., 2010) bounded by the Northern Early to Mid-Paleozoic Orogen Zone and the Hatug Uul Block to the north, the Southern Early to Mid-Paleozoic Orogen Zone and the North China Craton system to the south (Fig. 2). A few faults such as the Xar Moron Fault and Chifeng-Bayan Obo Fault stretch east and west, with its northern margin along the Solonker Suture Zone marked by a series of lake basins (Figs. 1 and 2). The tectonostratigraphic units and overall structural trends are mainly oriented NE–SW (Fig. 2), which may be interpreted as resulting from overall compressive stresses oriented principally in the NW–SE quadrants during orogenesis (Jian et al., 2010; Zhang et al., 2015). Diverse rock types from unlithified and lithified clastic sediments through to carbonate, crystalline, and volcanic rocks are distributed in and around the Otindag Desert (Zhang et al., 2015) (Figs. 2 and 3). Tertiary and Quaternary sandstones and mudstones are the common basement rocks under the dunes of the Otindag, and extensive volcanic basalts forming flat terrains are to the north (Zhu et al., 1980; Li et al., 1995).

Hydrology and hydrogeology. The Otindag Desert originated during the Late Quaternary (Yang et al., 2015) and various alluvial fans formed at the margins of this desert during the early to middle Holocene. These are composed of conglomerate and sand deposits, where major periodic streams or wadis debouched into the Otindag. At present two rivers run through the eastern margin of the Otindag Desert, i.e. the Xilamulun River in the north and the Shandian River and its two tributaries, the Shepi River and Tuligen River in the south. Both stem from the eastern and southeastern parts of the Otindag (Fig. 1). The Xilamulun River, 380 km in length and  $32.54 \times 10^3 \text{ km}^2$  in area, is a neighboring river both to the northeastern Otindag and the southeastern Dali Basin, the northern catchment of the Otindag Desert. The Xilamulun River flows to the east and finally goes into the Xiliao River, with an annual mean runoff of  $6.58 \times 10^8 \text{ m}^3$  (Wu et al., 2014). The Shandian River is the upper reach of the Luan River, with a length of 254 km and a catchment area of  $4.11 \times 10^3 \text{ km}^2$  (Yao et al., 2013). Along the low, flat and sandy shorelines of some lakes in the Otindag, salt flats or sabkhas have formed in shallow depressions. Due to the high rate of evaporation, salt crusts develop which have been locally exploited where the salt is relatively free from sand. During rainy season, some rain and floodwaters (generally coming from the Yinshan piedmonts) are retained in low-lying areas, which may temporarily recharge shallow aquifers. Under storm conditions, occasional heavy, short rainstorms cause floods in soil-rich wadi channels. Under other conditions, sand dunes and sand sheets bury the ground and sabkhas.

The Otindag Desert can depend on several water-bearing formations and units (aquifers) for their groundwater resources (Fig. 3). Coarse- to fine-grained sedimentary rocks, magmatic rocks and metamorphic rocks of the Inner Mongolia-Daxing'Anling Orogenic Belt (Zhang et al., 2015) form the major regional aquifer unit (Fig. 3). They are composed mainly of alluvial sediments (mid-Permian Zhesi Formation), melange (Solonker suture zone), A-type granite (early Permian), bimodal volcanic rocks with sedimentary intercalations (early Permian Dashizhai Formation), diorite-quartz diorite-granodiorite rocks (Carboniferous-Permian) and metamorphic complex (predominantly gneiss, early Paleozoic) (Fig. 2). The aquifer is generally unconfined in dune fields of the Otindag Desert, unconfined to semi-confined in the Yinshan Mountains' piedmont, and semi-confined to confined in the Daxing'Anling uplands (Fig. 3). Water-level measurement in June 2010 indicated that the general depth of unconfined groundwater level ranges between 10 to 70 m in the Otindag Desert (Fig. 3). Local granular aquifers in the central desert are composed of coarse fluvial, lacustrine and aeolian sediments, but their extent and thickness vary throughout the watershed (Zhu et al., 1980; Li et al., 1995). The generally coarse-grained texture of the unconsolidated rock formations provides primary porosity in terms of groundwater flow in the desert.

### 3. Methods

The hydrochemistry of natural water in the Otindag Desert, as related to the prevailing EASM climate, as well as, the dominant topographical, geological (tectonic) and hydrogeological conditions, are discussed here and interpreted, using chemical and isotope analyses of water samples from rain, springs, shallow aquifers and deep aquifers, rivers and lakes, and are represented on relevant graphs and diagrams. Fieldworks took place during the summer season of 2011 and the spring season of 2012. Water samples were mainly retrieved from shallow and deep wells located over a wide area in dune

fields of the study regions. The detailed locations of the sampling sites are shown in Fig. 4.

Two groups of parameters are measured to characterize the chemistry of any water analysis: field-measured parameters and lab-measured parameters. The field-measured parameters include temperature ( $^{\circ}\text{C}$ ), hydrogen-ion concentration (pH), electrical conductivity (EC in micro-Siemens per centimeter or  $\mu\text{S}/\text{cm}$ ) and total dissolved solid (TDS, mg/L). The values of these parameters change when they are not directly measured in the field. The number lab-measured parameters depend on the purpose of study. However, the measurement of major cations ( $\text{F}^{-}$ ,  $\text{Cl}^{-}$ ,  $\text{NO}_2^{-}$ ,  $\text{NO}_3^{-}$ ,  $\text{SO}_4^{2-}$ ,  $\text{HCO}_3^{-}$ ,  $\text{CO}_3^{2-}$  and  $\text{H}_2\text{PO}_4^{-}$ ) and anions ( $\text{Li}^{+}$ ,  $\text{Na}^{+}$ ,  $\text{NH}_4^{+}$ ,  $\text{K}^{+}$ ,  $\text{Mg}^{2+}$  and  $\text{Ca}^{2+}$ ) are determined in most chemical analyses. Analysis for stable ( $^2\text{H}$  and  $^{18}\text{O}$ ) and radioactive isotopes ( $^3\text{H}$ ) in rain and groundwater are also included. The analytical data of the physiochemical parameters and the stable and radioactive isotopes of the water samples collected in this study are listed in Tables 1, 2 and 3, respectively.

## 4. Results and Discussions

### 4.1. Hydrochemical characteristics of natural waters

The natural water samples collected in this study are generally neutral to slightly alkaline, with the pH values varying between 6.26 and 9.44 (except the precipitation sample p1, 4.61) (Table 1) and a median value of 7.27. The TDS values range between 67 and 660 mg/L (average 211 mg/L) (Table 1), all belonging to fresh water ( $\text{TDS} < 1000 \text{ mg/L}$ ) in the salination classification of natural water (Meybeck, 2004). The variations in ion concentrations of the major cations and anions in the studied water samples were displayed in a fingerprint diagram with a semi-logarithm y-axis (Fig. 5). The rain water sample is the most depleted in ions among these samples. The groundwater samples have the highest concentrations of cations and anions and the lake, river and spring waters had intermediate values. The calcium concentration is the highest among cations in almost all of the water samples, and the  $\text{HCO}_3^{-} + \text{CO}_3^{2-}$  concentration (bicarbonate + carbonate, alkalinity) is the highest among anions in most of the water samples. For several groundwater samples (g3, g4, g5, g6 and g11), spring sample (s1) and precipitation sample (p1), they have higher  $\text{SO}_4^{2-}$  concentrations than alkalinity (Fig. 5).

Two chemically distinct water types are recognized for the studied waters via a Piper diagram (Fig. 6), calcium bicarbonate and calcium sulphate. No Chloride-type and sodium-type waters occur in the study area (Fig. 6). Based on more than 10,000 chemical analyses of groundwater samples from the world, Chebotarev (1955) observed that the global groundwater tends to evolve chemically towards the composition of seawater. He also observed that this evolution is associated with regional changes in dominant anions but not cations, as the concentration of cations may exhibit a wide range of fluctuations in groundwater and is not as steady as the changes in anion dominance. Freeze and Cherry (1979) illustrated the Chebotarev's (1955) general evolution of groundwater as a anion evolution line:  $\text{HCO}_3^{-} \rightarrow \text{HCO}_3^{-} + \text{SO}_4^{2-} \rightarrow \text{SO}_4^{2-} + \text{HCO}_3^{-} \rightarrow \text{SO}_4^{2-} + \text{Cl}^{-} \rightarrow \text{Cl}^{-} + \text{SO}_4^{2-} \rightarrow \text{Cl}^{-}$ , which travels along the flow paths and increasing ages. On this evolution line, bicarbonate water is generally characteristic of low salinity, renewable water resources and low residence time, while sulphate waters predominate in groundwater passing through gypsum and anhydrite aquifers, and is usually associated with intermediate salinity in unconfined aquifers (Clark, 2015). The distribution pattern of water



chemical types occurred in the studied area indicates a primary stage of groundwater evolution in the Otindag Desert.

The  $\delta D$  values of the groundwater samples collected in this study varied from -63.42‰ to -75.92‰ (Table 3), with an average -69.53‰. The  $\delta^{18}O$  values ranged between -8.64‰ and -11.26‰ (Table 3), with an average -10.17‰. The spring water samples were relatively concentrated in  $\delta D$  and  $\delta^{18}O$  and were greatly similar to those of the groundwater samples (Fig. 7). The  $\delta D$  and  $\delta^{18}O$  values in the river water samples were slightly more variable and were also similar to those of the groundwater (Fig. 7). The lake water samples were enriched in  $\delta D$  and  $\delta^{18}O$  by comparison to the groundwater samples (Fig. 6). The precipitation sample p1 was also enriched in  $\delta D$  and  $\delta^{18}O$  by comparison to the groundwater samples (Fig. 7). The content of radioactive isotope of tritium ( $^3H$ ) measured in seven well groundwater samples with 6-60 m depth ranged from 1.86 to 24.35 TU (Table 3), with an average 14.95 TU, higher than the mean tritium concentration (9.8 TU) of groundwater in the Vienna Basin, Austria (Stolp et al., 2010), the seat of the International Atomic Energy Agency (IAEA).

If we plot the relationships between oxygen and hydrogen isotopes of groundwater, spring, river and lake water samples, we observed that the regression line that fits all data points can be described by the equation:  $\delta D = 4.09\delta^{18}O - 28.31$  ( $R^2=0.93$ ,  $n=24$ ) (EL1 in Fig. 7). This local groundwater line (LGWL) is different from the Global Meteoric Water Line (GMWL,  $\delta D = 8\delta^{18}O + 10$ ) and the Mediterranean Meteoric Water Line (MMWL,  $\delta D = 8\delta^{18}O + 20$ ) estimated by Craig (1961), but it is similar to the local groundwater lines established for other deserts in northern China and central Asia with a same slope but different Y-intercepts, such as  $\delta D = 4.17\delta^{18}O - 31.3$  for the Badanjilin Desert (Jin et al., 2018),  $\delta D = 4.8\delta^{18}O - 15.2$  for the Ejina Desert in China (Wang et al., 2013), and  $\delta D = 4.26\delta^{18}O + 9.23$  for the Rub Al Khal Desert in the United Arab Emirates (Rizk and El-Etr, 1997). The scatter of stable isotope data points for the lake water samples (Fig. 7) in the Otindag suggests that the lake waters are affected by evaporation, but the other waters in the desert are not so.

#### 4.2. Local precipitation recharge on groundwater in the Otindag

To incorporate the isotopic analysis of precipitation with similar areas in the studied area, local data (p1) was plotted with those of Baotou (Fig. 7). The isotopic composition of rainfall in Baotou, the nearest long-term station to the Otindag Desert, was monitored for the period 1986-2001 within the scope of the International Atomic Energy Agency/World Meteorological Organization (IAEA/WMO) global survey. The stable isotope data available from this station was used to provide basic characteristics of the stable isotopic composition of the present-day meteoric water, especially in the westward inland areas of the Otindag Desert (Fig. 1). Stable isotope data of the Tianjin station was also used to characterize precipitation of the eastern coastal areas of the Otindag Desert (Fig. 1).

Based on the isotopic data from the Baotou station, the local meteoric water lines can be statistically expressed as the isotopic regression equation of  $\delta D = 6.36\delta^{18}O - 5.21$  (LMWL-B). It can also be expressed as  $\delta D = 6.57\delta^{18}O + 0.31$  (LWML-T), based on the data from the Tianjin station (Fig. 7). The precipitation sample p1 collected in this study fell onto the GMWL (Fig. 7). It also showed similar  $\delta D$  and  $\delta^{18}O$  values to those of the precipitation collected in the GNIP stations of Baotou and Tianjin (Fig. 7).

Compared to the precipitation data from the GNIP stations and from the local precipitation (p1), the groundwater, spring, and river water samples were evidently depleted in heavy stable isotopes in the Otindag (Fig. 7). Except for the lake water samples, most of the groundwater, river water and spring water samples in the Otindag fall on or lay between the LMWL-B and the LMWL-T lines, and are located at the lower left area of the precipitation points (Fig. 7).

Because the isotopic evolution of  $\delta D$  and  $\delta^{18}O$  in water illustrated in the Craig line represents a one-way and irreversible process, the water bodies distributed at the upper right area of the Craig line can not be recharge sources for the water bodies distributed at the lower left area of the line. Such results indicate that the groundwater, river water and spring water in the Otindag are not recharged by the regional precipitation, namely no significant modern direct recharge has taken place for groundwater in the Otindag.

Dogramaci et al. (2012) documented that only intense and remarkable rainfall events  $>20$  mm could recharge groundwater in the semi-arid Hamersley Basin of northwest Australia, while the rainfall events  $<20$  mm had limited influences on groundwater recharge. Chen et al. (2014) described that rainfall events  $\leq 5$  mm in the arid and semi-arid region of northern China would be evaporated into the atmosphere rapidly before it is infiltrated into the groundwater system. Based on the analysis on the data records from two meteorological stations around the Otindag, i.e. the Duolun and Xilinhaote stations (see Fig. 1a), we observed that rainfall events  $>20$  mm on average only occur 2.5-3.4 times per year (Table 4). In some years (e.g. from 2005 to 2007 at the Xilinhaote Station), no rainfall events  $>20$  mm even occurred. It further indicated the limited contribution of regional precipitation on groundwater recharge in the Otindag.

In addition to groundwater, the river and spring water samples from the Otindag also deviated from the local precipitation in the Craig diagram (Fig. 7). These water samples came from the Xilamulun, Shepi and Tuligen rivers. They shared the same evaporation line (EL1) with the groundwater and lake water samples (Fig. 7). Generally speaking, natural waters that have a same recharge source are distributed on a same line of evaporation in the  $\delta^2$  and  $\delta^{18}O$  diagram (Chen et al., 2012b). This indicates that the recharge sources of groundwater, river water, spring water and lake water in the Otindag are genetically associated each other and differ from the local precipitation.

#### **4.3. Winter precipitation and palaeowater recharge on groundwater in the Otindag**

Since the groundwater samples in the Otindag are depleted in their  $\delta D$  and  $\delta^{18}O$  values even more than those of the local rainfall (Fig. 7), they must be sourced from other waters characterized by similar or more depleted signals in their stable isotopes compositions. Due to the temperature effect (such as evaporation) on isotopic fractionation, only the waters issued from colder environments can be more depleted in their  $\delta D$  and  $\delta^{18}O$  values even more than those of the local rainfall.

Because the Otindag Desert is under the control of the EASM climate (Fig. 1), the local rainfall in the desert is mainly sourced from summer precipitation. This can also be illustrated by the seasonal distributions in annual mean precipitation (Fig. 8a), in annual mean air temperature (Fig. 8b) and in annual mean water vapor pressure (Fig. 8c) over the last forty years at the two surrounding GNIP weather stations in Baotou and Tianjin. The seasonal distributions of stable isotopes in the two stations

(Fig. 8d-e) show that the summer rainfall is evidently positive in its signals of  $\delta D$  and  $\delta^{18}O$  by comparison with those of the winter rainfall, further suggesting that the waters issued from cold environments can be more depleted in their  $\delta D$  and  $\delta^{18}O$  values than those of the summer rainfall. Thus we speculate that groundwater in the Otindag can be potentially derived from (1) modern precipitation in winter, (2) palaeowater formed in the past glacial period, or (3) remote/mountains waters that emanate in colder and wetter conditions.

The annual mean values of  $\delta D$  and  $\delta^{18}O$  over the last forty years are more depleted in winter precipitation than in summer precipitation at the Baotou and Tianjin stations (Fig. 8d-e). This isotopic signal qualifies the regional winter precipitation to be a potential source of groundwaters in the Otindag. However, the precipitation amounts and the water vapor pressures (effective moisture) in winter months are much lower than those in the summer months at both the Baotou and Tianjin stations (Fig. 8a and 8c). It indicates that the winter seasons in these regions are relatively colder and drier but not colder and wetter. A colder-wetter winter season is a necessary condition for winter precipitation to be a water source for the formation of groundwater under a summer monsoon climate. This is because the bigger amounts of summer precipitation will easily remove or weaken the depleted isotopic signals of winter precipitation in groundwater. In this regard, modern winter precipitation is unlikely to be an important source of groundwater in the Otindag.

As to the palaeowaters formed in colder and wetter periods such as the last glacial, it has been proposed to be a potential water source for groundwaters in the wide arid lands of the world. The depleted signals of stable isotopes ( $\delta D$  and  $\delta^{18}O$ ) in groundwater have been recognized in global arid and semi-arid regions, such as the Sinai Desert in Egypt (Gat and Issar, 1974), Israel (Gat, 1983), South Australia (Love et al., 1994, 2000), northern China (Ma et al., 2010), Saudi Arabia (Bazuhair and Wood, 1996) and North Africa (Guendouz et al., 2003). These signals are very often explained as palaeo-groundwater that recharged by precipitation during past wetter and colder periods (Love et al., 1994, 2000; Herczeg and Leaney, 2011).

Here we use the tritium data as an environmental tracer to estimate the groundwater age in the Otindag. The tritium data at the GNIP stations of the Baotou and Tianjin are also referenced as the background values in precipitation of recent years. The residence time of groundwater in aquifer and the residual tritium of a water body can be calculated by  $N = N_0 e^{-\lambda t}$  (Yang and Williams, 2003). Where  $N$  = content of residual tritium in water sample,  $\lambda = 0.0565$ , the radioactive decay constant,  $N_0$  = content of tritium at the time of rainfall and  $t$  = years after precipitation. Based on this equation, the residual tritium was theoretically calculated and the standard for tritium dating was established for seven groundwater samples in the Otindag Desert (Table 3). As a result, ages of 0-60 years were obtained for these groundwater samples (Table 5). This indicates that recent recharge took place several decades after the peak in global nuclear tests. We thus conclude that groundwater is generally not older than 70 years in the study area. It means that groundwater in the Otindag are not palaeowater recharged.

Both the modern summer and winter precipitation recharge and the palaeowater recharge can be refuted, indicating that direct recharge is not a major mechanism controlling the groundwater recharge in the Otindag.

#### 4. 4. Remote water recharge on groundwater in the Otindag: Dali Basin

The third hypothesis that “remote/mountain waters emanate under colder and wetter conditions” is further considered here. In essence, it is an indirect recharge mechanism as water originates from remote areas (Healy, 2010; Herczeg and Leaney, 2011).

It is worth noting that the values of deuterium and oxygen-18 for groundwater in the north part of the study area are more depleted in  $\delta D$  and  $\delta^{18}O$  than those in the south part (Table 3). It suggests that the Otindag groundwater might be potentially recharged by water resources coming from the northern neighboring catchment, such as the Dali Basin.

Recently published data of  $\delta D$  and  $\delta^{18}O$  in groundwater, lake water, river water and spring water sampled from the Dali Basin (e.g., Chen et al., 2008; Zhen et al., 2014) were compiled in this study and were co-analyzed with the data from the Otindag. About 70 natural water samples from the Dali and Otindag with  $\delta D$  and  $\delta^{18}O$  values are shown in a Craig diagram (Fig. 9). All of these samples fell on or lied near the evaporation line EL2 in the Craig diagram (Fig. 9), with a regression equation of  $\delta D = 4.81\delta^{18}O - 21.55$  and a high correlation coefficient ( $R^2=0.98$ ,  $n=70$ ). Compared to the groundwater samples in the Otindag, water samples from the groundwaters, rivers and springs from the Dali Basin are more depleted in  $\delta^{18}O$  and  $\delta D$  (Fig. 9). Such results further indicate that, in terms of its isotopic signature, the groundwater in the Otindag has a close relationship with the natural waters in the Dali Basin.

The similar signals of  $\delta D$  and  $\delta^{18}O$  between the groundwater in the Otindag and the river water in the Dali (Fig. 9) point towards the idea that the groundwater in the Otindag might be sourced from the river water in the Dali Basin, since the Dali has more depleted isotopic signals in water than the Otindag (Fig. 9). Considering the topographical gradient of elevations between the two regions, however, river water in the Dali Basin cannot flow into the eastern Otindag, because the terrain elevation of the Dali Basin is lower than that of the Otindag (Fig. 1). This is also the reason why the huge Dali Lake that lies in the Dali Basin has no equivalent in the Otindag (Fig. 1). If there is a hydraulic linkage between the two regions, water should flow from the Otindag into the Dali, but not conversely.

In view of the hydraulic gradient, river water in the Dali Basin could not be a recharge source for groundwater in the Otindag. However, in view of the isotopic gradients, groundwater in the Otindag could not conversely be the source of river water in the Dali (Fig. 9). Thus, the similar isotopic signals between the river water in Dali and the groundwater in Otindag indicate that these waters might be recharged from a common source.

Similar isotopic signals also occurred in the groundwaters between the Otindag and the Dali Basin (Fig. 9). In order to understand the linkage of groundwaters between the two regions, the potential movement of groundwater in the transition zone of the two regions need to be known. In this study, a groundwater-sampling project was designed in the field along a N-S section of a palaeo-channel located at the transition zone between the Dali and Otindag (Figs. 1, 2). The channel was named “PCSX” in this study, with its north part named “NPCSX” and the south part named “SPCSX”.

The GPS elevation of the northernmost sampling site in the NPCSX (g11, about 1317 m a.s.l.) was

much lower than that of the southernmost site in the SPCSX (g1, 1396 ma.s.l.) (Fig. 2 and Table 1). Regarding to the topographical gradient in the channel, there is a drop of about 80 m between the NPCSX and the SPCSX. Under such slope, the underground hydraulic gradient for groundwater flow can be roughly parallel with that of the surface water flow, namely that the groundwaterflow should move downwards from the SPCSX area into the NPCSX area. Thus we can speculate that groundwater in the NPCSX would have higher salinity than those in the SPCSX under such flowing direction. In order to verify this speculation, actual variations of water salinity (chloride and TDS) were detected along the PCSX section. The sampling site g1 was defined as the initial point and the distances between g1 and other sampling sites along the PCSX section were calculated, based on their GPS geographical coordinates measured in the field. The results are shown in Fig. 10a-b. It is clear that the variations of chloride and TDS concentrations in groundwater do not increase along the palaeo-channel from south to north (Fig. 10a-b). On the contrary, both the values of chloride and TDS are lower in the NPCSX area than those in the SPCSX area. Such kind of spatial variations in the chloride and TDS values contradict the speculated patterns abovementioned, suggesting that the hydraulic gradient of groundwater flowing path in this region is not controlled by the topographical gradient between the NPCSX and SPCSX areas.

Compared between the NPCSX and SPCSX regions, the stable isotopic values ( $\delta^{18}\text{O}$  and  $\delta\text{D}$ ) of groundwaters in the SPCSX region vary greatly with a large amplitude, while those in the NPCSX are relatively constant (Fig. 10c-d). The constant variations indicate that the recharge source of groundwater in the NPCSX is relatively unitary. The isotopic values in the SPCSX are much lighter than those in the NPCSX along the distance section from south to north (Fig. 10c-d). The heaviest values occurred in the sample g11 collected from the NPCSX (Fig. 10c-d), indicating a water being earlier recharged. The spring water sample s2, a representation of discharge water, is characterized by medium values of  $\delta\text{D}$  and  $\delta^{18}\text{O}$ . These results indicate that the groundwaters in the SPCSX area, with relatively enriched isotopic signals in  $\delta\text{D}$  and  $\delta^{18}\text{O}$  by comparison with those in the NPCSX area, are composed of a mixture of the groundwaters in the NPCSX with other waters.

The tritium contents were broadly and positively related to the values of deuterium excess in the groundwater samples in the PCSX (Fig. 10e). For water that experiences an evaporation process, the d-excess value will increase in the evaporated water vapor, but will decrease in the residual water body (Dansgaard, 1964; Merlivat and Jouzel, 1979). In this study, except for sample g11 (a sample very close to the riverhead area), the positive relationship between the tritium and the deuterium excess generally shows that the d-excess values are higher in the groundwaters collected from the NPCSX, but are lower in those from the SPCSX (Fig. 10e). This distribution pattern indicates that the groundwaters in the NPCSX are relatively younger and experienced a lower degree of evaporation than those in the SPCSX. The d-excess gradient, increasing from south to north in the PCSX, further suggests that groundwater does not flow from the SPCSX area to the NPCSX area, namely out of the topographical control.

Many studies (e.g., Boronina et al., 2005; Kazemi et al., 2006) have demonstrated that groundwater flows in the direction in which it gets older. In view of this point, groundwaters in the PCSX region should flow from the NPCSX area to the SPCSX area, in opposition to the S-N

topographical gradient between the Otindag and Dali regions. Thus groundwater in the Dali are not the source of groundwater in the Otindag. The similar isotopic signals between groundwaters in the two regions indicate that these waters might be recharged from a common source in other place.

#### **4. 5. Remote water recharge on groundwater in the Otindag: mountains waters**

The discussions above revealed that both the groundwaters in the Otindag and DaliBasin might be recharged from a common source derived from another place. Considering the third hypothesis abovementioned that “remote/mountains waters emanate under colder and wetter conditions”, we propose that this “common source” of the two regions are from mountains areas surrounding the Otindag and Dali Basin.

There are two large permanent rivers and lots of small intermittent streams entering the Dali Basin (Xiao et al., 2008), including the Xilamulun River to the south and the Gongger River to the north, both of which are stemming from the Greater Khingan Mountains (Daxing’Anling Mountains in Chinese pinyin, 1,100-1,400 m above seal level) (Fig. 1). The Xilamulun River carries a large amount of water (about  $6.58 \times 10^8 \text{ m}^3/\text{y}$ ) from the Daxing’Anling Mountains flowing through the east margins of the Dali and Otindag (Wu et al., 2014). This is an important clue linking natural waters between the Otindag and Dali Basin.

Variation in the elevation from the Dali Lake to the riverhead of the Xilamulun River can be clearly found along a land surface topographical section (Fig. 11). The channel of the Xilamulun River is located in the Xar Moron Fault (Fig. 1), which is a part of the Solonker Suture Zone (Eizenhöfer et al., 2014) or the Xilamulun-Changchun-Yanji plate suture zone (Sun et al., 2004) in the regional tectonical settings (Fig. 2). Outcrop observations indicate that fault zones commonly have a permeability structure suggesting they should act as complex conduit–barrier systems in which along-fault flow is encouraged and across-fault flow is impeded (Bense et al., 2013). Thus the hydraulic gradient of groundwater flow in the Eastern margins of the Otindag and Dali Basin must be controlled by the fault zone hydrogeology. This may be the reason why the hydraulic gradient of groundwater represented by the isotopic and hydrogeochemical gradients of groundwater samples in this study is not consistent with the local topographical gradient in the Otindag Desert. On the other hand, the regional aquifer is generally unconfined in dune fields of the Otindag Desert but semi-confined to confined in the Daxing’Anling uplands (Fig. 3), thus the thick unconsolidated aquifers in the study area (Figs. 3 and 11) will be favourable conditions for groundwater storage and transportation along the Solonker Suture Zone. When rivers stem from the Daxing’Anling Mountains and flow downward to the marginal areas of the Dali and Otindag, leakage water from these rivers can recharge the desert land through thick unconsolidated aquifers. A strong isotopic evidence is that the lake and river waters in the Dali Basin share the same evaporation line (EL2) with the groundwaters in the PCSX area.

Although groundwaters in the SPCSX area are different from those in the NPCSX area, their isotopic data points still fell onto the EL2 (Fig. 9), which further indicates that the groundwaters in the SPCSX are a mixture of waters from the Daxing’Anling Mountain and other sources. Another source for groundwater recharge in the SPCSX could be represented by remote water such as flash floods

coming from the north Yinshan Mountains, because it can be clearly observed from digital maps that many transient rivers or streams originated from the Yinshan Mountains flow into the south and southeastern Otindag (Fig. 1). Supportive evidence for this idea can also be observed in the summer rainy season. During rainy days or under storm conditions, occasional heavy, short rainstorms cause floods in soil-rich wadi channels and low-lying depressions in the unconfined to semi-confined areas of the Yinshan Mountains' piedmont. These waters may temporarily recharge shallow aquifers in the SPCSX area.

## 5. Conclusions

In the middle-latitude desert zone of northern China, many deserts such as the Otindag and Badanjilin Deserts, are unexpectedly rich in groundwater resources, although they have no surface runoff and have been under an arid or hyper-arid climate for a long period of time. How groundwaters originated and recharged in these deserts are thus key questions that are still under debate. For some earth scientists, the direct recharge is thought to be very important for groundwaters in the wide desert lands of northern China, due to the lack of surface runoffs. However, groundwater availability is very much a function of the local- and regional-scale geological and climatic settings. To achieve an integrated understanding of the groundwater recharge and its controlling mechanisms is of great significance. In this study, groundwater recharge was explored using multiple environmental tracers in the Otindag Desert of northern China, a region that is under the influence of the East Asian Summer Monsoon (EASM) climate. Compared to modern summer precipitation, the groundwaters, river waters and spring waters are depleted in  $\delta D$  and  $\delta^{18}O$ . All these waters shared a same Craig line, indicating a genetic relationship on their recharge sources. The stable isotopic signals of the groundwaters is more depleted than those of the modern summer precipitation and this suggests that the groundwaters studied could only be sourced from cold water different from the EASM precipitation. In general, the analyses revealed that the highland remote water resources from the Daxing'anling and Yinshan Mountains were isotopically and geochemically traced to be a major source for the groundwater in the Otindag. It suggests that the modern indirect recharge mechanism, instead of the direct recharge and the palaeo-water recharge, is the most significant for groundwater recharge in the eastern Otindag. This study provides a new perspective into the origin and evolution of groundwater resources in the middle-latitude desert zone of northern China.

## Acknowledgements

This study was financially supported by the National Natural Science Foundation of China (41771014 and 41602196) and the National Key Research and Development Program of China (2016YFA0601900). We thank the China Meteorological Data Sharing Service system for providing the weather data. Sincere thanks are also extended to Profs. Xiaoping Yang, Xunming Wang, Jule Xiao and other workmates, e.g., Ziting Liu, Hongwei Li, and Deguo Zhang for their generous help in the research work.

## References:

517 Bazuhair, A.S., and Wood, W.W.: Chloride mass-balance method for estimating ground water recharge  
 518 in arid areas: examples from western Saudi Arabia. *Journal of Hydorlogy*, 186, 153-159, 1996.

519 Bense, V.F., Gleeson, T., Loveless, S.E., Bour, O., and Scibek, J.: Fault zone hydrogeology.  
 520 *Earth-Science Reviews*, 127, 171-192, 2013.

521 Blasch, K.W., and Bryson, J.R.: Distinguishing sources of ground water recharge by using  $\delta^2\text{H}$  and  
 522  $\delta^{18}\text{O}$ . *Ground Water*, 45, 294-308, 2007.

523 Boronina, A., Renard, P., Balderer, W., and Stichler, W.: Application of tritium in precipitation and in  
 524 groundwater of the Kouris catchment (Cyprus) for description of the regional groundwater flow.  
 525 *Applied Geochemistry*, 20, 1292-1308, 2005.

526 Chebotarev, I.I.: Metamorphism of natural waters in the crust of weathering. *Geochimica et &*  
 527 *Cosmochimica Acta*, 8,22-32, 1955.

528 Chen, F., Chen, J., Holmes, J., Boomer, I., Austin, P., Gates, J.B., Wang, N., Brooks, S.J., and Zhang, J.:  
 529 Moisture changes over the last millennium in arid central Asia: a review, synthesis and  
 530 comparison with monsoon region. *Quaternary Science Reviews*, 29, 1055-1068, 2010.

531 Chen, J., Chen, X., and Wang, T.: Isotopes tracer research of wet sand layer water sources in Alxa  
 532 Desert. *Advances in Water Science*, 25, 196-206 , 2014 (in Chinese).

533 Chen, J., Li, L., Wang, J., Barry, D.A., Sheng, X., Gu, W., Zhao, X., and Chen, L.: Water resources:  
 534 groundwater maintains dune landscape. *Nature*, 432, 459-460, 2004.

535 Chen, J., Liu, X., Wang, C., Rao, W., Tan, H., Dong, H., Sun, X., Wang, Y., and Su, Z.: Isotopic  
 536 constraints on the origin of groundwater in the Ordos Basin of northern China. *Environmental*  
 537 *Earth Sciences*, 66, 505-517, 2012a.

538 Chen, J., Sun, X., Gu, W., Tan, H., Rao, W., Dong, H., Liu, X., and Su, Z.: Isotopic and hydrochemical  
 539 data to restrict the origin of the groundwater in the Badain Jaran Desert, Northern China.  
 540 *Geochemistry International* 50, 455-465, 2012b.

541 Chen, J., Yang, Q., and Hao, G.: Using hydrochemical and environmental isotopical data to analyse  
 542 groundwater recharge in the Hunshandake Sandy Land. *Inner Mongolia Science Technology &*  
 543 *Economy*, 17, 9-12, 2008 (in Chinese).

544 Clark, I.D.: *Groundwater Geochemistry and Isotopes*. CRC Press, Boca Raton, 2015.

545 Craig, H.: Isotopic Variations in Meteoric Waters. *Science*, 133, 1702-1703, 1961.

546 Dansgaard, W.: Stable isotopes in precipitation. *Tellus*, 16, 436-468, 1964.

547 Dogramaci, S., Skrzypek, G., Dodson, W., and Grierson, P.F.: Stable isotope and hydrochemical  
 548 evolution of groundwater in the semi-arid Hamersley Basin of subtropical northwest Australia.  
 549 *Journal of hydrology*, 475, 281-293, 2012.

550 Doll, P., and Fiedler, K.: Global-scale modeling of groundwater recharge. *Hydrology and Earth System*  
 551 *Sciences*, 12, 863-885, 2008.

552 Doll, P.: Vulnerability to the impact of climate change on renewable groundwater resources: a  
 553 global-scale assessment. *Environmental Research Letters*, 4, 035006,  
 554 doi:10.1088/1748-9326/4/3/035006, 2009.

555 Drever, J.I.: Catchment mass balance. In: Saether, O.M., and de Caritat, P. (Eds.), *Geochemical*  
 556 *Processes, Weathering and Groundwater Recharge in Catchments*. A.A, Balkema, Rotterdam, pp.



241-261, 1997.

Edmunds, W.M., Ma, J., Aeschbach-Hertig, W., Kipfer, R., and Darbyshire, D.P.F.: Groundwater recharge history and hydrogeochemical evolution in the Minqin Basin, North West China. *Applied Geochemistry*, 21, 2148-2170, 2006.

Eizenhöfer, P.R., Zhao, G., Zhang, J., and Sun, M.: Final closure of the Paleo-Asian Ocean along the Solonker Suture Zone: Constraints from geochronological and geochemical data of Permian volcanic and sedimentary rocks. *Tectonics*, 33, 441-463, 2014.

Freeze, R.A., and Cherry, J.A.: *Groundwater*. Prentice-Hall, Inc, New Jersey, 1979.

Gat, J.R.: Precipitation, groundwater and surface waters: control of climate parameters on their isotopic composition and their utilization as palaeoclimatological tools. In: *Palaeoclimates and palaeowaters: a collection of environmental isotope studies*. Proc. Adv. Gp. Meeting, Vienna, 25–28 Nov 1980, pp 3–12, IAEA, Vienna, 1983.

Gat, J.R., and Issar, A.: Desert isotope hydrology: water sources of the Sinai Desert. *Geochimica et Cosmochimica Acta*, 38, 1117-1131, 1974.

Gates, J., Edmunds, W.M., Ma, J., and Scanlon, B.: Estimating groundwater recharge in a cold desert environment in northern China using chloride. *Hydrogeology Journal*, 16, 893-910, 2008.

Giordano, M.: Global groundwater? Issues and solutions. *Annual Review of Environment and Resources*, 34, 153-178, 2009.

Guendouz, A., Moulla, A.S., Edmunds, W.M., Zouari, K., Shand, P., and Mamou, A.: Hydrogeochemical and isotopic evolution of water in the Complexe Terminal aquifer in the Algerian Sahara. *Hydrogeology Journal*, 11, 483-495, 2003.

Healy, R.W.: *Estimating groundwater recharge*. Cambridge University Press, New York, 2010.

Herczeg, A.L., and Leaney, F.: Review: environmental tracers in arid-zone hydrology. *Hydrogeology Journal*, 19, 17-29, 2011.

Jahn, B.M.: The Central Asian Orogenic Belt and growth of the continental crust in the Phanerozoic. *Geological Society London Special Publications*, 226, 73-100, 2004.

Jian, P., Liu, D., Kroner, A., Windley, B.F., Shi, Y., Zhang, W., Zhang, F., Miao, L., Zhang, L., and Tomurhuu, D.: Evolution of a Permian intraoceanic arc-trench system in the Solonker suture zone, Central Asian Orogenic Belt, China and Mongolia. *Lithos*, 118, 169-190, 2010.

Jin, K., Rao, W., Tan, H., Song, Y., Yong, B., Zheng, Y., Chen, T., and Han, L.: H-O isotopic and chemical characteristics of a precipitation-lake water-groundwater system in a desert area. *Journal of Hydrology*, 559, 848-860, 2018.

Jobbágy, E., Noretto, M., Villagra, P., and Jackson, R.: Water subsidies from mountains to deserts: their role in sustaining groundwater-fed oases in a sandy landscape. *Ecological Applications*, 21, 678-694, 2011.

Kazemi, G.A., Lehr, J.H., and Perrochet, P.: *Groundwater age*. John Wiley & Sons, Hoboken, 2006.

Li, J.: Permian geodynamic settings of Northeast China and adjacent regions: closure of the Paleo-Asian Ocean and subduction of the Paleo-Pacific Plate. *Journal of Asian Earth Sciences*, 26, 207-224.

Li, S., Sun, W., Li, X., and Zhang, B.: Sedimentary characteristics and environmental evolution of Otindag sandy land in Holocene. *Journal of Desert Research*, 15, 323-331, 1995 (in Chinese).

- Liu, Z., and Yang, X.: Geochemical-geomorphological evidence for the provenance of aeolian sands and sedimentary environments in the Hunshandake Sandy Land, eastern Inner Mongolia, China. *Acta Geologica Sinica (English Edition)*, 87, 871-884, 2013.
- Love, A.J., Herczeg, A.L., Leaney, F.W., Stadter, M.H., Dighton, J.C., and Armstrong, D.: Groundwater residence time and palaeohydrology in the Otway Basin, South Australia. *Journal of Hydrology*, 153, 157–187, 1994.
- Love, A.J., Herczeg, A.L., Sampson, L., Cresswell, R.G., and Fifield, L.K.: Sources of chloride and implications for  $^{36}\text{Cl}$  dating of old groundwater, south-western Great Artesian basin, Australia. *Water Resources Research*, 36(6), 1561-1574, 2000.
- Ma, J., Ding, Z., Gates, J.B., and Su, Y.: Chloride and the environmental isotopes as the indicators of the groundwater recharge in the Gobi Desert, northwest China. *Environmental Geology*, 55, 1407-1419, 2008.
- Ma, J., and Edmunds, W.M.: Groundwater and lake evolution in the BadainJaran Desert ecosystem, Inner Mongolia. *Hydrogeology Journal*, 14, 1231-1243, 2006.
- Ma, J., Pan, F., Chen, L., Edmunds, W.M., Ding, Z., He, J., Zhou, K., and Huang, T.: Isotopic and geochemical evidence of recharge sources and water quality in the Quaternary aquifer beneath Jinchang city, NW China. *Applied Geochemistry*, 25, 996-1007, 2010.
- Merlivat, L., and Jouzel, J.: Global climatic interpretation of the deuterium-oxygen 18 relationship for precipitation. *Journal of Geophysical Research*, 84, 5029-5033, 1979.
- Meybeck, M.: Global occurrence of major elements in rivers. In: Drever, J.I. (Ed.), *Surface and Ground Water, Weathering, and Soils*. Holland, H.D., and Turekian, K.K. (Exec.Eds), *Treatise on Geochemistry*, vol. 5. Elsevier-Pergamon, Oxford, pp. 207-223, 2004.
- Petrides, B., Cartwright, I., and Weaver, T.R.: The evolution of groundwater in the Tyrrell catchment, south-central Murray Basin, Victoria, Australia. *Hydrogeology Journal*, 14, 1522-1543, 2006.
- Rizk, Z.S., and El-Etr, H.A.: Hydrogeology and hydrogeochemistry of some springs in the United Arab Emirates. *Arabian Journal for Science and Engineering*, 22, 95-111, 1997.
- Scanlon, B.R., Keese, K.E., Flint, A.L., Flint, L.E., Gaye, C.B., Edmunds, W.M., and Simmers, I.: Global synthesis of groundwater recharge in semiarid and arid regions. *Hydrological Processes*, 20, 3335-3370, 2006.
- Seiler, K.P., and Gat, J.R.: *Groundwater Recharge From Run-Off, Infiltration and Percolation*. Springer, The Netherlands, 2007.
- Stolp, B.J., Solomon, D.K., Suckow, A., Vitvar, T., Rank, D., Aggarwal, P.K., and Han, L.F.: Age dating base flow at springs and gaining streams using helium - 3 and tritium: Fische - Dagnitz system, southern Vienna Basin, Austria. *Water Resources Research*, 46, W07503, doi:10.1029/2009WR008006, 2010.
- Sultan, M., Sturchio, N., Gheith, H., Hady, Y.A., and Anbeawy, M.: Chemical and Isotopic Constraints on the Origin of Wadi EliTarfa Ground Water, Eastern Desert, Egypt. *Ground Water*, 38, 743-751, 2000.
- Sun, D., Wu, F., Zhang, Y., and Gao, S.: The final closing time of the west Lamulun River-Changchun-Yanji plate suture zone-Evidence from the Dayushan granitic pluton, Jilin

Province. *Journal of Jilin University (Earth Science Edition)*, 34, 174-181, 2004 (in Chinese).

Sun, J., Ye, J., Wu, W., Ni, X., Bi, S., Zhang, Z., Liu, W., and Meng, J.: Late Oligocene-Miocene mid-latitude aridification and wind patterns in the Asian interior. *Geology*, 38, 515–518, 2010.

Tian, F., Wang, Y., Liu, J., Tang, W., and Jiang, N.: Late Holocene climate change inferred from a lacustrine sedimentary sequence in southern Inner Mongolia, China. *Quaternary International*, 452, 22-32, 2017.

Wang, P., Yu, J., Zhang, Y., and Liu, C.: Groundwater recharge and hydrogeochemical evolution in the Ejina Basin, northwest China. *Journal of Hydrology*, 476, 72-86, 2013.

Wang, Q., and Liu, X.Y.: Paleoplate tectonics between Cathaysia and Angaraland in Inner Mongolia of China. *Tectonics*, 5, 1073-1088, 1986.

Wang, W., and Feng, Z.D.: Holocene moisture evolution across the Mongolian Plateau and its surrounding areas: a synthesis of climatic records. *Earth-Science Reviews* 122, 38-57, 2013.

Wu, J., An, N., Ji, Y., and Wei, X.: Analysis on Characteristics of Precipitation and Runoff in Silas MuLun River Basin. *Meteorology Journal of Inner Mongolia*, 23-25, 2014 (in Chinese).

Xiao, J., Si, B., Zhai, D., Itoh, S., and Lomtadze, Z.: Hydrology of Dali Lake in central-eastern Inner Mongolia and Holocene East Asian monsoon variability. *Journal of Paleolimnology*, 40, 519-528, 2008.

Yang, X., Li, H., and Conacher, A.: Large-scale controls on the development of sand seas in northern China. *Quaternary International*, 250, 74-83, 2012.

Yang, X., Ma, N., Dong, J., Zhu, B., Xu, B., Ma, Z., and Liu, J.: Recharge to the inter-dune lakes and Holocene climatic changes in the BadainJaran Desert, western China. *Quaternary Research*, 73, 10-19, 2010.

Yang, X., Scuderi, L.A., Wang, X., Scuderi, L.J., Zhang, D., Li, H., Forman, S., Xu, Q., Wang, R., Huang, W., and Yang, S.: Groundwater sapping as the cause of irreversible desertification of Hunshandake Sandy Lands, Inner Mongolia, northern China. *PNAS*, 112, 702-706, 2015.

Yang, X., Wang, X., Liu, Z., Li, H., Ren, X., Zhang, D., Ma, Z., Rioual, P., Jin, X., and Scuderi, L.: Initiation and variation of the dune fields in semi-arid China – with a special reference to the Hunshandake Sandy Land, Inner Mongolia. *Quaternary Science Reviews*, 78, 369-380, 2013.

Yang, X., and Williams, M.A.J.: The ion chemistry of lakes and late Holocene desiccation in the BadainJaran Desert, Inner Mongolia, China. *Catena*, 51, 45-60, 2003.

Yang, X., Zhu, B., Wang, X., Li, C., Zhou, Z., Chen, J., Yin, J., and Lu, Y.: Late Quaternary environmental changes and organic carbon density in the Hunshandake Sandy Land, eastern Inner Mongolia, China. *Global and Planetary Change*, 61, 70-78, 2008.

Yao, S., Zhu, Z., Zhang, S., Zhang, S., and Li, Y.: Using SWAT model to simulate the discharge of the river Shandianhe in Inner Mongolia. *Journal of Arid Land Resources and Environment*, 27, 175-180, 2013 (in Chinese).

Zhang, Z., Li, K., Li, J., Tang, W., Chen, Y., and Luo, Z.: Geochronology and geochemistry of the Eastern Erenhot ophiolitic complex: implications for the tectonic evolution of the Inner Mongolia-Daxinganling Orogenic Belt. *Journal of Asian Earth Sciences*, 97, 279-293, 2015.

Zhao, J., Ma, Y., Luo, X., Yue, D., Shao, T., and Dong, Z.: The discovery of surface runoff in the

- megadunes of BadainJaran Desert, China, and its significance. *Science China Earth Sciences*, 60, 707-719, 2017.
- Zhao, L., Xiao, H., Dong, Z., Xiao, S., Zhou, M., Cheng, G., Yin, L., and Yin, Z.: Origins of groundwater inferred from isotopic patterns of the Badain Jaran Desert, Northwestern China. *Ground Water*, 50, 715-725, 2012.
- Zhen, Z., Li, C., Li, W., Hu, Q., Liu, X., Liu, Z., and Yu, R.: Characteristics of environmental isotopes of surface water and groundwater and their recharge relationships in Lake Dali basin. *Journal of Lake Sciences*, 26, 916-922, 2014 (in Chinese).
- Zhu, B.Q., Yu, J.J., Rioual, P., Gao, Y., Zhang, Y.C., and Xiong, H.G.: Climate effects on recharge and evolution of natural water resources in middle-latitude watersheds under arid climate. In: Ramkumar, M. U., Kumaraswamy, K, and Mohanraj, R. (Eds.), *Environmental Management of River Basin Ecosystems*. Springer Earth System Sciences, Springer-Verlag, Heidelberg, pp. 91-109, 2015.
- Zhu, B.Q., Wang, X.M., and Rioual, P.: Multivariate indications between environment and ground water recharge in a sedimentary drainage basin in northwestern China. *Journal of Hydrology*, 2017, 549, 92-113, 2017.
- Zhu, G.F., Li, Z.Z., Su, Y.H., Ma, J.Z., and Zhang, Y.Y.: Hydrogeochemical and isotope evidence of groundwater evolution and recharge in Minqin Basin, Northwest China. *Journal of Hydrology*, 333, 239-251, 2007.
- Zhu, G.F., Su, Y.H., and Feng, Q.: The hydrochemical characteristics and evolution of groundwater and surface water in the Heihe River Basin, northwest China. *Hydrogeology Journal*, 16, 167-182, 2008.
- Zhu, Z., Wu, Z., Liu, S., and Di, X.: *An Outline of Chinese Deserts*. Science Press, Beijing, 1980 (in Chinese).

**Figure Captions:**

**Fig. 1.** The Geographical location of the Otindag Desert in northern China. (a) The study area shown at a large scale, and (b) the study area shown at a smaller scale, with detailed information about the boundary and tectonic settings of the desert land. 1, the palaeo lake area of the megalake Dali; 2, the boundary of the Otindag; 3, the modern lake area; 4, the boundary of Fig. 2; 5, the boundary between the westerlies and the East Asian Summer Monsoon (EASM) climate systems. ①, the Xilamulun River. ②, the Gonggeer River. ③, the Shepi River. ④, the Tuligen River. The boundary between the westerlies and the EASMin (a) and (b) is modified from Chen et al. (2010). The palaeo lake area of the megalake Dali and the palaeo channel in (b) is modified from Yang et al. (2015). The location of the Xar Moron Fault is referenced from Eizenhöfer et al. (2014). Section S1 is an elevation section starting from the upstream of the Dali Lake and ending with a spring sample (s2) in the riverhead of Xilamulun River.

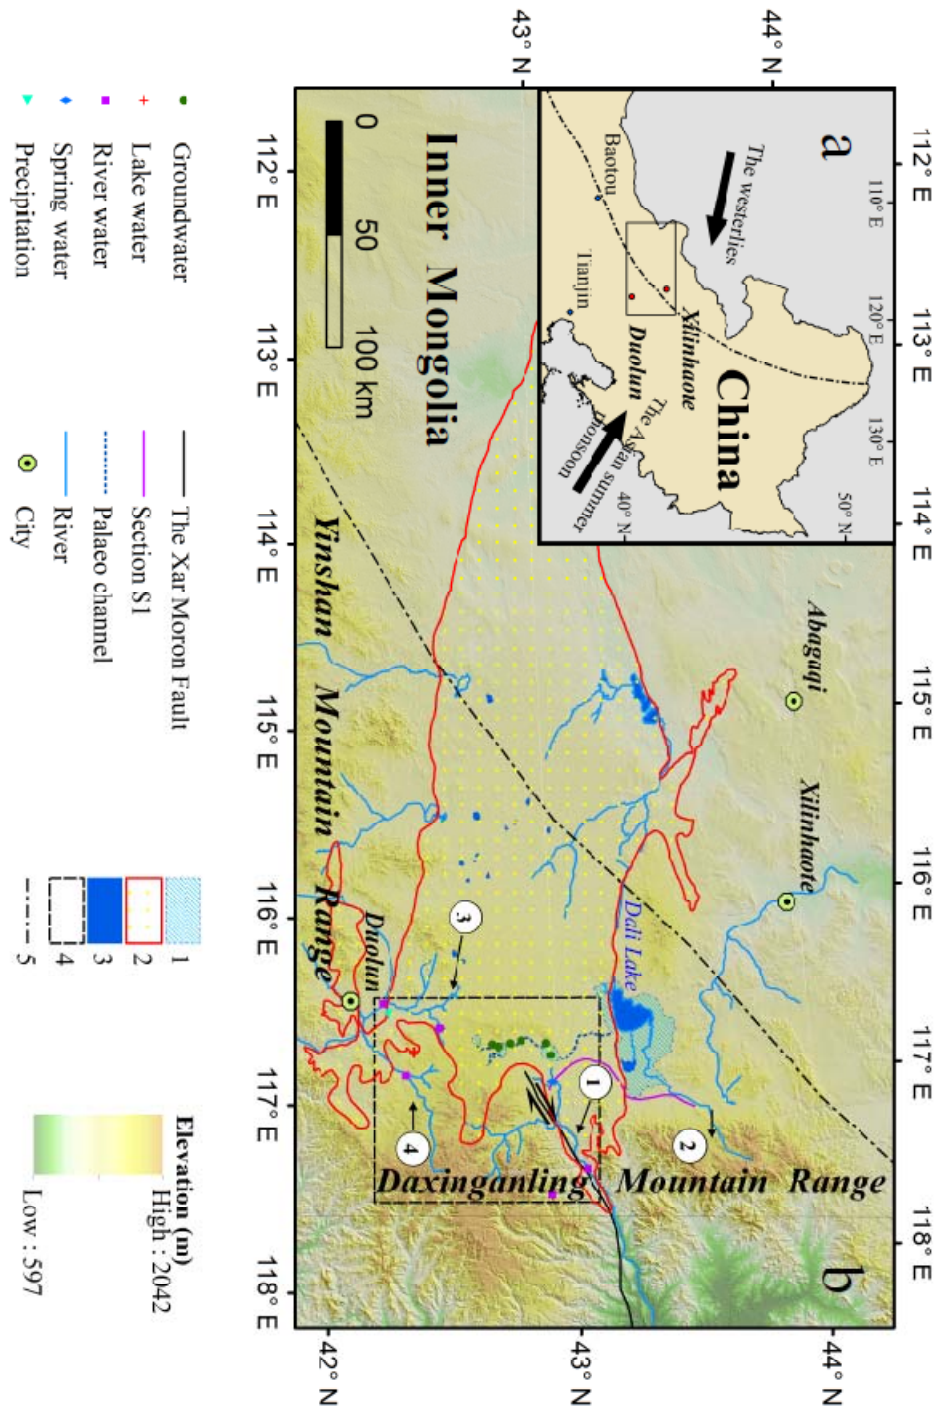

**Fig. 2.** (a) Tectonic framework of the north China-Mongolian segment of the Central Asian Orogenic Belt (modified after Jahn, 2004). (b) Geological sketch map of the northern China-Mongolia tract (modified after Jian et al., 2010). The Solonker suture zone represents the tectonic boundary between the northern (Hutag Uul Block-Northern orogen) and the southern (southern orogen-Northern margin of North China craton) continental blocks. Note that the red line marks the early Permian paleobiogeographical boundary (Wang and Liu, 1986; Li, 2006), which coincides with the northern boundary of the suture zone.

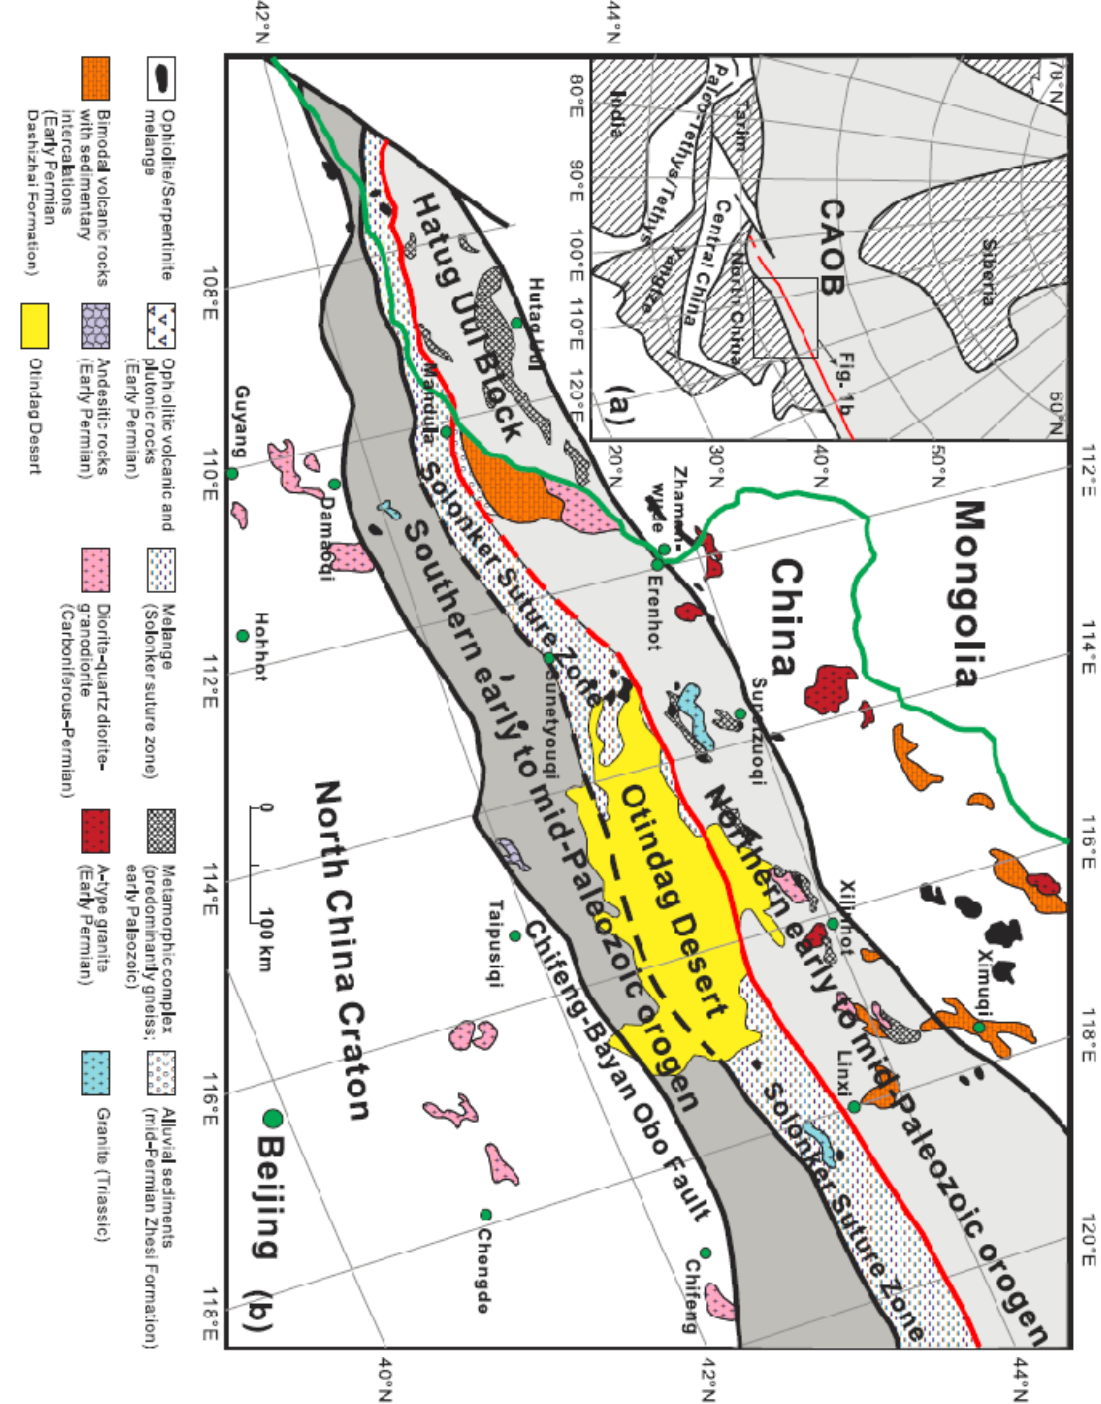



731 **Fig. 3.** The hydrogeological division map of the Otindag Desert.

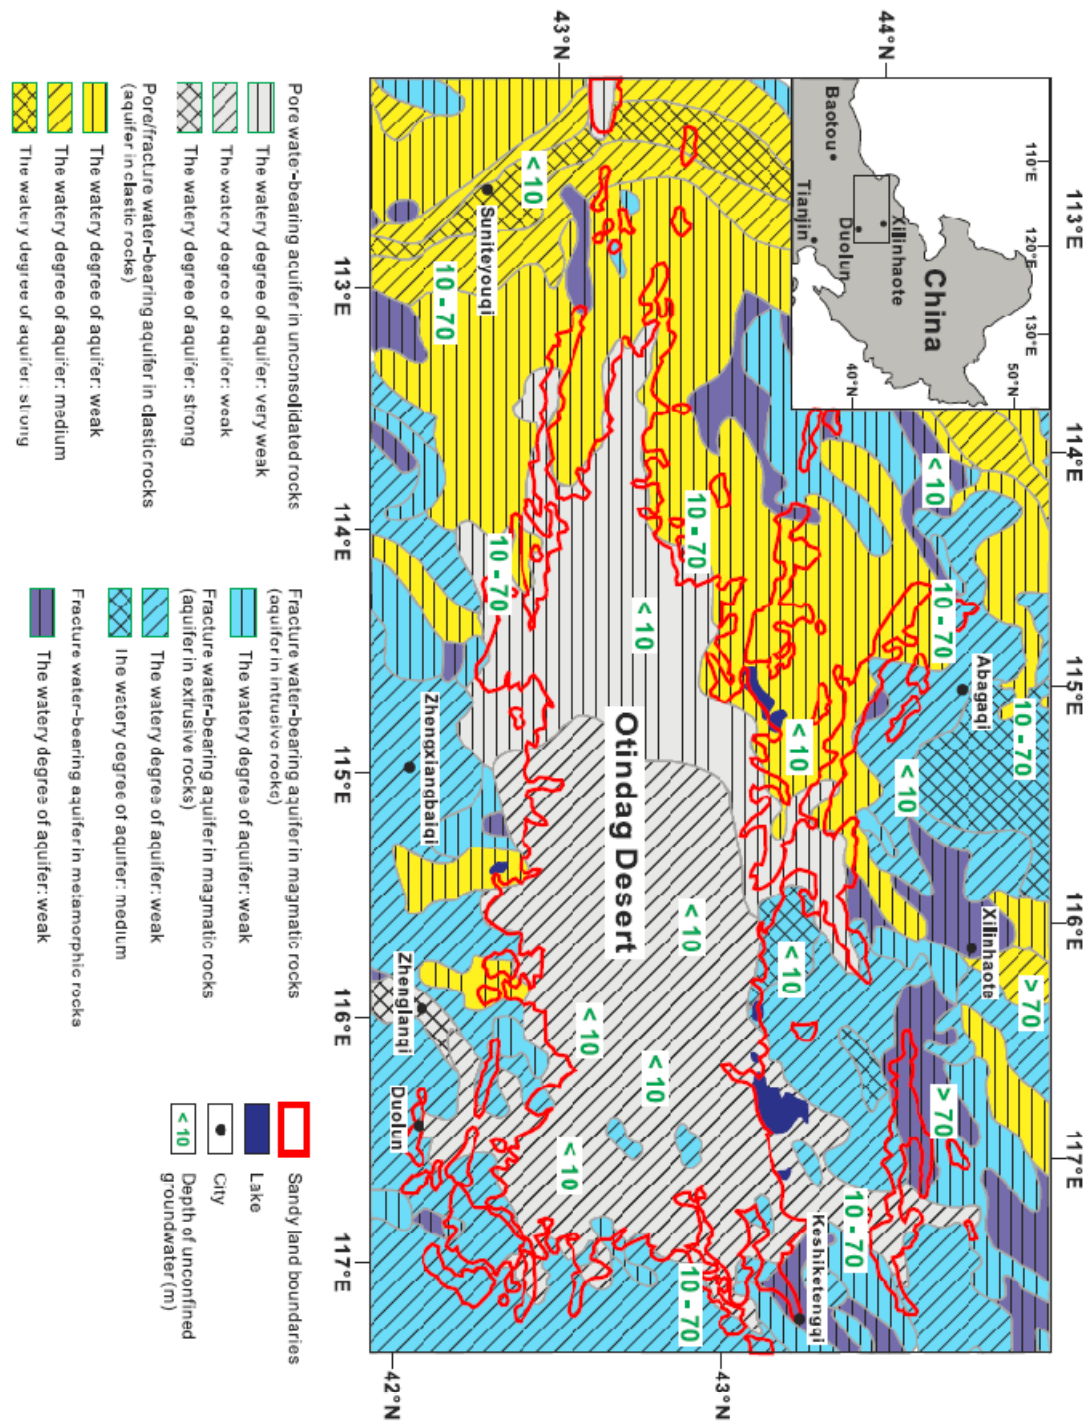

**Fig. 4.** The locations of the water sampling sites in this study.

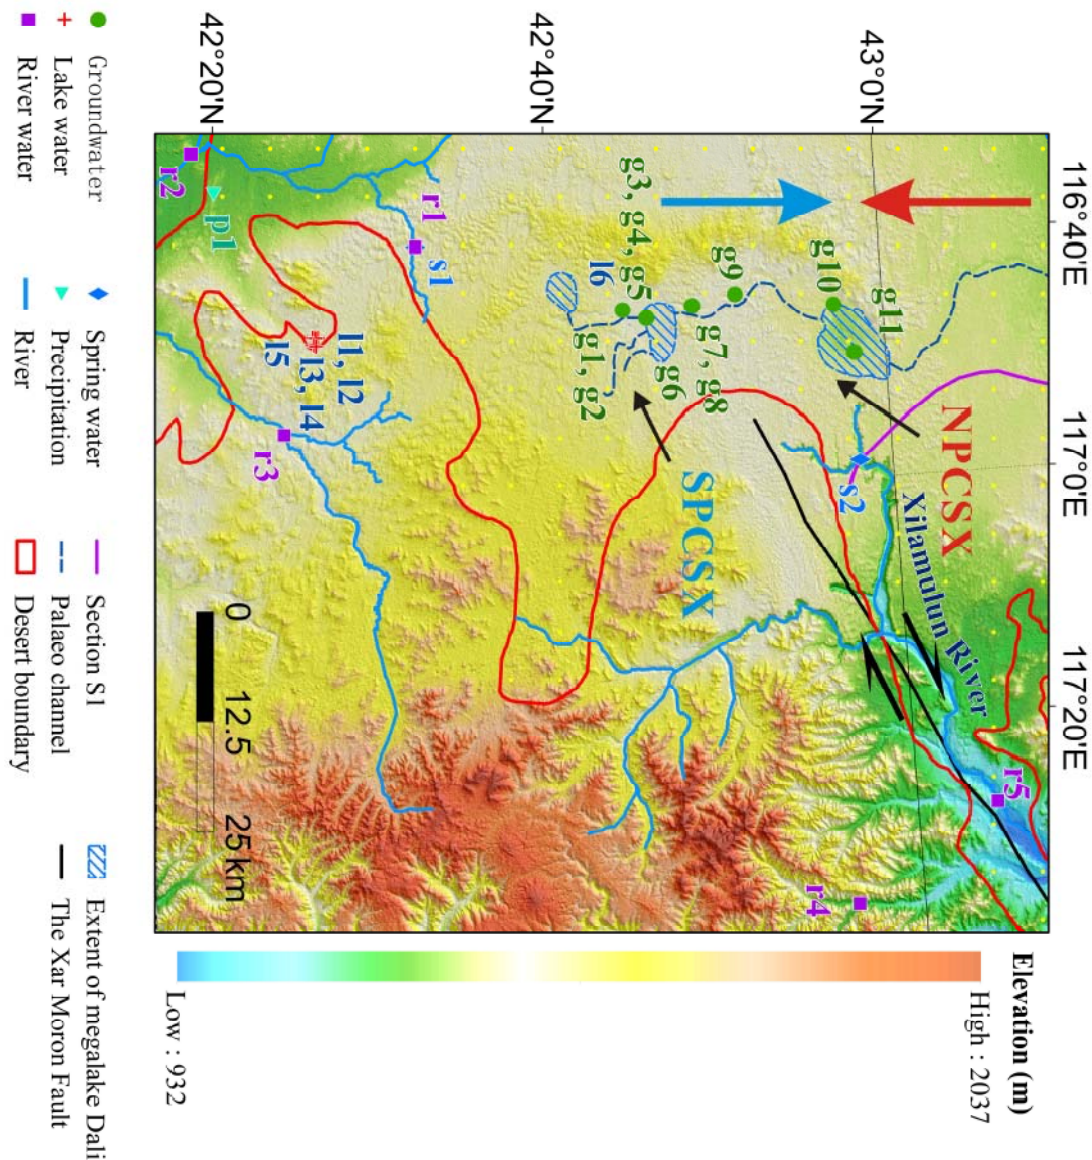



**Fig. 5.** The fingerprint diagram showing the variations of multiple ions' concentrations in the studied water samples in an equivalent unit. The  $\text{HCO}_3+\text{CO}_3$  concentration in the sample p1 was not shown, due to its value being lower than the detection limit.

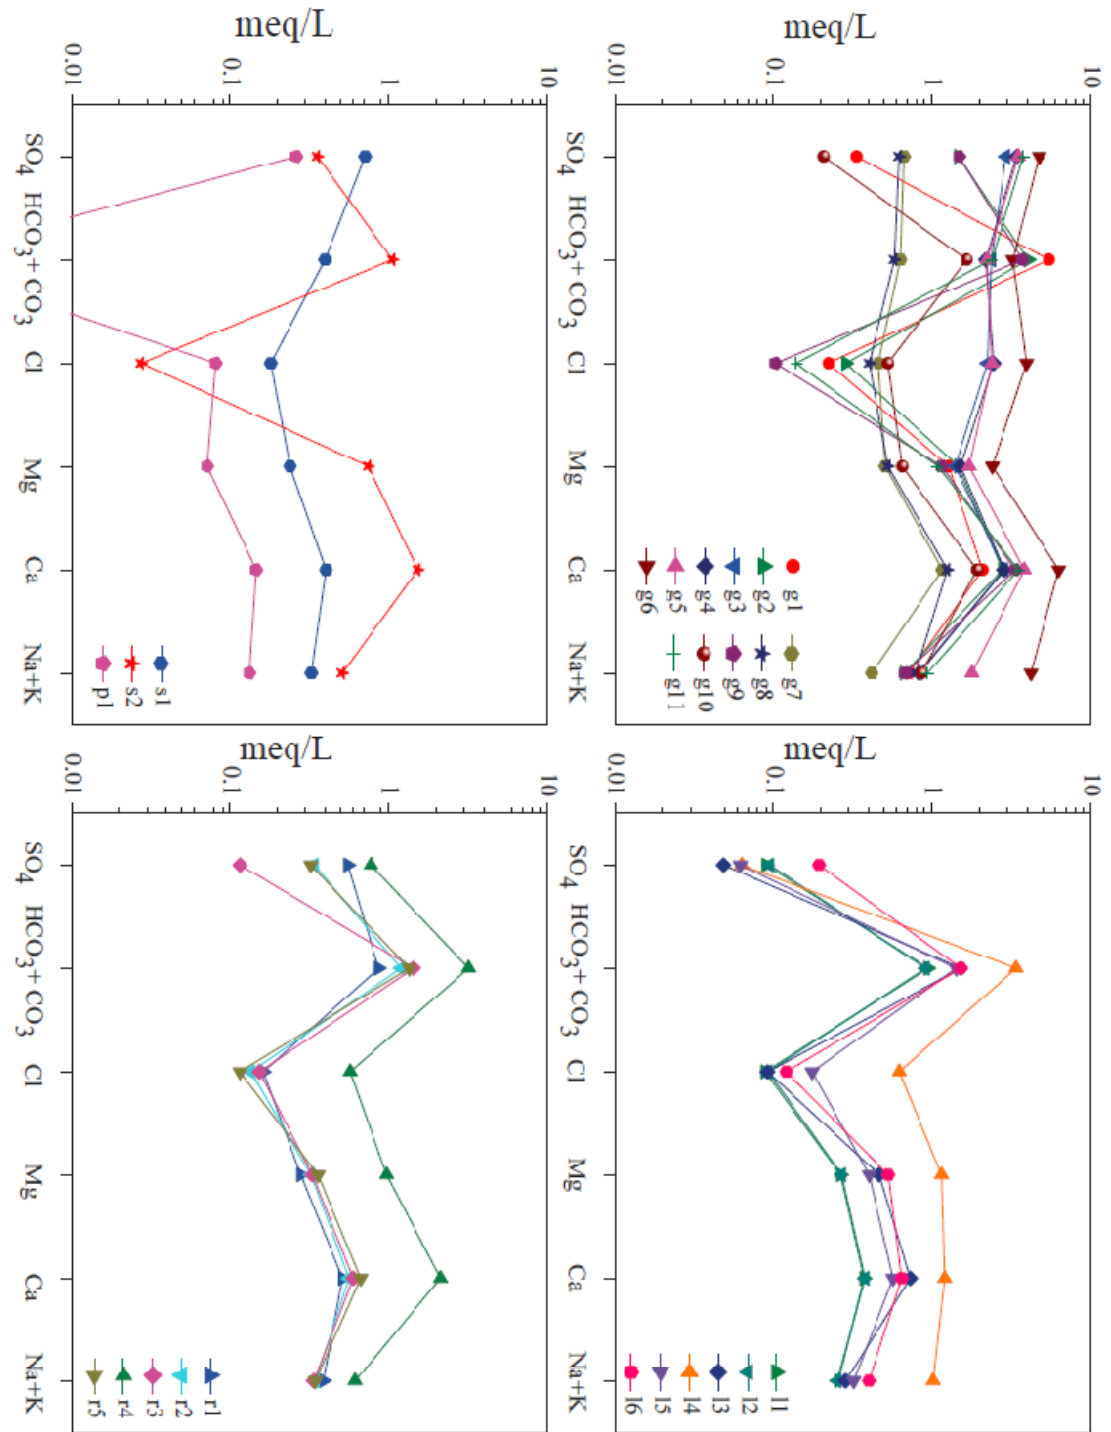

**Fig. 6.** The Piper diagram showing the relative abundances of major cations and anions in the studied water samples. Major water types are also shown in this diagram.

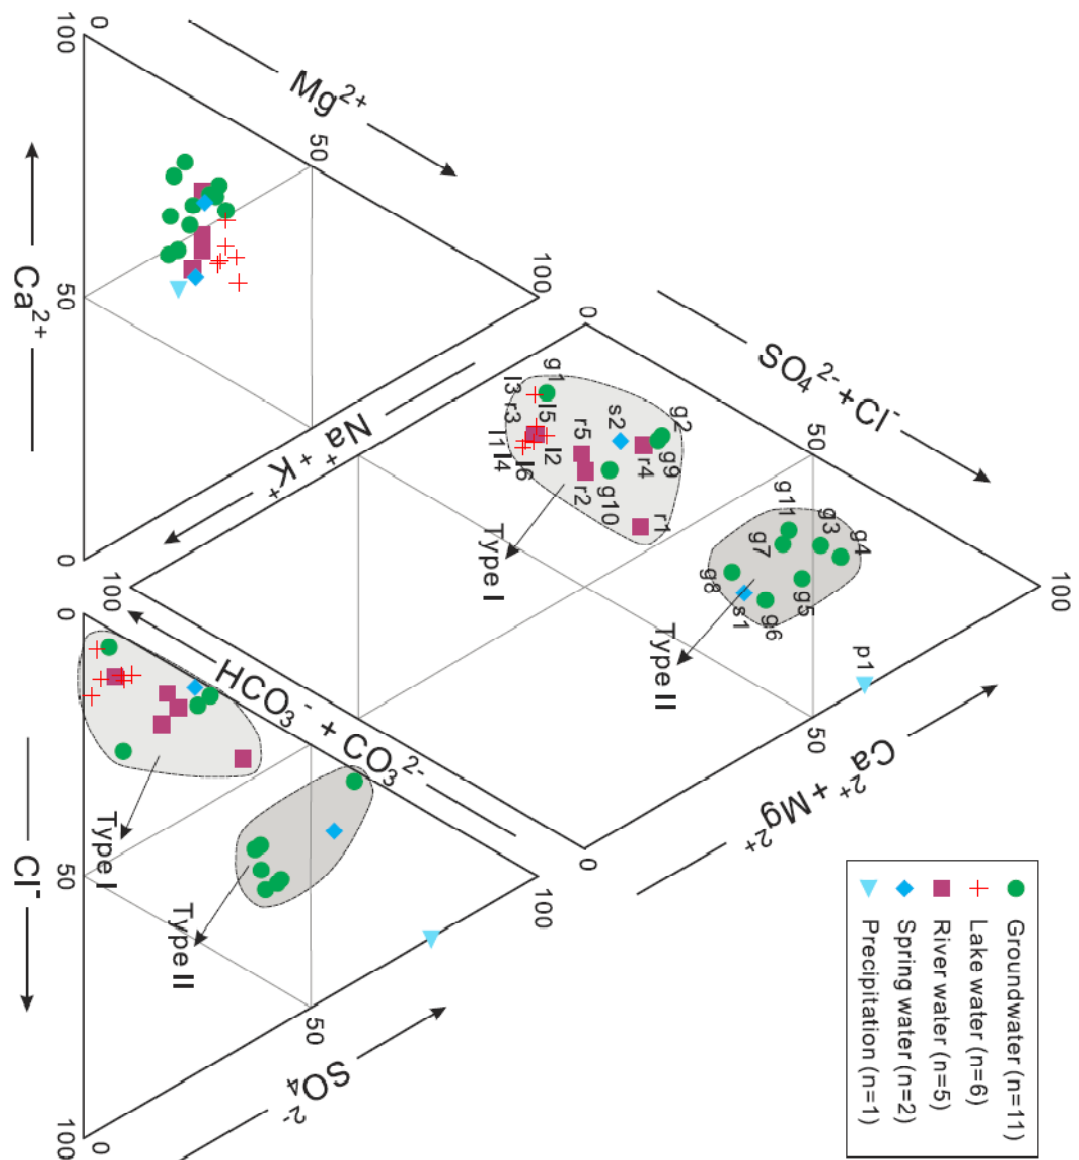

**Fig. 7.** The bivariate diagram of  $\delta D$  and  $\delta^{18}O$ , i.e. the Craig diagram, for the natural water samples in this study. Different relationships between the groundwaters, lake waters, river waters, spring waters and the precipitation waters are illustrated. AWMB, the annual weighted mean value at the Baotou station; AWMT, the annual weighted mean value at the Tianjin station; LWMB, the long-term weighted means at the Baotou station; LWMT, the long-term weighted means at the Tianjin station; GMWL, the Global Meteoric Water Line; LMWL-B, the local meteoric water line calculated based on the data from the Baotou station; LMWL-T, the local meteoric water line calculated based on the data from the Tianjin station; EL1, the evaporation line calculated based on the data of water samples collected in this study.

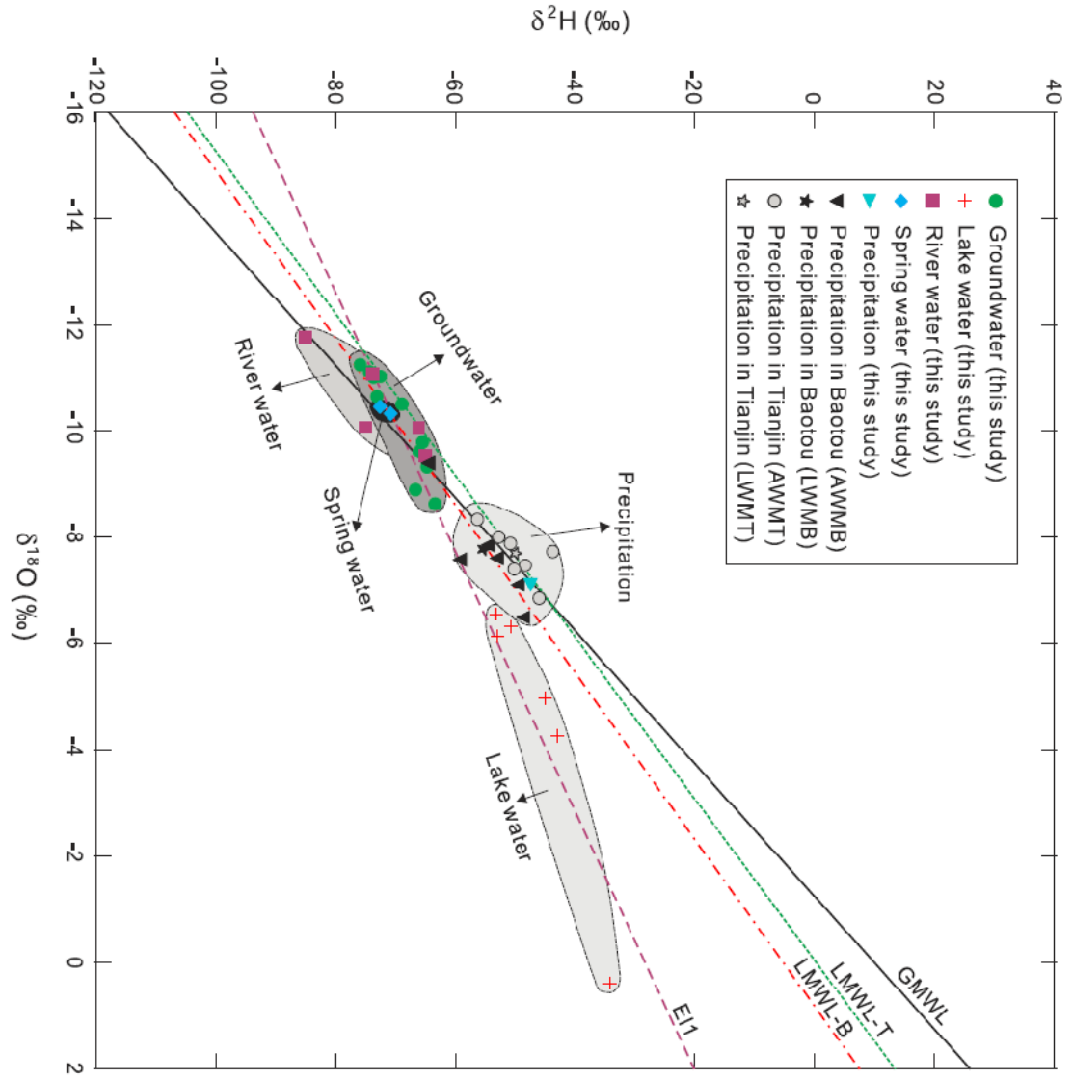

**Fig. 8.** The seasonal mean distributions of (a) precipitation, (b) surface air temperature and (c) water vapor pressure from the Baotou and Tianjin weather stations (station sites seen in **Fig. 1a**) in the surrounding areas of the Otindag for the period 1981-2010. The seasonal mean distributions of (d)  $\delta^{18}\text{O}$  and (e)  $\delta^2\text{H}$  values in precipitation from the Baotou and Tianjin weather stations in the surrounding areas of the Otindag for the period 1986-2001.

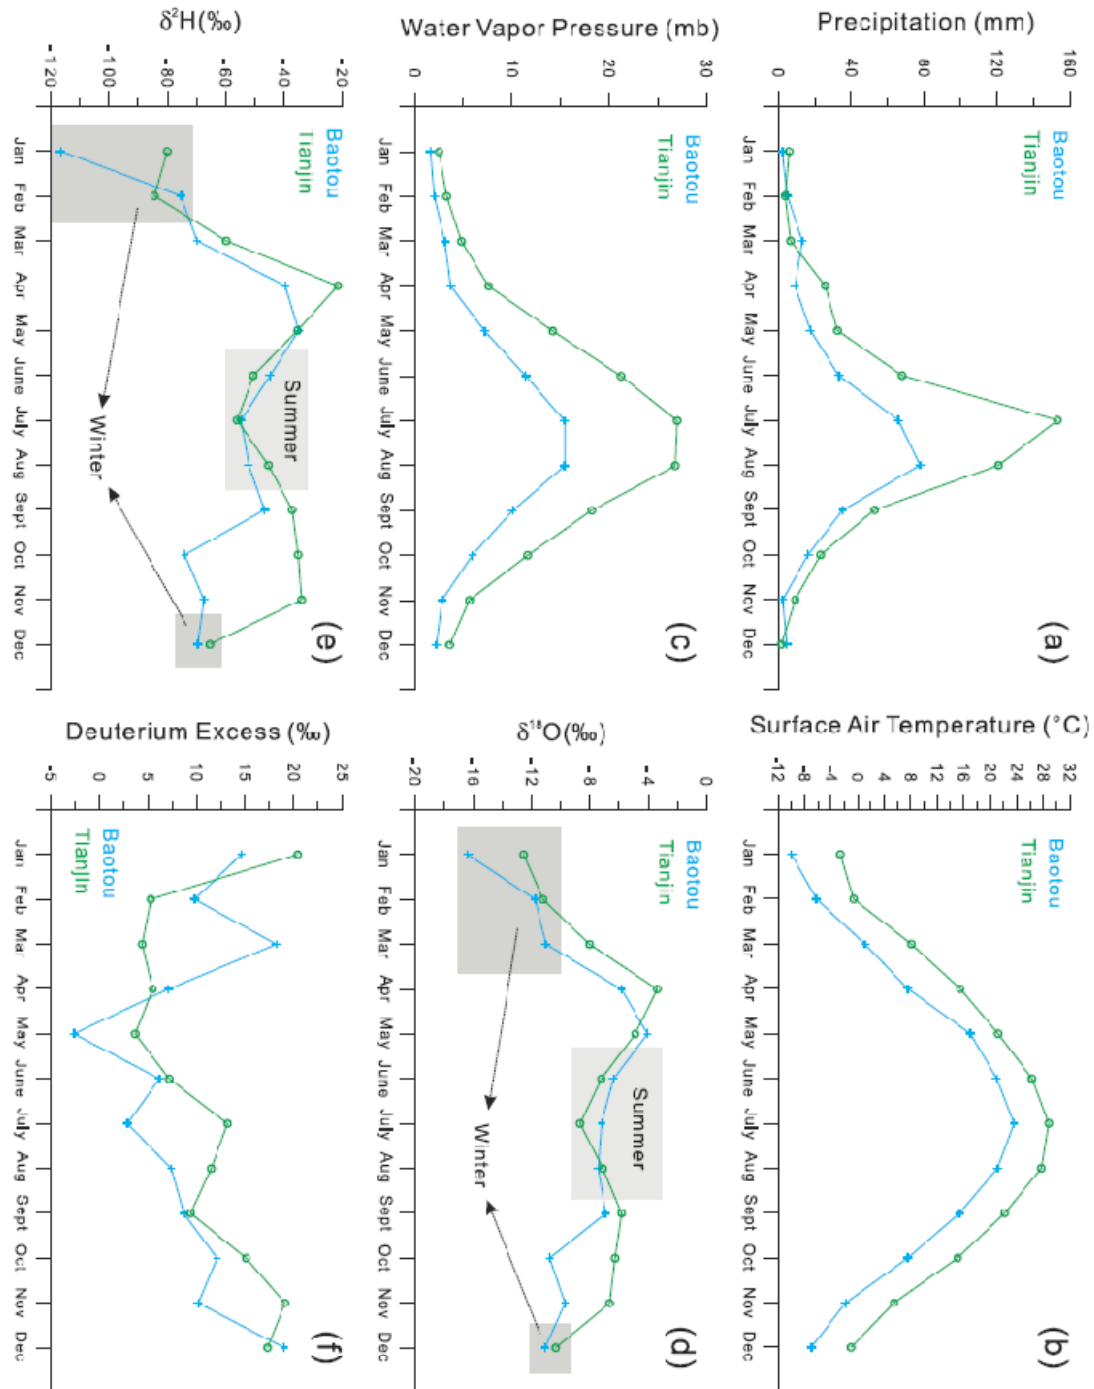

**Fig. 9.** The bivariate diagram of  $\delta D$  and  $\delta^{18}O$ , i.e. the Craig diagram, for the natural water samples collected in the Otindag (this study) and the Dali Basin. Different relationships between the groundwaters, lake waters, river waters, spring waters and the precipitation waters are clearly illustrated. AWMB, AWMT, LWMB, LWMT, GMWL, LMWL-B, LWML-T, and EL1 are the same as in Fig. 7. EL2, the evaporation line calculated based on the data from the groundwater, lake water, river water and spring water samples collected from the Otindag and Dali Basin. The data for the Dali were taken from Chen et al. (2008) and Zhen et al. (2014).

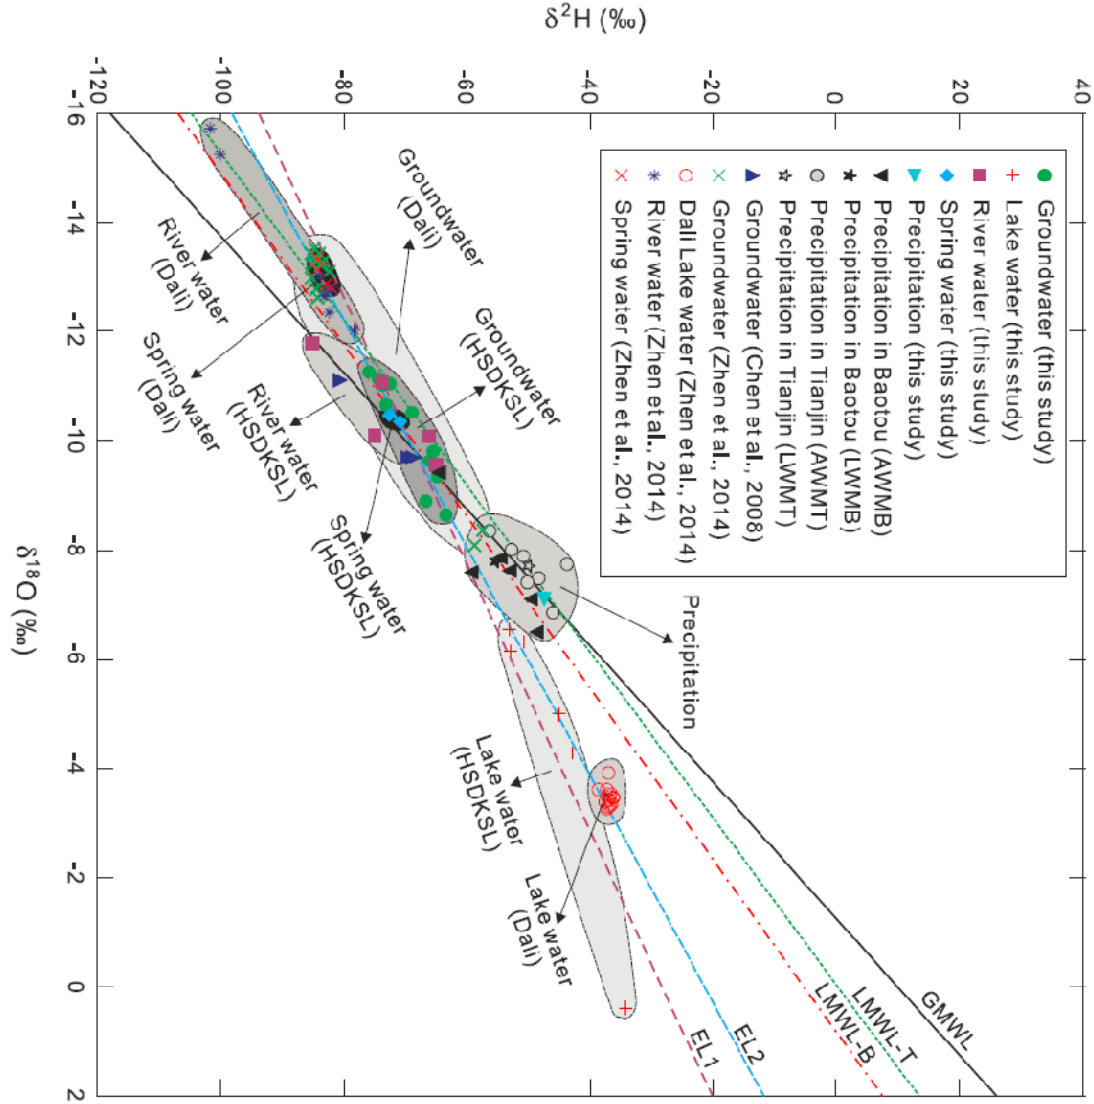

**Fig. 10.** (a) Sketch map showing the relationship between the groundwaters in the NPCSX and SPCSX areas, based on variations of (a) the chloride concentrations, (b) the TDS concentrations, (c) the  $\delta^{18}\text{O}$  values and (d) the  $\delta\text{D}$  values of these water samples versus their distances away from the water sample g1 along the palaeo river channel (PCSX) from south to north. The dashed line in (c) and (d) represents the corresponding values of the spring water sample s2, and divides samples into the NPCSX and SPCSX parts. (e) Variations of tritium contents vs. deuterium excess for the groundwater samples in the study area. The sample g6 was omitted due to its potential contamination.

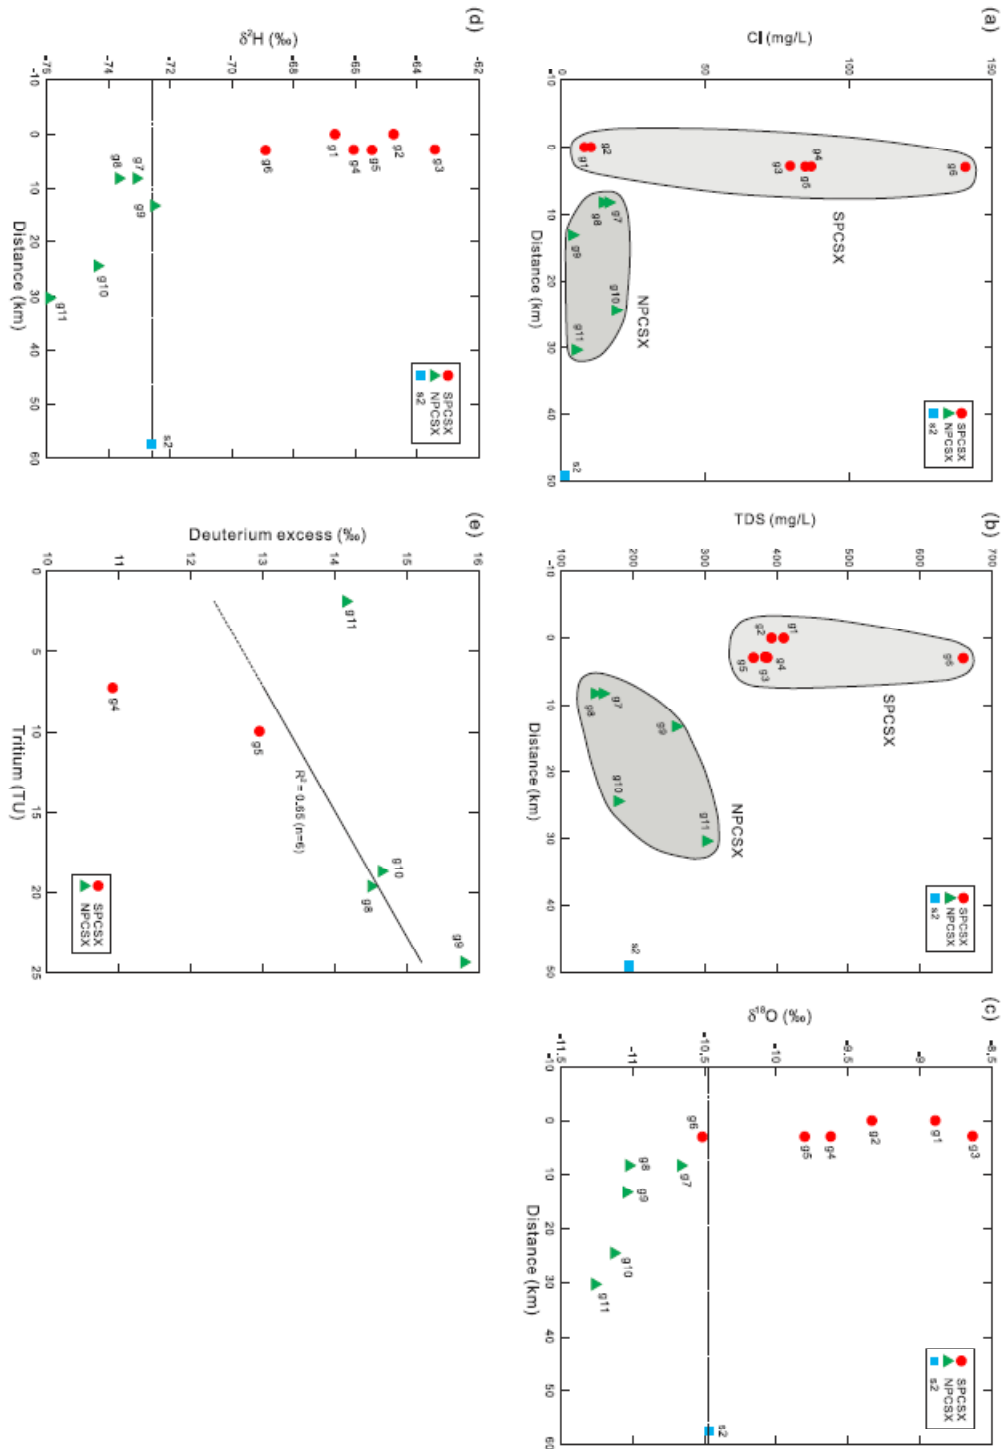

**Fig. 11.** Variation of the topographical elevation along the section S1 (see Fig. 1b) from the upstream of the Dali Lake to the location site of the spring water sample (s2) in the riverhead of the Xilamulun River. Note that no river water samples are shown in this figure.

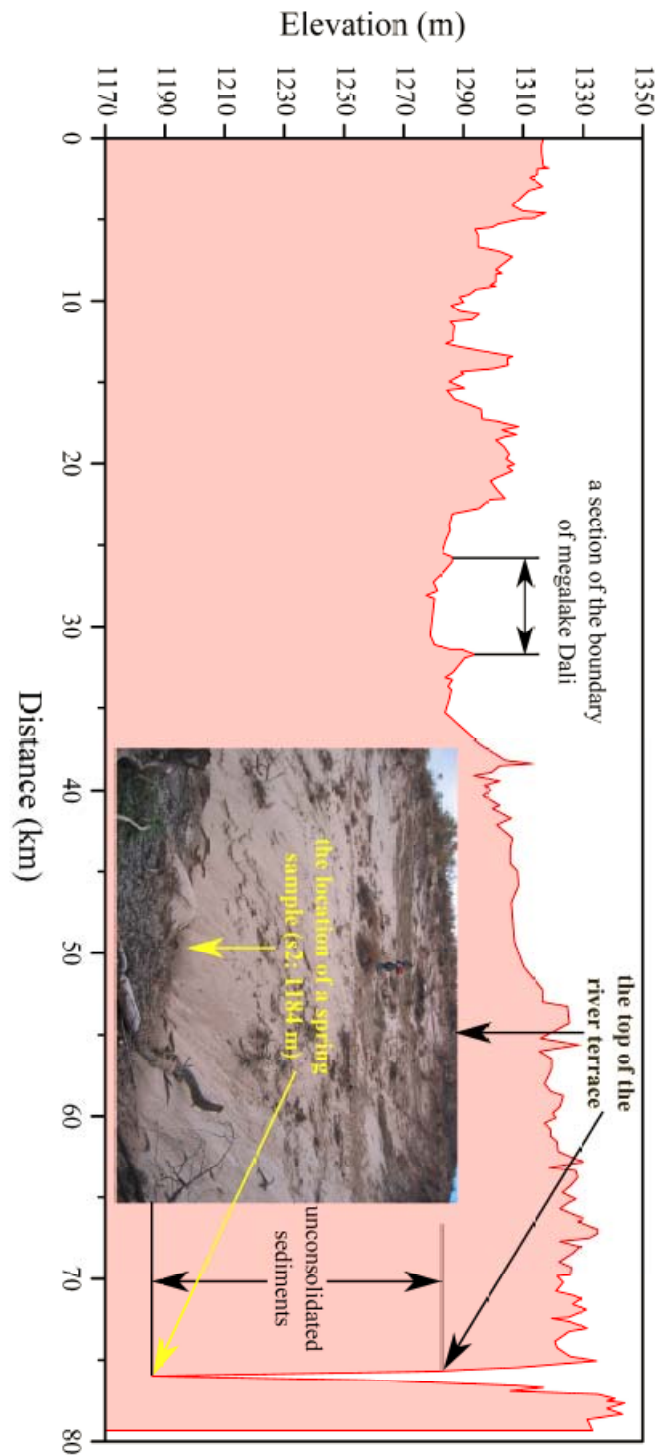

884  
885

**Table Captions:**

**Table 1.** The physical parameters measured for the natural water samples in the study area.

| Sample ID | Water type    | Latitude (N, degree) | Longitude (E, degree) | Elevation (m a.s.l) | Depth (m) | Temperature (°C) | pH   | Eh (mV) | EC (µS/cm) | TDS (mg/L) | Salinity (%) | Alkalinity (meq/L) | Hardness (°dH) |
|-----------|---------------|----------------------|-----------------------|---------------------|-----------|------------------|------|---------|------------|------------|--------------|--------------------|----------------|
| g1        | Groundwater   | 42.736306            | 116.747333            | 1396                | 12        | 5.8              | 6.72 | 3       | 769        | 410        | 0.6          | 5.47               | 9.42           |
| g2        | Groundwater   | 42.736306            | 116.747333            | 1396                | 26        | 6.0              | 6.91 | -10     | 736        | 393        | 0.5          | 4.07               | 11.96          |
| g3        | Groundwater   | 42.760194            | 116.760139            | 1355                | 32        | 7.7              | 6.88 | -6      | 725        | 384        | 0.5          | 2.39               | 11.94          |
| g4        | Groundwater   | 42.759694            | 116.760417            | 1360                | 7         | 10.0             | 6.74 | 1       | 725        | 387        | 0.5          | 2.20               | 12.28          |
| g5        | Groundwater   | 42.759556            | 116.760556            | 1362                | 27        | 7.6              | 6.46 | 16      | 691        | 368        | 0.5          | 2.23               | 15.57          |
| g6        | Groundwater   | 42.760111            | 116.760250            | 1365                | 7         | 10.3             | 6.26 | 22      | 1240       | 660        | 0.8          | 3.25               | 24.45          |
| g7        | Groundwater   | 42.806361            | 116.747806            | 1352                | 20        | 6.8              | 6.71 | 2       | 297        | 158        | 0.2          | 0.63               | 4.70           |
| g8        | Groundwater   | 42.806361            | 116.747806            | 1352                | 16        | 6.5              | 6.92 | -8      | 276        | 147        | 0.2          | 0.58               | 5.00           |
| g9        | Groundwater   | 42.850333            | 116.735722            | 1347                | 30        | 7.2              | 6.74 | -1      | 487        | 260        | 0.4          | 3.73               | 12.68          |
| g10       | Groundwater   | 42.949861            | 116.759194            | 1321                | 37        | 9.9              | 6.75 | -2      | 337        | 179        | 0.2          | 1.66               | 7.23           |
| g11       | Groundwater   | 42.967111            | 116.827528            | 1317                | 60        | 8.6              | 6.99 | -14     | 571        | 302        | 0.4          | 2.40               | 12.94          |
| l1        | Lake water    | 42.424611            | 116.769194            | 1368                | /         | 16.9             | 9.44 | -151    | 126        | 67         | 0.1          | 0.95               | 1.79           |
| l2        | Lake water    | 42.424611            | 116.769194            | 1368                | /         | 19.6             | 9.18 | -137    | 132        | 70         | 0.1          | 0.92               | 1.82           |
| l3        | Lake water    | 42.424611            | 116.757806            | 1365                | /         | 20.2             | 7.38 | -36     | 196        | 105        | 0.1          | 1.53               | 3.36           |
| l4        | Lake water    | 42.427083            | 116.757639            | 1366                | /         | 20.5             | 7.87 | -64     | 448        | 238        | 0.2          | 3.42               | 6.61           |
| l5        | Lake water    | 42.421806            | 116.756917            | 1360                | /         | 20.1             | 8.23 | -83     | 173        | 92         | 0.1          | 1.43               | 2.73           |
| l6        | Lake water    | 42.736389            | 116.747222            | 1374                | /         | 10.7             | 8.35 | -89     | 194        | 103        | 0.1          | 1.53               | 3.30           |
| r1        | River water   | 42.530917            | 116.641250            | 1355                | /         | 20.6             | 7.31 | -33     | 180        | 96         | 0.1          | 0.88               | 2.23           |
| r2        | River water   | 42.310883            | 116.494817            | 1231                | /         | 14.9             | 7.67 | -52     | 178        | 95         | 0.1          | 1.21               | 2.50           |
| r3        | River water   | 42.385778            | 116.886194            | 1362                | /         | 9.5              | 7.62 | -48     | 177        | 94         | 0.1          | 1.45               | 2.62           |
| r4        | River water   | 42.931417            | 117.585306            | 1217                | /         | 10.5             | 7.97 | -69     | 474        | 252        | 0.3          | 3.22               | 8.73           |
| r5        | River water   | 43.079083            | 117.457389            | 1006                | /         | 12.9             | 7.87 | -62     | 191        | 101        | 0.1          | 1.37               | 2.88           |
| s1        | Spring water  | 42.530917            | 116.641250            | 1359                | /         | 20.9             | 6.63 | 5       | 165        | 88         | 0.1          | 0.40               | 1.81           |
| s2        | Spring water  | 42.965417            | 116.975361            | 1184                | /         | 19.0             | 7.47 | -46     | 371        | 195        | 0.2          | 1.07               | 6.40           |
| p1        | Precipitation | 42.330750            | 116.551694            | 1260                | /         | 20.2             | 4.61 | 109     | 78         | 42         | 0.0          | /                  | 0.61           |

886  
887

**Table 2.** The concentrations of major cations and anions measured for the water samples in the study area.



| Sample | F <sup>-</sup><br>(mg/L) | Cl <sup>-</sup><br>(mg/L) | NO <sub>2</sub> <sup>-</sup><br>(mg/L) | NO <sub>3</sub> <sup>-</sup><br>(mg/L) | SO <sub>4</sub> <sup>2-</sup><br>(mg/L) | CO <sub>3</sub> <sup>2-</sup><br>(mg/L) | HCO <sub>3</sub> <sup>-</sup><br>(mg/L) | Li <sup>+</sup><br>(mg/L) | Na <sup>+</sup><br>(mg/L) | NH <sub>4</sub> <sup>+</sup><br>(mg/L) | K <sup>+</sup><br>(mg/L) | Mg <sup>2+</sup><br>(mg/L) | Ca <sup>2+</sup><br>(mg/L) |
|--------|--------------------------|---------------------------|----------------------------------------|----------------------------------------|-----------------------------------------|-----------------------------------------|-----------------------------------------|---------------------------|---------------------------|----------------------------------------|--------------------------|----------------------------|----------------------------|
| g1     | 0.13                     | 7.90                      | 2.32                                   | 0.48                                   | 16.10                                   | 0.00                                    | 334.60                                  | 0.02                      | 13.79                     | 10.54                                  | 4.59                     | 15.52                      | 41.81                      |
| g2     | 0.21                     | 10.21                     | 0.00                                   | 6.15                                   | 70.61                                   | 0.10                                    | 247.70                                  | 0.02                      | 13.36                     | 6.56                                   | 3.45                     | 17.91                      | 56.04                      |
| g3     | 0.11                     | 79.56                     | 0.00                                   | 0.00                                   | 140.76                                  | 0.00                                    | 145.40                                  | 0.01                      | 17.92                     | 2.28                                   | 1.76                     | 17.06                      | 57.29                      |
| g4     | 0.10                     | 86.90                     | 0.00                                   | 5.73                                   | 164.80                                  | 0.00                                    | 133.70                                  | 0.02                      | 18.02                     | 0.00                                   | 2.02                     | 18.50                      | 57.32                      |
| g5     | 0.07                     | 84.82                     | 0.00                                   | 0.76                                   | 169.30                                  | 0.00                                    | 136.20                                  | 0.00                      | 39.68                     | 1.02                                   | 2.72                     | 20.94                      | 76.86                      |
| g6     | 0.07                     | 140.54                    | 0.00                                   | 110.77                                 | 228.80                                  | 0.00                                    | 198.20                                  | 0.00                      | 79.80                     | 0.00                                   | 29.47                    | 29.25                      | 126.68                     |
| g7     | 0.37                     | 16.31                     | 0.00                                   | 306.31                                 | 32.01                                   | 0.00                                    | 38.70                                   | 0.06                      | 7.83                      | 0.00                                   | 3.09                     | 6.21                       | 23.37                      |
| g8     | 0.29                     | 14.28                     | 0.00                                   | 35.49                                  | 29.89                                   | 0.00                                    | 35.50                                   | 0.02                      | 16.21                     | 0.11                                   | 3.38                     | 6.44                       | 25.14                      |
| g9     | 0.10                     | 3.66                      | 0.15                                   | 1.19                                   | 71.56                                   | 0.00                                    | 227.40                                  | 0.06                      | 12.92                     | 0.55                                   | 4.50                     | 14.06                      | 67.52                      |
| g10    | 0.24                     | 18.80                     | 0.00                                   | 49.49                                  | 9.97                                    | 0.00                                    | 101.10                                  | 0.00                      | 18.54                     | 0.00                                   | 2.09                     | 7.92                       | 38.68                      |
| g11    | 0.28                     | 4.94                      | 0.00                                   | 0.00                                   | 181.53                                  | 0.00                                    | 146.20                                  | 0.05                      | 20.40                     | 2.59                                   | 2.06                     | 13.30                      | 70.59                      |
| l1     | 0.16                     | 3.15                      | 0.00                                   | 0.07                                   | 4.32                                    | 0.00                                    | 57.90                                   | 0.01                      | 5.42                      | 0.00                                   | 0.86                     | 3.24                       | 7.49                       |
| l2     | 0.16                     | 3.30                      | 0.00                                   | 1.66                                   | 4.57                                    | 0.00                                    | 55.80                                   | 0.00                      | 5.33                      | 0.00                                   | 0.84                     | 3.29                       | 7.61                       |
| l3     | 0.11                     | 3.27                      | 0.00                                   | 0.61                                   | 2.33                                    | 0.00                                    | 93.30                                   | 0.01                      | 5.88                      | 0.00                                   | 1.19                     | 5.68                       | 14.66                      |
| l4     | 0.17                     | 22.12                     | 0.00                                   | 0.39                                   | 3.04                                    | 0.10                                    | 207.60                                  | 0.00                      | 9.21                      | 0.70                                   | 24.21                    | 14.02                      | 24.18                      |
| l5     | 0.09                     | 6.24                      | 0.00                                   | 0.65                                   | 2.97                                    | 0.10                                    | 86.80                                   | 0.01                      | 6.72                      | 0.00                                   | 1.16                     | 4.91                       | 11.41                      |
| l6     | 0.18                     | 4.29                      | 0.00                                   | 0.80                                   | 9.34                                    | 0.10                                    | 93.00                                   | 0.01                      | 8.41                      | 0.00                                   | 1.36                     | 6.47                       | 12.95                      |
| r1     | 0.30                     | 5.76                      | 0.00                                   | 2.38                                   | 26.67                                   | 0.30                                    | 52.40                                   | 0.01                      | 7.15                      | 0.00                                   | 2.99                     | 3.41                       | 10.34                      |
| r2     | 0.19                     | 4.82                      | 0.00                                   | 0.65                                   | 16.40                                   | 0.10                                    | 73.10                                   | 0.01                      | 6.82                      | 0.00                                   | 1.92                     | 3.96                       | 11.36                      |
| r3     | 0.64                     | 5.46                      | 0.00                                   | 0.43                                   | 5.57                                    | 0.00                                    | 88.10                                   | 0.01                      | 7.11                      | 0.00                                   | 1.13                     | 4.04                       | 12.06                      |
| r4     | 1.08                     | 20.39                     | 0.00                                   | 19.27                                  | 37.25                                   | 0.50                                    | 195.00                                  | 0.01                      | 13.02                     | 0.00                                   | 1.96                     | 11.90                      | 42.81                      |
| r5     | 0.19                     | 4.10                      | 0.00                                   | 1.08                                   | 15.57                                   | 0.00                                    | 82.60                                   | 0.01                      | 6.71                      | 0.00                                   | 2.08                     | 4.38                       | 13.40                      |
| s1     | 0.16                     | 6.44                      | 0.00                                   | 1.95                                   | 34.25                                   | 0.00                                    | 24.30                                   | 0.02                      | 6.56                      | 0.00                                   | 1.62                     | 2.92                       | 8.10                       |
| s2     | 0.05                     | 0.98                      | 0.00                                   | 0.45                                   | 17.15                                   | 0.00                                    | 64.90                                   | 0.02                      | 9.87                      | 0.00                                   | 3.32                     | 9.10                       | 30.79                      |
| p1     | 0.61                     | 2.90                      | 0.00                                   | 9.46                                   | 12.65                                   | 0.00                                    | 0.00                                    | 0.00                      | 2.09                      | 2.07                                   | 1.64                     | 0.88                       | 2.95                       |

**Table 3.** The analytical data of stable and radioactive isotopes measured for the water samples in this study.

| Sample ID | $\delta D$ (‰) | $\sigma$ ‰ | $\delta^{18}O$ (‰) | $\sigma$ ‰ | deuterium excess (d) | Tritium ( $^3H$ ) (TU) |
|-----------|----------------|------------|--------------------|------------|----------------------|------------------------|
| g1        | -66.664        | 0.199      | -8.895             | 0.026      | 4.496                | /                      |
| g2        | -64.758        | 0.291      | -9.336             | 0.039      | 9.930                | /                      |
| g3        | -63.424        | 0.269      | -8.635             | 0.008      | 5.656                | /                      |
| g4        | -66.055        | 0.149      | -9.621             | 0.062      | 10.913               | 7.250                  |
| g5        | -65.462        | 0.111      | -9.802             | 0.027      | 12.954               | 9.975                  |
| g6        | -68.913        | 0.287      | -10.514            | 0.039      | 15.199               | 22.908                 |
| g7        | -73.105        | 0.298      | -10.662            | 0.041      | 12.191               | /                      |
| g8        | -73.676        | 0.220      | -11.023            | 0.037      | 14.508               | 19.611                 |
| g9        | -72.530        | 0.181      | -11.041            | 0.015      | 15.798               | 24.345                 |
| g10       | -74.362        | 0.201      | -11.127            | 0.026      | 14.654               | 18.681                 |
| g11       | -75.924        | 0.340      | -11.260            | 0.015      | 14.156               | 1.860                  |
| l1        | -53.128        | 0.229      | -6.553             | 0.002      | -0.704               | /                      |
| l2        | -50.721        | 0.304      | -6.320             | 0.026      | -0.161               | /                      |
| l3        | -42.877        | 0.239      | -4.292             | 0.034      | -8.545               | /                      |
| l4        | -34.155        | 0.243      | 0.381              | 0.040      | -37.203              | /                      |
| l5        | -45.057        | 0.206      | -4.987             | 0.009      | -5.161               | /                      |
| l6        | -52.866        | 0.187      | -6.150             | 0.049      | -3.666               | /                      |
| r1        | -66.157        | 0.118      | -10.069            | 0.015      | 14.395               | /                      |
| r2        | -64.996        | 0.148      | -9.549             | 0.012      | 11.396               | /                      |
| r3        | -73.790        | 0.315      | -11.083            | 0.021      | 14.874               | /                      |
| r4        | -85.155        | 0.244      | -11.781            | 0.005      | 9.093                | /                      |
| r5        | -74.978        | 0.195      | -10.084            | 0.003      | 5.694                | /                      |
| s1        | -70.832        | 0.074      | -10.340            | 0.007      | 11.888               | /                      |
| s2        | -72.601        | 0.281      | -10.468            | 0.046      | 11.143               | /                      |
| p1        | -47.435        | 0.374      | -7.141             | 0.017      | 9.693                | /                      |

**Table 4.** The statistical frequency of rainfall events being >20 mm per year during the recent 30 years from 1985 to 2014. The data come from the China Meteorological Data

896    Sharing Service System.

| Station    | One<br>time/year | Two<br>times/year | Three<br>times/year | Four<br>times/year | Five<br>times/year | Six<br>times/year | Seven<br>times/year | Mean<br>times/year |
|------------|------------------|-------------------|---------------------|--------------------|--------------------|-------------------|---------------------|--------------------|
| Duolun     | 2                | 8                 | 8                   | 4                  | 4                  | 3                 | 1                   | 3.4                |
| Xilinhaote | 8                | 5                 | 2                   | 6                  | 3                  | 2                 | 0                   | 2.5                |

897  
898    **Table 5.** The measured contents of tritium in the groundwater samples studied and the calculated ages of these samples.

| Sample-ID | Tritium content (T.U.) | Possible ages (years) |
|-----------|------------------------|-----------------------|
| g1        | not measured           | not clear             |
| g2        | not measured           | not clear             |
| g3        | not measured           | not clear             |
| g4        | 7.25                   | 20-40                 |
| g5        | 9.97                   | 13-33                 |
| g6        | 22.91                  | 0-20                  |
| g7        | not measured           | not clear             |
| g8        | 19.61                  | 0-20                  |
| g9        | 24.34                  | 0-17                  |
| g10       | 18.68                  | 0-22                  |
| g11       | 1.86                   | 40-65                 |

899

# Direct or indirect recharge on groundwater in the middle-latitude desert of Otindag, China?

Bing-Qi Zhu<sup>1\*</sup>, Xiao-Zong Ren<sup>2</sup>, [Patrick Rioual<sup>3</sup>](#)

<sup>1</sup>KLWCRES, IGSNRR, CAS, Beijing, China

<sup>2</sup>SGS, TYN, Jinzhong, China

<sup>3</sup>KLCGE, IGCAS, Beijing, China

Correspondence to: Bing-Qi Zhu ([zhubingqi@sina.com](mailto:zhubingqi@sina.com))

**Abstract.** ~~Although rainfall is scarce in most desert lands of the world, the Otindag Desert in the middle-latitude desert zone of northern China in Northern Hemisphere (NH) has abundant water resources, mainly groundwater. To gain an insight into the origin of groundwater in this desert, stable and radioactive isotopes and major ion hydrochemistry of groundwater, as well as other natural waters including river water, spring water, lake water and precipitation water, were investigated in the eastern part of the Otindag. The results showed that the groundwater in the Otindag were freshwater (TDS < 700 mg/L) and were depleted in  $\delta^2\text{H}$  and  $\delta^{18}\text{O}$ , when compared with the modern precipitation. The major water types were the  $\text{Ca-HCO}_3$  and  $\text{Ca/Mg-SO}_4$  types waters. No  $\text{Cl}$ -type and  $\text{Na}$ -type waters occurred in the study area. The ionic and depleted stable isotopic signals in groundwater, as well as the high values contents in of tritium contents (5–25 TU), indicated that these groundwaters studied were young but not of meteoric origin, i.e., out of control by the modern and palaeo-direct recharge. Clear differences in the isotopic signals were observed between the groundwaters in the north (NPCSX) and south (SPCSX) parts of the study area, but the signals were similar in between the groundwaters between in the NPCSX and its neighbouring catchment, the Dali Basin. The topographical elevation is decreasing from the SPCSX (1396 m a.s.l.) to the NPCSX (1317 m a.s.l.) and the Dali (1226 m a.s.l.). Groundwaters in the NPCSX were characterized by lower elevations, the lower chloride and TDS concentrations, higher tritium contents, higher deuterium excess, and more depleted values of  $\delta^2\text{H}$  and  $\delta^{18}\text{O}$  than those in the SPCSX. The spatial distribution pattern of these environmental parameters indicates a discrepancy between in the one hand, the hydraulic gradient of groundwater and in the other hand, the isotopic and hydrochemical gradients of groundwater in the desert eastern Otindag. It also suggests that the groundwaters have different water recharge sources between the two areas in the study area. However, the groundwaters in the two areas shared a common evaporation line (EL2) in the Craig diagram of  $\delta^2\text{H}$  and  $\delta^{18}\text{O}$ , indicating a genetic relationship in their recharge sources. Combined analysis was further performed using the isotopic and physio-chemical data of natural waters collected from the Dali Basin and the surrounding mountains. It indicated that the major recharge sources of the groundwaters in the NPCSX, as well as the river waters and groundwaters in the Dali Basin, were mainly derived from the Daxin-Anling Mountains, by leaking of the Xilamulan River water through a thick aquifer in the eastern margins of the Otindag. By contrast, While the groundwaters in the~~

带格式的：行距：1.5 倍行距

带格式的：上标

带格式的：上标

域代码已更改

带格式的：字体颜色：自动设置

带格式的：无下划线，字体颜色：自动设置

SPCSXweremainly recharged from two sources. One was the flash floodsderived from the Yinshan Mountains and the river waters other was the Xilamulun River waters derived from the Daxin'Anlin Mountains. It indicates that the modern indirect recharge mechanism, instead of the direct recharge and the palaeo-water recharge, is the most significant for groundwater recharge in the eastern Otindag. This suggests that the tectonic settings at a regional scale, but not the climate is at the origin of was responsible for the groundwater origin in the Otindag. This study provides a new perspective sight into the origin and evolution of groundwater resources in the middle-latitude desert zone of NH. The Otindag Desert is essential to livestock-economy and ecoenvironment of northern China. Although surface water is the traditional source for China's socio-economy in arid areas, the groundwater resources underlying the desert are increasingly burdened by groundwater pumping, which increases interest in the status of the groundwater resources. Widespread fresh groundwater deep to 60 m was found at the eastern part of the Otindag Desert. The occurrence of this massive fresh groundwater raises doubts on the often-made assumption in the literature that regional atmospheric precipitation or palaeowater, namely the direct recharge, is the source of water in the middle-latitude desert aquifers of northern China and makes further investigation necessary. Knowledge on the origin and recharge of this fresh groundwater is key in assessing the possibility of groundwater exploitation and utilization. In this study we conducted hydrogeochemical and isotopical analyses to assess possible origin and recharge of these groundwaters. It is concluded that the fresh groundwater can neither originate from regional atmospheric precipitation derived from the Asian Summer Monsoon system, nor from palaeowater that formed during the last glacial period. Our results indicate that with groundwater dating it is possible to originate from remote mountain areas via the faults of the Solonker Suture zone, including the Daxing'Anlin and Yinshan Mountains. Furthermore, it is deduced that the hydrological connection between desert aquifers and mountain systems through the suture zone is crucial to the hydrogeological functioning of the Otindag aquifer. This suggests that the modern indirect recharge mechanism, instead of the direct recharge and the palaeo-water recharge, is the most significant for groundwater recharge in the Otindag Desert. This study provides a new perspective into the origin and evolution of groundwater resources in the middle-latitude desert zone of Asian continent.

**Keywords:** fresh groundwater recharge; origin; atmospheric precipitation; direct recharge; indirect recharge; palaeowater recharge; fault hydrology; middle-latitude desert; direct and indirect recharge; stable and radioactive isotope; ion hydrochemistry; climate control; tectonic control; Otindag Desert.

## 1. Introduction

**Water Resources.** In a semi-arid to arid region where rainfall is insufficient to supply the needs of a growing population and a higher standard of living, the deficit is normally made up by extracting groundwater. [Alsharhan, 2001, Hydrogeology of an Arid Region The Arabian Gulf and Adjoining Areas] As rainfall events are infrequent in arid and semi-arid regions of the world, surface runoff and related water resources are globally scarce and ephemeral. These areas thus rely heavily on groundwater as the primary water resource to support local ecosystems (Herezeg and Leaney, 2011; Scanlon et al., 2006). It has been widely proved that the origin, quality and quantity of groundwater in

带格式的: 无下划线, 字体颜色: 自动设置, 图案: 清除

带格式的: 无下划线, 字体颜色: 自动设置

带格式的: 无下划线, 字体颜色: 自动设置, 图案: 清除

带格式的: 无下划线, 字体颜色: 自动设置

arid lands can be deeply influenced by environmental factors/processes, which controlling the groundwater recharge and evolution, such as in the arid lands of northwestern China and Central Asia (Zhu et al., 2015, 2016, 2017). For this reason these factors/processes become an essential component in the understanding of regional hydrological systems and the management of water resources (Dogra et al., 2012). For example, groundwater recharged by modern precipitation can refill quickly but is vulnerable to contamination by the surface wastes, inversely, groundwater containing mostly ancient water may not recharge to a useful extent over human timescales and cannot be affected by surface waters (Bethke and Johnson, 2008). Therefore, different strategies on groundwater resources management should be adopted when the different recharge mechanisms of groundwater occurring.

In general, groundwater recharge can be broadly classified into two ways, the direct recharge, namely diffuse recharge by native water resources, and the indirect recharge, namely focus recharge by external water resources. The direct recharge is replenished by precipitation infiltration through the unsaturated zone and the indirect recharge is defined as recharge from mappable features such as rivers, canals, and lakes originated from remote areas (Healy, 2010). It is well known that groundwater recharge can be influenced by environmental factors, including climate change, underlying soil and geology, land cover and population growth, over withdrawal and economic development (Zhu et al., 2015, 2017), thus the amount of groundwater in arid and semi-arid regions decrease rapidly while human demands on the limited water resources increase rather than decrease (Ma et al., 2013). Between environment and groundwater recharge, climate and land cover largely determine precipitation and evapotranspiration, whereas the underlying soil and geology dictate whether a water surplus (precipitation minus evapotranspiration) can be transmitted and stored in the subsurface (Giordano, 2009; Doll, 2009). Modelled estimates of diffuse recharge globally (Doll and Fiedler, 2008; Wada et al., 2010) range from 13,000 to 15,000 km<sup>3</sup>/yr, equivalent to 30% of the world's renewable freshwater resources (Doll, 2009) or a mean per capita groundwater recharge of 2100 to 2500 m<sup>3</sup>/yr. These estimates represent potential recharge fluxes as they are based on a water surplus rather than measured contributions to aquifers. Furthermore, these modelled global recharge fluxes do not include focused recharge, which, in semi-arid and arid environments, can be substantial (Scanlon et al., 2006; Favreau et al., 2009). For keeping sustainable management of water resources, it requires urgently to understand both diffuse and focused recharge and meet both human and ecosystem needs in arid areas of the world, particularly in Central Asia and Northern China.

Many areas in the middle-latitude desert zone of northern China such as the Badanjilin Desert, the Mu US sandy Land and the Hobq Desert (Chen et al., 2012a; Chen et al., 2012b), are unexpectedly rich in incommensurate with large groundwater resources, such as the Badanjilin Desert, the Mu Us Sandy Land and the Hobq Desert (Chen et al., 2012a; Chen et al., 2012b), although they have been under arid or hyper-arid climate for a long time (Sun et al., 2010). How these groundwaters are originated and how they are recharged in these deserts are thus fundamental scientific becoming a key questions. Until now, however, no consensus has been achieved it has long been altered in the academic circles.

For some of the earth scientists, the direct recharge is thought to be very important for

带格式的: 无下划线, 字体颜色: 自动设置

groundwaters in the wide desertlands of northwestern China due to lack of surface runoffs (Yang et al., 2010; Yang and Williams, 2003; Zhao et al., 2017). They argued that although the amount of atmospheric precipitation is small, the vast catchment area in the desert region could concentrate the rainfall into large inland basins, creating an aquifer with large storage capacity and great thickness. However, some of hydrologists suggested that the estimate of direct recharge used by the chloride mass balance method was 1.4 mm/year, approximately only 1.7% of the mean annual precipitation in a cold large desert (Badanjilin) in northern China (Gates et al., 2008). A similar estimation was only 1 mm/year for Gobi deserts from the Hexi Corridor to the Inner Mongolia Plateau in northwestern China (Ma et al., 2008). Consequently, they thought that heavy potential evaporation and little precipitation make it difficult for direct recharge to meet the supply of groundwater in these desert areas. Thus, the indirect recharge is considered to be an important mechanism for groundwater recharge in these desert areas. For example, based on isotopic compositions of natural waters, Zhao et al. (2012) suggested that little precipitation had recharged into groundwaters in the Badain Jaran Desert. Chen et al. (2004) argued that the groundwaters in the Badanjilin Desert were recharged by palaeo-glacial melt water through faults and deep carbonate layers far away from the local desert. Many studies also suggested that palaeowaters stored in aquifer during wetter climate periods could recharge to groundwater under certain conditions in arid lands (Edmunds et al., 2006; Ma and Edmunds, 2006). Other kinds of indirect recharge, such as mountain front recharge from adjacent mountain blocks, are also proposed to offer an important inflow to aquifers within arid to semiarid catchments (Blasch and Bryson, 2007).

The Otindag Desert is one of the largest sandy desert lands located at the monsoon margin of northern China and is the geographical centre of the northeastern Asian Continent (Fig. 1), which can be regarded as a significant repository of information relating to the groundwater recharge in the arid Inner Asia. At present, the eastern Otindag is also a typical case for its unexpected incommensurate groundwater resources, because there is abundant groundwater in this desert land and even rivers originate there due to the spillover of spring water, such as the tributaries of Xilamulun River in its north and the Shandian River in its south (Fig. 1). Climatically, the monsoon margin of northern China refers to a strip along the present East Asian Summer Monsoon (EASM) limits and is considered to be sensitive to climate change (Wang and Feng, 2013). Geologically, the Otindag Desert lies in a tectonic depression of the central Solonker suture zone with a few faults stretching east and west (Fig. 2), with its northern margin along a fault marked by a series of lake basins. Thus, the large-scale hydrogeological conditions of the Otindag Desert belong to a fault zone under the influence of the EASM climate.

Until now, however, whether the climate or other factors the tectonic faults affected the origin of groundwater recharge and the fluid flow patterns in groundwater aquifers in the Otindag are still not known. Because at present, little data and documents about the groundwater and its origin is available in the literature in Otindag, and knowledge and reliable data on various hydrogeological characteristics of the desert such as the catchment extent, input/output, the hysteretic hydraulic functions, the transient hydraulic conditions, in-homogeneities, and on transfer functions to

带格式的: 无下划线, 字体颜色: 自动设置

带格式的: 行距: 1.5 倍行距

带格式的: 无下划线, 字体颜色: 自动设置

带格式的: 无下划线, 字体颜色: 自动设置, 检查拼写和语法, 图案: 清除

带格式的: 无下划线, 字体颜色: 自动设置

带格式的: 无下划线, 字体颜色: 自动设置, 图案: 清除

带格式的: 无下划线, 字体颜色: 自动设置

带格式的: 无下划线, 字体颜色: 自动设置

带格式的: 无下划线, 字体颜色: 自动设置

overcome scale problems are also missing. Under such conditions, conventional methods such as water balance and hydraulic methods sometimes fail in determining groundwater recharge, particularly in extreme environments (arid, semi-arid, or cold) (Drever, 1997). ~~Because~~ pristine aquatic conditions may significantly differ from managed conditions in arid environment, and thus groundwater recharge is not a fixed number, but may vary with the boundary conditions of the recharge system (Seiler and Gat, 2007).

~~can be obtained in literature. Whether the direct or indirect recharge is the major mechanism for groundwater recharge in Otindag.~~ In general, groundwater recharge can be broadly classified into two categories: the direct recharge by native water resources and the indirect recharge by external water resources (Herczeg and Leaney, 2011). Water infiltration of atmospheric precipitation through the unsaturated zone to the groundwater is hydrologically defined as the direct recharge, and the indirect recharge is defined as recharge from mappable features such as rivers, canals, lakes and originates from remote areas (Scanlon et al., 2006; Healy, 2010) ~~(Healy, 2010)~~. It is well known that groundwater recharge can be influenced by environmental factors, including climate change, underlying soil and geology, land cover and the growth in human population that affects withdrawal and economic development (Zhu et al., 2015, 2017). Among these environmental factors, climate and land cover largely determine precipitation and evapotranspiration, whereas the underlying soil and geology dictate whether a water surplus (precipitation minus evapotranspiration) can be transmitted and stored in the subsurface (Giordano, 2009; Doll, 2008, 2009; Giordano, 2009).

For some earth scientists, the direct recharge is thought to be very important for groundwaters in the wide desert lands of north China due to the lack of surface runoffs (Yang et al., 2010; Yang and Williams, 2003; Zhao et al., 2017) ~~(Yang et al., 2010; Yang and Williams, 2003; Zhao et al., 2017)~~. They argued that although the amount of atmospheric precipitation is small, the vast catchment area in the desert region could concentrate the rainfall into large inland basins, creating an aquifer with large storage capacity and great thickness. However, some hydrologists estimated by the chloride mass balance method that the direct recharge was 1.4 mm/year, which represents approximately only 1.7% of the mean annual precipitation in a cold large desert (Badanjilin) in northern China (Gates et al., 2008) ~~(Gates et al., 2008)~~. A similar estimation of 1 mm/year was given for Gobi deserts from the Hexi Corridor to the Inner Mongolia Plateau in northwestern China (Ma et al., 2008) ~~(Ma et al., 2008)~~. Consequently, they thought that heavy potential evaporation and little precipitation make it difficult for direct recharge to meet the supply of groundwater in these desert areas. Thus, the indirect recharge is considered to be an important mechanism for groundwater recharge in these desert areas. For example, ~~based on isotopic compositions of natural waters,~~ Zhao et al. (2012) suggested that little precipitation had recharged into groundwaters in the Badain Jaran Desert. Chen et al. (2004) argued that the groundwaters in the Badanjilin Desert were recharged by palaeo-glacial melt water through faults and deep carbonate layers far away from the local desert. Many studies also suggested that palaeowaters stored in an aquifer during wetter climate periods could recharge to groundwater under certain conditions in arid lands (Edmunds et al., 2006; Ma and Edmunds, 2006). Other kinds of indirect recharge, such as mountain front recharge from adjacent mountain blocks, are also proposed to offer an important inflow to aquifers within arid to semiarid catchments (Blasch and Bryson, 2007) ~~(Blasch and~~

带格式的: 无下划线, 字体颜色: 自动设置

带格式的: 无下划线, 字体颜色: 自动设置, 图案: 15% (自动设置前景, 白色 背景)

带格式的: 无下划线, 字体颜色: 自动设置



Bryson, 2007).

In this paper, we focus to answer the question that whether groundwater recharge in Otindag is mainly direct or indirect, using hydrochemical and isotopic indicators as tracers to offer a valuable support for identifying the contributions of precipitation recharge on groundwater, since these indicators reflect the composition of water molecules and are sensitive to physical processes such as mixing and evaporation (Lawrence et al., 1976; Coplen, 1993; Sultan et al., 2000; Guendouz et al., 2003; Petrides et al., 2006; Scanlon et al., 2006; Zhu et al., 2007, 2008; Jobbágy et al., 2011; Zhai et al., 2013; Eissa et al., 2014). T<sub>2</sub> as the abovementioned hot question for other deserts in China, is also unknown.

It should be kept in mind that virgin aquatic conditions may significantly differ from managed conditions in arid environment, because groundwater recharge is not a fixed number, but may vary with the boundary conditions of the recharge system (Seiler and Gat, 2007). Conventional methods such as water balance and hydraulic methods sometimes fail in determining groundwater recharge in extreme environments (arid, semi-arid, or cold) (Drever, 1997), because of missing knowledge and the lack of reliable data on various characteristics such as the catchment extent, input/output, the hysteretic hydraulic functions, the transient hydraulic conditions, in homogeneities, and on transfer functions to overcome scale problems (Seiler and Gat, 2007). Under such conditions, tracer methods offer a valuable support for natural water studies.

Geochemical elements and environmental isotopes have been widely used as effective tracers to determine the sources of groundwater recharge, which could be attributed to infiltration by rainfall, surface waters or both of them (Zhu et al., 2007, 2008; Zhu et al., 2017). For example, by comparing the composition of stable isotopes of hydrogen and oxygen in local meteoric waters with these in groundwaters, many studies successfully applied in identifying whether the rainfall play a vital role in recharging groundwater or not (Zhu et al., 2007; Petrides et al., 2006; Jobbágy et al., 2011; Zhai et al., 2013). Also, investigating the spatial distribution of groundwater age represented by the concentration of tritium or radioactive carbon (<sup>14</sup>C) can provide a way to understand the recharge relationship between the modern rainfall and the groundwater (Sultan et al., 2000; Zhu et al., 2008). For the indirect recharge, the groundwater flow regimes or its movement pathway deduced from hydrochemical and isotopic tracers can indicate its origin and recharge processes. For example, the groundwater mineralisation will increase as a result of dissolution of evaporite minerals along flow lines that begin with the recharge area (Guendouz et al., 2003). While, the geochemical and isotopic composition of groundwaters will be much complex at interface zones between groundwaters with different hydrochemistry or ages, they will show distinct physiochemical characteristics indicating how they mixed (Lawrence et al., 1976; Eissa et al., 2014).

The detailed objectives of this study are: (1) to examine the distribution patterns of environmental signals in the stable and radioactive isotopes and the major ionic hydrochemistry of groundwater in the eastern Otindag drainage system, and (2) to recognize the major sources of groundwater in the area, and (3) to identify the key mechanism of groundwater recharge in the desert land, particularly to discriminate whether the direct recharge or the indirect recharge being the major control on groundwater recharge in the desert land.

带格式的: 无下划线, 字体颜色: 自动设置, 图案: 清除

带格式的: 无下划线, 字体颜色: 自动设置

带格式的: 无下划线, 字体颜色: 自动设置, 图案: 清除

带格式的: 无下划线, 字体颜色: 自动设置, 图案: 清除

带格式的: 无下划线, 字体颜色: 自动设置, 图案: 清除

带格式的: 无下划线, 字体颜色: 自动设置

## 2. Regional settings

**Geographic setting.** The Otindag Desert lies between latitudes 42° and 44°N and longitudes 112° and 118° E (Fig. 1). It forms a part of the great middle-latitude desert belt in northern China which stretches from the Taklamakan Desert of northwestern China to the Kelqin Desert of northeastern China, near the west coast of the Pacific Ocean. The desert has an area of approximately 21,400 square kilometers ( $\text{km}^2$ ) and is a middle-latitude sandy land desert located in the eastern part of the Inner Mongolia Plateau and situated at the monsoon margin of northern China as the geographical centre of the northeastern Asian Continent (Fig. 1). It is the fourth largest sandy land in China (Yang et al., 2012) and is bordered by a flat steppe terrain of Dali Basin to the north, the Yinshan Mountains Range and mountainous loess landscape to the south, and the Greater Khingan (Daxing'anling) Mountains Range to the east (Fig. 1). The Otindag Desert is essential to livestock-economy and environment of northern China. Settlements in this desert are restricted to areas to permanent springs, shallow groundwater and oases to areas where irrigation is possible. Some nomads continue to eke out a precarious existence grazing livestock in the desert.

**Topography and geomorphology.** The Otindag Desert has a varied relief, combining extensive dune fields with rugged mountains along the eastern, southern and southeastern rims. In the east, the Daxing'anling Mountains stretch from the Heilong River Valley into the upper reach valleys of the Xilumulun River from northeast to southwest, gradually increasing in height northwards from about 180 m near Huma to Huanggangliang, where the highest peaks reach 2,029 m with an average elevation range from 1,100 to 1,400 m. In the south and southeast, the Yinshan Mountains decline gradually near Duolun and Zhenglanqi, and in some areas leave wide alluvial plains. The terrain of the Otindag Desert is less rough and elevations decrease from ca. 1300 m in the southeast to ca. 1000 m in the northwest. Over the greater part of this desert the ground cover consists of fixed and semi-fixed sandy dunes, with a few mobile dunes in area of little vegetation. The dominated dune types are represented from parabolic to barchans, linear and grid-formed types, ranging from a few meters to over 40 m in height (Zhu et al., 1980; Yang et al., 2008).

### Climate, vegetation and soil

The climate of the Otindag Desert was not uniform in geological period, with much sand movement, occasional rainy years, and several wetter intervals during the Holocene (Yang et al., 2015; Tian et al., 2017). At present, the Sandy Land is in a tectonic depression with a few faults stretching east and west, with its northern margin along a fault marked by a series of lake basins. Tertiary and Quaternary sandstones and mudstones are the common basement rocks under the dunes, and extensive volcanic basalts forming flat terrains are to the north (Zhu et al., 1980; Li et al., 1995). (Yang et al., 2007, Catena)

The Otindag's elevation is variable, ranging from ca. 1300 m in the southeast to ca. 1000 m in the northwest. The whole desert belongs to the temperate-arid and semi-arid temperate zone of northern China, with a mean annual temperature of 2 °C in the north and 4 °C in the south (Liu and Yang, 2013; Liu and Yang, 2013). At the regional scale, the climate of the desert is typically controlled by the East-Asian Monsoon system, characterized by a warm summer, with precipitation transported by the EASM, and by a cold and dry winter under the influence of the East Asian Winter

带格式的: 无下划线, 字体颜色: 自动设置

带格式的: 无下划线, 字体颜色: 自动设置

带格式的: 行距: 1.5 倍行距

带格式的: 无下划线, 字体颜色: 自动设置

带格式的: 无下划线, 字体颜色: 自动设置, 图案: 清除

带格式的: 无下划线, 字体颜色: 自动设置

带格式的: 无下划线, 字体颜色: 自动设置, 图案: 清除

带格式的: 无下划线, 字体颜色: 自动设置

带格式的: 无下划线, 字体颜色: 自动设置

带格式的: 无下划线, 字体颜色: 自动设置, 图案: 清除

带格式的: 无下划线, 字体颜色: 自动设置, 图案: 清除

带格式的: 无下划线, 字体颜色: 自动设置

带格式的: 字体: (默认) Times New Roman, 10 磅, 无下划线, 字体颜色: 自动设置

带格式的: 无下划线, 字体颜色: 自动设置

带格式的: 无下划线, 字体颜色: 自动设置

带格式的: 无下划线, 字体颜色: 自动设置

277 Monsoon (EAWM). The rainfall in the desert exhibits a wide variation in space and time. ~~I~~whose  
278 influence of the EASM ~~is~~ changes ~~ing~~ from southeast to northwest in the desert, and varies with latitude  
279 and distance from the Pacific Ocean, leading to the mean annual rainfall decreasing from ~450 mm in  
280 the southeast to ~150 mm in the northwest (Yang et al., 2013)(Yang et al., 2013). This uneven  
281 distribution of precipitation has a major influence on the availability of near-surface moisture,  
282 consequently on the distribution of vegetation, soil and the animal husbandry potential of local  
283 communities. The basic soil cover consists of grey desert soil in the west and changes to sierozems and  
284 chernozem or chestnut soil in the east. Through the desert, vegetation is sparse in the west and  
285 relatively abundant in the east. The natural vegetation is characteristic of desert or semi-deserts, with  
286 scrub woodland in the east and steppe in the west. Due to the scarcity of surface water, the growing  
287 season is affected by temperature, rainfall and elevation, and hence cultivation is restricted mainly to  
288 flood plains. Fixed and semi-fixed sandy dunes dominate the landscaped in the desert land, with a  
289 few mobile dunes in area of little vegetation. Several dDune types are represented various from  
290 parabolic to barchans, linear and grid formed types, ranging from a few meters to over 40 m in height  
291 (Yang et al., 2008; Zhu et al., 1980).

292 Geology. The Otindag Desert is located in a tectonic depression of the Solonker Suture Zone  
293 (Jian et al., 2010) bounded by the Northern Early to Mid-Paleozoic Orogen Zone and the Hatug Uul  
294 Block to the north, the Southern Early to Mid-Paleozoic Orogen Zone and the North China Craton  
295 system to the south (Fig. 2). A few faults such as the Xar Moron Fault and Chifeng-Bayan Obo Fault  
296 stretch east and west, with its northern margin along the Solonker Suture Zone marked by a series of  
297 lake basins (Figs. 1 and 2). The tectonostratigraphic units and overall structural trends are mainly  
298 oriented NE-SW (Fig. 2), which may be interpreted as resulting from overall compressive stresses  
299 oriented principally in the NW-SE quadrants during orogenesis (Jian et al., 2010; Zhang et al., 2015).  
300 Diverse rock types from unlithified and lithified clastic sediments through to carbonate, crystalline, and  
301 volcanic rocks are distributed in and around the Otindag Desert (Zhang et al., 2015) (Figs. 2 and 3XX).  
302 【Dense et al., 2013, ESR】

303 Tertiary and Quaternary sandstones and mudstones are the common basement rocks under the  
304 dunes of the Otindag, and extensive volcanic basalts forming flat terrains are to the north (Zhu et al.,  
305 1980; Li et al., 1995).

#### 306 Hydrology and hydrogeology.

307 The Otindag Desert originated during the Late Quaternary (Yang et al., 2015) and various  
308 alluvial fans formed at the margins of this desert during the early to middle Holocene. These are  
309 composed of conglomerate and sand deposits, where major periodic streams or wadis debouched into  
310 the Otindag. At present two rivers run through the eastern margin of the Otindag Desert, i.e. the  
311 Xilamulun River in the north and the Shandian River and its two tributaries, the Shepi River and  
312 Tuligen River in the south. Both stem from the eastern and southeastern parts of the Otindag (Fig. 1).  
313 The Xilamulun River, 380 km in length and  $32.54 \times 10^3 \text{ km}^2$  in area, is a neighboring river both to the  
314 northeastern Otindag and the southeastern Dali Basin, the northern catchment of the Otindag Desert.  
315 The Xilamulun River flows to the east and finally goes into the Xiliao River, with an annual mean  
316 runoff of  $6.58 \times 10^8 \text{ m}^3$  (Wu et al., 2014). The Shandian River is the upper reach of the Luan River,

带格式的: 无下划线, 字体颜色:  
自动设置

带格式的: 无下划线, 字体颜色:  
自动设置

带格式的: 无下划线, 字体颜色:  
自动设置

带格式的: 无下划线, 字体颜色:  
自动设置

带格式的: 行距: 1.5 倍行距

带格式的: 无下划线, 字体颜色:  
自动设置, 图案: 清除

带格式的: 无下划线, 字体颜色:  
自动设置, 图案: 清除

带格式的: 无下划线, 字体颜色:  
自动设置

带格式的: 无下划线, 字体颜色:  
自动设置

带格式的: 无下划线, 字体颜色:  
自动设置, 图案: 清除

带格式的: 无下划线, 字体颜色:  
自动设置

带格式的: 缩进: 首行缩进: 2.5  
字符, 行距: 1.5 倍行距

带格式的: 无下划线, 字体颜色:  
自动设置

带格式的: 无下划线, 字体颜色:  
自动设置

with a length of 254 km and a catchment area of  $4.11 \times 10^3 \text{ km}^2$  (Yao et al., 2013). Along the low, flat and sandy shorelines of some lakes in the Otindag, salt flats or sabkhas have formed in shallow depressions. Due to the high rate of evaporation, salt crusts develop which have been locally exploited where the salt is relatively free from sand. During rainy season, some rain and floodwaters (generally coming from the Yinshan piedmonts) are retained in low-lying areas, which may temporarily recharge shallow aquifers. Under storm conditions, occasional heavy, short rainstorms cause floods in soil-rich wadi channels. Under other conditions, sand dunes and sand sheets bury the ground and sabkhas.

The Otindag Desert can depend on several water-bearing formations and units (aquifers) for their groundwater resources (Fig. 3). Coarse- to fine-grained fault-zone hydrogeology (Bense et al., 2013, ESR).

Outcrop observations indicate that fault zones commonly have a permeability structure suggesting they should act as complex conduit barrier systems in which along-fault flow is encouraged and across fault flow is impeded (Bense et al., 2013, ESR).

Hydrogeological observations of fault zones reported in the literature show a broad qualitative agreement with outcrop-based conceptual models of fault zone hydrogeology (Bense et al., 2013, ESR).

Nevertheless, the specific impact of a particular fault permeability structure on fault zone hydrogeology can only be assessed when the hydrogeological context of the fault zone is considered and not from outcrop observations alone (Bense et al., 2013, ESR).

Diverse rock types from unlithified and lithified elastic sediments through to carbonate, crystalline, and volcanic rocks are distributed in and around the Otindag Desert (Fig. XX) (Bense et al., 2013, ESR).

Fine-grained sedimentary rocks, magmatic rocks and aeolian sediments metamorphic rocks of the Inner Mongolia-Daxing'Anling Orogenic Belt (Zhang et al., 2015) XXXX geological provinces form the major regional aquifer unit (Fig. 3). They are composed mainly of alluvial sediments (mid-Permian Zhesi Formation), melange (Solonker suture zone), A-type granite (early Permian), bimodal volcanic rocks with sedimentary intercalations (early Permian Dashizhai Formation), diorite-quartz diorite-granodiorite rocks (Carboniferous-Permian) and metamorphic complex (predominantly gneiss, early Paleozoic) (Fig. 2). The aquifer is generally unconfined in dune fields of the Otindag Desert, unconfined to semi-confined in the YinshanXXX Mountains' piedmont, and semi-confined to confined in the Daxing'AnlingXXX uplands (Fig. 3). Water-level measurement in June 2010 indicated that the general depth of unconfined groundwater level ranges between 10 to 70 m in the Otindag Desert (Fig. 3). Local granular aquifers in the central desert are composed of coarse to coarse fluvial, lacustrine and aeolian sediments, but their extent and thickness vary throughout the watershed (Zhu et al., 1980; Li et al., 1995). (Benoit et al., 2014, CWRJ) The generally coarse-grained texture of the unconsolidated rock formations provides primary porosity in terms of groundwater flow in the desert.

Most of the tectonic fabric of the Appalachians was generated by compression or low angle thrusting; in those areas where major faults are strike-slip in nature, deformation is largely limited to rocks adjacent to the faults. The tectonostratigraphic units and overall structural trends are mainly oriented NE-SW, which may be interpreted as resulting from overall compressive stresses oriented principally in the NW-SE quadrants during orogenesis (Faure et al. 2004, 2006). The generally fine-grained texture of the rock formations provides negligible primary porosity in terms of

带格式的: 无下划线, 字体颜色: 自动设置

带格式的: 无下划线, 字体颜色: 自动设置

带格式的: 行距: 1.5 倍行距

带格式的: 无下划线, 字体颜色: 自动设置, 图案: 清除

带格式的: 无下划线, 字体颜色: 自动设置

带格式的: 无下划线, 字体颜色: 自动设置, 图案: 清除

带格式的: 无下划线, 字体颜色: 自动设置

带格式的: 无下划线, 字体颜色: 自动设置, 图案: 清除

带格式的: 无下划线, 字体颜色: 自动设置

带格式的: 无下划线, 字体颜色: 自动设置, 图案: 清除

带格式的: 无下划线, 字体颜色: 自动设置

带格式的: 无下划线, 字体颜色: 自动设置, 图案: 清除

带格式的: 无下划线, 字体颜色: 自动设置

带格式的: 无下划线, 字体颜色: 自动设置, 图案: 清除

带格式的: 无下划线, 字体颜色: 自动设置

带格式的: 无下划线, 字体颜色: 自动设置, 图案: 15% (自动设置前景, 白色背景)

带格式的: 无下划线, 字体颜色: 自动设置

带格式的: 无下划线, 字体颜色: 自动设置

带格式的: 无下划线, 字体颜色: 自动设置

带格式的: 字体颜色: 自动设置

带格式的: 无下划线, 字体颜色: 自动设置

groundwater flow (Benoit et al. 2008). [Benoit et al., 2014, CWRJ].

Deformation along faults in the shallow crust (<1 km) introduces permeability heterogeneity anisotropy, which has an important impact on processes such as regional groundwater flow. Fault zones have the capacity to be hydraulic conduits connecting shallow and deep geological environments, but simultaneously the fault cores of many faults often form effective barriers to flow. The direct evaluation of the impact of faults to fluid flow patterns remains a challenge and requires a multidisciplinary research effort of structural geologists and hydrogeologists. [Bense et al., 2013, ESR]

The Otindag Desert depend on several water bearing formations and units (aquifers) for their groundwater resources. They are composed mainly of sandstone and limestone. [Alsharhan, 2001, Hydrogeology of an Arid Region The Arabian Gulf and Adjoining Areas].

During rainy season, some rain and flood waters are retained behind dune dams and recharge shallow aquifers.

Two rivers in run through the Otindag, i.e. the Xilamulun River in the north and the Shandian River and its with two tributaries, of the Shepi River and the Tuligen River in the south. Both stem from the eastern and southeastern parts of the Otindag (Fig. 1). The Xilamulun River flows to the east and finally goes into the Xiliao River, with a catchment area of  $32.54 \times 10^3 \text{ km}^2$  and an annual mean runoff of  $6.58 \times 10^8 \text{ m}^3$  (Wu et al., 2014). The Shandian River is the upper reach of the Luan River, with a length of 254 km and a catchment area of  $4.11 \times 10^3 \text{ km}^2$  (Yao et al., 2013).

### 3. Methods

The hydrochemistry of natural water in the Otindag Desert, as related to the prevailing EASM climate, as well as, the dominant topographical, geological (tectonic) and hydrogeological conditions, are discussed here and interpreted, using chemical and isotope analyses of water samples from rain, springs, shallow aquifers and deep aquifers, rivers and lakes, and are represented on relevant graphs and diagrams. Fieldworks took place during the summer season of 2011 and the spring season of 2012. The water samples selected in this study were all collected from natural water, including the groundwater, river water, lake water, spring water and precipitation water in types A. Total of twenty-five water samples were analyzed collected for ion-chemical, stable and radioactive isotopic analysis in this study. Water Groundwater samples is the major type among these waters, which were mainly retrieved taken from shallow and deep wells widely located over a wide area in dune fields of the study regions area. The detailed locations of the sampling sites are shown in Fig. 4.

Two groups of parameters are measured to characterize the chemistry of any water analysis: field-measured parameters and lab-measured parameters. The field-measured parameters include temperature ( $^{\circ}\text{C}$ ), hydrogen-ion concentration (pH), electrical conductivity (EC in micro-Siemens per centimeter or  $\mu\text{S}/\text{cm}$ ) and total dissolved solid (TDS, mg/L). The values of these parameters change when they are not directly measured in the field. The number lab-measured parameters depend on the purpose of study. However, the measurement of major cations ( $\text{F}^-$ ,  $\text{Cl}^-$ ,  $\text{NO}_2^-$ ,  $\text{NO}_3^-$ ,  $\text{SO}_4^{2-}$ ,  $\text{HCO}_3^-$ ,  $\text{CO}_3^{2-}$  and  $\text{H}_2\text{PO}_4^-$ ) and anions ( $\text{Li}^+$ ,  $\text{Na}^+$ ,  $\text{NH}_4^+$ ,  $\text{K}^+$ ,  $\text{Mg}^{2+}$  and  $\text{Ca}^{2+}$ ) are determined in most chemical analyses. Analysis for stable ( $^2\text{H}$  and  $^{18}\text{O}$ ) and radioactive isotopes ( $^3\text{H}$ ) in rain and groundwater are

带格式的: 字体颜色: 自动设置

带格式的: 无下划线, 字体颜色: 自动设置

带格式的: 无下划线, 字体颜色: 自动设置

带格式的: 字体颜色: 自动设置

带格式的: 无下划线, 字体颜色: 自动设置, 图案: 清除

带格式的: 无下划线, 字体颜色: 自动设置

带格式的: 无下划线, 字体颜色: 自动设置, 图案: 清除

带格式的: 无下划线, 字体颜色: 自动设置

带格式的: 行距: 1.5 倍行距

带格式的: 无下划线, 字体颜色: 自动设置, 下标

带格式的: 无下划线, 字体颜色: 自动设置, 下标

带格式的: 无下划线, 字体颜色: 自动设置, 上标

带格式的: 无下划线, 字体颜色: 自动设置

带格式的: 无下划线, 字体颜色: 自动设置, 上标

带格式的: 无下划线, 字体颜色: 自动设置, 上标

带格式的: 无下划线, 字体颜色: 自动设置, 上标

带格式的: 无下划线, 字体颜色: 自动设置



also included. The analytical data of the physiochemical parameters and the stable and radioactive isotopes of the water samples collected in this study are listed in Tables 1, 2 and 3, respectively.

The surface waters were mainly sampled from rivers and lakes in the Otindag, and the spring waters were collected from the riverhead of the Xilamulun River, the Shepi River and the Tuligen River. One rainfall sample of the local atmospheric precipitation (p1) was also collected at the southeastern margin of the Otindag in the 2011 summer season. Water samples were filtered using 0.45 µm membrane filters for cation and anion analysis, and were acidified with 1% HNO<sub>3</sub> for cation analysis. Water samples for stable and radioactive isotope analysis were collected in the field with a polyethylene bottles of 0.5 L in volume, respectively. Variables Some kinds of analysis were measured on site with a portable instrument (Eijkellkamp). These determinations included temperature, pH, oxidation-reduction potential (Eh), electrical conductivity (EC), and total dissolved solid (TDS). The measurement errors bars were  $\leq 0.1$  °C for temperature,  $\leq 1\%$  for pH,  $\leq 5\%$  for Eh,  $\leq 5\%$  for EC, and  $\leq 0.5\%$  for TDS, respectively.

The concentrations of major anions (F<sup>-</sup>, Cl<sup>-</sup>, NO<sub>3</sub><sup>-</sup>, NO<sub>2</sub><sup>-</sup>, SO<sub>4</sub><sup>2-</sup> and H<sub>2</sub>PO<sub>4</sub><sup>-</sup>) and cations (Li<sup>+</sup>, Na<sup>+</sup>, NH<sub>4</sub><sup>+</sup>, K<sup>+</sup>, Mg<sup>2+</sup> and Ca<sup>2+</sup>) were determined by electrochemical detectors of an ion chromatography (Dionex-600) in the Institute of Geology and Geophysics, Chinese Academy of Sciences, with measurement errors bars  $\leq 3\%$  for anions and  $\leq 2\%$  for cations. The concentrations of carbonate (alkaline) ions of HCO<sub>3</sub><sup>-</sup> and CO<sub>3</sub><sup>2-</sup> were measured by titration with HCl (0.1 M) following the Gran Method (Gran, 1952), with an error bar  $\leq 5\%$ . The hardness (HD, German standards) of these water samples was calculated based on the equation  $HD = ([Mg^{2+}] \times 100/24.305 + [Ca^{2+}] \times 100/40.08)/17.847$ , [Mg<sup>2+</sup>] and [Ca<sup>2+</sup>] referring to the concentration of Mg<sup>2+</sup> and Ca<sup>2+</sup> with unit of mg/L.

Two stable isotopes of <sup>2</sup>H and <sup>18</sup>O, as being expressed in δ notation (δ<sup>2</sup>H = <sup>2</sup>H/<sup>1</sup>H, δ<sup>18</sup>O = <sup>18</sup>O/<sup>16</sup>O) relative to the Vienna standard mean water (VSMOW), were measured for all of the water samples collected in this study, using by MAT 252 in the Laboratory for Stable Isotope Geochemistry, Institute of Geology and Geophysics, Chinese Academy of Sciences, with σ  $\leq 0.374\%$  for δ<sup>2</sup>H and  $\leq 0.062\%$  for δ<sup>18</sup>O, respectively.

Several groundwater samples (500 ml each), collected from wells (6–60 m deep) in the study area, were prepared for the analysis of radioactive isotope (tritium) analysis. 300 ml of water sample, added with addition of 1 g KMnO<sub>4</sub>, were distilled to remove any impurities. In order to increase the tritium concentration to an easily measurable level, electrolytic enrichment was applied (Kaufman, 1954; Baeza et al., 1999). A volume of 250 ml of previously distilled sample with 2.5 g NaOH was then put to the electrolysis apparatus containing electrolytic cells with co-axial stainless steel electrodes. Electrolysis was carried out until the volume of electrolyte was reduced to 8 ml and all runs were performed at a temperature of 2–5 °C to prevent the loss of tritiated water molecules by evaporation. After electrolysis CO<sub>2</sub> was bubbled through the cell to neutralize the water because the medium in which the electrolysis took place earlier is alkaline. The water sample was separated from the electrolyte by distilling. The pretreated samples were measured by a low level background liquid scintillation counter (Quantulus 1220-003) according to the manufacturer's guidelines. The error bar of the measurement errors are should be  $\leq 3\%$ . The tritium data of several groundwater samples collected in this study had been partially mentioned by Yang et al. (2015) as one of the supplementary materials.

带格式的: 无下划线, 字体颜色: 自动设置

带格式的: 无下划线, 字体颜色: 自动设置, 下标

带格式的: 无下划线, 字体颜色: 自动设置

带格式的: 无下划线, 字体颜色: 自动设置

带格式的: 无下划线, 字体颜色: 自动设置

436 It was systematically discussed in this study.

437

#### 438 4.Results and Discussions

439

440 The analytical data of the physiochemical parameters and the stable and radioactive isotopes of  
441 the water samples collected in this study werelisted in Tables 1, 2 and 3, respectively. The study area  
442 and the sampling siteslocation for each sample analyzed wereshowed in Figs.1 and 2, respectively.

443

##### 444 4.1.Hydrochemical characteristics of natural the ground and surface waters in the Otindag

445 The pH values of the water samples studied varied from 6.26 to 9.44 (except sample p1,  
446 precipitation, 4.61)(Table 1). with a median value of 7.27, indicating that the waters are generally  
447 neutral to slightly alkaline. The TDS ranged between 67mg/L and 660 mg/L (average 211 mg/L) (Table  
448 1), all belonging to fresh water (TDS < 1000 mg/L) in the salination classification of natural water  
449 (Meybeck, 2004). The natural water samples collected in this study are generally neutral to slightly  
450 alkaline, with the pH values varying between 6.26 and 9.44 (except the precipitation sample p1, 4.61)  
451 (Table 1) and a median value of 7.27. The TDS values range between 67 and 660 mg/L (average 211  
452 mg/L) (Table 1), all belonging to fresh water(TDS < 1000 mg/L) in the salination classification of  
453 natural water (Meybeck, 2004).

454 The variations in ion concentrations of the major cations and anions in the studied water samples  
455 were displayed in a Schoeller diagram (Schoeller, 1955), a fingerprint diagram with a semi-logarithm  
456 of y-axis (Fig. 35). The rain water sample is the most depleted in ions among these samples. In general,  
457 the groundwater samples have had the highest concentrations of cations and anions, while the  
458 precipitation sample (p1) had the lowest concentrations, and the lake, river and spring waters had  
459 intermediate the medium-values. The calcium concentration is was the highest among incations in  
460 almost all of the water samples, and the  $\text{HCO}_3 + \text{CO}_3$  concentration (bicarbonate + carbonate, alkalinity)  
461 is was the highest among inanions in most of the water samples. For, except for several groundwater  
462 samples (g3, g4, g5, g6 and g11), and one of the spring sample (s1) and the precipitation sample (p1),  
463 they have which had the higher  $\text{SO}_4$  concentrations than the alkalinity (Fig. 53).

464 Two chemically distinct water types are recognized for the studied waters in via a Piper diagram  
465 (Fig. 6)(Piper, 1944), calcium bicarbonate and calcium sulphate (Fig. 4). The relative differences in  
466 abundance of ion concentrations between different waterscan be detectablerevealed in a Piper  
467 diagram(Piper, 1944).The water samples studied can be classified into two water types in the Piper  
468 diagram (Fig. 4). I, type I, the  $\text{Ca-HCO}_3$  water, which generally represents the typical bicarbonate  
469 water experiencedaffected bynear surface mineral weathering, and type II, the  $\text{Ca/Mg-SO}_4$  water, which  
470 indicates saline waterdominated by alkaline earth metals (Zhu et al., 2011, 2012; Clark, 2015). For  
471 water type I, the weak acids exceededthe strong acids; the carbonate hardness (secondary alkalinity)  
472 exceeded 50% and was dominated by the alkaline earths. While for water Type II, the strong acids  
473 exceededthe weak acids andno carbonate hardness exceeded 50%. The alkaline earths (Ca+Mg)  
474 exceeded the alkalis (Na+K) in all the water samples studied. There were nNo any Chloride-type and  
475 sodiumNa-type waters occurring in the study area (Fig. 64). Based on more than 10,000 chemical

带格式的: 无下划线, 字体颜色: 自动设置

带格式的: 无下划线, 字体颜色: 自动设置, 图案: 15% (自动设置前景, 白色 背景)

带格式的: 无下划线, 字体颜色: 自动设置

analyses of groundwater samples from the world, Chebotarev (1955) observed that the global groundwater tends to evolve chemically towards the composition of seawater. He also observed that this evolution is associated with regional changes in dominant anions but not cations, as the concentration of cations may exhibit a wide range of fluctuations in groundwater and is not as steady as the changes in anion dominance. Freeze and Cherry (1979) illustrated the Chebotarev's (1955) general evolution of groundwater as a anion evolution line:  $\text{HCO}_3^- \rightarrow \text{HCO}_3^- + \text{SO}_4^{2-} \rightarrow \text{SO}_4^{2-} + \text{HCO}_3^- \rightarrow \text{SO}_4^{2-} + \text{Cl}^- \rightarrow \text{Cl}^- + \text{SO}_4^{2-} \rightarrow \text{Cl}^-$ , which travels along the flow paths and increasing ages. On this evolution line, bicarbonate water is generally characteristic of low salinity, renewable water resources and low residence time, while sulphate waters predominate in groundwater passing through gypsum and anhydrite aquifers, and is usually associated with intermediate salinity in unconfined aquifers (Clark, 2015). The distribution pattern of water chemical types occurred in the studied area indicates a primary stage of groundwater evolution for natural waters in the Otindag Desert, in terms of the hydrogeochemical perspective.

The hydrochemical facies of the studied water samples can be further illustrated by an Durov diagram (Durov, 1948) and its expanded models (Lloyd and Heathcote, 1985; Al-Bassam et al., 1997; Chadha, 1999; Al-Bassam and Khalil, 2012). All the groundwater and spring water samples in this study fell into the Durov fields 1, 4 and 5 of the expanded Durov diagram (Fig. 5). The water samples in the Durov field 1 were actually the same than to those classified into the Piper water type 1 (Fig. 4), while samples in the Durov fields 4 and 5 were the same than those of the Piper water type II (Fig. 4). Based on the graphic decipherment of Lloyd and Heathcote (1985), water samples in field 1 represent the presence of  $\text{HCO}_3^-$  and  $\text{Ca}^{2+}$  dominant water type, while samples in field 4 indicate the  $\text{SO}_4^{2-}$  dominant (or anions indeterminate) and  $\text{Ca}^{2+}$  dominant water type, and samples in field 5 represent the water type without any dominant anion or cation. All the groundwater and spring water samples in this study were distributed close to the line of simple dissolution or mixing process. However, almost all the river and lake water samples were located in the Durov field 2 and were close to the line of ion exchange process (Fig. 5). These distribution patterns indicated that the ground waters and the surface waters had experienced different geochemical processes in the formation and evolution of natural waters in the Otindag.

#### 4.2. The stable and radioactive isotopic compositions of natural waters in the Otindag

If we plot the relationships between oxygen and hydrogen isotopes of groundwater, spring, river water and lake water, we find that they are distributed between two straight lines with a gradient of 4.4, but with different y intercepts (Fig. XX), as shown in the following equations:

$$\delta D = 4.38\delta^{18}\text{O} - 24.97 (R^2 = 0.87, n = 11) \text{ for groundwater samples.}$$

$$\delta D = 4.44\delta^{18}\text{O} - 24.56 (R^2 = 0.86, n = 13) \text{ for groundwater and spring water samples.}$$

$$\delta D = 4.09\delta^{18}\text{O} - 28.31 (R^2 = 0.93, n = 24) \text{ for groundwater, spring water, river water and lake water samples.}$$

$$\delta D = 7.95\delta^{18}\text{O} + 10.52 (R^2 = 0.77, n = 5) \text{ for river water samples.}$$

$$\delta D = 2.69\delta^{18}\text{O} - 33.94 (R^2 = 0.92, n = 6) \text{ for lake water samples.}$$

$$\delta D = 6.57\delta^{18}\text{O} - 0.31 (R^2 = 0.88, n = XX) \text{ for precipitation water in the Tianjin Station.}$$

带格式的: 无下划线, 字体颜色: 自动设置, 下标

带格式的: 无下划线, 字体颜色: 自动设置, 上标

带格式的: 无下划线, 字体颜色: 自动设置

带格式的: 无下划线, 字体颜色: 自动设置, 下标

带格式的: 无下划线, 字体颜色: 自动设置, 上标

带格式的: 无下划线, 字体颜色: 自动设置

带格式的: 无下划线, 字体颜色: 自动设置, 上标

带格式的: 无下划线, 字体颜色: 自动设置

带格式的: 无下划线, 字体颜色: 自动设置, 图案: 清除

带格式的: 无下划线, 字体颜色: 自动设置, 图案: 清除

带格式的: 无下划线, 字体颜色: 自动设置

带格式的: 缩进: 首行缩进: 2 字符

带格式的: 无下划线, 字体颜色: 自动设置

带格式的: 无下划线, 字体颜色: 自动设置

带格式的: 无下划线, 字体颜色: 自动设置

带格式的: 行距: 1.5 倍行距

带格式的: 无下划线, 字体颜色: 自动设置

带格式的: 无下划线, 字体颜色: 自动设置

带格式的: 无下划线, 字体颜色: 自动设置

带格式的: 无下划线, 字体颜色: 自动设置



$\delta D = 6.36 \delta^{18}O - 5.21$  ( $R^2 = 0.93$ ,  $n = XX$ ) for precipitation water in the Baotou Station.  
 $\delta D = 6.86 \delta^{18}O - 2.23$  ( $R^2 = 0.91$ ,  $n = XX$ ) for precipitation water in spring in the Tianjin Station.  
 $\delta D = 6.68 \delta^{18}O - 0.98$  ( $R^2 = 0.93$ ,  $n = XX$ ) for precipitation water in summer in the Tianjin Station.  
 $\delta D = 5.51 \delta^{18}O - 4.13$  ( $R^2 = 0.55$ ,  $n = XX$ ) for precipitation water in autumn in the Tianjin Station.  
 $\delta D = 7.44 \delta^{18}O + 13.57$  ( $R^2 = 0.04$ ,  $n = XX$ ) for precipitation water in winter in the Tianjin Station.  
 $\delta D = 6.66 \delta^{18}O + 0.30$  ( $R^2 = 0.93$ ,  $n = XX$ ) for precipitation water in spring in the Baotou Station.  
 $\delta D = 5.07 \delta^{18}O - 15.1$  ( $R^2 = 0.80$ ,  $n = XX$ ) for precipitation water in summer in the Baotou Station.  
 $\delta D = 6.98 \delta^{18}O - 0.85$  ( $R^2 = 0.95$ ,  $n = XX$ ) for precipitation water in autumn in the Baotou Station.  
 $\delta D = 6.86 \delta^{18}O - 0.72$  ( $R^2 = 0.98$ ,  $n = XX$ ) for precipitation water in winter in the Baotou Station.  
 The stable isotopes of  $\delta^2H$  and  $\delta^{18}O$  were analyzed for all the water samples collected in this study, as shown in Table 3 and Fig. 6. The radioactive isotope of tritium ( $^3H$ ) was analyzed for a part of the groundwater samples.  
 The  $\delta D^2H$  values of the groundwater samples collected in this study varied from -63.42‰ to -75.92‰ (Table 3), with an average -69.53‰. The  $\delta^{18}O$  values ranged between -8.64‰ and -11.26‰ (Table 3), with an average -10.17‰.  
 The spring water samples, which directly drain into rivers, were relatively concentrated in values of  $\delta^2H$  and  $\delta^{18}O$  and were greatly similar to those of the groundwater samples (Fig. 76). The  $\delta^2H$  and  $\delta^{18}O$  values in the spring samples varied from -70.83‰ to -72.60‰ (mean value -71.72‰) and from -10.34‰ to -10.47‰ (mean value -10.40‰), respectively (Table 3).  
 The  $\delta D^2H$  and  $\delta^{18}O$  values in the river water samples were slightly more variable and were also similar to those of the groundwater (Fig. 76), with a range of between -65.00‰ and -85.16‰ (mean value -73.02‰) in  $\delta D^2H$  values and a range of between -9.55‰ and -11.78‰ (mean value -10.51‰) in  $\delta^{18}O$  (Table 3).  
 The lake water samples in this study were enriched in  $\delta^2H$  and  $\delta^{18}O$  by comparison to the groundwater samples (Fig. 6), with a range of between -34.16‰ and -53.13‰ (mean value -46.47‰) in  $\delta^2H$  values and a range of between 0.38‰ and -6.55‰ (mean value -4.65‰) in  $\delta^{18}O$  (Table 3).  
 The precipitation sample p1 was also enriched in  $\delta D$  and  $\delta^{18}O$  by comparison to the groundwater samples (Fig. 76), showed the  $\delta^2H$  value of -47.4‰ and the  $\delta^{18}O$  value of -7.14‰, respectively (Table 3). The content of radioactive isotope of tritium ( $^3H$ ) measured in seven well groundwater samples with 6-60 m depth ranged from 1.86 to 24.35 TU (Table 3), with an average 14.95 TU, higher than the mean tritium concentration (9.8 TU) of groundwater in the Vienna Basin, Austria (Stolp et al., 2010), the seat of the International Atomic Energy Agency (IAEA).  
 If we plot the relationships between oxygen and hydrogen isotopes of groundwater, spring, river water and lake water samples, we observed that the regression line that fits all data points can be

带格式的: 无下划线, 字体颜色: 自动设置

带格式的: 字体颜色: 自动设置

带格式的: 无下划线, 字体颜色: 自动设置

带格式的: 无下划线, 字体颜色: 自动设置

带格式的: 无下划线, 字体颜色: 自动设置

带格式的: 行距: 1.5 倍行距

带格式的: 无下划线, 字体颜色: 自动设置

带格式的: ... [1]

带格式的: ... [2]

带格式的: ... [3]

带格式的: ... [4]

described by the equation:  $\delta D = 4.09\delta^{18}O - 28.31$  ( $R^2=0.93$ ,  $n=24$ ) between two straight lines with a gradient of 4.4, but with different y-intercepts (EL1 in Fig. 76XX), as shown in This local groundwater line (LGWL) is different from the Global Meteoric Water Line (GMWL,  $\delta D = 8\delta^{18}O + 10$ ) and the Mediterranean Meteoric Water Line (MMWL,  $\delta D = 8\delta^{18}O + 20$ ) estimated by Craig (1961), but it is similar to the local groundwater lines established for other deserts in northern China and central Asia with a same slope but different Y-intercepts, such as  $\delta D = 4.17\delta^{18}O - 31.3$  for the Badanjinlin Desert (Jin et al., 2018),  $\delta D = 4.8\delta^{18}O - 15.2$  for the Ejina Desert in China (Wang et al., 2013), and  $\delta D = 4.26\delta^{18}O + 9.23$  for the Rub Al Khal Desert in the United Arab Emirates (Rizk and El-Etr, 1997). The scatter of stable isotope data points for the lake water samples (Fig. 76) in the Otindag suggests that the lake waters are affected by evaporation, but the other waters in the desert are not so. the following equations:

$\delta D = 4.38\delta^{18}O - 24.97$  ( $R^2=0.87$ ,  $n=11$ ) for groundwater samples;

$\delta D = 4.44\delta^{18}O - 24.56$  ( $R^2=0.86$ ,  $n=13$ ) for groundwater and spring water samples;

$\delta D = 4.09\delta^{18}O - 28.31$  ( $R^2=0.93$ ,  $n=24$ ) for groundwater, springer water, river water and lake water samples;

$\delta D = 7.95\delta^{18}O + 10.52$  ( $R^2=0.77$ ,  $n=5$ ) for river water samples;

$\delta D = 2.69\delta^{18}O - 33.94$  ( $R^2=0.92$ ,  $n=6$ ) for lake water samples;

$\delta D = 6.57\delta^{18}O + 0.31$  ( $R^2=0.88$ ,  $n=XX$ ) for precipitation water in the Tianjin Station;

$\delta D = 6.36\delta^{18}O - 5.21$  ( $R^2=0.93$ ,  $n=XX$ ) for precipitation water in the Baotou Station;

$\delta D = 6.86\delta^{18}O - 2.23$  ( $R^2=0.91$ ,  $n=XX$ ) for precipitation water in spring in the Tianjin Station;

$\delta D = 6.68\delta^{18}O - 0.98$  ( $R^2=0.93$ ,  $n=XX$ ) for precipitation water in summer in the Tianjin Station;

$\delta D = 5.51\delta^{18}O - 4.13$  ( $R^2=0.55$ ,  $n=XX$ ) for precipitation water in autumn in the Tianjin Station;

$\delta D = 7.44\delta^{18}O + 13.57$  ( $R^2=0.94$ ,  $n=XX$ ) for precipitation water in winter the Tianjin Station;

$\delta D = 6.66\delta^{18}O + 0.30$  ( $R^2=0.93$ ,  $n=XX$ ) for precipitation water in spring in the Baotou Station;

$\delta D = 5.07\delta^{18}O - 15.1$  ( $R^2=0.80$ ,  $n=XX$ ) for precipitation water in summer in the Baotou Station;

$\delta D = 6.98\delta^{18}O + 0.85$  ( $R^2=0.95$ ,  $n=XX$ ) for precipitation water in autumn in the Baotou Station;

$\delta D = 6.86\delta^{18}O - 0.72$  ( $R^2=0.98$ ,  $n=XX$ ) for precipitation water in winter in the Baotou Station;

The isotopic regression equation of the Otindag evaporation line (EL1) (Fig. 6), which was calculated based on the  $\delta^2H$  and  $\delta^{18}O$  data of the groundwater, lake, river and spring water samples in this study, was  $\delta^2H = 4.09\delta^{18}O - 28.31$  ( $R^2=0.93$ ,  $n=24$ ).

The content of radioactive isotope of tritium ( $^3H$ ) was measured in seven well groundwater samples with 6-60 m depth in this study. The tritium concentrations ranged from 1.86 to 24.35 TU (Table 3), with an average 14.95 TU, higher than the mean tritium concentration (9.8 TU) of groundwater in the Vienna Basin, Austria (Stolp et al., 2010), the seat of the International Atomic Energy Agency (IAEA).

带格式的: 无下划线, 字体颜色: 自动设置

域代码已更改

带格式的: 无下划线, 字体颜色: 自动设置

带格式的: 缩进: 首行缩进: 3 字符

带格式的: 无下划线, 字体颜色: 自动设置

## 5. Discussion

### 4.5.2.1. Evaluation of local precipitation recharge on as a recharge source of groundwater in the Otindag

#### Comparison of the isotopic signals between the modern regional precipitation and natural waters in the Otindag

To incorporate the isotopic analysis of precipitation with similar areas in the studied area, local data (p1) was plotted with those of Baotou (Fig. 76). The isotopic composition of rainfall in Baotou, the nearest long-term station to the Otindag Desert, was monitored for the period 1986-2001 within the scope of the International Atomic Energy Agency/World Meteorological Organization (IAEA/WMO) global survey. The stable isotope data available from this station was used to provide basic characteristics of the stable isotopic composition of the present-day meteoric water, especially in the westward inland areas of the Otindag Desert (Fig. 1). Stable isotope data of the Tianjin station was also used to characterize precipitation of the eastern coastal areas of the Otindag Desert (Fig. 1).

At present, the extensive record of stable isotope measurements from atmospheric precipitation are still lacking from absent in the Otindag. Thus, in this study, we used the decadal isotope data of atmospheric precipitation around the Otindag were collected in this study to determine the isotopic relationship between the local groundwater and the regional precipitation that are available from. A global database, the IAEA Global Network of Isotopes in Precipitation (GNIP) database, is available to use in this study. Taking into account the boundary between the northern hemispheric westerly and the Asian summer monsoon (Chen et al., 2010), which are the two major climate systems controlling the Otindag (Yang et al., 2013), we chose two GNIP meteorological stations as the representations of the atmospheric precipitation derived from the northern hemispheric westerly and the Asian summer monsoon, respectively. One is the Baotou station, located to the southwest of the Otindag as representative of (the westerly system), and another is the Tianjin station, located to the southeast of the Otindag, as representative of (the Asian summer monsoon system) (Fig. 1a). The historical isotopic data ( $\delta^2\text{H}$ ,  $\delta^{18}\text{O}$  and  $\delta^{15}\text{N}$ , ‰ VSMOW) over the last four decades from the two stations, as well as other data including the daily precipitation amount (mm) and air temperature ( $^{\circ}\text{C}$ ) in the same period, were taken as the references of the stable isotopic signals in precipitation in the Otindag.

The annual weighted mean values of  $\delta^2\text{H}$  and  $\delta^{18}\text{O}$  at the Baotou station varied were variable from -64.32‰ to -48.44‰ and from -9.40‰ to -6.50‰ during the period of 1986 to 1992, respectively. The annual weighted mean values of  $\delta^2\text{H}$  and  $\delta^{18}\text{O}$  at the Tianjin station varied from -56.30‰ to -43.72‰ and from -8.35‰ to -6.86‰ during the period of 1988 to 1992 and of 2000 to 2001, respectively. The long-term weighted mean values of  $\delta^2\text{H}$  and  $\delta^{18}\text{O}$  at the Baotou station (LWMB) were -55.27‰ and -7.78‰, respectively, and were -49.97‰ and -7.70‰ at the Tianjin station (LWMT), respectively. The radioactive isotope of  $^3\text{H}$  (TU) in precipitation was not stable at the GNIP Baotou station. The annual weighted mean values were higher than 30 TU in this station and tended to be decreased from 1986 to 1991 (72.06, 57.81, 59.97, 52.79, 55.89, 34.35 TU, respectively). The annual weighted mean values of  $^3\text{H}$  at the GNIP Tianjin station were lower than those of the Baotou station. The mean values were 21.99, 21.65, 18.55, 25.72, 18.80 TU from 1988 to 1992, and 7.01 and 15.48 TU from 2000 to 2001.

带格式的: 无下划线, 字体颜色: 自动设置

带格式的: 无下划线, 字体颜色: 自动设置

带格式的: 无下划线, 字体颜色: 自动设置, 图案: 15% (自动设置前景, 白色 背景)

带格式的: 图案: 15% (自动设置前景, 白色 背景)

带格式的: 无下划线, 字体颜色: 自动设置

As the sample p1, the only one precipitation sample collected in this study (during the 2011 summer rainfall event) of the Otindag, the sample p1 fell onto the Global Meteoric Water Line (GMWL:  $\delta^2\text{H} = 8\delta^{18}\text{O} + 10$ ) estimated by Craig (1961). It showed similar  $\delta^2\text{H}$  and  $\delta^{18}\text{O}$  values to those of the precipitation collected in the GNIP stations of Baotou and Tianjin (Fig. 6).

Compared to the precipitation data from the GNIP Baotou and Tianjin stations and from the local precipitation (p1) in the Otindag, the groundwater samples were evidently depleted in heavy stable isotopes in the Otindag HSKDSL (Fig. 6).

In contrast to the precipitation data, the water samples from springs and rivers in the study area also showed a depletion characteristics in the stable isotopes of  $\delta^2\text{H}$  and  $\delta^{18}\text{O}$  (Fig. 6).

Based on the isotopic data from the Baotou station, the local regional meteoric water lines, i.e., the regional Craig lines, can be statistically described expressed as the isotopic regression equation of  $\delta^2\text{H} = 6.36\delta^{18}\text{O} - 5.21$  (line-LMWL-B). It can also, based on the isotopic data from the Baotou station, and can be described expressed as  $\delta^2\text{H} = 6.57\delta^{18}\text{O} + 0.31$  (line-LMWL-T), based on the data from the Tianjin station (Fig. 76). The precipitation sample p1 collected in this study fell onto the GMWL (Fig. 7). It also showed similar  $\delta^2\text{H}$  and  $\delta^{18}\text{O}$  values to those of the precipitation collected in the GNIP stations of Baotou and Tianjin (Fig. 76).

Compared to the precipitation data from the GNIP stations and from the local precipitation (p1), the groundwater, spring, and river water samples were evidently depleted in heavy stable isotopes in the Otindag (Fig. 76). Except for the lake water samples, most of the groundwater, river water and spring water samples in the Otindag fall on or lay between the LMWL-B and the LMWL-T lines, and are located at the lower left area of the precipitation points (Fig. 76). This indicates that no strong deep evaporation process was experienced by these ground and surface waters (except for lake waters) compared with the precipitation.

For the Otindag evaporation line (EL1), its equation slope and intercept were significantly lower than that of the GMWL, LMWL-B and LMWL-T (Fig. 6). The points of intersection between the EL1 and LMWL-B were at was 69.93% for  $\delta^2\text{H}$  and 10.18% for  $\delta^{18}\text{O}$ , respectively, while the intersection points between the EL1 and LMWL-T were at was 75.51% for  $\delta^2\text{H}$  and 11.54% for  $\delta^{18}\text{O}$ , respectively.

## 5.2. The direct recharge of groundwater in the eastern Otindag

Water infiltration of atmospheric precipitation through the unsaturated zone to groundwater is hydrologically defined as the direct recharge. The deuterium and oxygen isotopes are the composition of water molecules and are sensitive to physical processes such as mixing and evaporation, hence they are ideal tracers of the origin of groundwater (Coplen, 1993; Scanlon et al., 2006). We used them to identify the contribution of precipitation recharge on groundwater in this study.

Because the annual mean precipitation amount in the semi-arid regions of northern China is between 200–400 mm, it seems that the direct recharge on groundwater cannot be neglected in the eastern Otindag under a semi-arid climate. However, when we checked the stable isotopic data from the GNIP stations both at the Baotou and Tianjin, we observed that almost all the annual weighted mean values of the stable isotope contents in precipitation were enriched in  $\delta^2\text{H}$  and  $\delta^{18}\text{O}$  compared with the

带格式的: 无下划线, 字体颜色: 自动设置

带格式的: 字体: (默认)+西文正文, 五号, 无下划线, 字体颜色: 自动设置

带格式的: 行距: 1.5 倍行距

带格式的: 无下划线, 字体颜色: 自动设置

带格式的: 无下划线, 字体颜色: 自动设置, 图案: 15% (自动设置前景, 白色 背景)

带格式的: 无下划线, 字体颜色: 自动设置

带格式的: 无下划线, 字体颜色: 自动设置

带格式的: 无下划线, 字体颜色: 自动设置

带格式的: 无下划线, 字体颜色: 自动设置

those values measured for the groundwater, spring water and river water samples in this study (Fig. 6). Because the isotopic evolution of  $\delta D^2H$  and  $\delta^{18}O$  in water illustrated in the Craig line represents a one-way and irreversible process, thus the water bodies distributed at the upper right area of the Craig line can not be recharge sources for the water bodies distributed at the lower left area of the line. Such results indicated that the groundwater, river water and spring water in the Otindag ~~are were~~ not recharged by the regional precipitation, namely no significant modern direct recharge has taken place for groundwater in the Otindag.

Dogramaci et al. (2012) documented that only ~~the~~ intense and remarkable rainfall events of  $>20$  mm could remarkably recharge groundwater in the semi-arid Hamersley Basin of northwest Australia, while the rainfall events  $<20$  mm had limited influences on groundwater recharge. Chen et al. (2014) described that rainfall events  $\leq 5$  mm in the arid and semi-arid region of northern China would be evaporated into the atmosphere rapidly before it is infiltrated into the groundwater system. Based on the analysis on the data records from two meteorological stations around the Otindag, i.e. the Duolun station and the Xilinhaote stations (see Fig. 1a), we observed that the average times of rainfall events being  $>20$  mm on average in amount were only occur 2.5-3.4 times per year (Table 4). In some years (e.g. from 2005 to 2007 at the Xilinhaote Station), no Even none of the rainfall events of  $>20$  mm even occurred during the year from 2005 to 2007 at the Xilinhaote Station. It further indicated confirmed that the small amounts of intensive rainfall events had limited the contribution of regional precipitation on groundwater recharge in the Otindag.

In addition to groundwater, the river water and spring water samples from the the Otindag had the similar isotopic signals with those of groundwaters, and were also deviated from the local modern regional precipitation in the Craig diagram (Fig. 76). These water samples came from the Xilamulun, Shepi and Tuligen rivers. They shared the same evaporation line (EL1) with the groundwater and lake water samples (Fig. 76). Generally speaking, natural waters that have a same recharge source are can be distributed on a same line of evaporation in the  $\delta^2$  and  $\delta^{18}O$  diagram (Chen et al., 2012b) (Chen et al., 2012b). This indicates that the recharge sources of groundwater, river water, spring water and lake water in the Otindag are were genetically associated each other and were differ from ential to the local regional precipitation. During the field investigation, we observed that the elevation of spring outflow was lower than that of the groundwater table in some areas. This implies yed that the spring water can be originated from the local phreatic water (groundwater). The same isotopic signals between the two kinds of water confirmed their close relationship in origin.

#### 45.33. Winter precipitation and palaeowater recharge on groundwater in the Otindag

##### Potential sources of groundwater other than summer precipitation in the Otindag: three hypotheses

Since the groundwater samples in the Otindag ~~are were~~ depleted in their  $\delta D^2H$  and  $\delta^{18}O$  values even more than those of the modern local rainfall (Fig. 76), they must be sourced from other waters characterized by similar with same or more depleted signals in their stable isotopes compositions. Due to the temperature effect (such as evaporation) on isotopic fractionation, only the waters issued from colder environments can be more depleted in their  $\delta D$  and  $\delta^{18}O$  values even more than those of the

带格式的: 字体: (默认) + 西文正文, 五号, 无下划线, 字体颜色: 自动设置, 检查拼写和语法

带格式的: 缩进: 首行缩进: 2 字符

带格式的: 无下划线, 字体颜色: 自动设置

带格式的: 字体: (默认) + 西文正文, 五号, 无下划线, 字体颜色: 自动设置, 检查拼写和语法

带格式的: 无下划线, 字体颜色: 自动设置



local rainfall.

Because the Otindag Desert is under the control of the EASM climate (Fig. 1), the local rainfall in the desert is mainly sourced from summer precipitation. This can also be illustrated by the seasonal distributions in annual mean precipitation (Fig. 87a), in annual mean air temperature (Fig. 87b) and in annual mean water vapor pressure (Fig. 87c) over the last forty years at the two surrounding GNIP weather stations in Baotou and Tianjin.

Climatically (Because the Otindag Desert is under the control of the East Asian Summer Monsoon climate (Yang et al., 2013), thus the local modern rainfall in the desert is mainly sourced from the summer season's precipitation, with rain and heat over the same period. These climatic characteristics were illustrated by the seasonal distributions of the annual mean precipitation amount (Fig. 7a), the annual mean air temperature (Fig. 7b) and the annual mean water vapor pressure (Fig. 7c) over the last forty years at the two surrounding GNIP weather stations in the Baotou and Tianjin. The seasonal distributions of stable isotopes in the two stations (Fig. 8d-e) show that the records indicate that the summer rainfall is warmer and evidently relatively positive in its signals of  $\delta D^2H$  and  $\delta^{18}O$  by comparison with those of the winter rainfall, further suggesting that the waters issued from cold environments can be more depleted in their  $\delta D$  and  $\delta^{18}O$  values than those of the summer rainfall. The waters originated in a colder environment, due to the evaporation effect on isotopic fractionation. It is thus speculated that the potential water sources of groundwater in the Otindag can be potentially must be derived from waters originated in a colder environment, such as (1) the modern precipitation in winter, (2) the palaeowater formed in the past glacial period, or (3) remote/the mountains waters that emanate in with colder and wetter conditions.

Given the hypothesis (1) "the modern winter precipitation", we can get clues from the isotopic records of winter precipitation in the Baotou and Tianjin stations. It is shown that the annual mean values of  $\delta D^2H$  and  $\delta^{18}O$  over the last forty years were more depleted in the winter precipitation than in the summer precipitation at the Baotou and Tianjin stations (Fig. 8d-e). This isotopic signal qualifies the suggested that the regional winter precipitation to be was qualified to be a potential source of groundwaters in the Otindag. However, the limited water amount of the winter precipitation in these regions seemed to be a question towards its importance as an efficient source of groundwater because the precipitation amounts and the water vapor pressures (effective moisture) in the winter months were much lower than those in the summer months at both the Baotou and Tianjin stations (Fig. 87a and 87cd). It indicates that the winter seasons in these regions were relatively colder and drier but not colder and wetter. A colder-wetter pattern of winter season precipitation is a necessary condition for winter precipitation to be as a water source for the formation of groundwater under a summer monsoon climate. This is because the bigger amounts of summer precipitation will easily remove or weaken the depleted isotopic signals of winter precipitation in groundwater. In this regard, view of this consideration, the modern winter precipitation is unlikely to might not be an important source of groundwater in the Otindag. The hypothesis (1) can be neglected.

As to the hypothesis (2) "the palaeowaters" formed in colder and wetter periods such as the last glacial<sup>22</sup>, it has been proposed to be a potential water source for groundwaters in the wide arid lands of the world. In fact, the depleted signals of stable isotopes ( $\delta D^2H$  and  $\delta^{18}O$ ) in groundwater have been

带格式的: 无下划线, 字体颜色: 自动设置

带格式的: 无下划线, 字体颜色: 自动设置

带格式的: 无下划线, 字体颜色: 自动设置, 图案: 清除

带格式的: 无下划线, 字体颜色: 自动设置

带格式的: 无下划线, 字体颜色: 自动设置, 图案: 清除

带格式的: 无下划线, 字体颜色: 自动设置

带格式的: 无下划线, 字体颜色: 自动设置, 图案: 清除

带格式的: 无下划线, 字体颜色: 自动设置

带格式的: 无下划线, 字体颜色: 自动设置, 图案: 清除

带格式的: 无下划线, 字体颜色: 自动设置

带格式的: 无下划线, 字体颜色: 自动设置, 图案: 清除

带格式的: 无下划线, 字体颜色: 自动设置

带格式的: 无下划线, 字体颜色: 自动设置, 图案: 15% (自动设置前景, 白色背景)

带格式的: 无下划线, 字体颜色: 自动设置

带格式的: 无下划线, 字体颜色: 自动设置, 图案: 15% (自动设置前景, 白色背景)

带格式的: 无下划线, 字体颜色: 自动设置

带格式的: 无下划线, 字体颜色: 自动设置, 图案: 15% (自动设置前景, 白色背景)

带格式的: 无下划线, 字体颜色: 自动设置

带格式的: 无下划线, 字体颜色: 自动设置

recognized in global arid and semi-arid regions, such as the Sinai Desert in Egypt (Gat and Issar, 1974) (Gat and Issar, 1974), Israel (Gat, 1983) (Gat, 1983), South Australia (Love et al., 1994, 2000) (Love et al., 1994, 2000), northern China (Ma et al., 2010) (Ma et al., 2010), Saudi Arabia (Bazuhair and Wood, 1996) and North Africa (Moser et al., 1983; Guendouz et al., 2003). These signals are very often explained as palaeo-groundwater that recharged by precipitation during past wetter and colder periods (Love et al., 1994, 2000; Herczeg and Leaney, 2011) (Love et al., 1994, 2000; Herczeg and Leaney, 2011). Gat and Issar (1974) reported that palaeowaters played a central role in the deep aquifers of the Sinai Desert, with the evidence that groundwater stable isotope compositions ( $\delta^{18}\text{O}$  and  $\delta\text{D}^3\text{H}$ ) were more negative than those of weighted mean contemporary rainfall. Ma et al. (2010) presented data from groundwater in the aquifer of Jinchang city and the adjacent Gobi desert areas in northern China, which showed that palaeowaters were depleted in  $^{18}\text{O}$  and  $^3\text{H}$  relative to modern precipitation in the same region.

In order to identify the role of palaeowater recharge on groundwater in the Otindag, Here we use the tritium data as a environmental tracer to estimate the groundwater age in the Otindag. The half life of tritium is 12.43yr. Based on this decay time and the tritium concentrations in groundwater, the exponential decay equation can be used to provide a qualitative age indication to interpretate the regional groundwater flow system (Ma et al., 2010). Due to the lack of tritium data of local precipitation in the Otindag, we still used the tritium data at the GNIP stations of the Baotou and Tianjin are also referenced as the background values in precipitation of recent years.

A "piston model (flow)" was used to evaluate the residence time of groundwater in aquifer and the residual tritium of a water body can be calculated by  $N = N_0 e^{-\lambda t}$  (Yang and Williams, 2003). Where  $N$  = content of residual tritium in water sample,  $\lambda = 0.0565$ , the radioactive decay constant,  $N_0$  = content of tritium at the time of rainfall and  $t$  = years after precipitation. Based on this equation, the residual tritium was theoretically calculated and the standard for tritium dating was established for. In this study, the content of tritium was measured for seven groundwater samples in the Otindag Desert (Table 3). As a result, all of which were taken from the wells in the Otindag dune field. To the extent that the input function and piston model are reasonable approximations, ages of 0-60 years were obtained for these groundwater samples (Table 5). This which indicates that recent recharge took place several decades after the peak in global nuclear tests had been several decade years underway. Based on the relatively high tritium contents and the calculated datings of the groundwater samples in this study (Table 5), We thus concluded that groundwater is generally not older than 70 years in the study area. It means The hypothesis (2) that the groundwater in the Otindag are not were palaeowater recharged during glacial period in the Otindag is not valid.

Both the modern summer and winter precipitation recharge and the palaeowater recharge can be the hypotheses (1) and (2) refuted, were proved to be valid, indicating ing that the direct recharge is not a major mechanism controlling the groundwater recharge in the Otindag.

#### 45. 44. Remote waters recharge on groundwater in the Otindag: Dali Basin

##### The indirect recharge of groundwater in the eastern Otindag?

Through the above analysis, it seemed that the modern winter meteoric water was not a

带格式的: 无下划线, 字体颜色: 自动设置, 图案: 15% (自动设置 前景, 白色 背景)

带格式的: 无下划线, 字体颜色: 自动设置

带格式的: 无下划线, 字体颜色: 自动设置

带格式的: 无下划线, 字体颜色: 自动设置

带格式的: 字体: (默认) + 西文正文, 五号, 无下划线, 字体颜色: 自动设置, 检查拼写和语法, 图案: 15% (自动设置 前景, 白色 背景)

带格式的: 图案: 15% (自动设置 前景, 白色 背景)

带格式的: 无下划线, 字体颜色: 自动设置, 图案: 15% (自动设置 前景, 白色 背景)

带格式的: 无下划线, 字体颜色: 自动设置

带格式的: 无下划线, 字体颜色: 自动设置, 图案: 15% (自动设置 前景, 白色 背景)

带格式的: 无下划线, 字体颜色: 自动设置

带格式的: 无下划线, 字体颜色: 自动设置, 图案: 15% (自动设置 前景, 白色 背景)

带格式的: 无下划线, 字体颜色: 自动设置

带格式的: 无下划线, 字体颜色: 自动设置, 图案: 15% (自动设置 前景, 白色 背景)

带格式的: 无下划线, 字体颜色: 自动设置

带格式的: 无下划线, 字体颜色: 自动设置, 图案: 15% (自动设置 前景, 白色 背景)

带格式的: 无下划线, 字体颜色: 自动设置

带格式的: 无下划线, 字体颜色: 自动设置, 图案: 15% (自动设置 前景, 白色 背景)

带格式的: 无下划线, 字体颜色: 自动设置

volumetrically important source of groundwater in the Otindag, and the groundwater was not recharged by palaeowaters. Thus, the third hypothesis that “remote/the mountains waters emanate under with colder and wetter conditions” is further should be considered here as a key source of groundwater in the Otindag. In essence, it is an indirect recharge mechanism, as the indirect recharge is defined as as water originates from remote areas (Healy, 2010; Herczeg and Leaney, 2011) (Healy, 2010) and it generally occurs through rivers, canals, lakes and flash floodings (Herczeg and Leaney, 2011).

It is worth noting that the values of deuterium and oxygen-18 in the groundwater samples of the eastern Otindag were variable. These values for groundwater in the north part of the study area were more depleted in  $\delta D^2H$  and  $\delta^{18}O$  than those in the south part (Table 3). It suggests that the Otindag groundwater in the study area might be potentially recharged by water resources coming from the northern neighboring catchment of the eastern Otindag, such as the Dali Basin.

In order to estimate the potential linkage between the eastern Otindag and the Dali Basin, Recently published data of  $\delta D$  and  $\delta^{18}O$  deuterium and oxygen-18 in groundwaters, lake waters, river waters and spring water sampled from the Dali Basin (e.g., Chen et al., 2008; Zhen et al., 2014) were compiled collected in this study and were co-analyzed with the data from the Otindag.

In total, There were totally about 70 natural water samples from the Dali and Otindag with  $\delta D^2H$  and  $\delta^{18}O$  values are being shown in a Craig diagram (Fig. 9). As a result, All of these samples fell on or lied near the evaporation line EL2 in the Craig diagram (Fig. 9), with a regression equation of  $\delta D^2H = 4.81\delta^{18}O - 21.55$  and a high correlation coefficient ( $R^2 = 0.98$ ,  $n = 70$ ) than that of EL1 ( $R^2 = 0.93$ ,  $n = 24$ ) for the Otindag samples.

Compared to the groundwater samples in the Otindag, water samples from the groundwaters, rivers and springs from the Dali Basin were more depleted in  $\delta^{18}O$  and  $\delta D^2H$  (Fig. 9). Such results further indicate that, in terms of its isotopic signature perspective, the groundwater in the eastern Otindag has a close relationship with the natural waters in the Dali Basin, except for the lake water in Dali. It seems that the Dali water is a potential source for groundwater in the Otindag, or both of them are recharged by a common source derived from surrounding mountains.

#### 5.4.1. Linkage of the river water in the Dali and the groundwater in the Otindag

The similar signals of  $\delta D$  and  $\delta^{18}O$  deuterium and oxygen-18 between the groundwater in the Otindag and the river water in the Dali (Fig. 9) point towards the gave us a possible idea that the groundwater in the Otindag might be sourced from the river water in the Dali Basin, since the Dali has more depleted isotopic signals in water than the Otindag (Fig. 9).

Considering Regarding to the topographical gradient of the elevations between the two regions, however, river water in the Dali Basin cannot flow into the eastern Otindag, because the terrain elevation of the Dali Basin is lower than that of the Otindag (Fig. 1). This is also the reason why the huge Dali Lake is formed that lies in the Dali Basin has no equivalent but not in the Otindag (Fig. 1). If there is a hydraulic linkage between the two regions, water should flow from the Otindag into the the Dali, but not conversely.

A hypothesis that water flows from the Otindag into the Dali Lake has also been proposed by Yang et al. (2015). They argued that a mega palaeolake in Dali, who was almost twice the size of the

带格式的: 无下划线, 字体颜色: 自动设置, 图案: 清除

带格式的: 无下划线, 字体颜色: 自动设置

带格式的: 无下划线, 字体颜色: 自动设置, 图案: 15% (自动设置前景, 白色 背景)

带格式的: 无下划线, 字体颜色: 自动设置

带格式的: 无下划线, 字体颜色: 自动设置

带格式的: 无下划线, 字体颜色: 自动设置, 图案: 清除

带格式的: 无下划线, 字体颜色: 自动设置

带格式的: 无下划线, 字体颜色: 自动设置

带格式的: 无下划线, 字体颜色: 自动设置, 图案: 15% (自动设置前景, 白色 背景)

带格式的: 无下划线, 字体颜色: 自动设置

带格式的: 无下划线, 字体颜色: 自动设置

带格式的: 无下划线, 字体颜色: 自动设置, 图案: 15% (自动设置前景, 白色 背景)

带格式的: 无下划线, 字体颜色: 自动设置

带格式的: 无下划线, 字体颜色: 自动设置, 图案: 15% (自动设置前景, 白色 背景)

带格式的: 图案: 15% (自动设置前景, 白色 背景)

带格式的: 无下划线, 字体颜色: 自动设置

带格式的: 无下划线, 字体颜色: 自动设置

带格式的: 无下划线, 字体颜色: 自动设置

带格式的: 无下划线, 字体颜色: 自动设置



present Dali Lake in area, was recharged by river systems to its south in the Otindag ca. 4,200 years ago. After that, due to the catastrophic decrease in precipitation that occurred in monsoonal regions being experienced catastrophic precipitation decreasing and the groundwater in Otindag being sappinged and captured of the Otindag groundwater by the Xilamulun River flowing eastward, the Otindag's water was no longer recharging the megalake Dali and left a palaeo channel between the two regions (Fig. 2). Since then the connection between surface waters in the two regions has been halted was broken.

In view of the hydraulic gradient, river water in the Dali Basin could not be a recharge source for groundwater in the Otindag. However, in view of the isotopic gradients, groundwater in the Otindag could not conversely be the source of river water in the Dali. ~~at present, due to the more depleted values of deuterium and oxygen-18 in Dali than in Otindag~~ (Fig. 9). Thus, the similar isotopic signals between the river water in Dali and the groundwater in Otindag indicated that these waters might be recharged from a common source.

#### 5. 4. 2. Linkage of groundwaters between the Otindag and the Dali

Similar isotopic signals also occurred in the groundwaters between the Otindag and the Dali Basin (Fig. 9). ~~The linkage of groundwaters between the two regions is still unknown at present.~~ In order to understand the linkage of groundwaters between the two regions, ~~answer this question, we need to know~~ the potential movement of groundwater in the transition zone of the two regions ~~need to be known.~~

~~Due to the inherent difficulties to directly observe groundwater movement along its hydraulic gradient under ground, inert isotopic and hydrochemical tracers are often used to identify groundwater movement (Nakaya et al., 2007), such as chloride, TDS and H-O isotopes, which are used as environmental fingerprints to indicate groundwater movement in arid lands (Yang and Williams, 2003). In a theoretical line of groundwater evolution, the chloride in water is readily removed from matrix materials rather than being precipitated due to its high solubility, thus chloride concentrations tend to be increased with the increasing of the flow path's length and residence time of groundwater (Lloyd and Heathcote, 1985). The TDS has a similar trend with chloride in groundwater evolution, but its tendency might be disturbed due to potential precipitation of certain ions when reaching their saturation conditions. According to the salination classification of water, all the groundwater samples collected in this study are fresh water in type (TDS < 1000 mg/L). Thus evident precipitation of major ions can be considered as could be weak in the Otindag groundwaters.~~

In this study, a groundwater-sampling project was designed in the field along a N-S section of a palaeo-channel located at the transition zone between the Dali and Otindag (Figs. 1, 2). The channel is located near the south distal reach of the Xilamulun River and was named "PCSX" in this study, with its north part of the channel named "as-NPCSX" and is located at the riverhead of the Xilamulun River and the south part named "as-SPCSX" is close to the eastern margin of the Yinshan Mountains (Figs. 1, 2).

Regarding to the topographical gradient in the Otindag, the GPS elevation of the northernmost sampling site in the NPCSX (g11, about 1317 m a.s.l.) was much lower than that of the southernmost

带格式的: 无下划线, 字体颜色: 自动设置

带格式的: 无下划线, 字体颜色: 自动设置, 图案: 15% (自动设置前景, 白色背景)

带格式的: 无下划线, 字体颜色: 自动设置

带格式的: 无下划线, 字体颜色: 自动设置

带格式的: 无下划线, 字体颜色: 自动设置

带格式的: 无下划线, 字体颜色: 自动设置, 图案: 15% (自动设置前景, 白色背景)

带格式的: 无下划线, 字体颜色: 自动设置

带格式的: 无下划线, 字体颜色: 自动设置

带格式的: 无下划线, 字体颜色: 自动设置

带格式的: 无下划线, 字体颜色: 自动设置

site in the SPCSX (g1, 1396 ma.s.l.) (Fig. 2 and Table 1). Regarding to the topographical gradient in the channel, there is a drop of It is about an 80 m-meter drop between the NPCSX and the SPCSX. Under such slope, the underground hydraulic gradient for groundwater flow can be roughly parallel with that of the surface water flow, namely that the groundwaterflow should move downwards from the SPCSX area into the NPCSX area. Thus we can speculate that groundwater in the NPCSX would have higher salinity concentration values of chloride and TDS in concentration than those in the SPCSX under such flowing direction, if the groundwater was flowing from the SPCSX to the NPCSX.

In order to verify check up this speculation, the actual variations of water the salinity environmental tracers (chloride and TDS) were detected along the PCSX section. The sampling site g1 was defined as the initial point and the distances between g1 and other sampling sites along the PCSX section were calculated, based on their GPS geographical coordinates records measured in the field. The results are were shown in Fig. 10a-b. It is was very clear that the variations of chloride and TDS concentrations in groundwater did not increase along the palaeo-channel from south to north (Fig. 10a-b). On the contrary, both the values of chloride and TDS are were lower in the NPCSX area than those in the SPCSX area. Such kind of spatial variations in the chloride and TDS values was contradict ed to the speculated patterns abovementioned, suggesting that the hydraulic gradient of groundwater flowing path in this region is not controlled by the topographical gradient between the NPCSX and SPCSX areas.

a complicated movement of groundwater in the study area. It also indicated that the hydraulic linkage was weak in the groundwaters between the NPCSX and SPCSX areas.

The stable and radioactive isotopic data were also used here as tracers to differentiate the groundwaters between the two regions. Before we use the stable isotopic signals, however, it is necessary to think about the effect of evaporation process on the fractionation of stable isotopes. During the evaporation process, dissolved chloride, the conservative ion, will be enriched along with the heavy isotopes, which is manifested as a correlation between the chloride concentration and the deuterium content in groundwater (Sklash and Mwangi, 1991; Taylor and Howard, 1996). Based on this consideration, a bivariate diagram can be was built using the chloride and deuterium data of the groundwater samples in this study, as shown in Fig. 11. The groundwater samples from the PCSX section showed a very weak correlation between the chloride and deuterium (Fig. 11). This indicated that the groundwaters studied are were not strongly affected by evaporation process in a deep degree.

Compared between the NPCSX and SPCSX regions, the stable isotopic values ( $\delta^{18}\text{O}$  and  $\delta\text{D}^3\text{H}$ ) of groundwaters in the SPCSX region varied greatly with a large amplitude, while those in the NPCSX are were relatively constant (Fig. 10c-d+2). This indicated that the recharge sources of groundwater in the SPCSX are more diverse were diversity than those in the NPCSX. The constant variations indicated that the recharge source of groundwater in the NPCSX is relatively unitary. The isotopic values in the SPCSX are were much lighter than those in the NPCSX along the distance section from south to north (Fig. 10c-d+2). The heaviest values occurred in the sample g11 collected from the NPCSX (Fig. 10c-d+2), indicating a water being earlier firsthand recharged. The spring water sample s2, a representation of discharge water, is was characterized by medium values of  $\delta\text{D}^3\text{H}$  and  $\delta^{18}\text{O}$ . Similarly, the deuterium excess values of these groundwaters also showed such spatial patterns in the two regions

带格式的: 无下划线, 字体颜色: 自动设置

带格式的: 无下划线, 字体颜色: 自动设置, 图案: 15% (自动设置前景, 白色 背景)

带格式的: 图案: 15% (自动设置前景, 白色 背景)

带格式的: 无下划线, 字体颜色: 自动设置, 图案: 15% (自动设置前景, 白色 背景)

带格式的: 图案: 15% (自动设置前景, 白色 背景)

带格式的: 无下划线, 字体颜色: 自动设置

带格式的: 无下划线, 字体颜色: 自动设置, 图案: 15% (自动设置前景, 白色 背景)

带格式的: 无下划线, 字体颜色: 自动设置

带格式的: 无下划线, 字体颜色: 自动设置, 图案: 15% (自动设置前景, 白色 背景)

(Fig. 10e-f13). These results indicated that the groundwaters in the SPCSX area, with relatively enriched isotopic signals in  $\delta^2\text{H}$  and  $\delta^{18}\text{O}$  by comparison with those in the NPCSX area, are composed of a mixture of the groundwaters in the NPCSX with other waters. In consequence, thus resulting in the spring water sample s2 in the discharge zone being characterized by an intermediate isotopic signal (Figs. 12, 13). A similar case was also observed by Abdalla (2009), who reported a that progressive decrease of the isotopic compositions had decreased progressively along a regional scale flow path of groundwater in the semi arid central Sudan, because of the mixture of groundwaters with between the heavier/lighter isotope recharged and the lighter isotope recharged.

In addition to stable isotopes, the tritium contents were broadly and positively related to the values of deuterium excess in the groundwater samples in the PCSX-section (Fig. 10e-g14a). The deuterium excess or d-excess, computed from the equation  $d = \delta^2\text{H} - 8\delta^{18}\text{O}$  (Dansgaard, 1964), is controlled primarily by the mean relative humidity of the air masses formed above the water surface (Merlivat and Jouzel, 1979) and generally reflects the rate of evaporation process experienced during the flowing paths (Dansgaard, 1964). For a water that experiences an evaporation process, the d-excess value will increase in the evaporated water vapor, but will decrease in the residual water body (Dansgaard, 1964; Merlivat and Jouzel, 1979). In this study, except for sample g11 (a sample very close to the riverhead area), the positive relationship between the tritium and the deuterium excess generally shows that the d-excess values are higher in the groundwaters collected from the NPCSX, but are lower in those from the SPCSX (Fig. 10e-g14a). This distribution pattern indicates that the groundwaters in the NPCSX are relatively younger and had experienced a lower degree of evaporation than those in the SPCSX. The d-excess gradient, increasing from the south to north in the PCSX, further suggests that groundwater does not flow from the SPCSX area to the NPCSX area, namely out of the topographical control.

In Fig. 14b, the tritium contents of groundwater increased while the TDS decreased from the south to north in the PCSX (Fig. 14b). This distribution pattern of the two environmental tracers further proved that the groundwaters in the NPCSX are younger and fresher than those in the SPCSX. The reason why the older groundwater has a higher TDS value can be attributed to the fact that most minerals dissolve slowly in an aquifer and the older groundwater stay have more in contacting with the surrounding rocks for a longer time allowing more time to act between water solution and soluble minerals to pass in solution into the water, leading to a higher TDS (Fitts, 2002). Many studies (e.g., Boronina et al., 2005; Kazemi et al., 2006) have demonstrated that groundwater will flow in the direction in which it gets older. In view of this point, groundwaters in the PCSX region should theoretically flow from the NPCSX area to the SPCSX area, in opposition to evidently being paradoxical with the S-N topographical gradient between the Otindag and Dali in the PCSX regions. Thus groundwater in the Dali are not the source of groundwater in the Otindag. The similar isotopic signals between groundwaters in the two regions indicate that these waters might be recharged from a common source in other place.

Overall, it implies that the hydraulic gradient of groundwater derived from their topography is not consistent with the isotopic and hydrogeochemical gradients of groundwater that is observed in the

带格式的: 无下划线, 字体颜色: 自动设置

带格式的: 无下划线, 字体颜色: 自动设置, 图案: 15% (自动设置前景, 白色 背景)

带格式的: 无下划线, 字体颜色: 自动设置, 图案: 15% (自动设置前景, 白色 背景)

带格式的: 无下划线, 字体颜色: 自动设置

带格式的: 无下划线, 字体颜色: 自动设置, 图案: 15% (自动设置前景, 白色 背景)

带格式的: 无下划线, 字体颜色: 自动设置

带格式的: 无下划线, 字体颜色: 自动设置, 图案: 清除

带格式的: 无下划线, 字体颜色: 自动设置

带格式的: 无下划线, 字体颜色: 自动设置, 图案: 15% (自动设置前景, 白色 背景)

eastern Otindag. This further indicates that the origin of groundwater in the Otindag Desert is not geomorphologically or topographically controlled.

#### 4.5. Remote water recharge on groundwater in the Otindag: mountains waters

##### Potential sources of groundwater from recharge in the Otindag: the Daxinganling and Yinshan Mountains: tectonic control

The discussions above revealed indicated that groundwater in the eastern Otindag has a close relationship with river water in the Dali Basin in terms of their isotopic signature perspective, and that both the river water and groundwaters in the Otindag and Dali two regions Basin might be recharged from a common source derived from another place. Considering the third hypothesis abovementioned that "remote/mountains waters emanate under colder and wetter conditions", we propose that this "common source" of the two regions are from mountains areas surrounding the Otindag and Dali Basin. Meanwhile, the isotopic and hydrochemical characteristics of groundwaters both in the NPCSX and SPCSX areas indicated that the groundwaters between the Dali (together with the northeast Otindag) and the southeast Otindag were different and the groundwater systems in the two regions were not integrated.

For the Dali catchment, the Dali Lake and its surrounding rivers are the most important water bodies in the Dali Basin. There are two large permanent rivers and lots of small intermittent streams entering the Dali Basin Lake (Xiao et al., 2008), including the Xilamulun River to the south and the Gongger River to the north, both of which are stemming from the Greater Khingan Mountains (Daxing'anling Mountains in Chinese pinyin term, 1,100-1,400 m above seal level) (Fig. 1). The Xilamulun River, 380 km in length and  $32.54 \times 10^3 \text{ km}^2$  in area, is a neighboring river both to the southeastern Dali and to the northeastern Otindag (Figs. 1 and 2). The Xilamulun River carries a large amount of water (about  $6.58 \times 10^8 \text{ m}^3/\text{y}$ ) from the Daxing'anling Mountains flowing through the east margins of the Dali and Otindag (Wu et al., 2014). This is an important clue linking natural waters between groundwaters in the northeastern Otindag and the river waters and groundwaters in the Dali Basin.

Variation in the elevation from the Dali Lake to the riverhead of the Xilamulun River can be clearly found along a land surface topographical section (Fig. 115). The channel of the Xilamulun River is located in a fault called the Xilamulun River Fault or the Xar Moron River Fault (Fig. 1), which is a part of the Solonker Suture Zone (Eizenhöfer et al., 2014) or the Xilamulun-Changchun-Yanji plate suture zone (Sun et al., 2004) or the Solonker Suture Zone (Eizenhöfer et al., 2014) in the regional tectonical settings (Figs. 2-31 and 2). Outcrop observations indicate that fault zones commonly have a permeability structure suggesting they should act as complex conduit-barrier systems in which along-fault flow is encouraged and across-fault flow is impeded (Bense et al., 2013). Thus the hydraulic gradient of groundwater flow in the Eastern margins of the Otindag and Dali Basin must be controlled by the fault zone hydrogeology. This may be the reason why the hydraulic gradient of groundwater represented by the isotopic and hydrogeochemical gradients of groundwater samples in this study is not consistent with the local topographical gradient in the Otindag Desert. On the other hand, the regional aquifer is generally unconfined in dune fields of the Otindag Desert but

带格式的: 图案: 15% (自动设置前景, 白色 背景)

带格式的: 无下划线, 字体颜色: 自动设置

带格式的: 无下划线, 字体颜色: 自动设置, 图案: 15% (自动设置前景, 白色 背景)

带格式的: 图案: 15% (自动设置前景, 白色 背景)

带格式的: 无下划线, 字体颜色: 自动设置

带格式的: 无下划线, 字体颜色: 自动设置, 图案: 清除

带格式的: 无下划线, 字体颜色: 自动设置

带格式的: 无下划线, 字体颜色: 自动设置, 图案: 15% (自动设置前景, 白色 背景)

带格式的: 无下划线, 字体颜色: 自动设置

带格式的: 无下划线, 字体颜色: 自动设置

带格式的: 无下划线, 字体颜色: 自动设置

带格式的: 无下划线, 字体颜色: 自动设置, 图案: 15% (自动设置前景, 白色 背景)

带格式的: 无下划线, 字体颜色: 自动设置

带格式的: 无下划线, 字体颜色: 自动设置, 不检查拼写或语法, 图案: 清除

带格式的: 无下划线, 字体颜色: 自动设置

带格式的: 无下划线, 字体颜色: 自动设置, 不检查拼写或语法, 图案: 清除

带格式的: 无下划线, 字体颜色: 自动设置

带格式的: 无下划线, 字体颜色: 自动设置, 不检查拼写或语法, 图案: 清除

带格式的: 无下划线, 字体颜色: 自动设置

带格式的: 无下划线, 字体颜色: 自动设置

semi-confined to confined in the Daxing'Anling uplands (Fig. 3), thus the thick unconsolidated aquifers in the study area (Figs. 32 and 115) will be favourable conditions for groundwater storage and transportation along the Solonker Suture Zone. When rivers stem from the Daxing'Anling Mountains and flow downward to the marginal areas of the Dali and Otindag, leakage water from these rivers can recharge the desert land through thick unconsolidated aquifers (Fig. 15). A strong isotopic evidence is that the lake and river waters in the Dali Basin share the same evaporation line (EL2) with the groundwaters in the PCSX area.

Although groundwaters in the SPCSX area are were different from those in the NPCSX area, their isotopic data points still fell onto the EL2 (Fig. 9XX), which further indicates that the groundwaters in the SPCSX are were a mixture of waters from the Daxing'Anling Mountain and other sources. Another

Another source for groundwater recharge in the SPCSX could can be speculated represented by to remote water such as flash floods derived coming from the north Yinshan Mountains (Fig. 1), because it can be clearly observed from digital maps that many transient rivers or streams originated from the Yinshan Mountains flow into the south and southeastern Otindag (Fig. 1). Supportive evidence for this idea can be derived. A key clue for this view can also be obtained from the isotopic signals of local precipitation and groundwater samples collected from the areas near to the Yinshan Mountains in this study. Supportive evidence for this idea can also be observed in the summer rainy season. During rainy days or under storm conditions, occasional heavy, short rainstorms cause floods in soil-rich wadi channels and low-lying depressions in the unconfined to semi-confined areas of the Yinshan Mountains' piedmont. These waters may temporarily recharge shallow aquifers in the SPCSX area.

It has been reported that temperature and altitude can deeply affect the  $\delta D$  and  $\delta^{18}O$  compositions of precipitation. The isotope depleted signals of  $\delta^2H$  and  $\delta^{18}O$  in waters from mountain areas to can be passed into the groundwater in a plain areas (Harrington et al., 2002; Vanderzalm et al., 2011; Liu and Yamanaka, 2012; Rattray, 2015; Khalid and Hamid, 2017). Rattray (2015) attributed this isotopic signature to the altitude effect on precipitation, because temperature and altitude can deeply affect the deuterium and oxygen-18 compositions in precipitation. The values of  $\delta^2H$  and  $\delta^{18}O$  in precipitation from the mountain areas will be depleted when compared with those in precipitation from the piedmont areas (Rattray, 2015). Rattray (2015) attributed this isotopic signature to the altitude effect on precipitation. For the Yinshan Mountain Range, there is lack of the data of stable isotopes data in precipitation are lacking from the mountains in this study. However, based on the altitude effect of temperature on isotopic signals, we can theoretically estimate the values using the precipitation sample (p1), which was collected from the piedmont area of the Yinshan Mountains in this study. For example, (The GPS elevation of the sample location of p1 is about 1260 m a.s.l. and that of the top of the Yinshan mountain range is around 1700-1800 m a.s.l., thus the elevation drop is approximately 500 m between the two sites. Based on this difference in elevation drop and the potential effect of elevation change on temperature (that elevation arises will lead to a decrease of temperature by 0.65°C per 100 m), the temperature difference between the two sites is about 3.25 °C. According to an empirical estimation for precipitation in NW China that the  $\delta^{18}O$ -temperature gradient is 0.37 ‰/°C and the

带格式的: 无下划线, 字体颜色: 自动设置

带格式的: 无下划线, 字体颜色: 自动设置

带格式的: 无下划线, 字体颜色: 自动设置

带格式的: 字体: (默认) + 西文正文, 五号, 无下划线, 字体颜色: 自动设置, 检查拼写和语法

带格式的: 无下划线, 字体颜色: 自动设置

带格式的: 字体: (默认) + 西文正文, 五号, 无下划线, 字体颜色: 自动设置, 检查拼写和语法

带格式的: 无下划线, 字体颜色: 自动设置



~~$\delta^{18}\text{O}$  elevation gradient is 0.13‰/100 m (Liu et al., 2014), the  $\delta^{18}\text{O}$  value in precipitation at the Yinshan Mountains shall be 1.85 ‰ lower than that in the sample p1, namely 8.99‰ in  $\delta^{18}\text{O}$  for the Yinshanmountain precipitation. This value is very similar to that of the groundwater (-9‰) in the SPCSX area. It indicates that the Yinshan Mountains area is area potential source area for the groundwater recharge in the SPCSX area.~~

~~In general, the above analyses revealed that the highland water resources from the Daxing'Anling and Yinshan Mountains were isotopically and geochemically traced to be a major source for the groundwater in the Otindag. It suggests means that the modern indirect recharge mechanism, instead of the direct recharge and the palaeowater recharge, is responsible for groundnwater recharge in this the desert land in northern China. It also This implies that the tectonic settings (such as the Solonker suture zone), but not the climatic and topographical e control, is wassignificant for the groundwater origin in the Otindag.~~

## **56. Conclusions**

~~Water resources in arid lands of the world are generally scarce and highly uncertain. In the middle-latitude desert zone of northern China, however, many deserts such as the Otindag and Badanjinlin Deserts, are unexpectedly rich in incommensurate groundwater resources, such as the Otindag and the Badanjinlin Deserts, although they have no surface runoff and have been under an arid or hyper-arid climate for a long geological period of time. How the groundwaters are originated and recharged in thesea deserts environment are thus becoming a key questions that are longtime ago, but it is still under an endless debate at present in the acadamic circle. For some of the earth scientists, the direct recharge is thought to be very important for groundwaters in the wide desert lands of northern China, due to the lack of surface runoffs. However, the groundwater availability is very much as function of the local- and regional-scale geological and climatic settingseomponents. To achieve an i Integrated understanding of the groundwater recharge and its their controlling mechanisms is of great significance. In this study, an effort to explore the groundwater recharge was explored carried out using multiple environmental tracers in the eastern Otindag Desert of northern China, a region that where is under the influence control of the East Asian Summer Monsoon (EASM) climate. The results showed that (1), the natural waters in the study area arewere fresh water ( $\text{TDS} < 1000 \text{ mg/L}$ ) with and arewere neutral to slightly alkalinepH. The major water types arewere the  $\text{Ca-HCO}_3$  and  $\text{Ca/Mg-SO}_4$  types. There arewere no Cl-type and Na-type waters occurring in the study area, indicating a primary stage of water evolution in terms of the hydrogeochemicalperspectiveterms. (2) Compared to the modern summer precipitation, the groundwaters, river waters and spring waters are were depleted in  $\delta\text{D}^2\text{H}$  and  $\delta^{18}\text{O}$ , while the lake waters arewere enriched in  $\delta^2\text{H}$  and  $\delta^{18}\text{O}$ . All these waters, however, shared a same line of evaporation in the Craig linediagram, indicating a genetic relationship on their recharge sources. The more depleted stable isotopic signals ofin the groundwaters is more depleted than those ofin the modern summer precipitation and this suggestsed that the groundwaters studied here could only be sourced from a colder water different from other than the EASM precipitation. In general, the analyses revealed that the highland remote water resources from the Daxing'Anling and Yinshan Mountains were isotopically and geochemically traced to be a major source for the groundwater in the Otindag.~~

带格式的: 无下划线, 字体颜色: 自动设置

带格式的: 无下划线, 字体颜色: 自动设置

带格式的: 无下划线, 字体颜色: 自动设置

带格式的: 无下划线, 字体颜色: 自动设置, 图案: 15% (自动设置前景, 白色 背景)

带格式的: 无下划线, 字体颜色: 自动设置

带格式的: 无下划线, 字体颜色: 自动设置, 图案: 15% (自动设置前景, 白色 背景)

带格式的: 无下划线, 字体颜色: 自动设置

1076 ~~The contribution from local winter precipitation is was very small due to its weak rainfall effect. The~~  
 1077 ~~high contents (5-25 TU) of tritium in these groundwaters indicated that they are were young and are~~  
 1078 ~~could not be recharged by palaeowaters formed during the past glacial periods. (3) There are eClear~~  
 1079 ~~difference in the isotopic signals occurred between the groundwaters in the north (NPCSX) and south~~  
 1080 ~~(SPCSX) parts of the study area, but the signals of were silimar between the groundwaters in the~~  
 1081 ~~NPCSX are similar to that of and its neighbouring catchment, the Dali Basin. (4) Combined analysis~~  
 1082 ~~was further performed using the isotopic and physiochemical data of natural waters collected from the~~  
 1083 ~~Dali Basin and the surrounding mountains. The resulsts indicated that the major sources of the~~  
 1084 ~~groundwaters in the NPCSX, as well as the river waters and groundwaters in the Dali Basin, are were~~  
 1085 ~~mainly derived from the Daxin'Anling Mountains, by leaking the Xilamulan River water through a~~  
 1086 ~~thick aquifer in the eastern margins of the Otindag. By contrast, While the groundwaters in the SPCSX~~  
 1087 ~~are were mainly recharged from two sources, the flash floods from the Yinshan Mountains and the river~~  
 1088 ~~waters from the Daxin'Anling Mountains. (5) It suggests that (The modern indirect recharge mechanism,~~  
 1089 ~~instead of the direct recharge and the palaeo-water recharge, is was the most significant for~~  
 1090 ~~groundwater recharge in the eastern Otindag. It indicates that the tectonic settings at a regional scale,~~  
 1091 ~~but not the climate and topography, is was at the origin of responsible for the groundwater origin in the~~  
 1092 ~~Otindag. This study provideed a new perspective sight into the origin and evolution of groundwater~~  
 1093 ~~resources in the middle-latitude desert zone of northern China.~~

带格式的: 无下划线, 字体颜色: 自动设置, 图案: 15% (自动设置前景, 白色 背景)

带格式的: 无下划线, 字体颜色: 自动设置

带格式的: 无下划线, 字体颜色: 自动设置, 图案: 15% (自动设置前景, 白色 背景)

带格式的: 无下划线, 字体颜色: 自动设置

## 1096 **Acknowledgements**

1097 This study was financially supported by the National Natural Science Foundation of China  
 1098 (~~41602196~~, 41771014 and 41602196) and the National Key Research and Development Program of  
 1099 China (2016YFA0601900). We thank the China Meteorological Data Sharing Service system for  
 1100 providing the weather data. Sincere thanks are also extended to Profs. Xiaoping Yang, Xunming Wang,  
 1101 Jule Xiao and other workmates, e.g., ~~Qiuhong Li~~, Ziting Liu, Hongwei Li, and DeguoZhang for their  
 1102 generous help in the research work.

带格式的: 无下划线, 字体颜色: 自动设置

带格式的: 无下划线, 字体颜色: 自动设置

## 1104 **References:**

- 1105 ~~Abdalla, O.A.: Groundwater recharge/discharge in semi-arid regions interpreted from isotope and~~  
 1106 ~~chloride concentrations in north White Nile Rift, Sudan, Hydrogeology Journal, 17, 679-692, 2009.~~  
 1107 ~~Al-Bassam, A.M., Awad, H.S., and Al-Alawi, J.A.: DurovPlot: a computer program for processing and~~  
 1108 ~~plotting hydrochemical data. Ground Water, 35, 362-367, 1997.~~  
 1109 ~~Al-Bassam, A.M., and Khalil, A.R.: DurovPwin: a new version to plot the expanded Durov diagram for~~  
 1110 ~~hydro-chemical data analysis. Computers & Geosciences, 42, 1-6, 2012.~~  
 1111 ~~Baeza, A., Garcia, E., and Miro, C.: A procedure for the determination of very low activity levels of~~  
 1112 ~~tritium in water samples. Journal of Radioanalytical and Nuclear Chemistry, 241, 93-100,~~  
 1113 ~~1999. Bazuhaier, A.S., and Wood, W.W.: Chloride mass-balance method for estimating ground~~  
 1114 ~~water recharge in arid areas: examples from western Saudi Arabia. Journal of Hydorlogy, 186,~~  
 1115 ~~153-159, 1996.~~

带格式的: 无下划线, 字体颜色: 自动设置

|      |                                                                                                                                   |                                |
|------|-----------------------------------------------------------------------------------------------------------------------------------|--------------------------------|
| 1116 | <u>Bense, V.F., Gleeson, T., Loveless, S.E., Bour, O., and Scibek, J.: Fault zone hydrogeology.</u>                               | 带格式的: 无下划线, 字体颜色: 自动设置         |
| 1117 | <u>Earth-Science Reviews, 127, 171-192, 2013.</u>                                                                                 |                                |
| 1118 | <u>Bethke, C.M., and Johnson, T.M.: Groundwater Age and Groundwater Age Dating. Annual Review of</u>                              | 带格式的: 无下划线, 字体颜色: 自动设置         |
| 1119 | <u>Earth and Planetary Sciences, 36, 121-152, 2008.</u>                                                                           |                                |
| 1120 | <u>Blasch, K.W., and Bryson, J.R.: Distinguishing sources of ground water recharge by using <math>\delta^2\text{H}</math> and</u> | 带格式的: 无下划线, 字体颜色: 自动设置         |
| 1121 | <u><math>\delta^{18}\text{O}</math>. Ground Water, 45, 294-308, 2007.</u>                                                         |                                |
| 1122 | <u>Boronina, A., Renard, P., Balderer, W., and Stichler, W.: Application of tritium in precipitation and in</u>                   | 带格式的: 无下划线, 字体颜色: 自动设置         |
| 1123 | <u>groundwater of the Kouris catchment (Cyprus) for description of the regional groundwater flow.</u>                             |                                |
| 1124 | <u>Applied Geochemistry, 20, 1292-1308, 2005.</u>                                                                                 |                                |
| 1125 | <u>Chadha, D.K.: A proposed new diagram for geochemical classification of natural waters and</u>                                  | 带格式的: 无下划线, 字体颜色: 自动设置         |
| 1126 | <u>interpretation of chemical data. Hydrogeology Journal, 7, 431-439, 1999.</u>                                                   |                                |
| 1127 | <u>Chebotarev, I.I.: Metamorphism of natural waters in the crust of weathering. Geochimica et Cosmochimica Acta,</u>              | 带格式的: 无下划线, 字体颜色: 自动设置, 图案: 清除 |
| 1128 | <u>8,22-32, 1955.</u>                                                                                                             |                                |
| 1129 | <u>Chen, F., Chen, J., Holmes, J., Boomer, I., Austin, P., Gates, J.B., Wang, N., Brooks, S.J., and Zhang, J.:</u>                | 带格式的: 无下划线, 字体颜色: 自动设置         |
| 1130 | <u>Moisture changes over the last millennium in arid central Asia: a review, synthesis and</u>                                    |                                |
| 1131 | <u>comparison with monsoon region. Quaternary Science Reviews, 29, 1055-1068, 2010.</u>                                           |                                |
| 1132 | <u>Chen, J., Chen, X., and Wang, T.: Isotopes tracer research of wet sand layer water sources in Alxa</u>                         | 带格式的: 无下划线, 字体颜色: 自动设置         |
| 1133 | <u>Desert. Advances in Water Science, 25, 196-206, 2014 (in Chinese).</u>                                                         |                                |
| 1134 | <u>Chen, J., Li, L., Wang, J., Barry, D.A., Sheng, X., Gu, W., Zhao, X., and Chen, L.: Water resources:</u>                       | 带格式的: 无下划线, 字体颜色: 自动设置         |
| 1135 | <u>groundwater maintains dune landscape. Nature, 432, 459-460, 2004.</u>                                                          |                                |
| 1136 | <u>Chen, J., Liu, X., Wang, C., Rao, W., Tan, H., Dong, H., Sun, X., Wang, Y., and Su, Z.: Isotopic</u>                           | 带格式的: 无下划线, 字体颜色: 自动设置         |
| 1137 | <u>constraints on the origin of groundwater in the Ordos Basin of northern China. Environmental</u>                               |                                |
| 1138 | <u>Earth Sciences, 66, 505-517, 2012a.</u>                                                                                        |                                |
| 1139 | <u>Chen, J., Sun, X., Gu, W., Tan, H., Rao, W., Dong, H., Liu, X., and Su, Z.: Isotopic and hydrochemical</u>                     | 带格式的: 无下划线, 字体颜色: 自动设置         |
| 1140 | <u>data to restrict the origin of the groundwater in the Badain Jaran Desert, Northern China.</u>                                 |                                |
| 1141 | <u>Geochemistry International 50, 455-465, 2012b.</u>                                                                             |                                |
| 1142 | <u>Chen, J., Yang, Q., and Hao, G.: Using hydrochemical and environmental isotopical data to analyse</u>                          | 带格式的: 无下划线, 字体颜色: 自动设置         |
| 1143 | <u>groundwater recharge in the Hunshandake Sandy Land. Inner Mongolia Science Technology &amp;</u>                                |                                |
| 1144 | <u>Economy, 17, 9-12, 2008 (in Chinese).</u>                                                                                      |                                |
| 1145 | <u>Clark, I.D.: Groundwater Geochemistry and Isotopes. CRC Press, Boca Raton, 2015.</u>                                           | 带格式的: 无下划线, 字体颜色: 自动设置         |
| 1146 | <u>Coplen, T.: Uses of Environmental Isotopes, in: Alley, W.M. (Ed.), Regional Ground Water Quality.</u>                          | 带格式的: 无下划线, 字体颜色: 自动设置         |
| 1147 | <u>Van Nostrand Reinhold, New York, 1993.</u>                                                                                     |                                |
| 1148 | <u>Craig, H.: Isotopic Variations in Meteoric Waters. Science, 133, 1702-1703, 1961.</u>                                          | 带格式的: 无下划线, 字体颜色: 自动设置         |
| 1149 | <u>Dansgaard, W.: Stable isotopes in precipitation. Tellus, 16, 436-468, 1964.</u>                                                |                                |
| 1150 | <u>Dogramaci, S., Skrzypek, G., Dodson, W., and Grierson, P.F.: Stable isotope and hydrochemical</u>                              | 带格式的: 无下划线, 字体颜色: 自动设置         |
| 1151 | <u>evolution of groundwater in the semi-arid Hamersley Basin of subtropical northwest Australia.</u>                              | 带格式的: 无下划线, 字体颜色: 自动设置         |
| 1152 | <u>Journal of hydrology, 475, 281-293, 2012.</u>                                                                                  |                                |
| 1153 | <u>Doll, P., and Fiedler, K.: Global-scale modeling of groundwater recharge. Hydrology and Earth System</u>                       | 带格式的: 无下划线, 字体颜色: 自动设置         |
| 1154 | <u>Sciences, 12, 863-885, 2008.</u>                                                                                               |                                |
| 1155 | <u>Doll, P.: Vulnerability to the impact of climate change on renewable groundwater resources: a</u>                              | 带格式的: 无下划线, 字体颜色: 自动设置         |



- global-scale assessment. *Environmental Research Letters*, 4, 035006, doi:10.1088/1748-9326/4/3/035006, 2009.
- ▲Drever, J.I.: Catchment mass balance. In: Saether, O.M., and de Caritat, P. (Eds.), *Geochemical Processes, Weathering and Groundwater Recharge in Catchments*. A.A. Balkema, Rotterdam, pp. 241-261, 1997.
- ▲Durov, S.A.: Natural waters and graphic representation of their composition. *Doklady Akademii Nauk SSSR*, 59, 87-90, 1948.
- ▲Edmunds, W.M., Ma, J., Aeschbach-Hertig, W., Kipfer, R., and Darbyshire, D.P.F.: Groundwater recharge history and hydrogeochemical evolution in the Minqin Basin, North West China. *Applied Geochemistry*, 21, 2148-2170, 2006.
- ▲Eissa, M.A., Thomas, J.M., Hershey, R.L., Dawoud, M.I., Pohl, G., Dahab, K.A., Gomaa, M.A., and Shabana, A.R.: Geochemical and isotopic evolution of groundwater in the Wadi Watir watershed, Sinai Peninsula, Egypt. *Environmental Earth Sciences*, 71, 1855-1869, 2014.
- ▲Eizenhöfer, P.R., Zhao, G., Zhang, J., and Sun, M.: Final closure of the Paleo-Asian Ocean along the Solonker Suture Zone: Constraints from geochronological and geochemical data of Permian volcanic and sedimentary rocks. *Tectonics*, 33, 441-463, 2014.
- ▲Favreau, G., Cappelaere, B., Massuel, S., Leblanc, M., Boucher, M., Boulain, N., and Ledue, C.: Land clearing, climate variability, and water resources increase in semiarid southwest Niger: a review. *Water Resources Research*, 45, W00A16, doi.org/10.1029/2007WR006785, 2009.
- ▲Fitts, C.R.: *Groundwater science*. Academic Press, Amsterdam, 2002. Freeze, R.A., and Cherry, J.A.: *Groundwater*. Prentice-Hall, Inc. New Jersey, 1979.
- ▲Gat, J.R.: Precipitation, groundwater and surface waters: control of climate parameters on their isotopic composition and their utilization as palaeoclimatological tools. In: *Palaeoclimates and palaeowaters: a collection of environmental isotope studies*. Proc. Adv. Gp. Meeting, Vienna, 25-28 Nov 1980, pp 3-12, IAEA, Vienna, 1983.
- ▲Gat, J.R., and Issar, A.: Desert isotope hydrology: water sources of the Sinai Desert. *Geochimica et Cosmochimica Acta*, 38, 1117-1131, 1974.
- ▲Gates, J., Edmunds, W.M., Ma, J., and Scanlon, B.: Estimating groundwater recharge in a cold desert environment in northern China using chloride. *Hydrogeology Journal*, 16, 893-910, 2008.
- ▲Giordano, M.: Global groundwater? Issues and solutions. *Annual Review of Environment and Resources*, 34, 153-178, 2009.
- ▲Gran, G.: Determination of the equivalence point in potentiometric titrations. Part II. *Analyst*, 77, 661-671, 1952.
- ▲Guendouz, A., Moulla, A.S., Edmunds, W.M., Zouari, K., Shand, P., and Mamou, A.: Hydrogeochemical and isotopic evolution of water in the Complexe Terminal aquifer in the Algerian Sahara. *Hydrogeology Journal*, 11, 483-495, 2003.
- ▲Harrington, G.A., Cook, P.G., and Herczeg, A.L.: Spatial and temporal variability of ground water recharge in central Australia: a tracer approach. *Ground Water*, 40, 518-527, 2002.
- ▲Healy, R.W.: *Estimating groundwater recharge*. Cambridge University Press, New York, 2010.
- ▲Herczeg, A.L., and Leaney, F.: Review: environmental tracers in arid-zone hydrology. *Hydrogeology*

带格式的: 无下划线, 字体颜色: 自动设置

Journal, 19, 17-29, 2011.

Jahn, B.M.: The Central Asian Orogenic Belt and growth of the continental crust in the Phanerozoic. Geological Society London Special Publications, 226, 73-100, 2004.

Jian, P., Liu, D., Kroner, A., Windley, B.F., Shi, Y., Zhang, W., Zhang, F., Miao, L., Zhang, L., and Tomurhuu, D.: Evolution of a Permian intraoceanic arc-trench system in the Solonker suture zone, Central Asian Orogenic Belt, China and Mongolia. Lithos, 118, 169-190, 2010.

Jin, K., Rao, W., Tan, H., Song, Y., Yong, B., Zheng, Y., Chen, T., and Han, L.: H-O isotopic and chemical characteristics of a precipitation-lake water-groundwater system in a desert area. Journal of Hydrology, 559, 848-860, 2018.

Jobbágy, E., Noretto, M., Villagra, P., and Jackson, R.: Water subsidies from mountains to deserts: their role in sustaining groundwater-fed oases in a sandy landscape. Ecological Applications, 21, 678-694, 2011.

Kaufman, S.L.W.F.: The natural distribution of tritium. Physical Review, 93, 1337-1344, 1954.

Kazemi, G.A., Lehr, J.H., and Perrochet, P.: Groundwater age. John Wiley & Sons, Hoboken, 2006.

Khalid, B., and Hamid, C.: Using major ion and stable isotopes to characterize groundwater Recharge and hydrochemical processes in a mountain plain area: a case study in High Atlas of Marrakech, Morocco. Journal of Environment and Earth Science, 7, 100-114, 2017.

Lawrence, A.R., Lloyd, J.W., and Marsh, J.M.: Hydrochemistry and Groundns, Hoboken.g in Part of the Lincolnshire Limestone Aquifer, England. Ground Water, 14, 320-327, 1976. Li, J.: Permian geodynamic settings of Notheast China and adjacent regions: closure of the Paleo-Asian Ocean and subduction of the Paleo-Pacific Plate. Journal of Asian Earth Sciences, 26, 207-224.

Li, S., Sun, W., Li, X., and Zhang, B.: Sedimentary characteristics and environmental evolution of Otindag sandy land in Holocene. Journal of Desert Research, 15, 323-331, 1995 (in Chinese).

Liu, J., Song, X., Yuan, G., and Sun, X.: Stable isotopic compositions of precipitation in China. Tellus B, 66, 1-17, 2014.

Liu, Y., and Yamanaka, T.: Tracing groundwater recharge sources in a mountain plain transitional area using stable isotopes and hydrochemistry. Journal of Hydrology, 464-465, 116-126, 2012.

Liu, Z., and Yang, X.: Geochemical-geomorphological Evidence for the provenance of aeolian sands and sedimentary environments in the Hunshandake Sandy Land, Eastern Inner Mongolia, China. Acta Geologica Sinica (English Edition), 87, 871-884, 2013.

Lloyd, J.W., and Heathcote, J.A.: Natural inorganic hydrochemistry in relation to groundwater: An introduction. Clarendon Press, Oxford, 1985.

Love, A.J., Herczeg, A.L., Leaney, F.W., Stadter, M.H., Dighton, J.C., and Armstrong, D.: Groundwater residence time and palaeohydrology in the Otway Basin, South Australia. Journal of Hydrology, 153, 157-187, 1994.

Love, A.J., Herczeg, A.L., Sampson, L., Cresswell, R.G., and Fifield, L.K.: Sources of chloride and implications for  $^{36}\text{Cl}$  dating of old groundwater, south-western Great Artesian basin, Australia. Water Resources Research, 36(6), 1561-1574, 2000.

Ma, J., Ding, Z., Gates, J.B., and Su, Y.: Chloride and the environmental isotopes as the indicators of

带格式的: 无下划线, 字体颜色: 自动设置

带格式的: 无下划线, 字体颜色: 自动设置

带格式的: 无下划线, 字体颜色: 自动设置

带格式的: 缩进: 左侧: 0 厘米, 首行缩进: 0 字符

带格式的: 无下划线, 字体颜色: 自动设置

the groundwater recharge in the Gobi Desert, northwest China. *Environmental Geology*, 55, 1407-1419, 2008.

Ma, J., and Edmunds, W.M.: Groundwater and lake evolution in the BadainJaran Desert ecosystem, Inner Mongolia. *Hydrogeology Journal*, 14, 1231-1243, 2006.

Ma, J., He, J., Qi, S., Zhu, G., Zhao, W., Edmunds, W. M., and Zhao, Y.: Groundwater recharge and evolution in the Dunhuang Basin, northwestern China. *Applied Geochemistry*, 28, 19-31, 2013.

Ma, J., Pan, F., Chen, L., Edmunds, W.M., Ding, Z., He, J., Zhou, K., and Huang, T.: Isotopic and geochemical evidence of recharge sources and water quality in the Quaternary aquifer beneath Jinchang city, NW China. *Applied Geochemistry*, 25, 996-1007, 2010.

Merlivat, L., and Jouzel, J.: Global climatic interpretation of the deuterium-oxygen 18 relationship for precipitation. *Journal of Geophysical Research*, 84, 5029-5033, 1979.

Meybeck, M.: Global occurrence of major elements in rivers. In: Drever, J.I. (Ed.), *Surface and Ground Water, Weathering, and Soils*. Holland, H.D., and Turekian, K.K. (Exec.Eds), *Treatise on Geochemistry*, vol. 5. Elsevier-Pergamon, Oxford, pp. 207-223, 2004.

Nakaya, S., Uesugi, K., Motodate, Y., Ohmiya, I., Komiya, H., Masuda, H., and Kusakabe, M.: Spatial separation of groundwater flow paths from a multi-flow system by a simple mixing model using stable isotopes of oxygen and hydrogen as natural tracers. *Water Resources Research*, 43, 1-15, 2007.

Petrides, B., Cartwright, I., and Weaver, T.R.: The evolution of groundwater in the Tyrrell catchment, south-central Murray Basin, Victoria, Australia. *Hydrogeology Journal*, 14, 1522-1543, 2006.

Piper, A.M.: A graphic procedure in the geochemical interpretation of water analyses. *Transactions American Geophysical Union*, 25, 914-928, 1944.

Rattray, G.: Geochemical evolution of groundwater in the Mud Lake area, Eastern Idaho, USA. *Environmental Earth Sciences*, 73, 8251-8269, 2015.

Rizk, Z.S., and El-Etr, H.A.: Hydrogeology and hydrogeochemistry of some springs in the United Arab Emirates. *Arabian Journal for Science and Engineering*, 22, 95-111, 1997.

Scanlon, B.R., Keese, K.E., Flint, A.L., Flint, L.E., Gaye, C.B., Edmunds, W.M., and Simmers, I.: Global synthesis of groundwater recharge in semiarid and arid regions. *Hydrological Processes*, 20, 3335-3370, 2006.

Schoeller, H.: *Géochimie des eaux souterraines: application aux eaux des gisements de pétrole*. Société des éditions Technip, Paris, 1955.

Seiler, K.P., and Gat, J.R.: *Groundwater Recharge From Run-Off, Infiltration and Percolation*. Springer, The Netherlands, 2007.

Sklash, M.G., and Mwangi, M.P.: An isotopic study of groundwater supplies in the Eastern Province of Kenya. *Journal of Hydrology*, 128, 257-275, 1991.

Stolp, B.J., Solomon, D.K., Suckow, A., Vitvar, T., Rank, D., Aggarwal, P.K., and Han, L.F.: Age dating base flow at springs and gaining streams using helium - 3 and tritium: Fische - Dagnitz system, southern Vienna Basin, Austria. *Water Resources Research*, 46, W07503, doi:10.1029/2009WR008006, 2010.

Sultan, M., Sturchio, N., Gheith, H., Hady, Y.A., and Anbeawy, M.: Chemical and Isotopic Constraints

带格式的: 无下划线, 字体颜色: 自动设置

带格式的: 无下划线, 字体颜色: 自动设置, 图案: 清除

带格式的: 无下划线, 字体颜色: 自动设置

带格式的: 无下划线, 字体颜色: 自动设置, 图案: 清除

带格式的: 无下划线, 字体颜色: 自动设置

on the Origin of Wadi EliTarfa Ground Water, Eastern Desert, Egypt. *Ground Water*, 38, 743-751, 2000.

▲Sun, D., Wu, F., Zhang, Y., and Gao, S.: The final closing time of the west Lamulun River-Changchun-Yanji plate suture zone-Evidence from the Dayushan granitic pluton, Jilin Province. *Journal of Jilin University (Earth Science Edition)*, 34, 174-181, 2004 (in Chinese).

▲Sun, J., Ye, J., Wu, W., Ni, X., Bi, S., Zhang, Z., Liu, W., and Meng, J.: Late Oligocene-Miocene mid-latitude aridification and wind patterns in the Asian interior. *Geology*, 38, 515-518, 2010.

▲Taylor, R.G., and Howard, K.W.: Groundwater recharge in the Victoria Nile basin of east Africa: support for the soil moisture balance approach using stable isotope tracers and flow modelling. *Journal of Hydrology*, 180, 31-53, 1996.

Tian, F., Wang, Y., Liu, J., Tang, W., and Jiang, N.: Late Holocene climate change inferred from a lacustrine sedimentary sequence in southern Inner Mongolia, China. *Quaternary International*, 452, 22-32, 2017.

▲Vanderzalm, J.L., Jeuken, B.M., Wischusen, J.D.H., Pavelie, P., Salle, C.L.G.L., Knapp, A., and Dillon, P.J.: Recharge sources and hydrogeochemical evolution of groundwater in alluvial basins in arid central Australia. *Journal of Hydrology*, 397, 71-82, 2011.

▲Wada, Y., van Beek, L.P.H.V., van Kempen, C.M., Reehman, J.W.T.M., Vasak, S., and Bierkens, M.F.P.: Global depletion of groundwater resources. *Geophysical Research Letters*, 37, L20402, doi.org/10.1029/2010GL044571, 2010.

Wang, P., Yu, J., Zhang, Y., and Liu, C.: Groundwater recharge and hydrogeochemical evolution in the Ejina Basin, northwest China. *Journal of Hydrology*, 476, 72-86, 2013.

▲Wang, Q., and Liu, X.Y.: Paleoplate tectonics between Cathaysia and Angaraland in Inner Mongolia of China. *Tectonics*, 5, 1073-1088, 1986.

▲Wang, W., and Feng, Z.D.: 2013- Holocene moisture evolution across the Mongolian Plateau and its surrounding areas: a synthesis of climatic records. *Earth-Science Reviews* 122, 38-57, 2013.

▲Wu, J., An, N., Ji, Y., and Wei, X.: Analysis on Characteristics of Precipitation and Runoff in Silas MuLun River Basin. *Meteorology Journal of Inner Mongolia*, 23-25, 2014 (in Chinese).

▲Xiao, J., Si, B., Zhai, D., Itoh, S., and Lomtadze, Z.: Hydrology of Dali Lake in central-eastern Inner Mongolia and Holocene East Asian monsoon variability. *Journal of Paleolimnology*, 40, 519-528, 2008.

▲Yang, X., Li, H., and Conacher, A.: Large-scale controls on the development of sand seas in northern China. *Quaternary International*, 250, 74-83, 2012.

▲Yang, X., Ma, N., Dong, J., Zhu, B., Xu, B., Ma, Z., and Liu, J.: Recharge to the inter-dune lakes and Holocene climatic changes in the Badainjaran Desert, western China. *Quaternary Research*, 73, 10-19, 2010.

▲Yang, X., Scuderi, L.A., Wang, X., Scuderi, L.J., Zhang, D., Li, H., Forman, S., Xu, Q., Wang, R., Huang, W., and Yang, S.: Groundwater sapping as the cause of irreversible desertification of Hunshandake Sandy Lands, Inner Mongolia, northern China. *PNAS*, 112, 702-706, 2015.

▲Yang, X., Wang, X., Liu, Z., Li, H., Ren, X., Zhang, D., Ma, Z., Rioual, P., Jin, X., and Scuderi, L.: Initiation and variation of the dune fields in semi-arid China – with a special reference to the

带格式的: 无下划线, 字体颜色: 自动设置

带格式的: 字体: (默认) Times New Roman, 10 磅, 无下划线, 字体颜色: 自动设置

带格式的: 缩进: 左侧: 0 厘米, 悬挂缩进: 2 字符, 行距: 1.5 倍行距

带格式的: 无下划线, 字体颜色: 自动设置

带格式的: 字体: (默认) Times New Roman, 10 磅, 无下划线, 字体颜色: 自动设置

带格式的: 无下划线, 字体颜色: 自动设置

带格式的: 字体: (默认) Times New Roman, 10 磅, 无下划线, 字体颜色: 自动设置

带格式的: 无下划线, 字体颜色: 自动设置

带格式的: 字体: (默认) Times New Roman, 10 磅, 无下划线, 字体颜色: 自动设置

带格式的: 字体: (默认) Times New Roman, 10 磅

带格式的: 无下划线, 字体颜色: 自动设置

- 1316 Hunshandake Sandy Land, Inner Mongolia. Quaternary Science Reviews, 78, 369-380, 2013.
- 1317 ~~Yang, X., and Williams, M.A.J.: The ion chemistry of lakes and late Holocene desiccation in the~~  
1318 ~~BadainJaran Desert, Inner Mongolia, China. Catena, 51, 45-60, 2003.~~
- 1319 ~~Yang, X., Zhu, B., Wang, X., Li, C., Zhou, Z., Chen, J., Yin, J., and Lu, Y.: Late Quaternary~~  
1320 ~~environmental changes and organic carbon density in the Hunshandake Sandy Land, eastern Inner~~  
1321 ~~Mongolia, China. Global and Planetary Change, 61, 70-78, 2008.~~
- 1322 ~~Yao, S., Zhu, Z., Zhang, S., Zhang, S., and Li, Y.: Using SWAT model to simulate the discharge of the~~  
1323 ~~river Shandianhe in Inner Mongolia. Journal of Arid Land Resources and Environment, 27,~~  
1324 ~~175-180, 2013 (in Chinese).~~
- 1325 ~~Zhai, Y., Wang, J., Teng, Y., and Zuo, R.: Hydrogeochemical and isotopic evidence of groundwater~~  
1326 ~~evolution and recharge in aquifers in Beijing Plain, China. Environmental Earth Sciences, 69,~~  
1327 ~~2167-2177, 2013. Zhang, Z., Li, K., Li, J., Tang, W., Chen, Y., and Luo, Z.: Geochronology and~~  
1328 ~~geochemistry of the Eastern Erenhot ophiolitic complex: implications for the tectonic evolution of~~  
1329 ~~the Inner Mongolia-Daxinganling Orogenic Belt. Journal of Asian Earth Sciences, 97, 279-293,~~  
1330 ~~2015.~~
- 1331 ~~Zhao, J., Ma, Y., Luo, X., Yue, D., Shao, T., and Dong, Z.: The discovery of surface runoff in the~~  
1332 ~~megadunes of BadainJaran Desert, China, and its significance. Science China Earth Sciences, 60,~~  
1333 ~~707-719, 2017.~~
- 1334 ~~Zhao, L., Xiao, H., Dong, Z., Xiao, S., Zhou, M., Cheng, G., Yin, L., and Yin, Z.: Origins of~~  
1335 ~~groundwater inferred from isotopic patterns of the BadainJaran Desert, Northwestern China.~~  
1336 ~~Ground Water, 50, 715-725, 2012.~~
- 1337 ~~Zhen, Z., Li, C., Li, W., Hu, Q., Liu, X., Liu, Z., and Yu, R.: Characteristics of environmental isotopes~~  
1338 ~~of surface water and groundwater and their recharge relationships in Lake Dali basin. Journal of~~  
1339 ~~Lake Sciences, 26, 916-922, 2014 (in Chinese).~~
- 1340 ~~Zhu, B.Q., Yang, X.P., Rioual, P., Qin, X.G., Liu, Z.T., Xiong, H.G., and Yu, J.J.: Hydrogeochemistry~~  
1341 ~~of three watersheds (the Erlqis, Zhungarar and Yili) in northern Xinjiang, NW China. Applied~~  
1342 ~~Geochemistry, 26, 1535-1548, 2011.~~
- 1343 ~~Zhu, B.Q., Yu, J.J., Qin, X.G., Rioual, P., and Xiong, H.G.: Climatic and geological factors contributing~~  
1344 ~~to the natural water chemistry in an arid environment from watersheds in northern Xinjiang, China.~~  
1345 ~~Geomorphology, 153-154, 102-114, 2012.~~
- 1346 ~~Zhu, B.Q., Yu, J.J., Rioual, P., Gao, Y., Zhang, Y.C., and Xiong, H.G.: Climate effects on recharge and~~  
1347 ~~evolution of natural water resources in middle-latitude watersheds under arid climate. In:~~  
1348 ~~Ramkumar, M. U., Kumaraswamy, K., and Mohanraj, R. (Eds.), Environmental Management of~~  
1349 ~~River Basin Ecosystems. Springer Earth System Sciences, Springer-Verlag, Heidelberg, pp.~~  
1350 ~~91-109, 2015.~~
- 1351 ~~Zhu, B.Q., and Wang, Y.L.: Statistical study to identify the key factors governing ground water~~  
1352 ~~recharge in the watersheds of the arid Central Asia. Environmental Monitoring and Assessment,~~  
1353 ~~188(1), 66, doi: 10.1007/s10661-015-5075-4, 2016.~~
- 1354 ~~Zhu, B.Q., Wang, X.M., and Rioual, P.: Multivariate indications between environment and ground~~  
1355 ~~water recharge in a sedimentary drainage basin in northwestern China. Journal of Hydrology, 2017,~~

带格式的: 无下划线, 字体颜色: 自动设置

1356 549, 92-113, 2017.

1357 Zhu, G.F., Li, Z.Z., Su, Y.H., Ma, J.Z., and Zhang, Y.Y.: Hydrogeochemical and isotope evidence of

1358 groundwater evolution and recharge in Minqin Basin, Northwest China. Journal of Hydrology,

1359 333, 239-251, 2007.

1360 Zhu, G.F., Su, Y.H., and Feng, Q.: The hydrochemical characteristics and evolution of groundwater and

1361 surface water in the Heihe River Basin, northwest China. Hydrogeology Journal, 16, 167-182,

1362 2008.

1363 Zhu, Z., Wu, Z., Liu, S., and Di, X.: An Outline of Chinese Deserts. Science Press, Beijing, 1980 (in

1364 Chinese).

1365

1366

带格式的: 无下划线, 字体颜色: 自动设置

带格式的: 无下划线, 字体颜色: 自动设置

带格式的: 无下划线, 字体颜色: 自动设置

带格式的: 无下划线, 字体颜色: 自动设置

带格式的: 定义网格后不调整右缩进, 行距: 1.5 倍行距, 不对齐到网格



带格式的: 字体颜色: 自动设置

# Figure Captions:

**Fig. 1.** The Geographical location of the Otindag Desert in northern China. (a) The study area shown at a large scale in a bigger scale, and (b) the study area shown at a smaller scale, with detailed information about the boundary and tectonic settings of the desert land. 1, the palaeo lake area of the megalake Dali; 2, the boundary of the Otindag; 3, the modern lake area; 4, the boundary of Fig. 2; 5, the boundary between the westerlies and the East Asian Summer Monsoon (EASM) climate systems. ①, the Xilamulun River. ②, the Gonggeer River. ③, the Shepi River. ④, the Tuligen River. The boundary between the westerlies and the EASMin (a) and (b) is modified from Chen et al. (2010). The palaeo lake area of the megalake Dali and the palaeo channel in (b) is modified from Yang et al. (2015). The location of the Xar Moron Fault is referenced from Eizenhöfer et al. (2014). Section S1 is an elevation section starting from the upstream of the Dali Lake and ending with at a spring sample (s2) in the riverhead of Xilamulun River.

带格式的: 无下划线, 字体颜色: 自动设置

带格式的: 左侧: 3.17 厘米, 右侧: 3.17 厘米, 顶端: 2.54 厘米, 底端: 2.54 厘米, 宽度: 21 厘米, 高度: 29.7 厘米

带格式的: 无下划线, 字体颜色: 自动设置

带格式的: 字体: (默认) Times New Roman, 10 磅, 无下划线, 字体颜色: 自动设置

带格式的: 居中

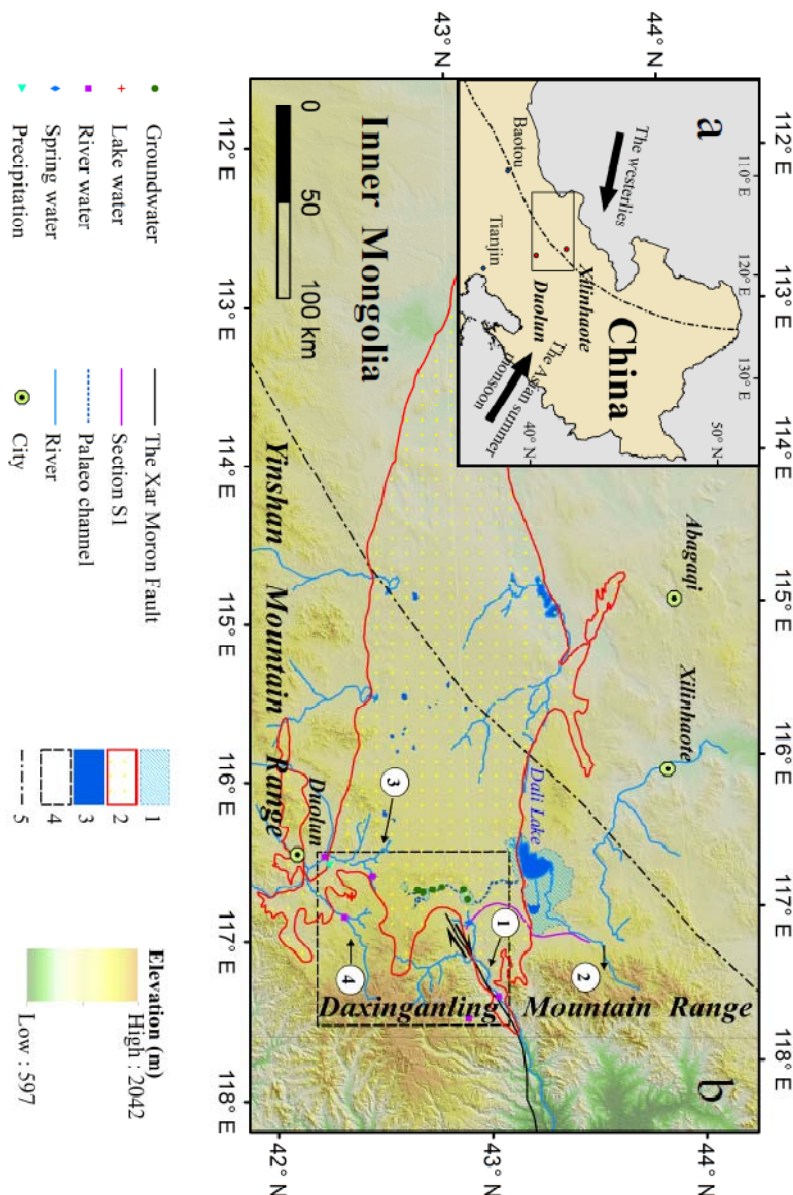

**Fig. 2.** (a) Tectonic framework of the north China-Mongolian segment of the Central Asian Orogenic Belt (modified after Jahn, 2004). (b) Geological sketch map of the northern China-Mongolia tract (modified after Jian et al., 2010). The Solonker suture zone represents the tectonic boundary between the northern (Hutag Uul Block-Northern orogen) and the southern (southern orogen-Northern margin of North China craton) continental blocks. Note that the red line marks the early Permian paleobiogeographical boundary (Wang and Liu, 1986; Li, 2006), which coincides with the northern boundary of the suture zone.

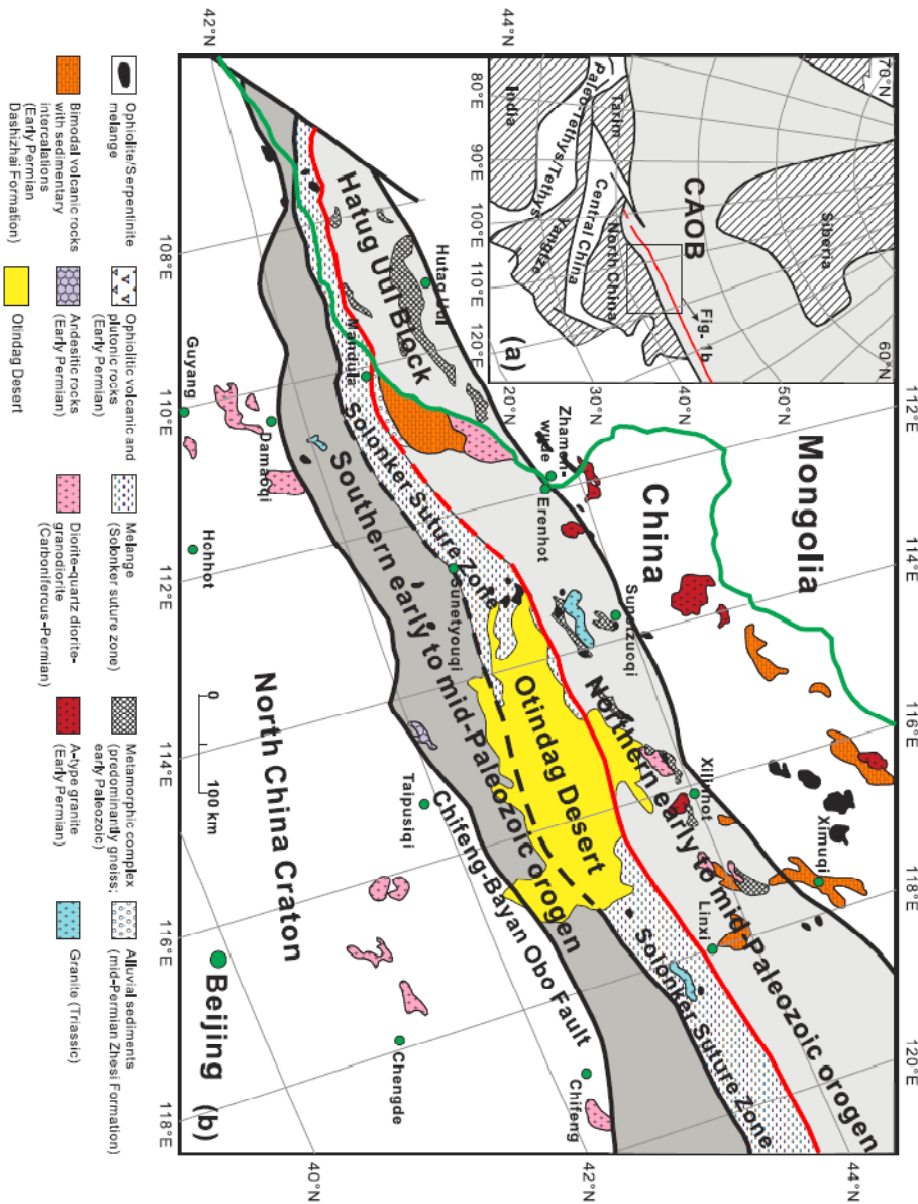

带格式的: 字体: 加粗, 无下划线, 字体颜色: 自动设置

带格式的: 无下划线, 字体颜色: 自动设置

带格式的: 字体: (默认) Times New Roman, 10 磅, 无下划线, 字体颜色: 自动设置

带格式的: 居中



Fig. 3. The hydrogeological division map of the Otindag Desert.

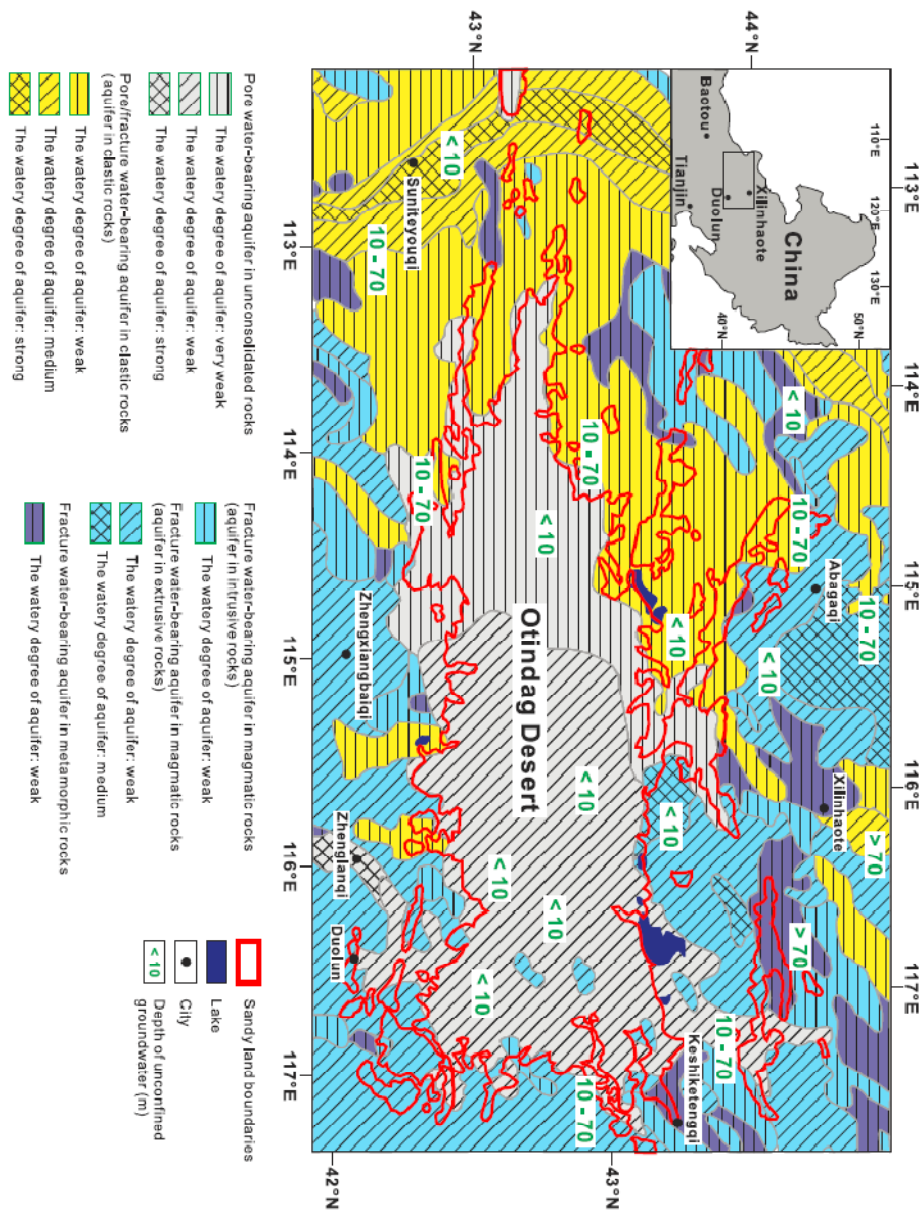

带格式的: 字体: 加粗, 无下划线, 字体颜色: 自动设置

带格式的: 无下划线, 字体颜色: 自动设置

带格式的: 字体: (默认) Times New Roman, 10 磅, 无下划线, 字体颜色: 自动设置

带格式的: 居中

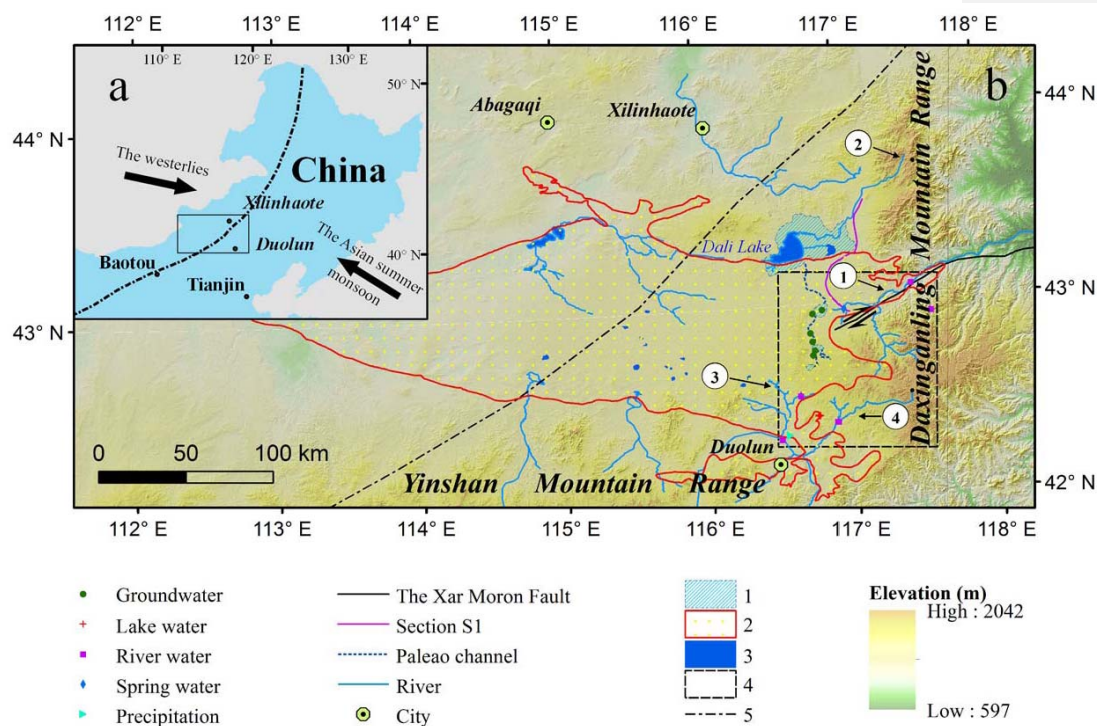

**Fig. 42.** The locations of the water sampling sites in this study.

带格式的: 无下划线, 字体颜色: 自动设置

带格式的: 字体: (默认) Times  
New Roman, 10 磅, 无下划线, 字  
体颜色: 自动设置

带格式的: 居中

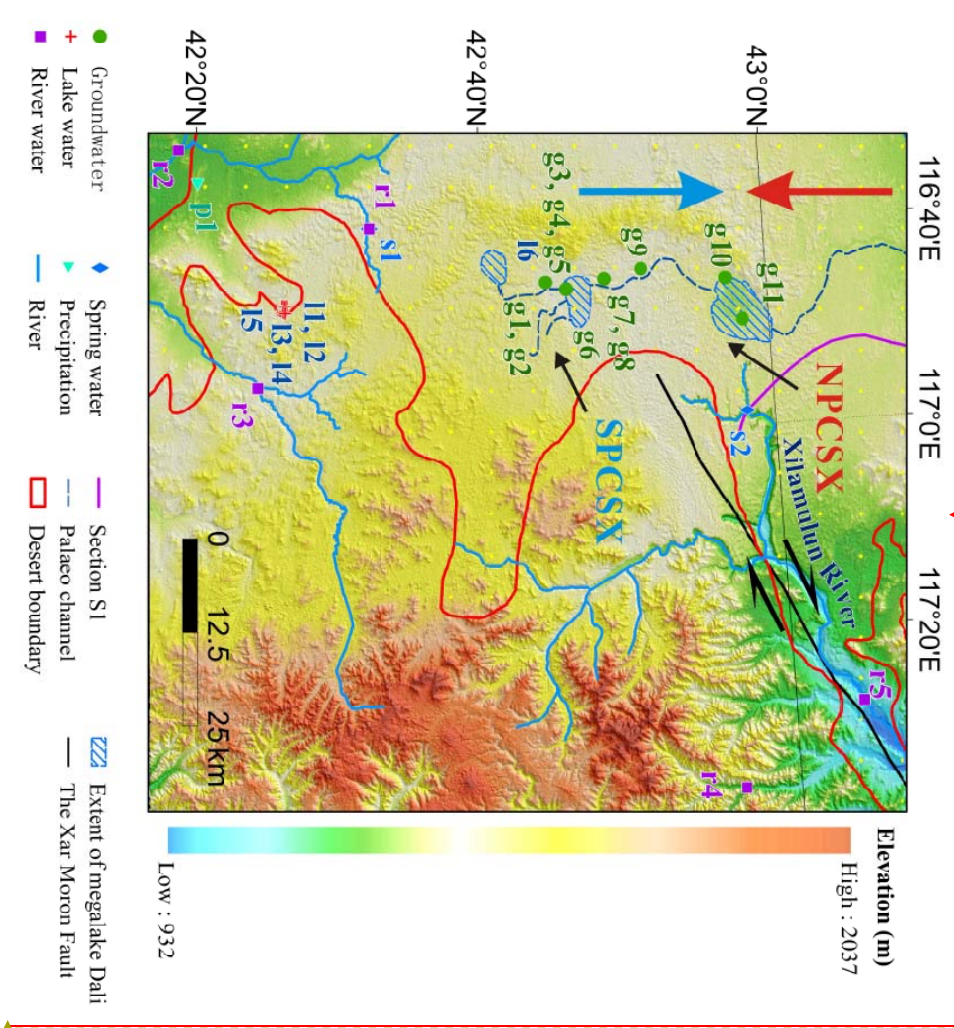



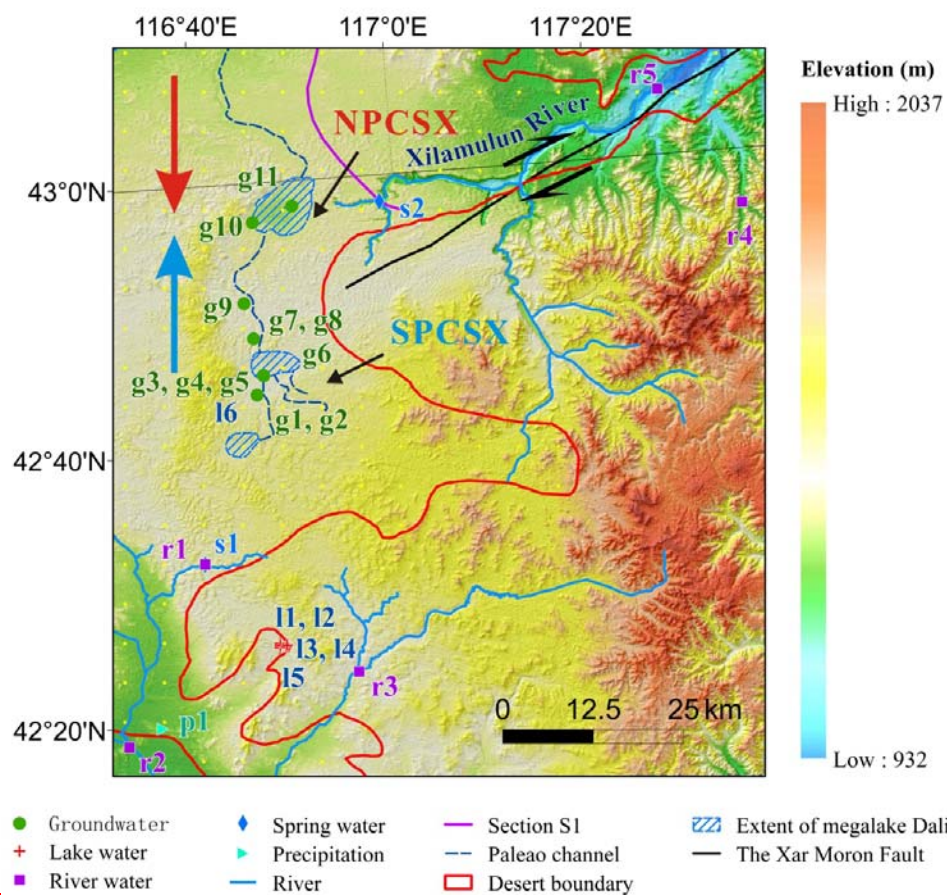

**Fig. 53.** The Schoeller diagram(Schoeller, 1955), a fingerprint diagram showing the variations of multiple ions' concentrations in the studied water samples in an equivalent unit. The  $\text{HCO}_3+\text{CO}_3$  concentration in the sample p1 was not shown, due to its value being lower than the detection limit.

带格式的: 字体颜色: 自动设置

带格式的: 无下划线, 字体颜色: 自动设置

带格式的: 无下划线, 字体颜色: 自动设置

带格式的: 无下划线, 字体颜色: 自动设置

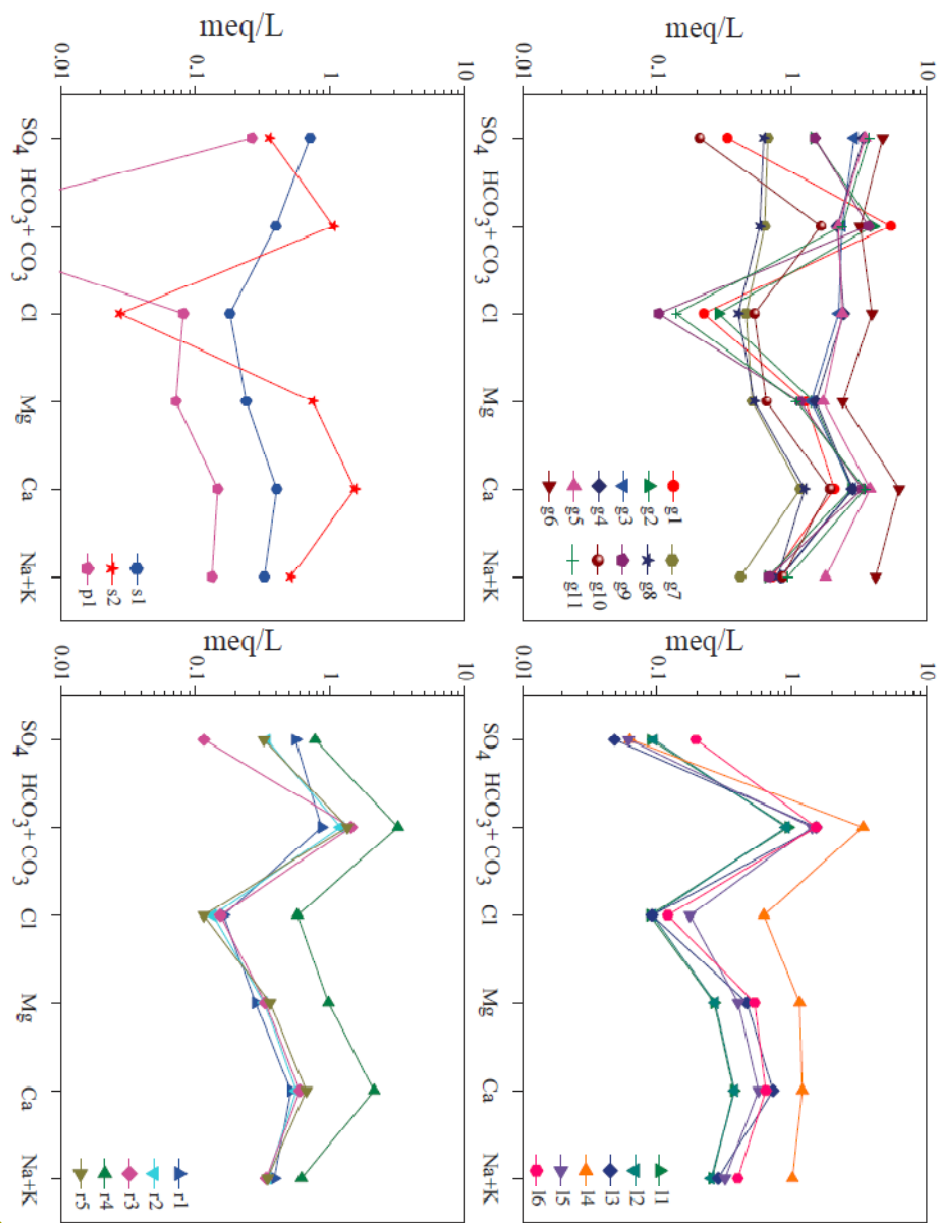

带格式的: 字体: (默认) Times New Roman, 10 磅, 无下划线, 字体颜色: 自动设置

带格式的: 居中

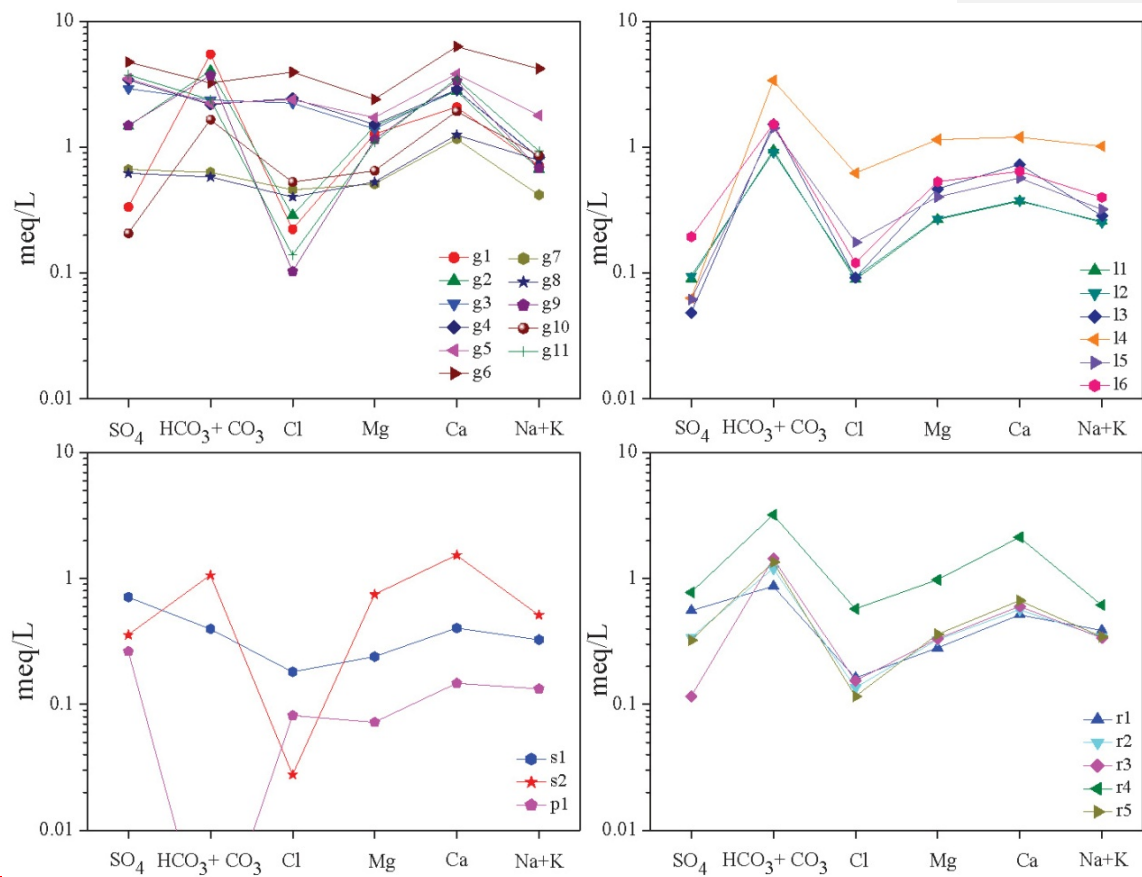

**Fig. 6-4.** The Piper diagram (Piper, 1944) showing the relative abundances of major cations and anions in the studied water samples. Major water types are also shown in this diagram.

带格式的: 无下划线, 字体颜色: 自动设置

带格式的: 无下划线, 字体颜色: 自动设置

带格式的: 无下划线, 字体颜色: 自动设置

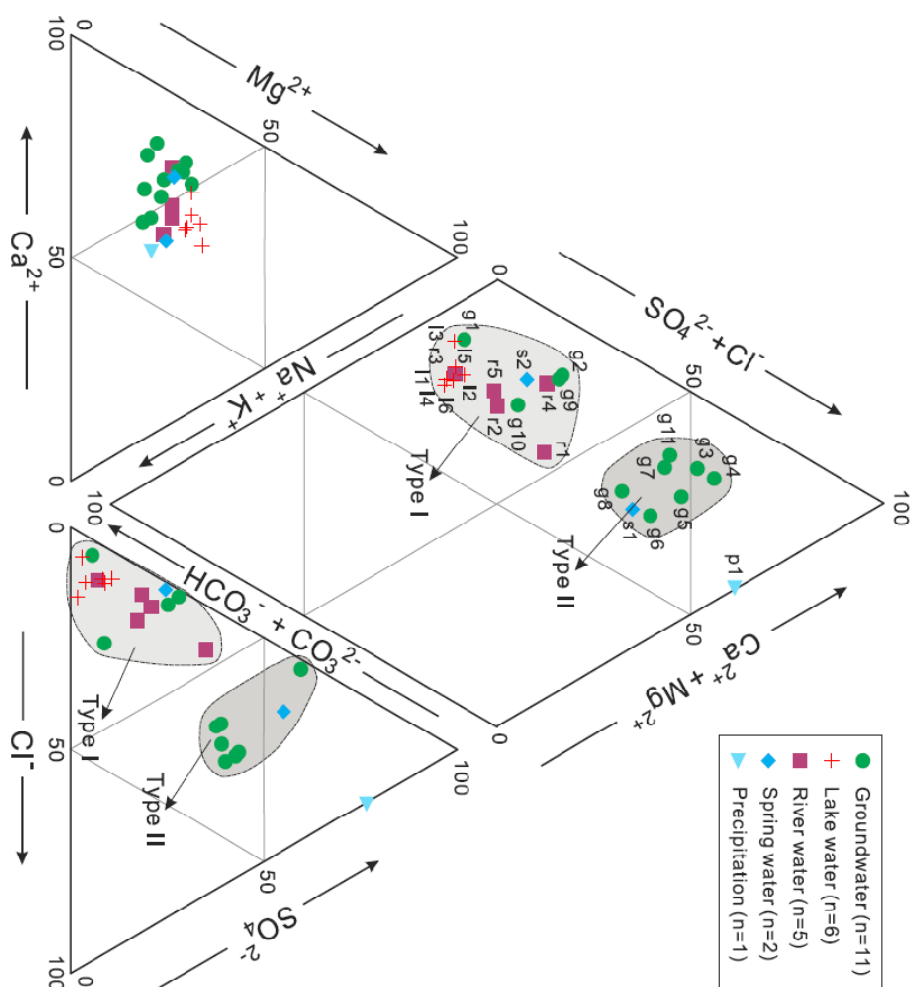

带格式的: 字体: (默认) Times New Roman, 10 磅, 无下划线, 字体颜色: 自动设置

带格式的: 居中



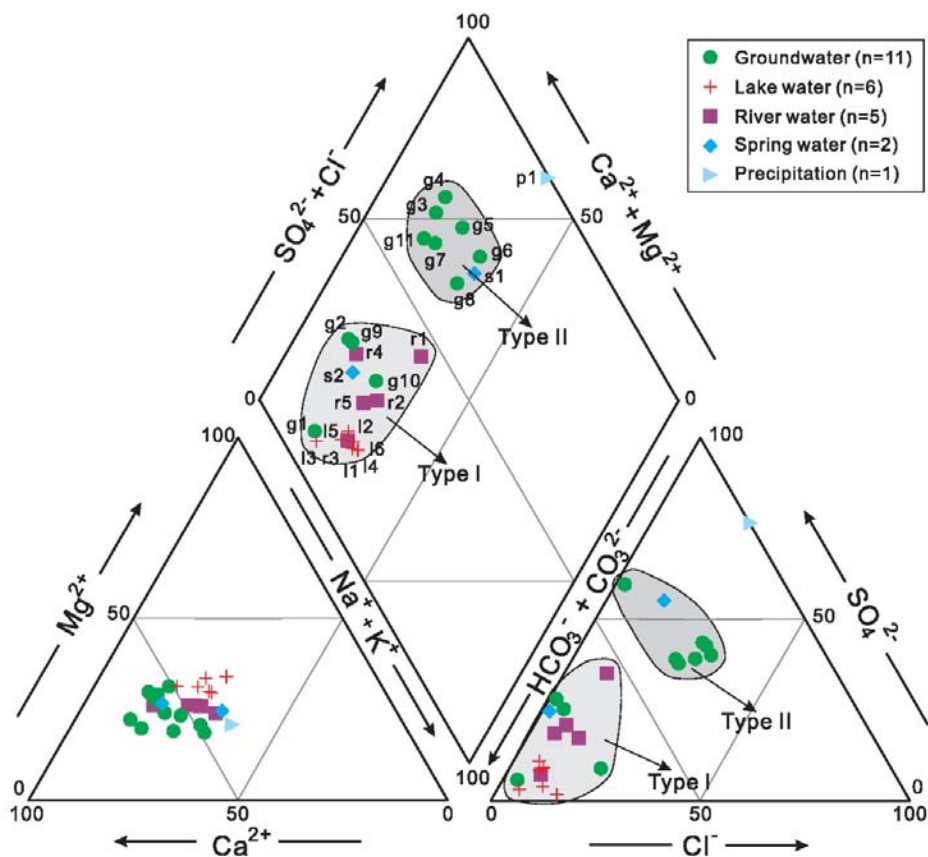

Fig. 5. An Expanded Durov diagram (Durov, 1948; Lloyd and Heathcote, 1985; Al-Bassam et al., 1997; Chadha, 1999; Al-Bassam and Khalil, 2012) showing the linear dissolution or mixing process for groundwater and the ion-exchange process occurred in the groundwater and other waters in the study area.

带格式的: 无下划线, 字体颜色: 自动设置

带格式的: 字体: 加粗, 无下划线, 字体颜色: 自动设置

带格式的: 字体: 加粗

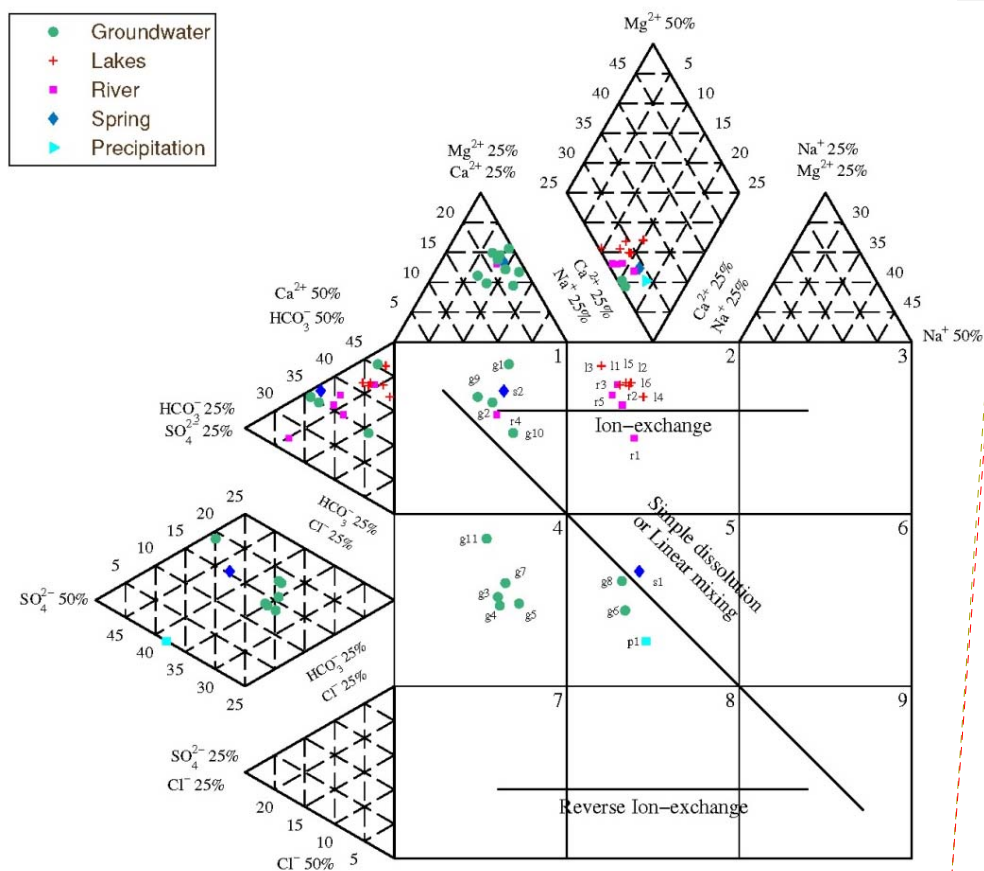

带格式的: 字体: (默认) Times New Roman, 10 磅, 加粗, 无下划线, 字体颜色: 自动设置

带格式的: 字体: 加粗

**Fig. 76.** The bivariate diagram of  $\delta D-H$  and  $\delta^{18}O$ , i.e. the Craig diagram, for the natural water samples in this study. Different relationships between the groundwaters, lake waters, river waters, spring waters and the precipitation waters are **emphasizedly** illustrated. AWMB, the annual weighted mean value at the Baotou station; AWMT, the annual weighted mean value at the Tianjin station; LWMB, the long-term weighted means at the Baotou station; LWMT, the long-term weighted means at the Tianjin station; GMWL, the Global Meteoric Water Line; LMWL-B, the local meteoric water line calculated based on the data from the Baotou station; LWML-T, the local meteoric water line calculated based on the data from the Tianjin station; EL1, the evaporation line calculated based on the data of water samples collected in this study eastern Otindag.

带格式的: 无下划线, 字体颜色: 自动设置

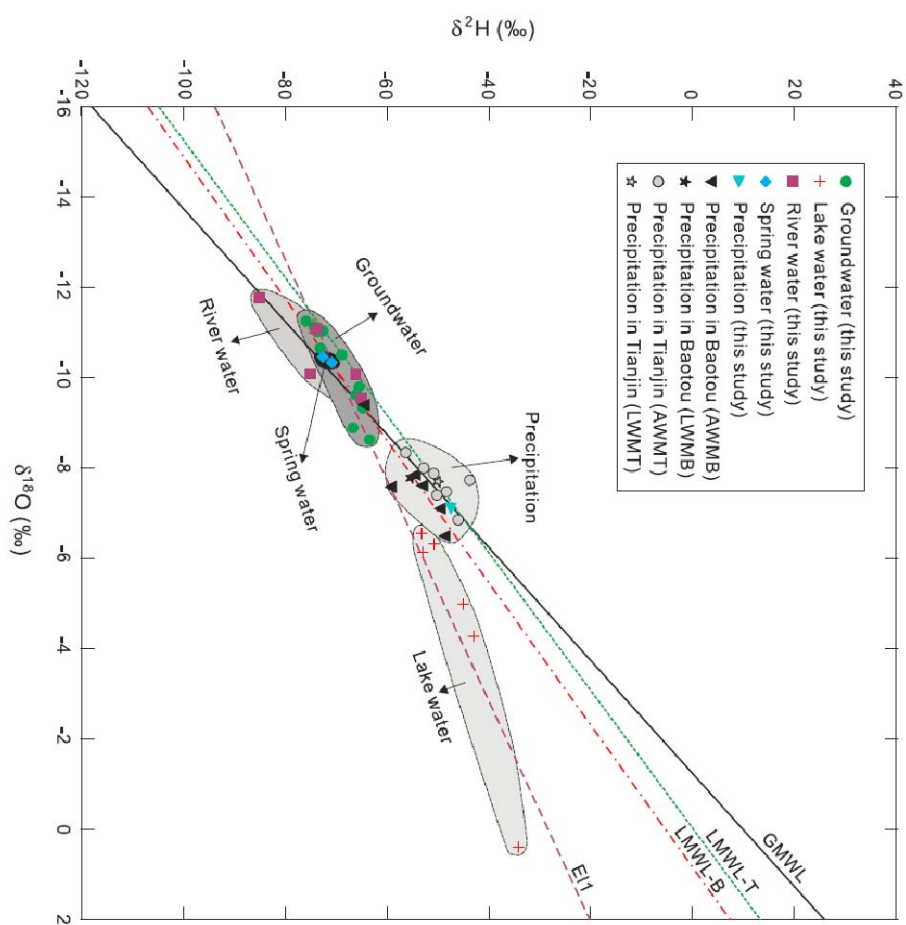

带格式的: 字体: (默认) Times New Roman, 10 磅, 无下划线, 字体颜色: 自动设置

带格式的: 居中

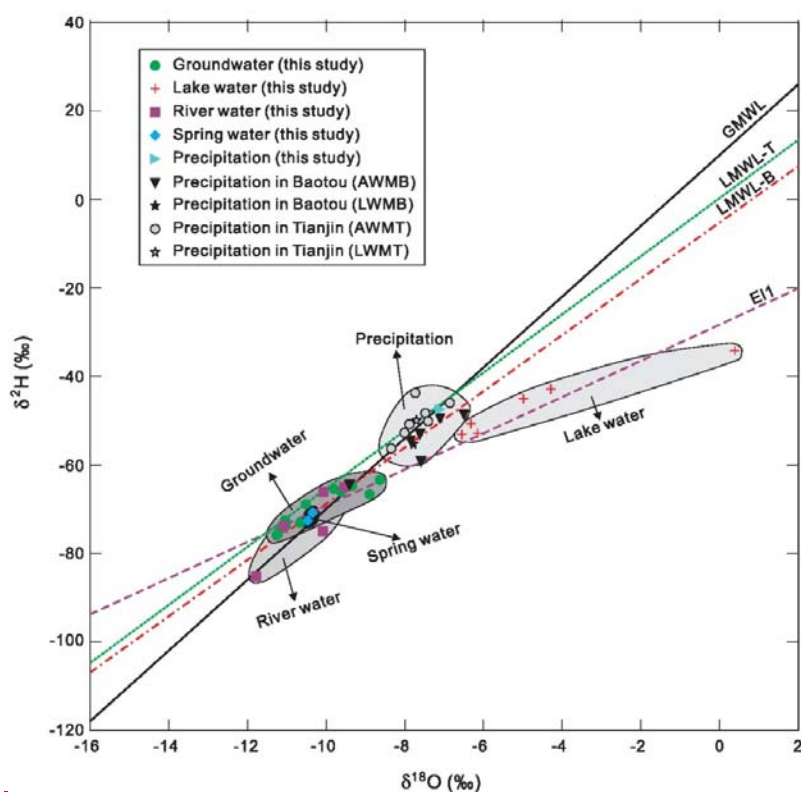

**Fig. 87.** The seasonal mean distributions of (a) precipitation (a), (b) surface air temperature (b) and (c) water vapor pressure (c) from the Baotou and Tianjin weather stations (station sites seen in Fig. 1a) in the surrounding areas of the Otindag for the period in recent thirty years (1981-2010).

带格式的: 无下划线, 字体颜色: 自动设置

带格式的: 字体: 加粗, 无下划线, 字体颜色: 自动设置

带格式的: 无下划线, 字体颜色: 自动设置

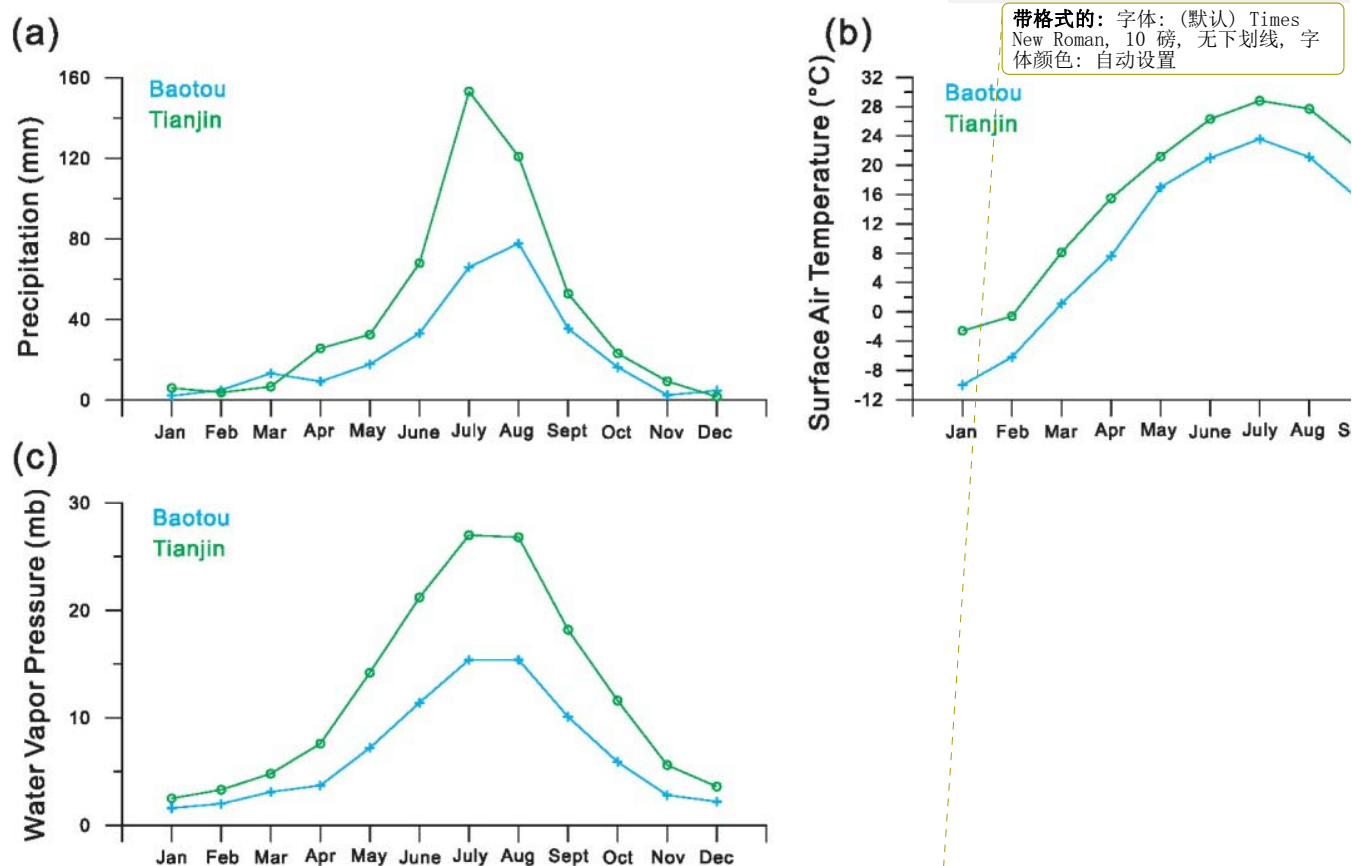

Fig. 8. The seasonal mean distributions of (a)  $\delta^{18}\text{O}$  and (b)  $\delta\text{D}^3\text{H}$  values in precipitation from the Baotou and Tianjin weather stations in the surrounding areas of the Otindag for the period in recent sixteen years (1986-2001).

带格式的: 无下划线, 字体颜色: 自动设置

带格式的: 字体: (默认) Times  
New Roman, 10 磅, 无下划线, 字  
体颜色: 自动设置

带格式的: 居中

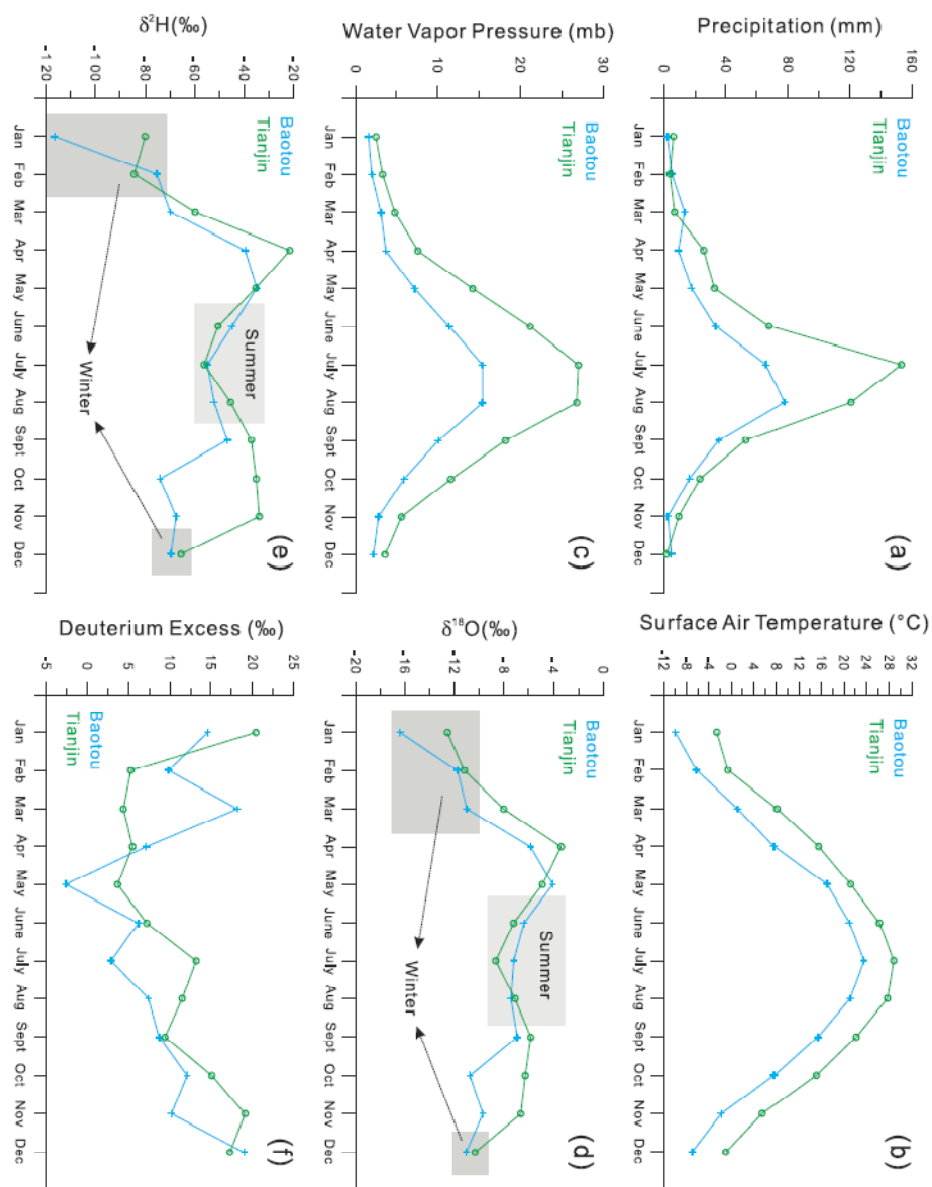

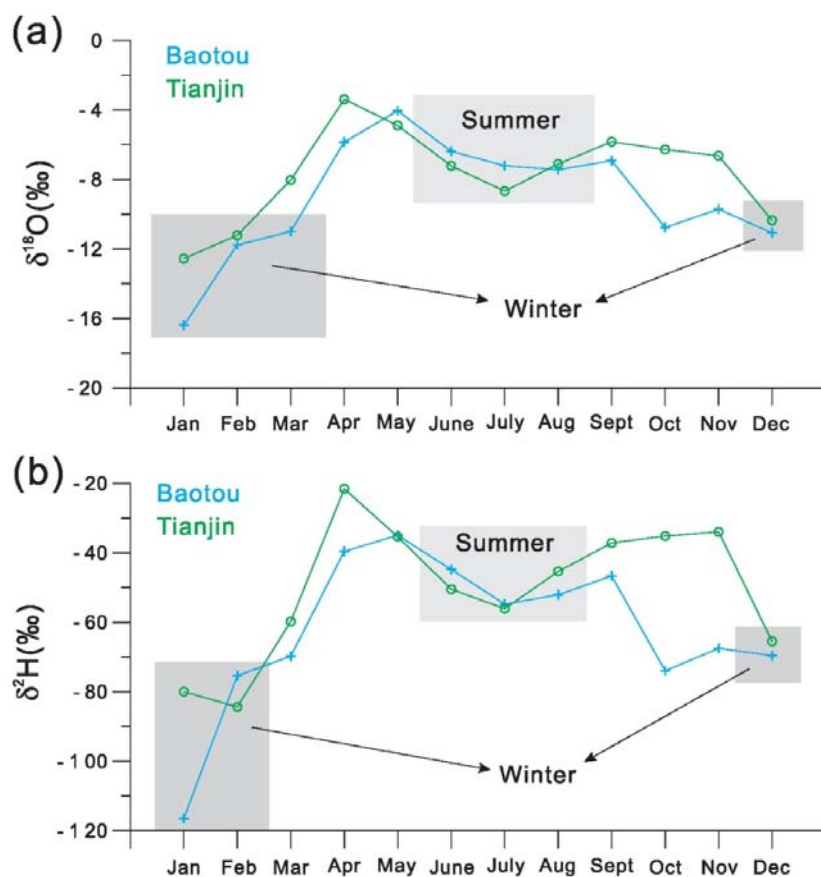

**Fig. 9.** The bivariate diagram of  $\delta^2\text{H}$  and  $\delta^{18}\text{O}$ , i.e. the Craig diagram, for the natural water samples collected in the Otindag (this study) and the Dali Basins study. Different relationships between the groundwaters, lake waters, river waters, spring waters and the precipitation waters are emphasized clearly illustrated. AWMB, AWMT, LWMB, LWMT, GMWL, LMWL-B, LWML-T, and EL1 are the same as in Fig. 76. EL2, the evaporation line calculated based on the data from the groundwater, lake water, river water and spring water samples collected from in the Otindag and in the Dali Basin. The data for of the Dali were taken from are cited from previous studies (Chen et al. (-2008) and Zhen et al. (-2014)).

带格式的: 无下划线, 字体颜色: 自动设置

带格式的: 字体: 非加粗, 无下划线, 字体颜色: 自动设置

带格式的: 无下划线, 字体颜色: 自动设置



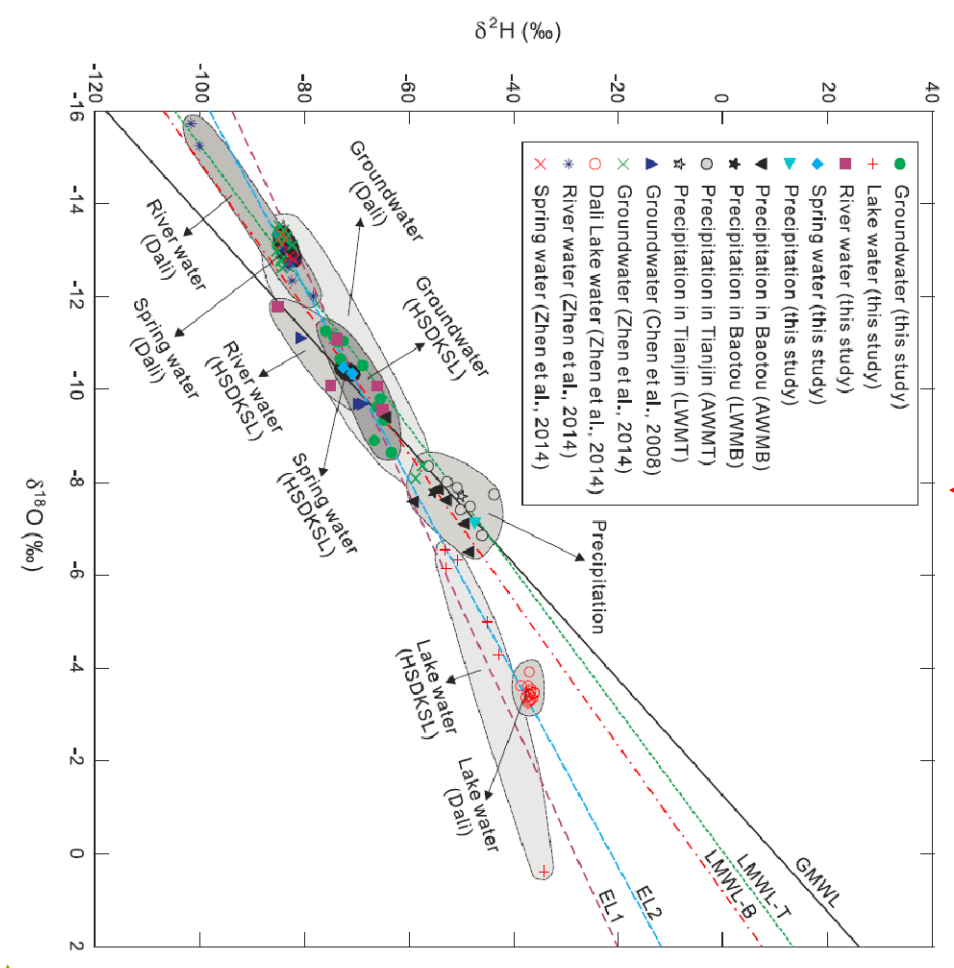

带格式的: 字体: (默认) Times New Roman, 10 磅, 无下划线, 字体颜色: 自动设置

带格式的: 居中

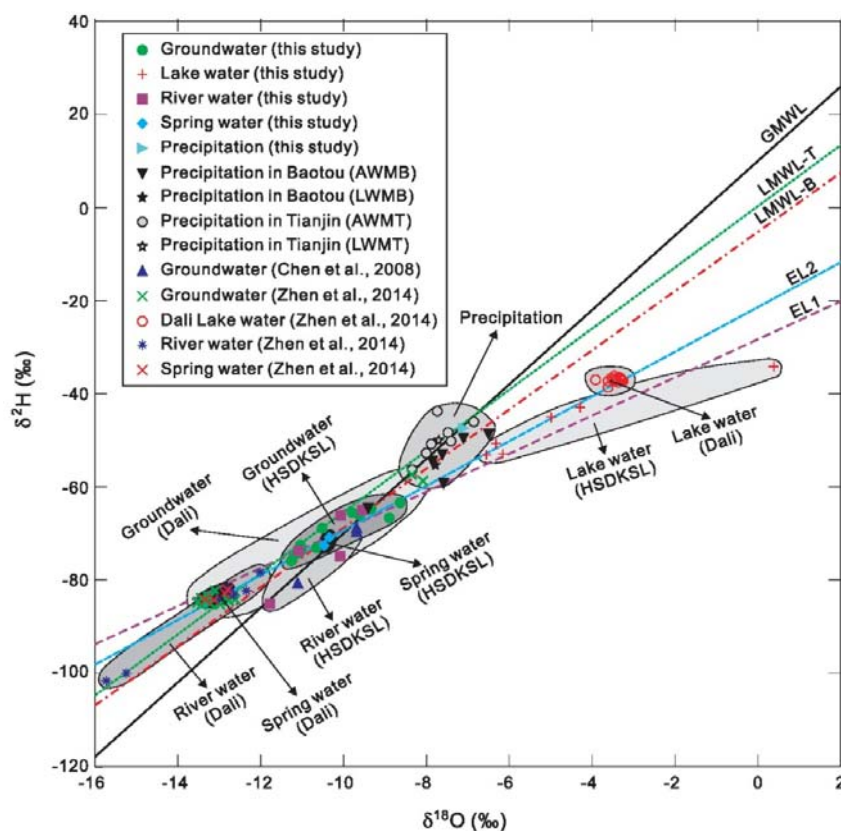

**Fig. 10.** (a) The sketch map showing the relationship between the groundwaters in the NPCSX and SPCSX areas, based on variations of (a) the chloride concentrations, (a) and (b) the TDS (b) concentrations, (c) the  $\delta^{18}\text{O}$  values and (d) the  $\delta\text{D}$  values of these water samples versus their distances away from the water sample g1 along the palaeo river channel (PCSX) from south to north.

带格式的: 无下划线, 字体颜色: 自动设置

带格式的: 无下划线, 字体颜色: 自动设置, 图案: 清除

带格式的: 无下划线, 字体颜色: 自动设置

带格式的: 无下划线, 字体颜色: 自动设置, 图案: 清除

带格式的: 无下划线, 字体颜色: 自动设置

带格式的: 无下划线, 字体颜色: 自动设置, 图案: 清除

带格式的: 无下划线, 字体颜色: 自动设置

带格式的: 无下划线, 字体颜色: 自动设置, 图案: 清除

带格式的: 无下划线, 字体颜色: 自动设置

带格式的: 无下划线, 字体颜色: 自动设置, 图案: 清除

带格式的: 无下划线, 字体颜色: 自动设置

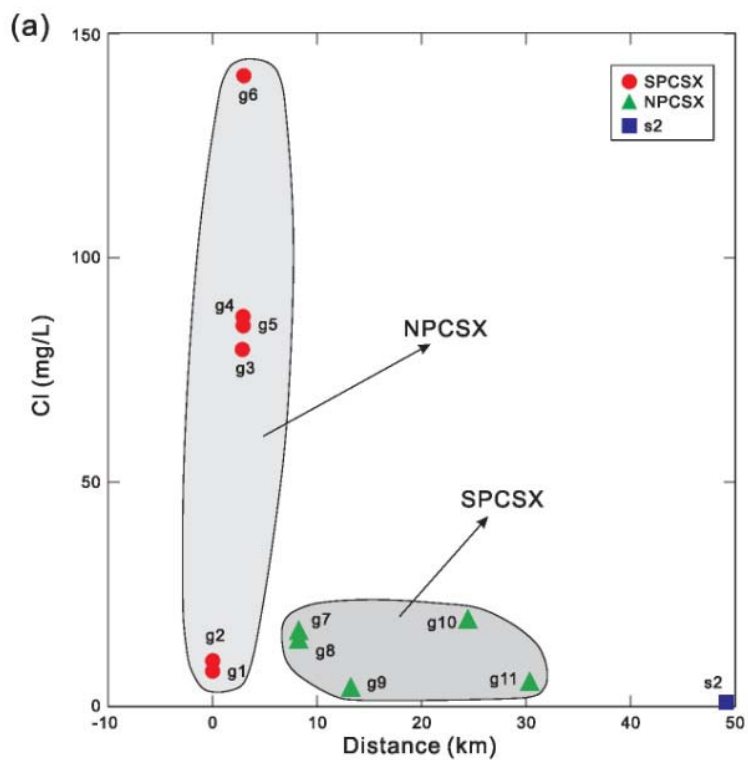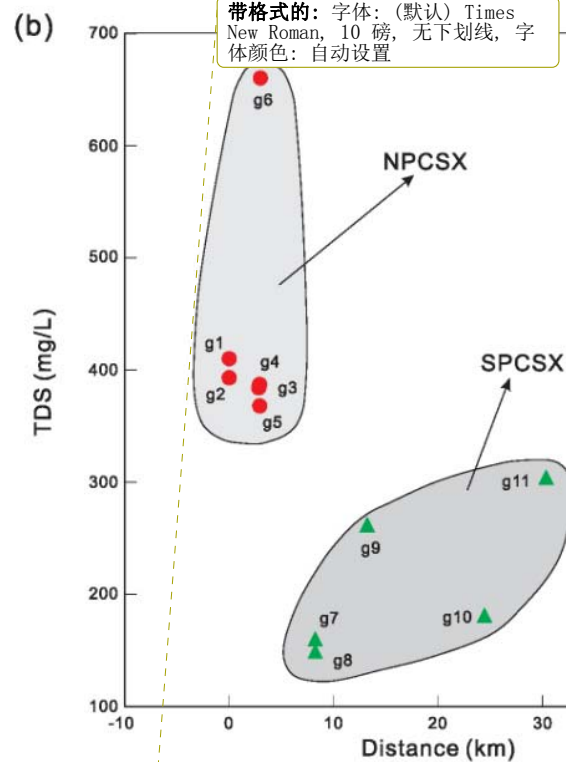

Fig. 11. The bivariate plot of Cl vs.  $\delta^2\text{H}$  in the groundwaters from the PCSX region, which showing that no significant evaporation process has been experienced by these groundwaters.

带格式的: 无下划线, 字体颜色: 自动设置

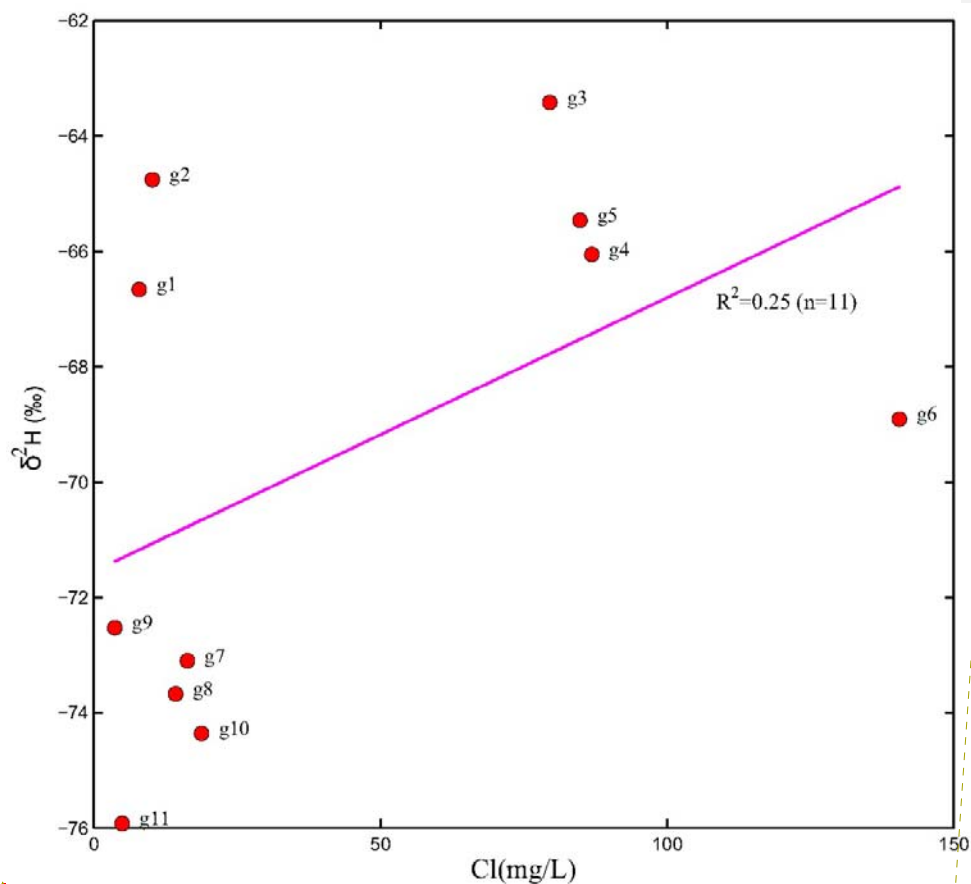

带格式的: 字体: (默认) Times New Roman, 10 磅, 无下划线, 字体颜色: 自动设置

Fig. 12. Variations of  $\delta^{18}\text{O}$  (a) and  $\delta^2\text{H}$  (b) in the groundwaters versus their distances away from the groundwater sample g1 along the palace river channel (PCSX) from south to north. The dashed line in (c) and (d) represents the corresponding values of the spring water sample s2, and which is just well divided the samples into the NPCSX and the SPCSX parts.

带格式的: 无下划线, 字体颜色: 自动设置

带格式的: 无下划线, 字体颜色: 自动设置, 图案: 清除

带格式的: 无下划线, 字体颜色: 自动设置

带格式的: 无下划线, 字体颜色: 自动设置, 图案: 清除

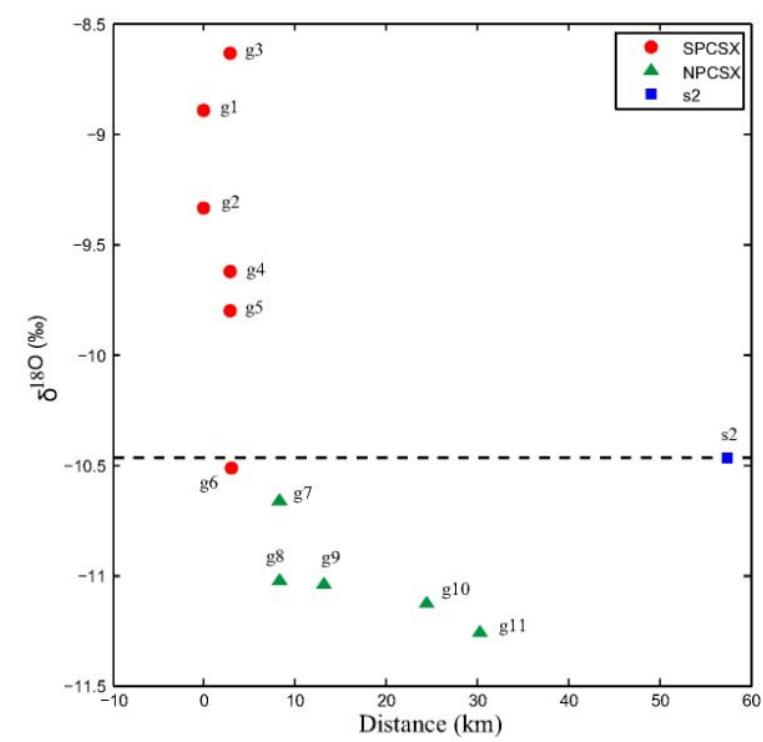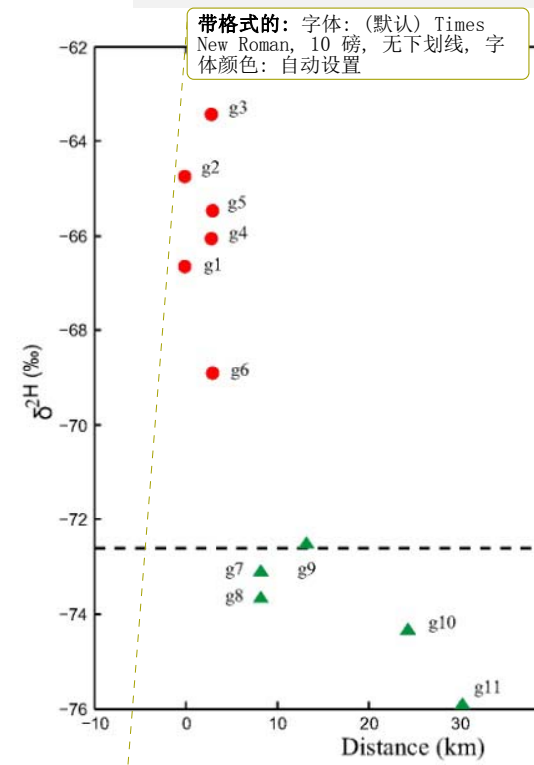

Fig. 13. The bivariate plots of  $\delta^2\text{H}$ (a) and  $\delta^{18}\text{O}$  (b) vs. deuterium excess for the groundwaters in the PCSX area. (c)

带格式的: 字体: (默认) Times New Roman, 10 磅, 无下划线, 字体颜色: 自动设置

带格式的: 无下划线, 字体颜色: 自动设置

带格式的: 无下划线, 字体颜色: 自动设置, 图案: 清除

带格式的: 字体颜色: 自动设置

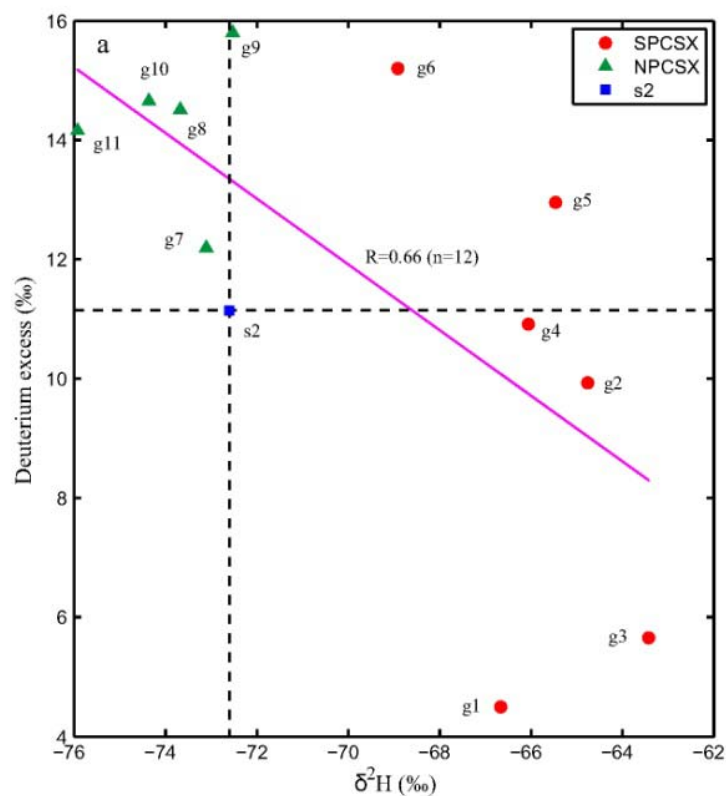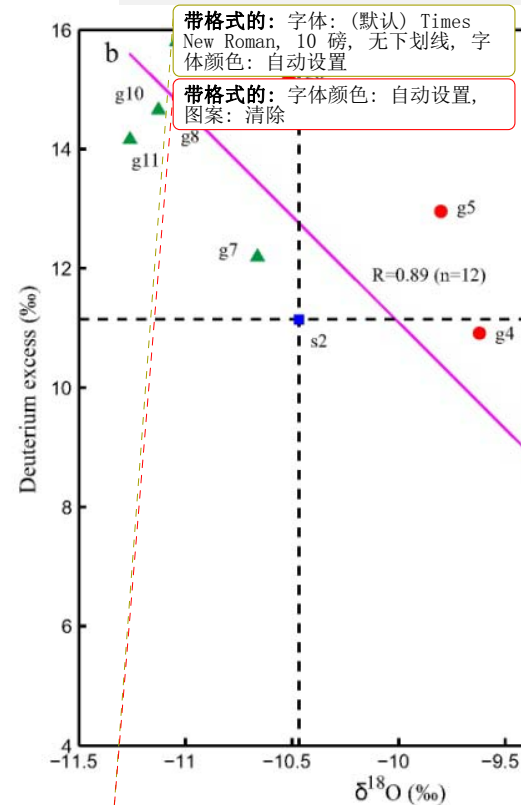

**Fig. 14.** Variations of tritium contents vs. deuterium excess (a) and TDS (b) for the groundwater samples in the study area. The sample g6 was omitted due to excluded because of its potential contamination.

带格式的: 无下划线, 字体颜色: 自动设置

带格式的: 字体: (默认) Times  
New Roman, 10 磅, 加粗, 无下划  
线, 字体颜色: 自动设置

带格式的: 居中

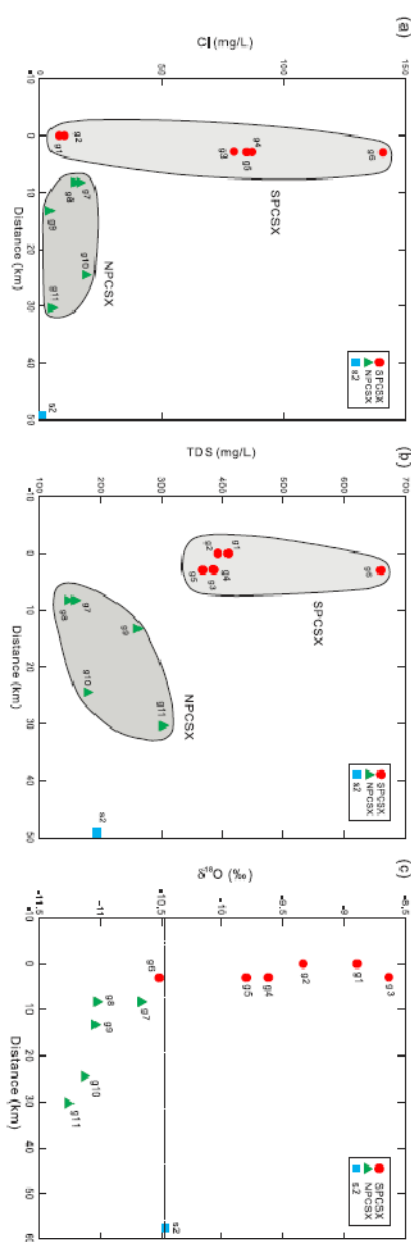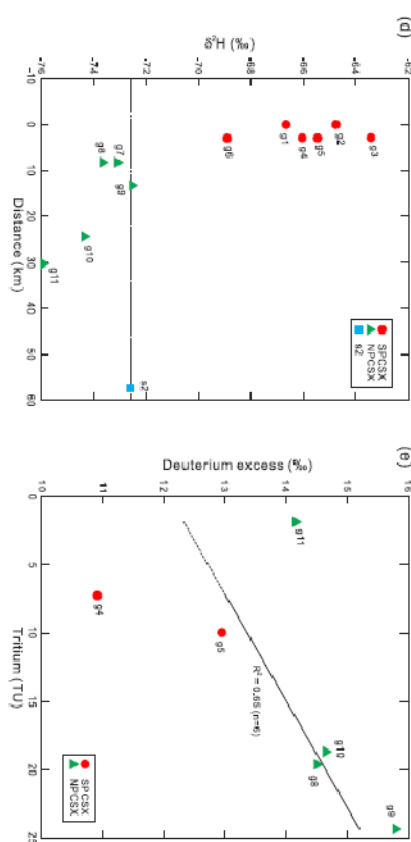



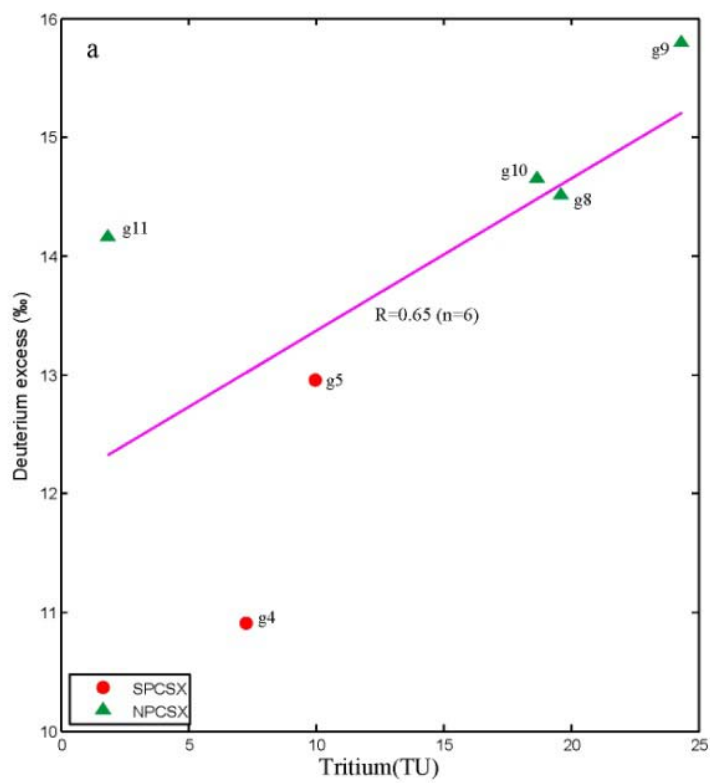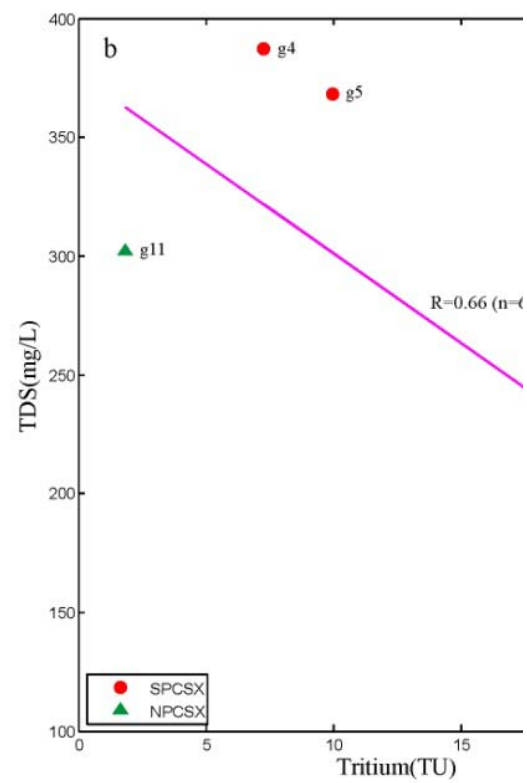

**Fig. 115.** Variation of the topographical elevation along the section S1 (see Fig. 1b) from the upstream of the Dali Lake to the location site of the spring water sample (s2) in the riverhead of the Xilamulun River. Note that no river water samples are shown in this figure.

带格式的: 无下划线, 字体颜色: 自动设置

带格式的: 字体颜色: 自动设置

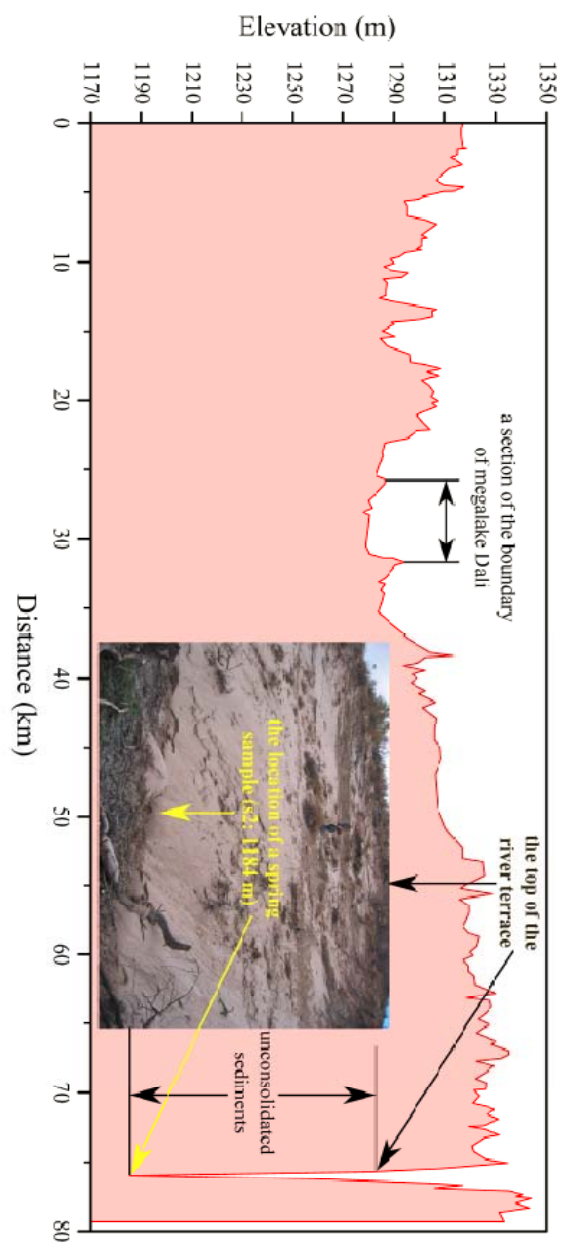

带格式的: 字体: (默认) Times New Roman, 10 磅, 无下划线, 字体颜色: 自动设置

带格式的: 居中, 行距: 单倍行距

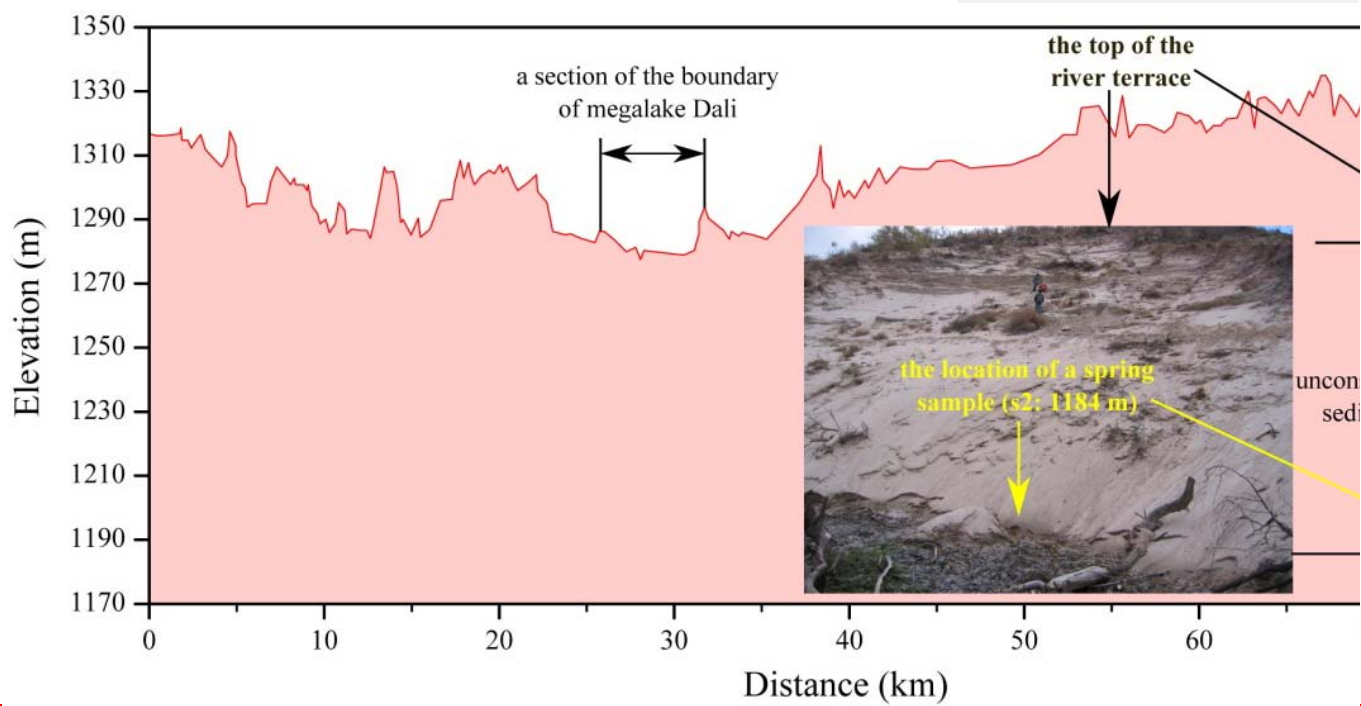

1591  
1592

带格式的: 无下划线, 字体颜色: 自动设置

带格式的: 定义网格后不调整右缩进, 不对齐到网格

1593  
1594

**Table Captions:**

**Table 1.**The physical parameters measured for the natural water samples in the study area.

| Sample ID | Water type    | Latitude (N, degree) | Longitude (E, degree) | Elevation (m a.s.l) | Depth (m) | Temperature (°C) | pH   | Eh (mV) | EC (μS/cm) | TDS (mg/L) | Salinity (‰) | Alkalinity (meq/L) | Hardness (°dH) |
|-----------|---------------|----------------------|-----------------------|---------------------|-----------|------------------|------|---------|------------|------------|--------------|--------------------|----------------|
| g1        | Groundwater   | 42.736306            | 116.747333            | 1396                | 12        | 5.8              | 6.72 | 3       | 769        | 410        | 0.6          | 5.47               | 9.42           |
| g2        | Groundwater   | 42.736306            | 116.747333            | 1396                | 26        | 6.0              | 6.91 | -10     | 736        | 393        | 0.5          | 4.07               | 11.96          |
| g3        | Groundwater   | 42.760194            | 116.760139            | 1355                | 32        | 7.7              | 6.88 | -6      | 725        | 384        | 0.5          | 2.39               | 11.94          |
| g4        | Groundwater   | 42.759694            | 116.760417            | 1360                | 7         | 10.0             | 6.74 | 1       | 725        | 387        | 0.5          | 2.20               | 12.28          |
| g5        | Groundwater   | 42.759556            | 116.760556            | 1362                | 27        | 7.6              | 6.46 | 16      | 691        | 368        | 0.5          | 2.23               | 15.57          |
| g6        | Groundwater   | 42.760111            | 116.760250            | 1365                | 7         | 10.3             | 6.26 | 22      | 1240       | 660        | 0.8          | 3.25               | 24.45          |
| g7        | Groundwater   | 42.806361            | 116.747806            | 1352                | 20        | 6.8              | 6.71 | 2       | 297        | 158        | 0.2          | 0.63               | 4.70           |
| g8        | Groundwater   | 42.806361            | 116.747806            | 1352                | 16        | 6.5              | 6.92 | -8      | 276        | 147        | 0.2          | 0.58               | 5.00           |
| g9        | Groundwater   | 42.850333            | 116.735722            | 1347                | 30        | 7.2              | 6.74 | -1      | 487        | 260        | 0.4          | 3.73               | 12.68          |
| g10       | Groundwater   | 42.949861            | 116.759194            | 1321                | 37        | 9.9              | 6.75 | -2      | 337        | 179        | 0.2          | 1.66               | 7.23           |
| g11       | Groundwater   | 42.967111            | 116.827528            | 1317                | 60        | 8.6              | 6.99 | -14     | 571        | 302        | 0.4          | 2.40               | 12.94          |
| l1        | Lake water    | 42.424611            | 116.769194            | 1368                | /         | 16.9             | 9.44 | -151    | 126        | 67         | 0.1          | 0.95               | 1.79           |
| l2        | Lake water    | 42.424611            | 116.769194            | 1368                | /         | 19.6             | 9.18 | -137    | 132        | 70         | 0.1          | 0.92               | 1.82           |
| l3        | Lake water    | 42.424611            | 116.757806            | 1365                | /         | 20.2             | 7.38 | -36     | 196        | 105        | 0.1          | 1.53               | 3.36           |
| l4        | Lake water    | 42.427083            | 116.757639            | 1366                | /         | 20.5             | 7.87 | -64     | 448        | 238        | 0.2          | 3.42               | 6.61           |
| l5        | Lake water    | 42.421806            | 116.756917            | 1360                | /         | 20.1             | 8.23 | -83     | 173        | 92         | 0.1          | 1.43               | 2.73           |
| l6        | Lake water    | 42.736389            | 116.747222            | 1374                | /         | 10.7             | 8.35 | -89     | 194        | 103        | 0.1          | 1.53               | 3.30           |
| r1        | River water   | 42.530917            | 116.641250            | 1355                | /         | 20.6             | 7.31 | -33     | 180        | 96         | 0.1          | 0.88               | 2.23           |
| r2        | River water   | 42.310883            | 116.494817            | 1231                | /         | 14.9             | 7.67 | -52     | 178        | 95         | 0.1          | 1.21               | 2.50           |
| r3        | River water   | 42.385778            | 116.886194            | 1362                | /         | 9.5              | 7.62 | -48     | 177        | 94         | 0.1          | 1.45               | 2.62           |
| r4        | River water   | 42.931417            | 117.585306            | 1217                | /         | 10.5             | 7.97 | -69     | 474        | 252        | 0.3          | 3.22               | 8.73           |
| r5        | River water   | 43.079083            | 117.457389            | 1006                | /         | 12.9             | 7.87 | -62     | 191        | 101        | 0.1          | 1.37               | 2.88           |
| s1        | Spring water  | 42.530917            | 116.641250            | 1359                | /         | 20.9             | 6.63 | 5       | 165        | 88         | 0.1          | 0.40               | 1.81           |
| s2        | Spring water  | 42.965417            | 116.975361            | 1184                | /         | 19.0             | 7.47 | -46     | 371        | 195        | 0.2          | 1.07               | 6.40           |
| p1        | Precipitation | 42.330750            | 116.551694            | 1260                | /         | 20.2             | 4.61 | 109     | 78         | 42         | 0.0          | /                  | 0.61           |

1595

1596 **Table 2.** The concentrations of major cations and anions measured for the water samples in the study area.

| Sample | F <sup>-</sup><br>(mg/L) | Cl <sup>-</sup><br>(mg/L) | NO <sub>2</sub> <sup>-</sup><br>(mg/L) | NO <sub>3</sub> <sup>-</sup><br>(mg/L) | SO <sub>4</sub> <sup>2-</sup><br>(mg/L) | CO <sub>3</sub> <sup>2-</sup><br>(mg/L) | HCO <sub>3</sub> <sup>-</sup><br>(mg/L) | Li <sup>+</sup><br>(mg/L) | Na <sup>+</sup><br>(mg/L) | NH <sub>4</sub> <sup>+</sup><br>(mg/L) | K <sup>+</sup><br>(mg/L) | Mg <sup>2+</sup><br>(mg/L) | Ca <sup>2+</sup><br>(mg/L) |
|--------|--------------------------|---------------------------|----------------------------------------|----------------------------------------|-----------------------------------------|-----------------------------------------|-----------------------------------------|---------------------------|---------------------------|----------------------------------------|--------------------------|----------------------------|----------------------------|
| g1     | 0.13                     | 7.90                      | 2.32                                   | 0.48                                   | 16.10                                   | 0.00                                    | 334.60                                  | 0.02                      | 13.79                     | 10.54                                  | 4.59                     | 15.52                      | 41.8                       |
| g2     | 0.21                     | 10.21                     | 0.00                                   | 6.15                                   | 70.61                                   | 0.10                                    | 247.70                                  | 0.02                      | 13.36                     | 6.56                                   | 3.45                     | 17.91                      | 56.0                       |
| g3     | 0.11                     | 79.56                     | 0.00                                   | 0.00                                   | 140.76                                  | 0.00                                    | 145.40                                  | 0.01                      | 17.92                     | 2.28                                   | 1.76                     | 17.06                      | 57.2                       |
| g4     | 0.10                     | 86.90                     | 0.00                                   | 5.73                                   | 164.80                                  | 0.00                                    | 133.70                                  | 0.02                      | 18.02                     | 0.00                                   | 2.02                     | 18.50                      | 57.3                       |
| g5     | 0.07                     | 84.82                     | 0.00                                   | 0.76                                   | 169.30                                  | 0.00                                    | 136.20                                  | 0.00                      | 39.68                     | 1.02                                   | 2.72                     | 20.94                      | 76.8                       |
| g6     | 0.07                     | 140.54                    | 0.00                                   | 110.77                                 | 228.80                                  | 0.00                                    | 198.20                                  | 0.00                      | 79.80                     | 0.00                                   | 29.47                    | 29.25                      | 126.3                      |
| g7     | 0.37                     | 16.31                     | 0.00                                   | 306.31                                 | 32.01                                   | 0.00                                    | 38.70                                   | 0.06                      | 7.83                      | 0.00                                   | 3.09                     | 6.21                       | 23.3                       |
| g8     | 0.29                     | 14.28                     | 0.00                                   | 35.49                                  | 29.89                                   | 0.00                                    | 35.50                                   | 0.02                      | 16.21                     | 0.11                                   | 3.38                     | 6.44                       | 25.1                       |
| g9     | 0.10                     | 3.66                      | 0.15                                   | 1.19                                   | 71.56                                   | 0.00                                    | 227.40                                  | 0.06                      | 12.92                     | 0.55                                   | 4.50                     | 14.06                      | 67.5                       |
| g10    | 0.24                     | 18.80                     | 0.00                                   | 49.49                                  | 9.97                                    | 0.00                                    | 101.10                                  | 0.00                      | 18.54                     | 0.00                                   | 2.09                     | 7.92                       | 38.6                       |
| g11    | 0.28                     | 4.94                      | 0.00                                   | 0.00                                   | 181.53                                  | 0.00                                    | 146.20                                  | 0.05                      | 20.40                     | 2.59                                   | 2.06                     | 13.30                      | 70.5                       |
| l1     | 0.16                     | 3.15                      | 0.00                                   | 0.07                                   | 4.32                                    | 0.00                                    | 57.90                                   | 0.01                      | 5.42                      | 0.00                                   | 0.86                     | 3.24                       | 7.49                       |
| l2     | 0.16                     | 3.30                      | 0.00                                   | 1.66                                   | 4.57                                    | 0.00                                    | 55.80                                   | 0.00                      | 5.33                      | 0.00                                   | 0.84                     | 3.29                       | 7.61                       |
| l3     | 0.11                     | 3.27                      | 0.00                                   | 0.61                                   | 2.33                                    | 0.00                                    | 93.30                                   | 0.01                      | 5.88                      | 0.00                                   | 1.19                     | 5.68                       | 14.6                       |
| l4     | 0.17                     | 22.12                     | 0.00                                   | 0.39                                   | 3.04                                    | 0.10                                    | 207.60                                  | 0.00                      | 9.21                      | 0.70                                   | 24.21                    | 14.02                      | 24.1                       |
| l5     | 0.09                     | 6.24                      | 0.00                                   | 0.65                                   | 2.97                                    | 0.10                                    | 86.80                                   | 0.01                      | 6.72                      | 0.00                                   | 1.16                     | 4.91                       | 11.4                       |
| l6     | 0.18                     | 4.29                      | 0.00                                   | 0.80                                   | 9.34                                    | 0.10                                    | 93.00                                   | 0.01                      | 8.41                      | 0.00                                   | 1.36                     | 6.47                       | 12.9                       |
| r1     | 0.30                     | 5.76                      | 0.00                                   | 2.38                                   | 26.67                                   | 0.30                                    | 52.40                                   | 0.01                      | 7.15                      | 0.00                                   | 2.99                     | 3.41                       | 10.3                       |
| r2     | 0.19                     | 4.82                      | 0.00                                   | 0.65                                   | 16.40                                   | 0.10                                    | 73.10                                   | 0.01                      | 6.82                      | 0.00                                   | 1.92                     | 3.96                       | 11.3                       |
| r3     | 0.64                     | 5.46                      | 0.00                                   | 0.43                                   | 5.57                                    | 0.00                                    | 88.10                                   | 0.01                      | 7.11                      | 0.00                                   | 1.13                     | 4.04                       | 12.0                       |
| r4     | 1.08                     | 20.39                     | 0.00                                   | 19.27                                  | 37.25                                   | 0.50                                    | 195.00                                  | 0.01                      | 13.02                     | 0.00                                   | 1.96                     | 11.90                      | 42.8                       |
| r5     | 0.19                     | 4.10                      | 0.00                                   | 1.08                                   | 15.57                                   | 0.00                                    | 82.60                                   | 0.01                      | 6.71                      | 0.00                                   | 2.08                     | 4.38                       | 13.4                       |
| s1     | 0.16                     | 6.44                      | 0.00                                   | 1.95                                   | 34.25                                   | 0.00                                    | 24.30                                   | 0.02                      | 6.56                      | 0.00                                   | 1.62                     | 2.92                       | 8.10                       |
| s2     | 0.05                     | 0.98                      | 0.00                                   | 0.45                                   | 17.15                                   | 0.00                                    | 64.90                                   | 0.02                      | 9.87                      | 0.00                                   | 3.32                     | 9.10                       | 30.7                       |
| p1     | 0.61                     | 2.90                      | 0.00                                   | 9.46                                   | 12.65                                   | 0.00                                    | 0.00                                    | 0.00                      | 2.09                      | 2.07                                   | 1.64                     | 0.88                       | 2.95                       |

1597  
1598  
1599

1600 | **Table 3.** The analytical data of stable and radioactive isotopes measured for the water samples in this study.

| Sample ID | $\delta D^2H$<br>(‰) | σ‰    | $\delta^{18}O$<br>(‰) | σ‰    | deuterium<br>excess (d) | Tritium<br>( $^3H$ ) (TU) |
|-----------|----------------------|-------|-----------------------|-------|-------------------------|---------------------------|
| g1        | -66.664              | 0.199 | -8.895                | 0.026 | 4.496                   | /                         |
| g2        | -64.758              | 0.291 | -9.336                | 0.039 | 9.930                   | /                         |
| g3        | -63.424              | 0.269 | -8.635                | 0.008 | 5.656                   | /                         |
| g4        | -66.055              | 0.149 | -9.621                | 0.062 | 10.913                  | 7.250                     |
| g5        | -65.462              | 0.111 | -9.802                | 0.027 | 12.954                  | 9.975                     |
| g6        | -68.913              | 0.287 | -10.514               | 0.039 | 15.199                  | 22.908                    |
| g7        | -73.105              | 0.298 | -10.662               | 0.041 | 12.191                  | /                         |
| g8        | -73.676              | 0.220 | -11.023               | 0.037 | 14.508                  | 19.611                    |
| g9        | -72.530              | 0.181 | -11.041               | 0.015 | 15.798                  | 24.345                    |
| g10       | -74.362              | 0.201 | -11.127               | 0.026 | 14.654                  | 18.681                    |
| g11       | -75.924              | 0.340 | -11.260               | 0.015 | 14.156                  | 1.860                     |
| l1        | -53.128              | 0.229 | -6.553                | 0.002 | -0.704                  | /                         |
| l2        | -50.721              | 0.304 | -6.320                | 0.026 | -0.161                  | /                         |
| l3        | -42.877              | 0.239 | -4.292                | 0.034 | -8.545                  | /                         |
| l4        | -34.155              | 0.243 | 0.381                 | 0.040 | -37.203                 | /                         |
| l5        | -45.057              | 0.206 | -4.987                | 0.009 | -5.161                  | /                         |
| l6        | -52.866              | 0.187 | -6.150                | 0.049 | -3.666                  | /                         |
| r1        | -66.157              | 0.118 | -10.069               | 0.015 | 14.395                  | /                         |
| r2        | -64.996              | 0.148 | -9.549                | 0.012 | 11.396                  | /                         |
| r3        | -73.790              | 0.315 | -11.083               | 0.021 | 14.874                  | /                         |
| r4        | -85.155              | 0.244 | -11.781               | 0.005 | 9.093                   | /                         |
| r5        | -74.978              | 0.195 | -10.084               | 0.003 | 5.694                   | /                         |
| s1        | -70.832              | 0.074 | -10.340               | 0.007 | 11.888                  | /                         |
| s2        | -72.601              | 0.281 | -10.468               | 0.046 | 11.143                  | /                         |
| p1        | -47.435              | 0.374 | -7.141                | 0.017 | 9.693                   | /                         |

1601  
1602  
1603

1604 | **Table 4.** The statistical frequency of rainfall events being >20 mm per year during the recent 30 years from 1985 to 2014. The data come from the China Meteorological Data  
1605 | Sharing Service System.

| Station    | One<br>time/year | Two<br>times/year | Three<br>times/year | Four<br>times/year | Five<br>times/year | Six<br>times/year | Seven<br>times/year | Mean<br>times/year |
|------------|------------------|-------------------|---------------------|--------------------|--------------------|-------------------|---------------------|--------------------|
| Duolun     | 2                | 8                 | 8                   | 4                  | 4                  | 3                 | 1                   | 3.4                |
| Xilinhaote | 8                | 5                 | 2                   | 6                  | 3                  | 2                 | 0                   | 2.5                |

1606 | **Table 5.** The measured contents of tritium in the groundwater samples studied and the calculated ages of these samples.  
1607 |

| Sample-ID | Tritium content (T.U.) | Possible ages (years) |
|-----------|------------------------|-----------------------|
| g1        | not measured           | not clear             |
| g2        | not measured           | not clear             |
| g3        | not measured           | not clear             |
| g4        | 7.25                   | 20-40                 |
| g5        | 9.97                   | 13-33                 |
| g6        | 22.91                  | 0-20                  |
| g7        | not measured           | not clear             |
| g8        | 19.61                  | 0-20                  |
| g9        | 24.34                  | 0-17                  |
| g10       | 18.68                  | 0-22                  |
| g11       | 1.86                   | 40-65                 |

1608 |

- 带格式的... [1012]
- 带格式的... [1015]
- 带格式的... [1017]
- 带格式的... [1019]
- 带格式的... [1021]
- 带格式的... [1023]
- 带格式的... [1025]
- 带格式的... [1027]
- 带格式的... [1029]
- 带格式的... [1013]
- 带格式的... [1014]
- 带格式的: 字体颜色: 自动设置
- 带格式的... [1016]
- 带格式的... [1018]
- 带格式的... [1020]
- 带格式的... [1022]
- 带格式的... [1024]
- 带格式的... [1026]
- 带格式的... [1028]
- 带格式的... [1030]
- 带格式的... [1031]
- 带格式的... [1032]
- 带格式的: 字体颜色: 自动设置
- 带格式的... [1033]
- 带格式的... [1034]
- 带格式的... [1035]
- 带格式的... [1036]
- 带格式的... [1037]
- 带格式的... [1038]
- 带格式的... [1039]
- 带格式的... [1040]
- 带格式的... [1041]
- 带格式的... [1042]
- 带格式的: 字体颜色: 自动设置
- 带格式的... [1043]
- 带格式的... [1044]
- 带格式的... [1045]
- 带格式的... [1046]
- 带格式的... [1047]
- 带格式的... [1048]
- 带格式的... [1049]
- 带格式的... [1050]
- 带格式的... [1051]
- 带格式的... [1052]



|                |      |                    |
|----------------|------|--------------------|
| 页 14: [1] 带格式的 | User | 2018/6/30 17:02:00 |
|----------------|------|--------------------|

无下划线, 字体颜色: 自动设置

|                |      |                    |
|----------------|------|--------------------|
| 页 14: [2] 带格式的 | User | 2018/6/30 17:02:00 |
|----------------|------|--------------------|

无下划线, 字体颜色: 自动设置

|                |      |                    |
|----------------|------|--------------------|
| 页 14: [3] 带格式的 | User | 2018/6/30 17:02:00 |
|----------------|------|--------------------|

无下划线, 字体颜色: 自动设置

|                |      |                    |
|----------------|------|--------------------|
| 页 14: [4] 带格式的 | User | 2018/6/30 17:02:00 |
|----------------|------|--------------------|

无下划线, 字体颜色: 自动设置

|                |      |                    |
|----------------|------|--------------------|
| 页 62: [5] 带格式的 | User | 2018/6/30 17:02:00 |
|----------------|------|--------------------|

无下划线, 字体颜色: 自动设置

|                |      |                    |
|----------------|------|--------------------|
| 页 62: [6] 带格式的 | User | 2018/6/30 17:02:00 |
|----------------|------|--------------------|

无下划线, 字体颜色: 自动设置

|                |      |                    |
|----------------|------|--------------------|
| 页 62: [7] 带格式的 | User | 2018/6/30 17:02:00 |
|----------------|------|--------------------|

无下划线, 字体颜色: 自动设置

|                |      |                    |
|----------------|------|--------------------|
| 页 62: [8] 带格式的 | User | 2018/6/30 17:15:00 |
|----------------|------|--------------------|

定义网格后不调整右缩进, 不对齐到网格

|                |      |                    |
|----------------|------|--------------------|
| 页 62: [9] 带格式的 | User | 2018/6/30 17:02:00 |
|----------------|------|--------------------|

无下划线, 字体颜色: 自动设置

|                 |      |                    |
|-----------------|------|--------------------|
| 页 62: [10] 带格式的 | User | 2018/6/30 17:02:00 |
|-----------------|------|--------------------|

无下划线, 字体颜色: 自动设置

|                 |      |                    |
|-----------------|------|--------------------|
| 页 62: [11] 带格式的 | User | 2018/6/30 17:02:00 |
|-----------------|------|--------------------|

无下划线, 字体颜色: 自动设置

|                 |      |                    |
|-----------------|------|--------------------|
| 页 62: [12] 带格式的 | User | 2018/6/30 17:02:00 |
|-----------------|------|--------------------|

无下划线, 字体颜色: 自动设置

|                 |      |                    |
|-----------------|------|--------------------|
| 页 62: [13] 带格式的 | User | 2018/6/30 17:02:00 |
|-----------------|------|--------------------|

无下划线, 字体颜色: 自动设置

|                 |      |                    |
|-----------------|------|--------------------|
| 页 62: [14] 带格式的 | User | 2018/6/30 17:02:00 |
|-----------------|------|--------------------|

无下划线, 字体颜色: 自动设置

|                 |      |                    |
|-----------------|------|--------------------|
| 页 62: [15] 带格式的 | User | 2018/6/30 17:02:00 |
|-----------------|------|--------------------|

无下划线, 字体颜色: 自动设置

|                 |      |                    |
|-----------------|------|--------------------|
| 页 62: [16] 带格式的 | User | 2018/6/30 17:02:00 |
|-----------------|------|--------------------|

无下划线, 字体颜色: 自动设置

|                 |      |                    |
|-----------------|------|--------------------|
| 页 62: [17] 带格式的 | User | 2018/6/30 17:02:00 |
|-----------------|------|--------------------|

无下划线, 字体颜色: 自动设置

|                 |      |                    |
|-----------------|------|--------------------|
| 页 62: [18] 带格式的 | User | 2018/6/30 17:02:00 |
|-----------------|------|--------------------|

无下划线, 字体颜色: 自动设置

|                 |      |                    |
|-----------------|------|--------------------|
| 页 62: [19] 带格式的 | User | 2018/6/30 17:02:00 |
|-----------------|------|--------------------|

无下划线, 字体颜色: 自动设置

|                 |      |                    |
|-----------------|------|--------------------|
| 页 62: [20] 带格式的 | User | 2018/6/30 17:02:00 |
|-----------------|------|--------------------|

无下划线, 字体颜色: 自动设置

|                 |      |                    |
|-----------------|------|--------------------|
| 页 62: [21] 带格式的 | User | 2018/6/30 17:02:00 |
|-----------------|------|--------------------|

无下划线, 字体颜色: 自动设置

|                 |      |                    |
|-----------------|------|--------------------|
| 页 62: [22] 带格式的 | User | 2018/6/30 17:02:00 |
|-----------------|------|--------------------|

无下划线, 字体颜色: 自动设置

|                 |      |                    |
|-----------------|------|--------------------|
| 页 62: [23] 带格式的 | User | 2018/6/30 17:15:00 |
|-----------------|------|--------------------|

定义网格后不调整右缩进, 不对齐到网格

|                 |      |                    |
|-----------------|------|--------------------|
| 页 62: [24] 带格式的 | User | 2018/6/30 17:02:00 |
|-----------------|------|--------------------|

无下划线, 字体颜色: 自动设置

|                 |      |                    |
|-----------------|------|--------------------|
| 页 62: [25] 带格式的 | User | 2018/6/30 17:02:00 |
|-----------------|------|--------------------|

无下划线, 字体颜色: 自动设置

|                 |      |                    |
|-----------------|------|--------------------|
| 页 62: [26] 带格式的 | User | 2018/6/30 17:02:00 |
|-----------------|------|--------------------|

无下划线, 字体颜色: 自动设置

|                 |      |                    |
|-----------------|------|--------------------|
| 页 62: [27] 带格式的 | User | 2018/6/30 17:02:00 |
|-----------------|------|--------------------|

无下划线, 字体颜色: 自动设置

|                 |      |                    |
|-----------------|------|--------------------|
| 页 62: [28] 带格式的 | User | 2018/6/30 17:02:00 |
|-----------------|------|--------------------|

无下划线, 字体颜色: 自动设置

|                 |      |                    |
|-----------------|------|--------------------|
| 页 62: [29] 带格式的 | User | 2018/6/30 17:02:00 |
|-----------------|------|--------------------|

无下划线, 字体颜色: 自动设置

|                 |      |                    |
|-----------------|------|--------------------|
| 页 62: [30] 带格式的 | User | 2018/6/30 17:02:00 |
|-----------------|------|--------------------|

无下划线, 字体颜色: 自动设置

|                 |      |                    |
|-----------------|------|--------------------|
| 页 62: [31] 带格式的 | User | 2018/6/30 17:02:00 |
|-----------------|------|--------------------|

无下划线, 字体颜色: 自动设置

|                 |      |                    |
|-----------------|------|--------------------|
| 页 62: [32] 带格式的 | User | 2018/6/30 17:02:00 |
|-----------------|------|--------------------|

无下划线, 字体颜色: 自动设置

|                 |      |                    |
|-----------------|------|--------------------|
| 页 62: [33] 带格式的 | User | 2018/6/30 17:02:00 |
|-----------------|------|--------------------|

无下划线, 字体颜色: 自动设置

|                 |      |                    |
|-----------------|------|--------------------|
| 页 62: [34] 带格式的 | User | 2018/6/30 17:02:00 |
|-----------------|------|--------------------|

无下划线, 字体颜色: 自动设置

|                 |      |                    |
|-----------------|------|--------------------|
| 页 62: [35] 带格式的 | User | 2018/6/30 17:02:00 |
|-----------------|------|--------------------|

无下划线, 字体颜色: 自动设置

|                 |      |                    |
|-----------------|------|--------------------|
| 页 62: [36] 带格式的 | User | 2018/6/30 17:02:00 |
|-----------------|------|--------------------|

无下划线, 字体颜色: 自动设置

|                 |      |                    |
|-----------------|------|--------------------|
| 页 62: [37] 带格式的 | User | 2018/6/30 17:02:00 |
|-----------------|------|--------------------|

无下划线, 字体颜色: 自动设置

|                 |      |                    |
|-----------------|------|--------------------|
| 页 62: [38] 带格式的 | User | 2018/6/30 17:15:00 |
|-----------------|------|--------------------|

定义网格后不调整右缩进, 不对齐到网格

|                 |      |                    |
|-----------------|------|--------------------|
| 页 62: [39] 带格式的 | User | 2018/6/30 17:02:00 |
|-----------------|------|--------------------|

无下划线, 字体颜色: 自动设置

|                 |      |                    |
|-----------------|------|--------------------|
| 页 62: [40] 带格式的 | User | 2018/6/30 17:02:00 |
|-----------------|------|--------------------|

无下划线, 字体颜色: 自动设置

|                 |      |                    |
|-----------------|------|--------------------|
| 页 62: [41] 带格式的 | User | 2018/6/30 17:02:00 |
|-----------------|------|--------------------|

无下划线, 字体颜色: 自动设置

|                 |      |                    |
|-----------------|------|--------------------|
| 页 62: [42] 带格式的 | User | 2018/6/30 17:02:00 |
|-----------------|------|--------------------|

无下划线, 字体颜色: 自动设置

|                 |      |                    |
|-----------------|------|--------------------|
| 页 62: [43] 带格式的 | User | 2018/6/30 17:02:00 |
|-----------------|------|--------------------|

无下划线, 字体颜色: 自动设置

|                 |      |                    |
|-----------------|------|--------------------|
| 页 62: [44] 带格式的 | User | 2018/6/30 17:02:00 |
|-----------------|------|--------------------|

无下划线, 字体颜色: 自动设置

|                 |      |                    |
|-----------------|------|--------------------|
| 页 62: [45] 带格式的 | User | 2018/6/30 17:02:00 |
|-----------------|------|--------------------|

无下划线, 字体颜色: 自动设置

|                 |      |                    |
|-----------------|------|--------------------|
| 页 62: [46] 带格式的 | User | 2018/6/30 17:02:00 |
|-----------------|------|--------------------|

无下划线, 字体颜色: 自动设置

|                 |      |                    |
|-----------------|------|--------------------|
| 页 62: [47] 带格式的 | User | 2018/6/30 17:02:00 |
|-----------------|------|--------------------|

无下划线, 字体颜色: 自动设置

|                 |      |                    |
|-----------------|------|--------------------|
| 页 62: [48] 带格式的 | User | 2018/6/30 17:02:00 |
|-----------------|------|--------------------|

无下划线, 字体颜色: 自动设置

|                 |      |                    |
|-----------------|------|--------------------|
| 页 62: [49] 带格式的 | User | 2018/6/30 17:02:00 |
|-----------------|------|--------------------|

无下划线, 字体颜色: 自动设置

|                 |      |                    |
|-----------------|------|--------------------|
| 页 62: [50] 带格式的 | User | 2018/6/30 17:02:00 |
|-----------------|------|--------------------|

无下划线, 字体颜色: 自动设置

|                 |      |                    |
|-----------------|------|--------------------|
| 页 62: [51] 带格式的 | User | 2018/6/30 17:02:00 |
|-----------------|------|--------------------|

无下划线, 字体颜色: 自动设置

|                 |      |                    |
|-----------------|------|--------------------|
| 页 62: [52] 带格式的 | User | 2018/6/30 17:02:00 |
|-----------------|------|--------------------|

无下划线, 字体颜色: 自动设置

|                 |      |                    |
|-----------------|------|--------------------|
| 页 62: [53] 带格式的 | User | 2018/6/30 17:15:00 |
|-----------------|------|--------------------|

定义网格后不调整右缩进, 不对齐到网格

|                 |      |                    |
|-----------------|------|--------------------|
| 页 62: [54] 带格式的 | User | 2018/6/30 17:02:00 |
|-----------------|------|--------------------|

无下划线, 字体颜色: 自动设置

|                 |      |                    |
|-----------------|------|--------------------|
| 页 62: [55] 带格式的 | User | 2018/6/30 17:02:00 |
|-----------------|------|--------------------|

无下划线, 字体颜色: 自动设置

|                 |      |                    |
|-----------------|------|--------------------|
| 页 62: [56] 带格式的 | User | 2018/6/30 17:02:00 |
|-----------------|------|--------------------|

无下划线, 字体颜色: 自动设置

|                 |      |                    |
|-----------------|------|--------------------|
| 页 62: [57] 带格式的 | User | 2018/6/30 17:02:00 |
|-----------------|------|--------------------|

无下划线, 字体颜色: 自动设置

|                 |      |                    |
|-----------------|------|--------------------|
| 页 62: [58] 带格式的 | User | 2018/6/30 17:02:00 |
|-----------------|------|--------------------|

无下划线, 字体颜色: 自动设置

|                 |      |                    |
|-----------------|------|--------------------|
| 页 62: [59] 带格式的 | User | 2018/6/30 17:02:00 |
|-----------------|------|--------------------|

无下划线, 字体颜色: 自动设置

|                 |      |                    |
|-----------------|------|--------------------|
| 页 62: [60] 带格式的 | User | 2018/6/30 17:02:00 |
|-----------------|------|--------------------|

无下划线, 字体颜色: 自动设置

|                 |      |                    |
|-----------------|------|--------------------|
| 页 62: [61] 带格式的 | User | 2018/6/30 17:02:00 |
|-----------------|------|--------------------|

无下划线, 字体颜色: 自动设置

|                 |      |                    |
|-----------------|------|--------------------|
| 页 62: [62] 带格式的 | User | 2018/6/30 17:02:00 |
|-----------------|------|--------------------|

无下划线, 字体颜色: 自动设置

|                 |      |                    |
|-----------------|------|--------------------|
| 页 62: [63] 带格式的 | User | 2018/6/30 17:02:00 |
|-----------------|------|--------------------|

无下划线, 字体颜色: 自动设置

|                 |      |                    |
|-----------------|------|--------------------|
| 页 62: [64] 带格式的 | User | 2018/6/30 17:02:00 |
|-----------------|------|--------------------|

无下划线, 字体颜色: 自动设置

|                 |      |                    |
|-----------------|------|--------------------|
| 页 62: [65] 带格式的 | User | 2018/6/30 17:02:00 |
|-----------------|------|--------------------|

无下划线, 字体颜色: 自动设置

|                 |      |                    |
|-----------------|------|--------------------|
| 页 62: [66] 带格式的 | User | 2018/6/30 17:02:00 |
|-----------------|------|--------------------|

无下划线, 字体颜色: 自动设置

|                 |      |                    |
|-----------------|------|--------------------|
| 页 62: [67] 带格式的 | User | 2018/6/30 17:02:00 |
|-----------------|------|--------------------|

无下划线, 字体颜色: 自动设置

|                 |      |                    |
|-----------------|------|--------------------|
| 页 62: [68] 带格式的 | User | 2018/6/30 17:15:00 |
|-----------------|------|--------------------|

定义网格后不调整右缩进, 不对齐到网格

|                 |      |                    |
|-----------------|------|--------------------|
| 页 62: [69] 带格式的 | User | 2018/6/30 17:02:00 |
|-----------------|------|--------------------|

无下划线, 字体颜色: 自动设置

|                 |      |                    |
|-----------------|------|--------------------|
| 页 62: [70] 带格式的 | User | 2018/6/30 17:02:00 |
|-----------------|------|--------------------|

无下划线, 字体颜色: 自动设置

|                 |      |                    |
|-----------------|------|--------------------|
| 页 62: [71] 带格式的 | User | 2018/6/30 17:02:00 |
|-----------------|------|--------------------|

无下划线, 字体颜色: 自动设置

|                 |      |                    |
|-----------------|------|--------------------|
| 页 62: [72] 带格式的 | User | 2018/6/30 17:02:00 |
|-----------------|------|--------------------|

无下划线, 字体颜色: 自动设置

|                 |      |                    |
|-----------------|------|--------------------|
| 页 62: [73] 带格式的 | User | 2018/6/30 17:02:00 |
|-----------------|------|--------------------|

无下划线, 字体颜色: 自动设置

|                 |      |                    |
|-----------------|------|--------------------|
| 页 62: [74] 带格式的 | User | 2018/6/30 17:02:00 |
|-----------------|------|--------------------|

无下划线, 字体颜色: 自动设置

|                 |      |                    |
|-----------------|------|--------------------|
| 页 62: [75] 带格式的 | User | 2018/6/30 17:02:00 |
|-----------------|------|--------------------|

无下划线, 字体颜色: 自动设置

|                 |      |                    |
|-----------------|------|--------------------|
| 页 62: [76] 带格式的 | User | 2018/6/30 17:02:00 |
|-----------------|------|--------------------|

无下划线, 字体颜色: 自动设置

|                 |      |                    |
|-----------------|------|--------------------|
| 页 62: [77] 带格式的 | User | 2018/6/30 17:02:00 |
|-----------------|------|--------------------|

无下划线, 字体颜色: 自动设置

|                 |      |                    |
|-----------------|------|--------------------|
| 页 62: [78] 带格式的 | User | 2018/6/30 17:02:00 |
|-----------------|------|--------------------|

无下划线, 字体颜色: 自动设置

|                 |      |                    |
|-----------------|------|--------------------|
| 页 62: [79] 带格式的 | User | 2018/6/30 17:02:00 |
|-----------------|------|--------------------|

无下划线, 字体颜色: 自动设置

|                 |      |                    |
|-----------------|------|--------------------|
| 页 62: [80] 带格式的 | User | 2018/6/30 17:02:00 |
|-----------------|------|--------------------|

无下划线, 字体颜色: 自动设置

|                 |      |                    |
|-----------------|------|--------------------|
| 页 62: [81] 带格式的 | User | 2018/6/30 17:02:00 |
|-----------------|------|--------------------|

无下划线, 字体颜色: 自动设置

|                 |      |                    |
|-----------------|------|--------------------|
| 页 62: [82] 带格式的 | User | 2018/6/30 17:02:00 |
|-----------------|------|--------------------|

无下划线, 字体颜色: 自动设置

|                 |      |                    |
|-----------------|------|--------------------|
| 页 62: [83] 带格式的 | User | 2018/6/30 17:15:00 |
|-----------------|------|--------------------|

定义网格后不调整右缩进, 不对齐到网格

|                 |      |                    |
|-----------------|------|--------------------|
| 页 62: [84] 带格式的 | User | 2018/6/30 17:02:00 |
|-----------------|------|--------------------|

无下划线, 字体颜色: 自动设置

|                 |      |                    |
|-----------------|------|--------------------|
| 页 62: [85] 带格式的 | User | 2018/6/30 17:02:00 |
|-----------------|------|--------------------|

无下划线, 字体颜色: 自动设置

|                 |      |                    |
|-----------------|------|--------------------|
| 页 62: [86] 带格式的 | User | 2018/6/30 17:02:00 |
|-----------------|------|--------------------|

无下划线, 字体颜色: 自动设置

|                 |      |                    |
|-----------------|------|--------------------|
| 页 62: [87] 带格式的 | User | 2018/6/30 17:02:00 |
|-----------------|------|--------------------|

无下划线, 字体颜色: 自动设置

|                 |      |                    |
|-----------------|------|--------------------|
| 页 62: [88] 带格式的 | User | 2018/6/30 17:02:00 |
|-----------------|------|--------------------|

无下划线, 字体颜色: 自动设置

|                 |      |                    |
|-----------------|------|--------------------|
| 页 62: [89] 带格式的 | User | 2018/6/30 17:02:00 |
|-----------------|------|--------------------|

无下划线, 字体颜色: 自动设置

|                 |      |                    |
|-----------------|------|--------------------|
| 页 62: [90] 带格式的 | User | 2018/6/30 17:02:00 |
|-----------------|------|--------------------|

无下划线, 字体颜色: 自动设置

|                 |      |                    |
|-----------------|------|--------------------|
| 页 62: [91] 带格式的 | User | 2018/6/30 17:02:00 |
|-----------------|------|--------------------|

无下划线, 字体颜色: 自动设置

|                 |      |                    |
|-----------------|------|--------------------|
| 页 62: [92] 带格式的 | User | 2018/6/30 17:02:00 |
|-----------------|------|--------------------|

无下划线, 字体颜色: 自动设置

|                 |      |                    |
|-----------------|------|--------------------|
| 页 62: [93] 带格式的 | User | 2018/6/30 17:02:00 |
|-----------------|------|--------------------|

无下划线, 字体颜色: 自动设置

|                 |      |                    |
|-----------------|------|--------------------|
| 页 62: [94] 带格式的 | User | 2018/6/30 17:02:00 |
|-----------------|------|--------------------|



无下划线, 字体颜色: 自动设置

|                 |      |                    |
|-----------------|------|--------------------|
| 页 62: [95] 带格式的 | User | 2018/6/30 17:02:00 |
|-----------------|------|--------------------|

无下划线, 字体颜色: 自动设置

|                 |      |                    |
|-----------------|------|--------------------|
| 页 62: [96] 带格式的 | User | 2018/6/30 17:02:00 |
|-----------------|------|--------------------|

无下划线, 字体颜色: 自动设置

|                 |      |                    |
|-----------------|------|--------------------|
| 页 62: [97] 带格式的 | User | 2018/6/30 17:02:00 |
|-----------------|------|--------------------|

无下划线, 字体颜色: 自动设置

|                 |      |                    |
|-----------------|------|--------------------|
| 页 62: [98] 带格式的 | User | 2018/6/30 17:15:00 |
|-----------------|------|--------------------|

定义网格后不调整右缩进, 不对齐到网格

|                 |      |                    |
|-----------------|------|--------------------|
| 页 62: [99] 带格式的 | User | 2018/6/30 17:02:00 |
|-----------------|------|--------------------|

无下划线, 字体颜色: 自动设置

|                  |      |                    |
|------------------|------|--------------------|
| 页 62: [100] 带格式的 | User | 2018/6/30 17:02:00 |
|------------------|------|--------------------|

无下划线, 字体颜色: 自动设置

|                  |      |                    |
|------------------|------|--------------------|
| 页 62: [101] 带格式的 | User | 2018/6/30 17:02:00 |
|------------------|------|--------------------|

无下划线, 字体颜色: 自动设置

|                  |      |                    |
|------------------|------|--------------------|
| 页 62: [102] 带格式的 | User | 2018/6/30 17:02:00 |
|------------------|------|--------------------|

无下划线, 字体颜色: 自动设置

|                  |      |                    |
|------------------|------|--------------------|
| 页 62: [103] 带格式的 | User | 2018/6/30 17:02:00 |
|------------------|------|--------------------|

无下划线, 字体颜色: 自动设置

|                  |      |                    |
|------------------|------|--------------------|
| 页 62: [104] 带格式的 | User | 2018/6/30 17:02:00 |
|------------------|------|--------------------|

无下划线, 字体颜色: 自动设置

|                  |      |                    |
|------------------|------|--------------------|
| 页 62: [105] 带格式的 | User | 2018/6/30 17:02:00 |
|------------------|------|--------------------|

无下划线, 字体颜色: 自动设置

|                  |      |                    |
|------------------|------|--------------------|
| 页 62: [106] 带格式的 | User | 2018/6/30 17:02:00 |
|------------------|------|--------------------|

无下划线, 字体颜色: 自动设置

|                  |      |                    |
|------------------|------|--------------------|
| 页 62: [107] 带格式的 | User | 2018/6/30 17:02:00 |
|------------------|------|--------------------|

无下划线, 字体颜色: 自动设置

|                  |      |                    |
|------------------|------|--------------------|
| 页 62: [108] 带格式的 | User | 2018/6/30 17:02:00 |
|------------------|------|--------------------|

无下划线, 字体颜色: 自动设置

|                  |      |                    |
|------------------|------|--------------------|
| 页 62: [109] 带格式的 | User | 2018/6/30 17:02:00 |
|------------------|------|--------------------|

无下划线, 字体颜色: 自动设置

|                  |      |                    |
|------------------|------|--------------------|
| 页 62: [110] 带格式的 | User | 2018/6/30 17:02:00 |
|------------------|------|--------------------|

无下划线, 字体颜色: 自动设置

|                  |      |                    |
|------------------|------|--------------------|
| 页 62: [111] 带格式的 | User | 2018/6/30 17:02:00 |
|------------------|------|--------------------|

无下划线, 字体颜色: 自动设置

|                  |      |                    |
|------------------|------|--------------------|
| 页 62: [112] 带格式的 | User | 2018/6/30 17:02:00 |
|------------------|------|--------------------|

无下划线, 字体颜色: 自动设置

|                  |      |                    |
|------------------|------|--------------------|
| 页 62: [113] 带格式的 | User | 2018/6/30 17:15:00 |
|------------------|------|--------------------|

定义网格后不调整右缩进, 不对齐到网格

|                  |      |                    |
|------------------|------|--------------------|
| 页 62: [114] 带格式的 | User | 2018/6/30 17:02:00 |
|------------------|------|--------------------|

无下划线, 字体颜色: 自动设置

|                  |      |                    |
|------------------|------|--------------------|
| 页 62: [115] 带格式的 | User | 2018/6/30 17:02:00 |
|------------------|------|--------------------|

无下划线, 字体颜色: 自动设置

|                  |      |                    |
|------------------|------|--------------------|
| 页 62: [116] 带格式的 | User | 2018/6/30 17:02:00 |
|------------------|------|--------------------|

无下划线, 字体颜色: 自动设置

|                  |      |                    |
|------------------|------|--------------------|
| 页 62: [117] 带格式的 | User | 2018/6/30 17:02:00 |
|------------------|------|--------------------|

无下划线, 字体颜色: 自动设置

|                  |      |                    |
|------------------|------|--------------------|
| 页 62: [118] 带格式的 | User | 2018/6/30 17:02:00 |
|------------------|------|--------------------|

无下划线, 字体颜色: 自动设置

|                  |      |                    |
|------------------|------|--------------------|
| 页 62: [119] 带格式的 | User | 2018/6/30 17:02:00 |
|------------------|------|--------------------|

无下划线, 字体颜色: 自动设置

|                  |      |                    |
|------------------|------|--------------------|
| 页 62: [120] 带格式的 | User | 2018/6/30 17:02:00 |
|------------------|------|--------------------|

无下划线, 字体颜色: 自动设置

|                  |      |                    |
|------------------|------|--------------------|
| 页 62: [121] 带格式的 | User | 2018/6/30 17:02:00 |
|------------------|------|--------------------|

无下划线, 字体颜色: 自动设置

|                  |      |                    |
|------------------|------|--------------------|
| 页 62: [122] 带格式的 | User | 2018/6/30 17:02:00 |
|------------------|------|--------------------|

无下划线, 字体颜色: 自动设置

|                  |      |                    |
|------------------|------|--------------------|
| 页 62: [123] 带格式的 | User | 2018/6/30 17:02:00 |
|------------------|------|--------------------|

无下划线, 字体颜色: 自动设置

|                  |      |                    |
|------------------|------|--------------------|
| 页 62: [124] 带格式的 | User | 2018/6/30 17:02:00 |
|------------------|------|--------------------|

无下划线, 字体颜色: 自动设置

|                  |      |                    |
|------------------|------|--------------------|
| 页 62: [125] 带格式的 | User | 2018/6/30 17:02:00 |
|------------------|------|--------------------|

无下划线, 字体颜色: 自动设置

|                  |      |                    |
|------------------|------|--------------------|
| 页 62: [126] 带格式的 | User | 2018/6/30 17:02:00 |
|------------------|------|--------------------|

无下划线, 字体颜色: 自动设置

|                  |      |                    |
|------------------|------|--------------------|
| 页 62: [127] 带格式的 | User | 2018/6/30 17:02:00 |
|------------------|------|--------------------|

无下划线, 字体颜色: 自动设置

|                  |      |                    |
|------------------|------|--------------------|
| 页 62: [128] 带格式的 | User | 2018/6/30 17:15:00 |
|------------------|------|--------------------|

定义网格后不调整右缩进, 不对齐到网格

|                  |      |                    |
|------------------|------|--------------------|
| 页 62: [129] 带格式的 | User | 2018/6/30 17:02:00 |
|------------------|------|--------------------|

无下划线, 字体颜色: 自动设置

|                  |      |                    |
|------------------|------|--------------------|
| 页 62: [130] 带格式的 | User | 2018/6/30 17:02:00 |
|------------------|------|--------------------|

无下划线, 字体颜色: 自动设置

|                  |      |                    |
|------------------|------|--------------------|
| 页 62: [131] 带格式的 | User | 2018/6/30 17:02:00 |
|------------------|------|--------------------|

无下划线, 字体颜色: 自动设置

|                  |      |                    |
|------------------|------|--------------------|
| 页 62: [132] 带格式的 | User | 2018/6/30 17:02:00 |
|------------------|------|--------------------|

无下划线, 字体颜色: 自动设置

|                  |      |                    |
|------------------|------|--------------------|
| 页 62: [133] 带格式的 | User | 2018/6/30 17:02:00 |
|------------------|------|--------------------|

无下划线, 字体颜色: 自动设置

|                  |      |                    |
|------------------|------|--------------------|
| 页 62: [134] 带格式的 | User | 2018/6/30 17:02:00 |
|------------------|------|--------------------|

无下划线, 字体颜色: 自动设置

|                  |      |                    |
|------------------|------|--------------------|
| 页 62: [135] 带格式的 | User | 2018/6/30 17:02:00 |
|------------------|------|--------------------|

无下划线, 字体颜色: 自动设置

|                  |      |                    |
|------------------|------|--------------------|
| 页 62: [136] 带格式的 | User | 2018/6/30 17:02:00 |
|------------------|------|--------------------|

无下划线, 字体颜色: 自动设置

|                  |      |                    |
|------------------|------|--------------------|
| 页 62: [137] 带格式的 | User | 2018/6/30 17:02:00 |
|------------------|------|--------------------|

无下划线, 字体颜色: 自动设置

|                  |      |                    |
|------------------|------|--------------------|
| 页 62: [138] 带格式的 | User | 2018/6/30 17:02:00 |
|------------------|------|--------------------|

无下划线, 字体颜色: 自动设置

|                  |      |                    |
|------------------|------|--------------------|
| 页 62: [139] 带格式的 | User | 2018/6/30 17:02:00 |
|------------------|------|--------------------|

无下划线, 字体颜色: 自动设置

|                  |      |                    |
|------------------|------|--------------------|
| 页 62: [140] 带格式的 | User | 2018/6/30 17:02:00 |
|------------------|------|--------------------|

无下划线, 字体颜色: 自动设置

|                  |      |                    |
|------------------|------|--------------------|
| 页 62: [141] 带格式的 | User | 2018/6/30 17:02:00 |
|------------------|------|--------------------|

无下划线, 字体颜色: 自动设置

|                  |      |                    |
|------------------|------|--------------------|
| 页 62: [142] 带格式的 | User | 2018/6/30 17:02:00 |
|------------------|------|--------------------|

无下划线, 字体颜色: 自动设置

|                  |      |                    |
|------------------|------|--------------------|
| 页 62: [143] 带格式的 | User | 2018/6/30 17:15:00 |
|------------------|------|--------------------|

定义网格后不调整右缩进, 不对齐到网格

|                  |      |                    |
|------------------|------|--------------------|
| 页 62: [144] 带格式的 | User | 2018/6/30 17:02:00 |
|------------------|------|--------------------|

无下划线, 字体颜色: 自动设置

|                  |      |                    |
|------------------|------|--------------------|
| 页 62: [145] 带格式的 | User | 2018/6/30 17:02:00 |
|------------------|------|--------------------|

无下划线, 字体颜色: 自动设置

|                  |      |                    |
|------------------|------|--------------------|
| 页 62: [146] 带格式的 | User | 2018/6/30 17:02:00 |
|------------------|------|--------------------|

无下划线, 字体颜色: 自动设置

|                  |      |                    |
|------------------|------|--------------------|
| 页 62: [147] 带格式的 | User | 2018/6/30 17:02:00 |
|------------------|------|--------------------|

无下划线, 字体颜色: 自动设置

|                  |      |                    |
|------------------|------|--------------------|
| 页 62: [148] 带格式的 | User | 2018/6/30 17:02:00 |
|------------------|------|--------------------|

无下划线, 字体颜色: 自动设置

|                  |      |                    |
|------------------|------|--------------------|
| 页 62: [149] 带格式的 | User | 2018/6/30 17:02:00 |
|------------------|------|--------------------|

无下划线, 字体颜色: 自动设置

|                  |      |                    |
|------------------|------|--------------------|
| 页 62: [150] 带格式的 | User | 2018/6/30 17:02:00 |
|------------------|------|--------------------|

无下划线, 字体颜色: 自动设置

|                  |      |                    |
|------------------|------|--------------------|
| 页 62: [151] 带格式的 | User | 2018/6/30 17:02:00 |
|------------------|------|--------------------|

无下划线, 字体颜色: 自动设置

|                  |      |                    |
|------------------|------|--------------------|
| 页 62: [152] 带格式的 | User | 2018/6/30 17:02:00 |
|------------------|------|--------------------|

无下划线, 字体颜色: 自动设置

|                  |      |                    |
|------------------|------|--------------------|
| 页 62: [153] 带格式的 | User | 2018/6/30 17:02:00 |
|------------------|------|--------------------|

无下划线, 字体颜色: 自动设置

|                  |      |                    |
|------------------|------|--------------------|
| 页 62: [154] 带格式的 | User | 2018/6/30 17:02:00 |
|------------------|------|--------------------|

无下划线, 字体颜色: 自动设置

|                  |      |                    |
|------------------|------|--------------------|
| 页 62: [155] 带格式的 | User | 2018/6/30 17:02:00 |
|------------------|------|--------------------|

无下划线, 字体颜色: 自动设置

|                  |      |                    |
|------------------|------|--------------------|
| 页 62: [156] 带格式的 | User | 2018/6/30 17:02:00 |
|------------------|------|--------------------|

无下划线, 字体颜色: 自动设置

|                  |      |                    |
|------------------|------|--------------------|
| 页 62: [157] 带格式的 | User | 2018/6/30 17:02:00 |
|------------------|------|--------------------|

无下划线, 字体颜色: 自动设置

|                  |      |                    |
|------------------|------|--------------------|
| 页 62: [158] 带格式的 | User | 2018/6/30 17:15:00 |
|------------------|------|--------------------|

定义网格后不调整右缩进, 不对齐到网格

|                  |      |                    |
|------------------|------|--------------------|
| 页 62: [159] 带格式的 | User | 2018/6/30 17:02:00 |
|------------------|------|--------------------|

无下划线, 字体颜色: 自动设置

|                  |      |                    |
|------------------|------|--------------------|
| 页 62: [160] 带格式的 | User | 2018/6/30 17:02:00 |
|------------------|------|--------------------|

无下划线, 字体颜色: 自动设置

|                  |      |                    |
|------------------|------|--------------------|
| 页 62: [161] 带格式的 | User | 2018/6/30 17:02:00 |
|------------------|------|--------------------|

无下划线, 字体颜色: 自动设置

|                  |      |                    |
|------------------|------|--------------------|
| 页 62: [162] 带格式的 | User | 2018/6/30 17:02:00 |
|------------------|------|--------------------|

无下划线, 字体颜色: 自动设置

|                  |      |                    |
|------------------|------|--------------------|
| 页 62: [163] 带格式的 | User | 2018/6/30 17:02:00 |
|------------------|------|--------------------|

无下划线, 字体颜色: 自动设置

|                  |      |                    |
|------------------|------|--------------------|
| 页 62: [164] 带格式的 | User | 2018/6/30 17:02:00 |
|------------------|------|--------------------|

无下划线, 字体颜色: 自动设置

|                  |      |                    |
|------------------|------|--------------------|
| 页 62: [165] 带格式的 | User | 2018/6/30 17:02:00 |
|------------------|------|--------------------|

无下划线, 字体颜色: 自动设置

|                  |      |                    |
|------------------|------|--------------------|
| 页 62: [166] 带格式的 | User | 2018/6/30 17:02:00 |
|------------------|------|--------------------|

无下划线, 字体颜色: 自动设置

|                  |      |                    |
|------------------|------|--------------------|
| 页 62: [167] 带格式的 | User | 2018/6/30 17:02:00 |
|------------------|------|--------------------|

无下划线, 字体颜色: 自动设置

|                  |      |                    |
|------------------|------|--------------------|
| 页 62: [168] 带格式的 | User | 2018/6/30 17:02:00 |
|------------------|------|--------------------|

无下划线, 字体颜色: 自动设置

|                  |      |                    |
|------------------|------|--------------------|
| 页 62: [169] 带格式的 | User | 2018/6/30 17:02:00 |
|------------------|------|--------------------|

无下划线, 字体颜色: 自动设置

|                  |      |                    |
|------------------|------|--------------------|
| 页 62: [170] 带格式的 | User | 2018/6/30 17:02:00 |
|------------------|------|--------------------|

无下划线, 字体颜色: 自动设置

|                  |      |                    |
|------------------|------|--------------------|
| 页 62: [171] 带格式的 | User | 2018/6/30 17:02:00 |
|------------------|------|--------------------|

无下划线, 字体颜色: 自动设置

|                  |      |                    |
|------------------|------|--------------------|
| 页 62: [172] 带格式的 | User | 2018/6/30 17:02:00 |
|------------------|------|--------------------|

无下划线, 字体颜色: 自动设置

|                  |      |                    |
|------------------|------|--------------------|
| 页 62: [173] 带格式的 | User | 2018/6/30 17:15:00 |
|------------------|------|--------------------|

定义网格后不调整右缩进, 不对齐到网格

|                  |      |                    |
|------------------|------|--------------------|
| 页 62: [174] 带格式的 | User | 2018/6/30 17:02:00 |
|------------------|------|--------------------|

无下划线, 字体颜色: 自动设置

|                  |      |                    |
|------------------|------|--------------------|
| 页 62: [175] 带格式的 | User | 2018/6/30 17:02:00 |
|------------------|------|--------------------|

无下划线, 字体颜色: 自动设置

|                  |      |                    |
|------------------|------|--------------------|
| 页 62: [176] 带格式的 | User | 2018/6/30 17:02:00 |
|------------------|------|--------------------|

无下划线, 字体颜色: 自动设置

|                  |      |                    |
|------------------|------|--------------------|
| 页 62: [177] 带格式的 | User | 2018/6/30 17:02:00 |
|------------------|------|--------------------|

无下划线, 字体颜色: 自动设置

|                  |      |                    |
|------------------|------|--------------------|
| 页 62: [178] 带格式的 | User | 2018/6/30 17:02:00 |
|------------------|------|--------------------|

无下划线, 字体颜色: 自动设置

|                  |      |                    |
|------------------|------|--------------------|
| 页 62: [179] 带格式的 | User | 2018/6/30 17:02:00 |
|------------------|------|--------------------|

无下划线, 字体颜色: 自动设置

|                  |      |                    |
|------------------|------|--------------------|
| 页 62: [180] 带格式的 | User | 2018/6/30 17:02:00 |
|------------------|------|--------------------|

无下划线, 字体颜色: 自动设置

|                  |      |                    |
|------------------|------|--------------------|
| 页 62: [181] 带格式的 | User | 2018/6/30 17:02:00 |
|------------------|------|--------------------|

无下划线, 字体颜色: 自动设置

|                  |      |                    |
|------------------|------|--------------------|
| 页 62: [182] 带格式的 | User | 2018/6/30 17:02:00 |
|------------------|------|--------------------|

无下划线, 字体颜色: 自动设置

|                  |      |                    |
|------------------|------|--------------------|
| 页 62: [183] 带格式的 | User | 2018/6/30 17:02:00 |
|------------------|------|--------------------|

无下划线, 字体颜色: 自动设置

|                  |      |                    |
|------------------|------|--------------------|
| 页 62: [184] 带格式的 | User | 2018/6/30 17:02:00 |
|------------------|------|--------------------|

无下划线, 字体颜色: 自动设置

|                  |      |                    |
|------------------|------|--------------------|
| 页 62: [185] 带格式的 | User | 2018/6/30 17:02:00 |
|------------------|------|--------------------|

无下划线, 字体颜色: 自动设置

|                  |      |                    |
|------------------|------|--------------------|
| 页 62: [186] 带格式的 | User | 2018/6/30 17:02:00 |
|------------------|------|--------------------|

无下划线, 字体颜色: 自动设置

|                  |      |                    |
|------------------|------|--------------------|
| 页 62: [187] 带格式的 | User | 2018/6/30 17:02:00 |
|------------------|------|--------------------|

无下划线, 字体颜色: 自动设置



|                  |      |                    |
|------------------|------|--------------------|
| 页 62: [188] 带格式的 | User | 2018/6/30 17:15:00 |
|------------------|------|--------------------|

定义网格后不调整右缩进, 不对齐到网格

|                  |      |                    |
|------------------|------|--------------------|
| 页 62: [189] 带格式的 | User | 2018/6/30 17:02:00 |
|------------------|------|--------------------|

无下划线, 字体颜色: 自动设置

|                  |      |                    |
|------------------|------|--------------------|
| 页 62: [190] 带格式的 | User | 2018/6/30 17:02:00 |
|------------------|------|--------------------|

无下划线, 字体颜色: 自动设置

|                  |      |                    |
|------------------|------|--------------------|
| 页 62: [191] 带格式的 | User | 2018/6/30 17:02:00 |
|------------------|------|--------------------|

无下划线, 字体颜色: 自动设置

|                  |      |                    |
|------------------|------|--------------------|
| 页 62: [192] 带格式的 | User | 2018/6/30 17:02:00 |
|------------------|------|--------------------|

无下划线, 字体颜色: 自动设置

|                  |      |                    |
|------------------|------|--------------------|
| 页 62: [193] 带格式的 | User | 2018/6/30 17:02:00 |
|------------------|------|--------------------|

无下划线, 字体颜色: 自动设置

|                  |      |                    |
|------------------|------|--------------------|
| 页 62: [194] 带格式的 | User | 2018/6/30 17:02:00 |
|------------------|------|--------------------|

无下划线, 字体颜色: 自动设置

|                  |      |                    |
|------------------|------|--------------------|
| 页 62: [195] 带格式的 | User | 2018/6/30 17:02:00 |
|------------------|------|--------------------|

无下划线, 字体颜色: 自动设置

|                  |      |                    |
|------------------|------|--------------------|
| 页 62: [196] 带格式的 | User | 2018/6/30 17:02:00 |
|------------------|------|--------------------|

无下划线, 字体颜色: 自动设置

|                  |      |                    |
|------------------|------|--------------------|
| 页 62: [197] 带格式的 | User | 2018/6/30 17:02:00 |
|------------------|------|--------------------|

无下划线, 字体颜色: 自动设置

|                  |      |                    |
|------------------|------|--------------------|
| 页 62: [198] 带格式的 | User | 2018/6/30 17:02:00 |
|------------------|------|--------------------|

无下划线, 字体颜色: 自动设置

|                  |      |                    |
|------------------|------|--------------------|
| 页 62: [199] 带格式的 | User | 2018/6/30 17:02:00 |
|------------------|------|--------------------|

无下划线, 字体颜色: 自动设置

|                  |      |                    |
|------------------|------|--------------------|
| 页 62: [200] 带格式的 | User | 2018/6/30 17:02:00 |
|------------------|------|--------------------|

无下划线, 字体颜色: 自动设置

|                  |      |                    |
|------------------|------|--------------------|
| 页 62: [201] 带格式的 | User | 2018/6/30 17:02:00 |
|------------------|------|--------------------|

无下划线, 字体颜色: 自动设置

|                  |      |                    |
|------------------|------|--------------------|
| 页 62: [202] 带格式的 | User | 2018/6/30 17:02:00 |
|------------------|------|--------------------|

无下划线, 字体颜色: 自动设置

|                  |      |                    |
|------------------|------|--------------------|
| 页 62: [203] 带格式的 | User | 2018/6/30 17:15:00 |
|------------------|------|--------------------|

定义网格后不调整右缩进, 不对齐到网格

|                  |      |                    |
|------------------|------|--------------------|
| 页 62: [204] 带格式的 | User | 2018/6/30 17:02:00 |
|------------------|------|--------------------|

无下划线, 字体颜色: 自动设置

|                  |      |                    |
|------------------|------|--------------------|
| 页 62: [205] 带格式的 | User | 2018/6/30 17:02:00 |
|------------------|------|--------------------|

无下划线, 字体颜色: 自动设置

|                  |      |                    |
|------------------|------|--------------------|
| 页 62: [206] 带格式的 | User | 2018/6/30 17:02:00 |
|------------------|------|--------------------|

无下划线, 字体颜色: 自动设置

|                  |      |                    |
|------------------|------|--------------------|
| 页 62: [207] 带格式的 | User | 2018/6/30 17:02:00 |
|------------------|------|--------------------|

无下划线, 字体颜色: 自动设置

|                  |      |                    |
|------------------|------|--------------------|
| 页 62: [208] 带格式的 | User | 2018/6/30 17:02:00 |
|------------------|------|--------------------|

无下划线, 字体颜色: 自动设置

|                  |      |                    |
|------------------|------|--------------------|
| 页 62: [209] 带格式的 | User | 2018/6/30 17:02:00 |
|------------------|------|--------------------|

无下划线, 字体颜色: 自动设置

|                  |      |                    |
|------------------|------|--------------------|
| 页 62: [210] 带格式的 | User | 2018/6/30 17:02:00 |
|------------------|------|--------------------|

无下划线, 字体颜色: 自动设置

|                  |      |                    |
|------------------|------|--------------------|
| 页 62: [211] 带格式的 | User | 2018/6/30 17:02:00 |
|------------------|------|--------------------|

无下划线, 字体颜色: 自动设置

|                  |      |                    |
|------------------|------|--------------------|
| 页 62: [212] 带格式的 | User | 2018/6/30 17:02:00 |
|------------------|------|--------------------|

无下划线, 字体颜色: 自动设置

|                  |      |                    |
|------------------|------|--------------------|
| 页 62: [213] 带格式的 | User | 2018/6/30 17:02:00 |
|------------------|------|--------------------|

无下划线, 字体颜色: 自动设置

|                  |      |                    |
|------------------|------|--------------------|
| 页 62: [214] 带格式的 | User | 2018/6/30 17:02:00 |
|------------------|------|--------------------|

无下划线, 字体颜色: 自动设置

|                  |      |                    |
|------------------|------|--------------------|
| 页 62: [215] 带格式的 | User | 2018/6/30 17:02:00 |
|------------------|------|--------------------|

无下划线, 字体颜色: 自动设置

|                  |      |                    |
|------------------|------|--------------------|
| 页 62: [216] 带格式的 | User | 2018/6/30 17:02:00 |
|------------------|------|--------------------|

无下划线, 字体颜色: 自动设置

|                  |      |                    |
|------------------|------|--------------------|
| 页 62: [217] 带格式的 | User | 2018/6/30 17:02:00 |
|------------------|------|--------------------|

无下划线, 字体颜色: 自动设置

|                  |      |                    |
|------------------|------|--------------------|
| 页 62: [218] 带格式的 | User | 2018/6/30 17:15:00 |
|------------------|------|--------------------|

定义网格后不调整右缩进, 不对齐到网格

|                  |      |                    |
|------------------|------|--------------------|
| 页 62: [219] 带格式的 | User | 2018/6/30 17:02:00 |
|------------------|------|--------------------|

无下划线, 字体颜色: 自动设置

|                  |      |                    |
|------------------|------|--------------------|
| 页 62: [220] 带格式的 | User | 2018/6/30 17:02:00 |
|------------------|------|--------------------|

无下划线, 字体颜色: 自动设置

|                  |      |                    |
|------------------|------|--------------------|
| 页 62: [221] 带格式的 | User | 2018/6/30 17:02:00 |
|------------------|------|--------------------|

无下划线, 字体颜色: 自动设置

|                  |      |                    |
|------------------|------|--------------------|
| 页 62: [222] 带格式的 | User | 2018/6/30 17:02:00 |
|------------------|------|--------------------|

无下划线, 字体颜色: 自动设置

|                  |      |                    |
|------------------|------|--------------------|
| 页 62: [223] 带格式的 | User | 2018/6/30 17:02:00 |
|------------------|------|--------------------|

无下划线, 字体颜色: 自动设置

|                  |      |                    |
|------------------|------|--------------------|
| 页 62: [224] 带格式的 | User | 2018/6/30 17:02:00 |
|------------------|------|--------------------|

无下划线, 字体颜色: 自动设置

|                  |      |                    |
|------------------|------|--------------------|
| 页 62: [225] 带格式的 | User | 2018/6/30 17:02:00 |
|------------------|------|--------------------|

无下划线, 字体颜色: 自动设置

|                  |      |                    |
|------------------|------|--------------------|
| 页 62: [226] 带格式的 | User | 2018/6/30 17:02:00 |
|------------------|------|--------------------|

无下划线, 字体颜色: 自动设置

|                  |      |                    |
|------------------|------|--------------------|
| 页 62: [227] 带格式的 | User | 2018/6/30 17:02:00 |
|------------------|------|--------------------|

无下划线, 字体颜色: 自动设置

|                  |      |                    |
|------------------|------|--------------------|
| 页 62: [228] 带格式的 | User | 2018/6/30 17:02:00 |
|------------------|------|--------------------|

无下划线, 字体颜色: 自动设置

|                  |      |                    |
|------------------|------|--------------------|
| 页 62: [229] 带格式的 | User | 2018/6/30 17:02:00 |
|------------------|------|--------------------|

无下划线, 字体颜色: 自动设置

|                  |      |                    |
|------------------|------|--------------------|
| 页 62: [230] 带格式的 | User | 2018/6/30 17:02:00 |
|------------------|------|--------------------|

无下划线, 字体颜色: 自动设置

|                  |      |                    |
|------------------|------|--------------------|
| 页 62: [231] 带格式的 | User | 2018/6/30 17:02:00 |
|------------------|------|--------------------|

无下划线, 字体颜色: 自动设置

|                  |      |                    |
|------------------|------|--------------------|
| 页 62: [232] 带格式的 | User | 2018/6/30 17:02:00 |
|------------------|------|--------------------|

无下划线, 字体颜色: 自动设置

|                  |      |                    |
|------------------|------|--------------------|
| 页 62: [233] 带格式的 | User | 2018/6/30 17:15:00 |
|------------------|------|--------------------|

定义网格后不调整右缩进, 不对齐到网格

|                  |      |                    |
|------------------|------|--------------------|
| 页 62: [234] 带格式的 | User | 2018/6/30 17:02:00 |
|------------------|------|--------------------|

无下划线, 字体颜色: 自动设置

|                  |      |                    |
|------------------|------|--------------------|
| 页 62: [235] 带格式的 | User | 2018/6/30 17:02:00 |
|------------------|------|--------------------|

无下划线, 字体颜色: 自动设置

|                  |      |                    |
|------------------|------|--------------------|
| 页 62: [236] 带格式的 | User | 2018/6/30 17:02:00 |
|------------------|------|--------------------|

无下划线, 字体颜色: 自动设置

|                  |      |                    |
|------------------|------|--------------------|
| 页 62: [237] 带格式的 | User | 2018/6/30 17:02:00 |
|------------------|------|--------------------|

无下划线, 字体颜色: 自动设置

|                  |      |                    |
|------------------|------|--------------------|
| 页 62: [238] 带格式的 | User | 2018/6/30 17:02:00 |
|------------------|------|--------------------|

无下划线, 字体颜色: 自动设置

|                  |      |                    |
|------------------|------|--------------------|
| 页 62: [239] 带格式的 | User | 2018/6/30 17:02:00 |
|------------------|------|--------------------|

无下划线, 字体颜色: 自动设置

|                  |      |                    |
|------------------|------|--------------------|
| 页 62: [240] 带格式的 | User | 2018/6/30 17:02:00 |
|------------------|------|--------------------|

无下划线, 字体颜色: 自动设置

|                  |      |                    |
|------------------|------|--------------------|
| 页 62: [241] 带格式的 | User | 2018/6/30 17:02:00 |
|------------------|------|--------------------|

无下划线, 字体颜色: 自动设置

|                  |      |                    |
|------------------|------|--------------------|
| 页 62: [242] 带格式的 | User | 2018/6/30 17:02:00 |
|------------------|------|--------------------|

无下划线, 字体颜色: 自动设置

|                  |      |                    |
|------------------|------|--------------------|
| 页 62: [243] 带格式的 | User | 2018/6/30 17:02:00 |
|------------------|------|--------------------|

无下划线, 字体颜色: 自动设置

|                  |      |                    |
|------------------|------|--------------------|
| 页 62: [244] 带格式的 | User | 2018/6/30 17:02:00 |
|------------------|------|--------------------|

无下划线, 字体颜色: 自动设置

|                  |      |                    |
|------------------|------|--------------------|
| 页 62: [245] 带格式的 | User | 2018/6/30 17:02:00 |
|------------------|------|--------------------|

无下划线, 字体颜色: 自动设置

|                  |      |                    |
|------------------|------|--------------------|
| 页 62: [246] 带格式的 | User | 2018/6/30 17:02:00 |
|------------------|------|--------------------|

无下划线, 字体颜色: 自动设置

|                  |      |                    |
|------------------|------|--------------------|
| 页 62: [247] 带格式的 | User | 2018/6/30 17:02:00 |
|------------------|------|--------------------|

无下划线, 字体颜色: 自动设置

|                  |      |                    |
|------------------|------|--------------------|
| 页 62: [248] 带格式的 | User | 2018/6/30 17:15:00 |
|------------------|------|--------------------|

定义网格后不调整右缩进, 不对齐到网格

|                  |      |                    |
|------------------|------|--------------------|
| 页 62: [249] 带格式的 | User | 2018/6/30 17:02:00 |
|------------------|------|--------------------|

无下划线, 字体颜色: 自动设置

|                  |      |                    |
|------------------|------|--------------------|
| 页 62: [250] 带格式的 | User | 2018/6/30 17:02:00 |
|------------------|------|--------------------|

无下划线, 字体颜色: 自动设置

|                  |      |                    |
|------------------|------|--------------------|
| 页 62: [251] 带格式的 | User | 2018/6/30 17:02:00 |
|------------------|------|--------------------|

无下划线, 字体颜色: 自动设置

|                  |      |                    |
|------------------|------|--------------------|
| 页 62: [252] 带格式的 | User | 2018/6/30 17:02:00 |
|------------------|------|--------------------|

无下划线, 字体颜色: 自动设置

|                  |      |                    |
|------------------|------|--------------------|
| 页 62: [253] 带格式的 | User | 2018/6/30 17:02:00 |
|------------------|------|--------------------|

无下划线, 字体颜色: 自动设置

|                  |      |                    |
|------------------|------|--------------------|
| 页 62: [254] 带格式的 | User | 2018/6/30 17:02:00 |
|------------------|------|--------------------|

无下划线, 字体颜色: 自动设置

|                  |      |                    |
|------------------|------|--------------------|
| 页 62: [255] 带格式的 | User | 2018/6/30 17:02:00 |
|------------------|------|--------------------|

无下划线, 字体颜色: 自动设置

|                  |      |                    |
|------------------|------|--------------------|
| 页 62: [256] 带格式的 | User | 2018/6/30 17:02:00 |
|------------------|------|--------------------|

无下划线, 字体颜色: 自动设置

|                  |      |                    |
|------------------|------|--------------------|
| 页 62: [257] 带格式的 | User | 2018/6/30 17:02:00 |
|------------------|------|--------------------|

无下划线, 字体颜色: 自动设置

|                  |      |                    |
|------------------|------|--------------------|
| 页 62: [258] 带格式的 | User | 2018/6/30 17:02:00 |
|------------------|------|--------------------|

无下划线, 字体颜色: 自动设置

|                  |      |                    |
|------------------|------|--------------------|
| 页 62: [259] 带格式的 | User | 2018/6/30 17:02:00 |
|------------------|------|--------------------|

无下划线, 字体颜色: 自动设置

|                  |      |                    |
|------------------|------|--------------------|
| 页 62: [260] 带格式的 | User | 2018/6/30 17:02:00 |
|------------------|------|--------------------|

无下划线, 字体颜色: 自动设置

|                  |      |                    |
|------------------|------|--------------------|
| 页 62: [261] 带格式的 | User | 2018/6/30 17:02:00 |
|------------------|------|--------------------|

无下划线, 字体颜色: 自动设置

|                  |      |                    |
|------------------|------|--------------------|
| 页 62: [262] 带格式的 | User | 2018/6/30 17:02:00 |
|------------------|------|--------------------|

无下划线, 字体颜色: 自动设置

|                  |      |                    |
|------------------|------|--------------------|
| 页 62: [263] 带格式的 | User | 2018/6/30 17:15:00 |
|------------------|------|--------------------|

定义网格后不调整右缩进, 不对齐到网格

|                  |      |                    |
|------------------|------|--------------------|
| 页 62: [264] 带格式的 | User | 2018/6/30 17:02:00 |
|------------------|------|--------------------|

无下划线, 字体颜色: 自动设置

|                  |      |                    |
|------------------|------|--------------------|
| 页 62: [265] 带格式的 | User | 2018/6/30 17:02:00 |
|------------------|------|--------------------|

无下划线, 字体颜色: 自动设置

|                  |      |                    |
|------------------|------|--------------------|
| 页 62: [266] 带格式的 | User | 2018/6/30 17:02:00 |
|------------------|------|--------------------|

无下划线, 字体颜色: 自动设置

|                  |      |                    |
|------------------|------|--------------------|
| 页 62: [267] 带格式的 | User | 2018/6/30 17:02:00 |
|------------------|------|--------------------|

无下划线, 字体颜色: 自动设置

|                  |      |                    |
|------------------|------|--------------------|
| 页 62: [268] 带格式的 | User | 2018/6/30 17:02:00 |
|------------------|------|--------------------|

无下划线, 字体颜色: 自动设置

|                  |      |                    |
|------------------|------|--------------------|
| 页 62: [269] 带格式的 | User | 2018/6/30 17:02:00 |
|------------------|------|--------------------|

无下划线, 字体颜色: 自动设置

|                  |      |                    |
|------------------|------|--------------------|
| 页 62: [270] 带格式的 | User | 2018/6/30 17:02:00 |
|------------------|------|--------------------|

无下划线, 字体颜色: 自动设置

|                  |      |                    |
|------------------|------|--------------------|
| 页 62: [271] 带格式的 | User | 2018/6/30 17:02:00 |
|------------------|------|--------------------|

无下划线, 字体颜色: 自动设置

|                  |      |                    |
|------------------|------|--------------------|
| 页 62: [272] 带格式的 | User | 2018/6/30 17:02:00 |
|------------------|------|--------------------|

无下划线, 字体颜色: 自动设置

|                  |      |                    |
|------------------|------|--------------------|
| 页 62: [273] 带格式的 | User | 2018/6/30 17:02:00 |
|------------------|------|--------------------|

无下划线, 字体颜色: 自动设置

|                  |      |                    |
|------------------|------|--------------------|
| 页 62: [274] 带格式的 | User | 2018/6/30 17:02:00 |
|------------------|------|--------------------|

无下划线, 字体颜色: 自动设置

|                  |      |                    |
|------------------|------|--------------------|
| 页 62: [275] 带格式的 | User | 2018/6/30 17:02:00 |
|------------------|------|--------------------|

无下划线, 字体颜色: 自动设置

|                  |      |                    |
|------------------|------|--------------------|
| 页 62: [276] 带格式的 | User | 2018/6/30 17:02:00 |
|------------------|------|--------------------|

无下划线, 字体颜色: 自动设置

|                  |      |                    |
|------------------|------|--------------------|
| 页 62: [277] 带格式的 | User | 2018/6/30 17:02:00 |
|------------------|------|--------------------|

无下划线, 字体颜色: 自动设置

|                  |      |                    |
|------------------|------|--------------------|
| 页 62: [278] 带格式的 | User | 2018/6/30 17:15:00 |
|------------------|------|--------------------|

定义网格后不调整右缩进, 不对齐到网格

|                  |      |                    |
|------------------|------|--------------------|
| 页 62: [279] 带格式的 | User | 2018/6/30 17:02:00 |
|------------------|------|--------------------|

无下划线, 字体颜色: 自动设置

|                  |      |                    |
|------------------|------|--------------------|
| 页 62: [280] 带格式的 | User | 2018/6/30 17:02:00 |
|------------------|------|--------------------|

无下划线, 字体颜色: 自动设置



|                  |      |                    |
|------------------|------|--------------------|
| 页 62: [281] 带格式的 | User | 2018/6/30 17:02:00 |
|------------------|------|--------------------|

无下划线, 字体颜色: 自动设置

|                  |      |                    |
|------------------|------|--------------------|
| 页 62: [282] 带格式的 | User | 2018/6/30 17:02:00 |
|------------------|------|--------------------|

无下划线, 字体颜色: 自动设置

|                  |      |                    |
|------------------|------|--------------------|
| 页 62: [283] 带格式的 | User | 2018/6/30 17:02:00 |
|------------------|------|--------------------|

无下划线, 字体颜色: 自动设置

|                  |      |                    |
|------------------|------|--------------------|
| 页 62: [284] 带格式的 | User | 2018/6/30 17:02:00 |
|------------------|------|--------------------|

无下划线, 字体颜色: 自动设置

|                  |      |                    |
|------------------|------|--------------------|
| 页 62: [285] 带格式的 | User | 2018/6/30 17:02:00 |
|------------------|------|--------------------|

无下划线, 字体颜色: 自动设置

|                  |      |                    |
|------------------|------|--------------------|
| 页 62: [286] 带格式的 | User | 2018/6/30 17:02:00 |
|------------------|------|--------------------|

无下划线, 字体颜色: 自动设置

|                  |      |                    |
|------------------|------|--------------------|
| 页 62: [287] 带格式的 | User | 2018/6/30 17:02:00 |
|------------------|------|--------------------|

无下划线, 字体颜色: 自动设置

|                  |      |                    |
|------------------|------|--------------------|
| 页 62: [288] 带格式的 | User | 2018/6/30 17:02:00 |
|------------------|------|--------------------|

无下划线, 字体颜色: 自动设置

|                  |      |                    |
|------------------|------|--------------------|
| 页 62: [289] 带格式的 | User | 2018/6/30 17:02:00 |
|------------------|------|--------------------|

无下划线, 字体颜色: 自动设置

|                  |      |                    |
|------------------|------|--------------------|
| 页 62: [290] 带格式的 | User | 2018/6/30 17:02:00 |
|------------------|------|--------------------|

无下划线, 字体颜色: 自动设置

|                  |      |                    |
|------------------|------|--------------------|
| 页 62: [291] 带格式的 | User | 2018/6/30 17:02:00 |
|------------------|------|--------------------|

无下划线, 字体颜色: 自动设置

|                  |      |                    |
|------------------|------|--------------------|
| 页 62: [292] 带格式的 | User | 2018/6/30 17:02:00 |
|------------------|------|--------------------|

无下划线, 字体颜色: 自动设置

|                  |      |                    |
|------------------|------|--------------------|
| 页 62: [293] 带格式的 | User | 2018/6/30 17:15:00 |
|------------------|------|--------------------|

定义网格后不调整右缩进, 不对齐到网格

|                  |      |                    |
|------------------|------|--------------------|
| 页 62: [294] 带格式的 | User | 2018/6/30 17:02:00 |
|------------------|------|--------------------|

无下划线, 字体颜色: 自动设置

|                  |      |                    |
|------------------|------|--------------------|
| 页 62: [295] 带格式的 | User | 2018/6/30 17:02:00 |
|------------------|------|--------------------|

无下划线, 字体颜色: 自动设置

|                  |      |                    |
|------------------|------|--------------------|
| 页 62: [296] 带格式的 | User | 2018/6/30 17:02:00 |
|------------------|------|--------------------|

无下划线, 字体颜色: 自动设置

|                  |      |                    |
|------------------|------|--------------------|
| 页 62: [297] 带格式的 | User | 2018/6/30 17:02:00 |
|------------------|------|--------------------|

无下划线, 字体颜色: 自动设置

|                  |      |                    |
|------------------|------|--------------------|
| 页 62: [298] 带格式的 | User | 2018/6/30 17:02:00 |
|------------------|------|--------------------|

无下划线, 字体颜色: 自动设置

|                  |      |                    |
|------------------|------|--------------------|
| 页 62: [299] 带格式的 | User | 2018/6/30 17:02:00 |
|------------------|------|--------------------|

无下划线, 字体颜色: 自动设置

|                  |      |                    |
|------------------|------|--------------------|
| 页 62: [300] 带格式的 | User | 2018/6/30 17:02:00 |
|------------------|------|--------------------|

无下划线, 字体颜色: 自动设置

|                  |      |                    |
|------------------|------|--------------------|
| 页 62: [301] 带格式的 | User | 2018/6/30 17:02:00 |
|------------------|------|--------------------|

无下划线, 字体颜色: 自动设置

|                  |      |                    |
|------------------|------|--------------------|
| 页 62: [302] 带格式的 | User | 2018/6/30 17:02:00 |
|------------------|------|--------------------|

无下划线, 字体颜色: 自动设置

|                  |      |                    |
|------------------|------|--------------------|
| 页 62: [303] 带格式的 | User | 2018/6/30 17:02:00 |
|------------------|------|--------------------|

无下划线, 字体颜色: 自动设置

|                  |      |                    |
|------------------|------|--------------------|
| 页 62: [304] 带格式的 | User | 2018/6/30 17:02:00 |
|------------------|------|--------------------|

无下划线, 字体颜色: 自动设置

|                  |      |                    |
|------------------|------|--------------------|
| 页 62: [305] 带格式的 | User | 2018/6/30 17:02:00 |
|------------------|------|--------------------|

无下划线, 字体颜色: 自动设置

|                  |      |                    |
|------------------|------|--------------------|
| 页 62: [306] 带格式的 | User | 2018/6/30 17:02:00 |
|------------------|------|--------------------|

无下划线, 字体颜色: 自动设置

|                  |      |                    |
|------------------|------|--------------------|
| 页 62: [307] 带格式的 | User | 2018/6/30 17:02:00 |
|------------------|------|--------------------|

无下划线, 字体颜色: 自动设置

|                  |      |                    |
|------------------|------|--------------------|
| 页 62: [308] 带格式的 | User | 2018/6/30 17:15:00 |
|------------------|------|--------------------|

定义网格后不调整右缩进, 不对齐到网格

|                  |      |                    |
|------------------|------|--------------------|
| 页 62: [309] 带格式的 | User | 2018/6/30 17:02:00 |
|------------------|------|--------------------|

无下划线, 字体颜色: 自动设置

|                  |      |                    |
|------------------|------|--------------------|
| 页 62: [310] 带格式的 | User | 2018/6/30 17:02:00 |
|------------------|------|--------------------|

无下划线, 字体颜色: 自动设置

|                  |      |                    |
|------------------|------|--------------------|
| 页 62: [311] 带格式的 | User | 2018/6/30 17:02:00 |
|------------------|------|--------------------|

无下划线, 字体颜色: 自动设置

|                  |      |                    |
|------------------|------|--------------------|
| 页 62: [312] 带格式的 | User | 2018/6/30 17:02:00 |
|------------------|------|--------------------|

无下划线, 字体颜色: 自动设置

|                  |      |                    |
|------------------|------|--------------------|
| 页 62: [313] 带格式的 | User | 2018/6/30 17:02:00 |
|------------------|------|--------------------|

无下划线, 字体颜色: 自动设置

|                  |      |                    |
|------------------|------|--------------------|
| 页 62: [314] 带格式的 | User | 2018/6/30 17:02:00 |
|------------------|------|--------------------|

无下划线, 字体颜色: 自动设置

|                  |      |                    |
|------------------|------|--------------------|
| 页 62: [315] 带格式的 | User | 2018/6/30 17:02:00 |
|------------------|------|--------------------|

无下划线, 字体颜色: 自动设置

|                  |      |                    |
|------------------|------|--------------------|
| 页 62: [316] 带格式的 | User | 2018/6/30 17:02:00 |
|------------------|------|--------------------|

无下划线, 字体颜色: 自动设置

|                  |      |                    |
|------------------|------|--------------------|
| 页 62: [317] 带格式的 | User | 2018/6/30 17:02:00 |
|------------------|------|--------------------|

无下划线, 字体颜色: 自动设置

|                  |      |                    |
|------------------|------|--------------------|
| 页 62: [318] 带格式的 | User | 2018/6/30 17:02:00 |
|------------------|------|--------------------|

无下划线, 字体颜色: 自动设置

|                  |      |                    |
|------------------|------|--------------------|
| 页 62: [319] 带格式的 | User | 2018/6/30 17:02:00 |
|------------------|------|--------------------|

无下划线, 字体颜色: 自动设置

|                  |      |                    |
|------------------|------|--------------------|
| 页 62: [320] 带格式的 | User | 2018/6/30 17:02:00 |
|------------------|------|--------------------|

无下划线, 字体颜色: 自动设置

|                  |      |                    |
|------------------|------|--------------------|
| 页 62: [321] 带格式的 | User | 2018/6/30 17:02:00 |
|------------------|------|--------------------|

无下划线, 字体颜色: 自动设置

|                  |      |                    |
|------------------|------|--------------------|
| 页 62: [322] 带格式的 | User | 2018/6/30 17:02:00 |
|------------------|------|--------------------|

无下划线, 字体颜色: 自动设置

|                  |      |                    |
|------------------|------|--------------------|
| 页 62: [323] 带格式的 | User | 2018/6/30 17:15:00 |
|------------------|------|--------------------|

定义网格后不调整右缩进, 不对齐到网格

|                  |      |                    |
|------------------|------|--------------------|
| 页 62: [324] 带格式的 | User | 2018/6/30 17:02:00 |
|------------------|------|--------------------|

无下划线, 字体颜色: 自动设置

|                  |      |                    |
|------------------|------|--------------------|
| 页 62: [325] 带格式的 | User | 2018/6/30 17:02:00 |
|------------------|------|--------------------|

无下划线, 字体颜色: 自动设置

|                  |      |                    |
|------------------|------|--------------------|
| 页 62: [326] 带格式的 | User | 2018/6/30 17:02:00 |
|------------------|------|--------------------|

无下划线, 字体颜色: 自动设置

|                  |      |                    |
|------------------|------|--------------------|
| 页 62: [327] 带格式的 | User | 2018/6/30 17:02:00 |
|------------------|------|--------------------|

无下划线, 字体颜色: 自动设置

|                  |      |                    |
|------------------|------|--------------------|
| 页 62: [328] 带格式的 | User | 2018/6/30 17:02:00 |
|------------------|------|--------------------|

无下划线, 字体颜色: 自动设置

|                  |      |                    |
|------------------|------|--------------------|
| 页 62: [329] 带格式的 | User | 2018/6/30 17:02:00 |
|------------------|------|--------------------|

无下划线, 字体颜色: 自动设置

|                  |      |                    |
|------------------|------|--------------------|
| 页 62: [330] 带格式的 | User | 2018/6/30 17:02:00 |
|------------------|------|--------------------|

无下划线, 字体颜色: 自动设置

|                  |      |                    |
|------------------|------|--------------------|
| 页 62: [331] 带格式的 | User | 2018/6/30 17:02:00 |
|------------------|------|--------------------|

无下划线, 字体颜色: 自动设置

|                  |      |                    |
|------------------|------|--------------------|
| 页 62: [332] 带格式的 | User | 2018/6/30 17:02:00 |
|------------------|------|--------------------|

无下划线, 字体颜色: 自动设置

|                  |      |                    |
|------------------|------|--------------------|
| 页 62: [333] 带格式的 | User | 2018/6/30 17:02:00 |
|------------------|------|--------------------|

无下划线, 字体颜色: 自动设置

|                  |      |                    |
|------------------|------|--------------------|
| 页 62: [334] 带格式的 | User | 2018/6/30 17:02:00 |
|------------------|------|--------------------|

无下划线, 字体颜色: 自动设置

|                  |      |                    |
|------------------|------|--------------------|
| 页 62: [335] 带格式的 | User | 2018/6/30 17:02:00 |
|------------------|------|--------------------|

无下划线, 字体颜色: 自动设置

|                  |      |                    |
|------------------|------|--------------------|
| 页 62: [336] 带格式的 | User | 2018/6/30 17:02:00 |
|------------------|------|--------------------|

无下划线, 字体颜色: 自动设置

|                  |      |                    |
|------------------|------|--------------------|
| 页 62: [337] 带格式的 | User | 2018/6/30 17:02:00 |
|------------------|------|--------------------|

无下划线, 字体颜色: 自动设置

|                  |      |                    |
|------------------|------|--------------------|
| 页 62: [338] 带格式的 | User | 2018/6/30 17:15:00 |
|------------------|------|--------------------|

定义网格后不调整右缩进, 不对齐到网格

|                  |      |                    |
|------------------|------|--------------------|
| 页 62: [339] 带格式的 | User | 2018/6/30 17:02:00 |
|------------------|------|--------------------|

无下划线, 字体颜色: 自动设置

|                  |      |                    |
|------------------|------|--------------------|
| 页 62: [340] 带格式的 | User | 2018/6/30 17:02:00 |
|------------------|------|--------------------|

无下划线, 字体颜色: 自动设置

|                  |      |                    |
|------------------|------|--------------------|
| 页 62: [341] 带格式的 | User | 2018/6/30 17:02:00 |
|------------------|------|--------------------|

无下划线, 字体颜色: 自动设置

|                  |      |                    |
|------------------|------|--------------------|
| 页 62: [342] 带格式的 | User | 2018/6/30 17:02:00 |
|------------------|------|--------------------|

无下划线, 字体颜色: 自动设置

|                  |      |                    |
|------------------|------|--------------------|
| 页 62: [343] 带格式的 | User | 2018/6/30 17:02:00 |
|------------------|------|--------------------|

无下划线, 字体颜色: 自动设置

|                  |      |                    |
|------------------|------|--------------------|
| 页 62: [344] 带格式的 | User | 2018/6/30 17:02:00 |
|------------------|------|--------------------|

无下划线, 字体颜色: 自动设置

|                  |      |                    |
|------------------|------|--------------------|
| 页 62: [345] 带格式的 | User | 2018/6/30 17:02:00 |
|------------------|------|--------------------|

无下划线, 字体颜色: 自动设置

|                  |      |                    |
|------------------|------|--------------------|
| 页 62: [346] 带格式的 | User | 2018/6/30 17:02:00 |
|------------------|------|--------------------|

无下划线, 字体颜色: 自动设置

|                  |      |                    |
|------------------|------|--------------------|
| 页 62: [347] 带格式的 | User | 2018/6/30 17:02:00 |
|------------------|------|--------------------|

无下划线, 字体颜色: 自动设置

|                  |      |                    |
|------------------|------|--------------------|
| 页 62: [348] 带格式的 | User | 2018/6/30 17:02:00 |
|------------------|------|--------------------|

无下划线, 字体颜色: 自动设置

|                  |      |                    |
|------------------|------|--------------------|
| 页 62: [349] 带格式的 | User | 2018/6/30 17:02:00 |
|------------------|------|--------------------|

无下划线, 字体颜色: 自动设置

|                  |      |                    |
|------------------|------|--------------------|
| 页 62: [350] 带格式的 | User | 2018/6/30 17:02:00 |
|------------------|------|--------------------|

无下划线, 字体颜色: 自动设置

|                  |      |                    |
|------------------|------|--------------------|
| 页 62: [351] 带格式的 | User | 2018/6/30 17:02:00 |
|------------------|------|--------------------|

无下划线, 字体颜色: 自动设置

|                  |      |                    |
|------------------|------|--------------------|
| 页 62: [352] 带格式的 | User | 2018/6/30 17:02:00 |
|------------------|------|--------------------|

无下划线, 字体颜色: 自动设置

|                  |      |                    |
|------------------|------|--------------------|
| 页 62: [353] 带格式的 | User | 2018/6/30 17:15:00 |
|------------------|------|--------------------|

定义网格后不调整右缩进, 不对齐到网格

|                  |      |                    |
|------------------|------|--------------------|
| 页 62: [354] 带格式的 | User | 2018/6/30 17:02:00 |
|------------------|------|--------------------|

无下划线, 字体颜色: 自动设置

|                  |      |                    |
|------------------|------|--------------------|
| 页 62: [355] 带格式的 | User | 2018/6/30 17:02:00 |
|------------------|------|--------------------|

无下划线, 字体颜色: 自动设置

|                  |      |                    |
|------------------|------|--------------------|
| 页 62: [356] 带格式的 | User | 2018/6/30 17:02:00 |
|------------------|------|--------------------|

无下划线, 字体颜色: 自动设置

|                  |      |                    |
|------------------|------|--------------------|
| 页 62: [357] 带格式的 | User | 2018/6/30 17:02:00 |
|------------------|------|--------------------|

无下划线, 字体颜色: 自动设置

|                  |      |                    |
|------------------|------|--------------------|
| 页 62: [358] 带格式的 | User | 2018/6/30 17:02:00 |
|------------------|------|--------------------|

无下划线, 字体颜色: 自动设置

|                  |      |                    |
|------------------|------|--------------------|
| 页 62: [359] 带格式的 | User | 2018/6/30 17:02:00 |
|------------------|------|--------------------|

无下划线, 字体颜色: 自动设置

|                  |      |                    |
|------------------|------|--------------------|
| 页 62: [360] 带格式的 | User | 2018/6/30 17:02:00 |
|------------------|------|--------------------|

无下划线, 字体颜色: 自动设置

|                  |      |                    |
|------------------|------|--------------------|
| 页 62: [361] 带格式的 | User | 2018/6/30 17:02:00 |
|------------------|------|--------------------|

无下划线, 字体颜色: 自动设置

|                  |      |                    |
|------------------|------|--------------------|
| 页 62: [362] 带格式的 | User | 2018/6/30 17:02:00 |
|------------------|------|--------------------|

无下划线, 字体颜色: 自动设置

|                  |      |                    |
|------------------|------|--------------------|
| 页 62: [363] 带格式的 | User | 2018/6/30 17:02:00 |
|------------------|------|--------------------|

无下划线, 字体颜色: 自动设置

|                  |      |                    |
|------------------|------|--------------------|
| 页 62: [364] 带格式的 | User | 2018/6/30 17:02:00 |
|------------------|------|--------------------|

无下划线, 字体颜色: 自动设置

|                  |      |                    |
|------------------|------|--------------------|
| 页 62: [365] 带格式的 | User | 2018/6/30 17:02:00 |
|------------------|------|--------------------|

无下划线, 字体颜色: 自动设置

|                  |      |                    |
|------------------|------|--------------------|
| 页 62: [366] 带格式的 | User | 2018/6/30 17:02:00 |
|------------------|------|--------------------|

无下划线, 字体颜色: 自动设置

|                  |      |                    |
|------------------|------|--------------------|
| 页 62: [367] 带格式的 | User | 2018/6/30 17:02:00 |
|------------------|------|--------------------|

无下划线, 字体颜色: 自动设置

|                  |      |                    |
|------------------|------|--------------------|
| 页 62: [368] 带格式的 | User | 2018/6/30 17:15:00 |
|------------------|------|--------------------|

定义网格后不调整右缩进, 不对齐到网格

|                  |      |                    |
|------------------|------|--------------------|
| 页 62: [369] 带格式的 | User | 2018/6/30 17:02:00 |
|------------------|------|--------------------|

无下划线, 字体颜色: 自动设置

|                  |      |                    |
|------------------|------|--------------------|
| 页 62: [370] 带格式的 | User | 2018/6/30 17:02:00 |
|------------------|------|--------------------|

无下划线, 字体颜色: 自动设置

|                  |      |                    |
|------------------|------|--------------------|
| 页 62: [371] 带格式的 | User | 2018/6/30 17:02:00 |
|------------------|------|--------------------|

无下划线, 字体颜色: 自动设置

|                  |      |                    |
|------------------|------|--------------------|
| 页 62: [372] 带格式的 | User | 2018/6/30 17:02:00 |
|------------------|------|--------------------|

无下划线, 字体颜色: 自动设置

|                  |      |                    |
|------------------|------|--------------------|
| 页 62: [373] 带格式的 | User | 2018/6/30 17:02:00 |
|------------------|------|--------------------|

无下划线, 字体颜色: 自动设置

|                  |      |                    |
|------------------|------|--------------------|
| 页 62: [374] 带格式的 | User | 2018/6/30 17:02:00 |
|------------------|------|--------------------|



无下划线, 字体颜色: 自动设置

|                  |      |                    |
|------------------|------|--------------------|
| 页 62: [375] 带格式的 | User | 2018/6/30 17:02:00 |
|------------------|------|--------------------|

无下划线, 字体颜色: 自动设置

|                  |      |                    |
|------------------|------|--------------------|
| 页 62: [376] 带格式的 | User | 2018/6/30 17:02:00 |
|------------------|------|--------------------|

无下划线, 字体颜色: 自动设置

|                  |      |                    |
|------------------|------|--------------------|
| 页 62: [377] 带格式的 | User | 2018/6/30 17:02:00 |
|------------------|------|--------------------|

无下划线, 字体颜色: 自动设置

|                  |      |                    |
|------------------|------|--------------------|
| 页 62: [378] 带格式的 | User | 2018/6/30 17:02:00 |
|------------------|------|--------------------|

无下划线, 字体颜色: 自动设置

|                  |      |                    |
|------------------|------|--------------------|
| 页 62: [379] 带格式的 | User | 2018/6/30 17:02:00 |
|------------------|------|--------------------|

无下划线, 字体颜色: 自动设置

|                  |      |                    |
|------------------|------|--------------------|
| 页 62: [380] 带格式的 | User | 2018/6/30 17:02:00 |
|------------------|------|--------------------|

无下划线, 字体颜色: 自动设置

|                  |      |                    |
|------------------|------|--------------------|
| 页 62: [381] 带格式的 | User | 2018/6/30 17:02:00 |
|------------------|------|--------------------|

无下划线, 字体颜色: 自动设置

|                  |      |                    |
|------------------|------|--------------------|
| 页 62: [382] 带格式的 | User | 2018/6/30 17:02:00 |
|------------------|------|--------------------|

无下划线, 字体颜色: 自动设置

|                  |      |                    |
|------------------|------|--------------------|
| 页 62: [383] 带格式的 | User | 2018/6/30 17:15:00 |
|------------------|------|--------------------|

定义网格后不调整右缩进, 不对齐到网格

|                  |      |                    |
|------------------|------|--------------------|
| 页 62: [384] 带格式的 | User | 2018/6/30 17:02:00 |
|------------------|------|--------------------|

无下划线, 字体颜色: 自动设置

|                  |      |                    |
|------------------|------|--------------------|
| 页 62: [385] 带格式的 | User | 2018/6/30 17:02:00 |
|------------------|------|--------------------|

无下划线, 字体颜色: 自动设置

|                  |      |                    |
|------------------|------|--------------------|
| 页 62: [386] 带格式的 | User | 2018/6/30 17:02:00 |
|------------------|------|--------------------|

无下划线, 字体颜色: 自动设置

|                  |      |                    |
|------------------|------|--------------------|
| 页 62: [387] 带格式的 | User | 2018/6/30 17:02:00 |
|------------------|------|--------------------|

无下划线, 字体颜色: 自动设置

|                  |      |                    |
|------------------|------|--------------------|
| 页 62: [388] 带格式的 | User | 2018/6/30 17:02:00 |
|------------------|------|--------------------|

无下划线, 字体颜色: 自动设置

|                  |      |                    |
|------------------|------|--------------------|
| 页 62: [389] 带格式的 | User | 2018/6/30 17:02:00 |
|------------------|------|--------------------|

无下划线, 字体颜色: 自动设置

|                  |      |                    |
|------------------|------|--------------------|
| 页 62: [390] 带格式的 | User | 2018/6/30 17:02:00 |
|------------------|------|--------------------|

无下划线, 字体颜色: 自动设置

|                  |      |                    |
|------------------|------|--------------------|
| 页 62: [391] 带格式的 | User | 2018/6/30 17:02:00 |
|------------------|------|--------------------|

无下划线, 字体颜色: 自动设置

|                  |      |                    |
|------------------|------|--------------------|
| 页 62: [392] 带格式的 | User | 2018/6/30 17:02:00 |
|------------------|------|--------------------|

无下划线, 字体颜色: 自动设置

|                  |      |                    |
|------------------|------|--------------------|
| 页 62: [393] 带格式的 | User | 2018/6/30 17:02:00 |
|------------------|------|--------------------|

无下划线, 字体颜色: 自动设置

|                  |      |                    |
|------------------|------|--------------------|
| 页 62: [394] 带格式的 | User | 2018/6/30 17:02:00 |
|------------------|------|--------------------|

无下划线, 字体颜色: 自动设置

|                  |      |                    |
|------------------|------|--------------------|
| 页 62: [395] 带格式的 | User | 2018/6/30 17:02:00 |
|------------------|------|--------------------|

无下划线, 字体颜色: 自动设置

|                  |      |                    |
|------------------|------|--------------------|
| 页 62: [396] 带格式的 | User | 2018/6/30 17:02:00 |
|------------------|------|--------------------|

无下划线, 字体颜色: 自动设置

|                  |      |                    |
|------------------|------|--------------------|
| 页 63: [397] 带格式的 | User | 2018/6/30 17:02:00 |
|------------------|------|--------------------|

无下划线, 字体颜色: 自动设置

|                  |      |                    |
|------------------|------|--------------------|
| 页 63: [398] 带格式的 | User | 2018/6/30 17:02:00 |
|------------------|------|--------------------|

无下划线, 字体颜色: 自动设置

|                  |      |                    |
|------------------|------|--------------------|
| 页 63: [399] 带格式的 | User | 2018/6/30 17:15:00 |
|------------------|------|--------------------|

定义网格后不调整右缩进, 不对齐到网格

|                  |      |                    |
|------------------|------|--------------------|
| 页 63: [400] 带格式的 | User | 2018/6/30 17:02:00 |
|------------------|------|--------------------|

无下划线, 字体颜色: 自动设置

|                  |      |                    |
|------------------|------|--------------------|
| 页 63: [400] 带格式的 | User | 2018/6/30 17:02:00 |
|------------------|------|--------------------|

无下划线, 字体颜色: 自动设置

|                  |      |                    |
|------------------|------|--------------------|
| 页 63: [401] 带格式的 | User | 2018/6/30 17:02:00 |
|------------------|------|--------------------|

无下划线, 字体颜色: 自动设置

|                  |      |                    |
|------------------|------|--------------------|
| 页 63: [401] 带格式的 | User | 2018/6/30 17:02:00 |
|------------------|------|--------------------|

无下划线, 字体颜色: 自动设置

|                  |      |                    |
|------------------|------|--------------------|
| 页 63: [402] 带格式的 | User | 2018/6/30 17:02:00 |
|------------------|------|--------------------|

无下划线, 字体颜色: 自动设置

|                  |      |                    |
|------------------|------|--------------------|
| 页 63: [402] 带格式的 | User | 2018/6/30 17:02:00 |
|------------------|------|--------------------|

无下划线, 字体颜色: 自动设置

|                  |      |                    |
|------------------|------|--------------------|
| 页 63: [403] 带格式的 | User | 2018/6/30 17:02:00 |
|------------------|------|--------------------|

无下划线, 字体颜色: 自动设置

|                  |      |                    |
|------------------|------|--------------------|
| 页 63: [403] 带格式的 | User | 2018/6/30 17:02:00 |
|------------------|------|--------------------|

无下划线, 字体颜色: 自动设置

|                  |      |                    |
|------------------|------|--------------------|
| 页 63: [404] 带格式的 | User | 2018/6/30 17:02:00 |
|------------------|------|--------------------|

无下划线, 字体颜色: 自动设置

|                  |      |                    |
|------------------|------|--------------------|
| 页 63: [404] 带格式的 | User | 2018/6/30 17:02:00 |
|------------------|------|--------------------|

无下划线, 字体颜色: 自动设置

|                  |      |                    |
|------------------|------|--------------------|
| 页 63: [405] 带格式的 | User | 2018/6/30 17:02:00 |
|------------------|------|--------------------|

无下划线, 字体颜色: 自动设置

|                  |      |                    |
|------------------|------|--------------------|
| 页 63: [405] 带格式的 | User | 2018/6/30 17:02:00 |
|------------------|------|--------------------|

无下划线, 字体颜色: 自动设置

|                  |      |                    |
|------------------|------|--------------------|
| 页 63: [406] 带格式的 | User | 2018/6/30 17:02:00 |
|------------------|------|--------------------|

无下划线, 字体颜色: 自动设置

|                  |      |                    |
|------------------|------|--------------------|
| 页 63: [406] 带格式的 | User | 2018/6/30 17:02:00 |
|------------------|------|--------------------|

无下划线, 字体颜色: 自动设置

|                  |      |                    |
|------------------|------|--------------------|
| 页 63: [407] 带格式的 | User | 2018/6/30 17:02:00 |
|------------------|------|--------------------|

无下划线, 字体颜色: 自动设置

|                  |      |                    |
|------------------|------|--------------------|
| 页 63: [407] 带格式的 | User | 2018/6/30 17:02:00 |
|------------------|------|--------------------|

无下划线, 字体颜色: 自动设置

|                  |      |                    |
|------------------|------|--------------------|
| 页 63: [408] 带格式的 | User | 2018/6/30 17:02:00 |
|------------------|------|--------------------|

无下划线, 字体颜色: 自动设置

|                  |      |                    |
|------------------|------|--------------------|
| 页 63: [408] 带格式的 | User | 2018/6/30 17:02:00 |
|------------------|------|--------------------|

无下划线, 字体颜色: 自动设置

|                  |      |                    |
|------------------|------|--------------------|
| 页 63: [409] 带格式的 | User | 2018/6/30 17:02:00 |
|------------------|------|--------------------|

无下划线, 字体颜色: 自动设置

|                  |      |                    |
|------------------|------|--------------------|
| 页 63: [409] 带格式的 | User | 2018/6/30 17:02:00 |
|------------------|------|--------------------|

无下划线, 字体颜色: 自动设置

|                  |      |                    |
|------------------|------|--------------------|
| 页 63: [410] 带格式的 | User | 2018/6/30 17:02:00 |
|------------------|------|--------------------|

无下划线, 字体颜色: 自动设置

|                  |      |                    |
|------------------|------|--------------------|
| 页 63: [410] 带格式的 | User | 2018/6/30 17:02:00 |
|------------------|------|--------------------|

无下划线, 字体颜色: 自动设置

|                  |      |                    |
|------------------|------|--------------------|
| 页 63: [411] 带格式的 | User | 2018/6/30 17:02:00 |
|------------------|------|--------------------|

无下划线, 字体颜色: 自动设置

|                  |      |                    |
|------------------|------|--------------------|
| 页 63: [411] 带格式的 | User | 2018/6/30 17:02:00 |
|------------------|------|--------------------|

无下划线, 字体颜色: 自动设置

|                  |      |                    |
|------------------|------|--------------------|
| 页 63: [412] 带格式的 | User | 2018/6/30 17:02:00 |
|------------------|------|--------------------|

无下划线, 字体颜色: 自动设置

|                  |      |                    |
|------------------|------|--------------------|
| 页 63: [412] 带格式的 | User | 2018/6/30 17:02:00 |
|------------------|------|--------------------|

无下划线, 字体颜色: 自动设置

|                  |      |                    |
|------------------|------|--------------------|
| 页 63: [413] 带格式的 | User | 2018/6/30 17:02:00 |
|------------------|------|--------------------|

无下划线, 字体颜色: 自动设置

|                  |      |                    |
|------------------|------|--------------------|
| 页 63: [413] 带格式的 | User | 2018/6/30 17:02:00 |
|------------------|------|--------------------|

无下划线, 字体颜色: 自动设置

|                  |      |                    |
|------------------|------|--------------------|
| 页 63: [414] 带格式的 | User | 2018/6/30 17:02:00 |
|------------------|------|--------------------|

无下划线, 字体颜色: 自动设置

|                  |      |                    |
|------------------|------|--------------------|
| 页 63: [414] 带格式的 | User | 2018/6/30 17:02:00 |
|------------------|------|--------------------|

无下划线, 字体颜色: 自动设置

|                  |      |                    |
|------------------|------|--------------------|
| 页 63: [415] 带格式的 | User | 2018/6/30 17:02:00 |
|------------------|------|--------------------|

无下划线, 字体颜色: 自动设置

|                  |      |                    |
|------------------|------|--------------------|
| 页 63: [415] 带格式的 | User | 2018/6/30 17:02:00 |
|------------------|------|--------------------|

无下划线, 字体颜色: 自动设置

|                  |      |                    |
|------------------|------|--------------------|
| 页 63: [416] 带格式的 | User | 2018/6/30 17:02:00 |
|------------------|------|--------------------|

无下划线, 字体颜色: 自动设置

|                  |      |                    |
|------------------|------|--------------------|
| 页 63: [416] 带格式的 | User | 2018/6/30 17:02:00 |
|------------------|------|--------------------|

无下划线, 字体颜色: 自动设置

|                  |      |                    |
|------------------|------|--------------------|
| 页 63: [417] 带格式的 | User | 2018/6/30 17:02:00 |
|------------------|------|--------------------|

无下划线, 字体颜色: 自动设置

|                  |      |                    |
|------------------|------|--------------------|
| 页 63: [417] 带格式的 | User | 2018/6/30 17:02:00 |
|------------------|------|--------------------|

无下划线, 字体颜色: 自动设置

|                  |      |                    |
|------------------|------|--------------------|
| 页 63: [418] 带格式的 | User | 2018/6/30 17:02:00 |
|------------------|------|--------------------|

无下划线, 字体颜色: 自动设置

|                  |      |                    |
|------------------|------|--------------------|
| 页 63: [418] 带格式的 | User | 2018/6/30 17:02:00 |
|------------------|------|--------------------|

无下划线, 字体颜色: 自动设置

|                  |      |                    |
|------------------|------|--------------------|
| 页 63: [419] 带格式的 | User | 2018/6/30 17:02:00 |
|------------------|------|--------------------|

无下划线, 字体颜色: 自动设置

|                  |      |                    |
|------------------|------|--------------------|
| 页 63: [419] 带格式的 | User | 2018/6/30 17:02:00 |
|------------------|------|--------------------|

无下划线, 字体颜色: 自动设置

|                  |      |                    |
|------------------|------|--------------------|
| 页 63: [420] 带格式的 | User | 2018/6/30 17:02:00 |
|------------------|------|--------------------|

无下划线, 字体颜色: 自动设置

|                  |      |                    |
|------------------|------|--------------------|
| 页 63: [420] 带格式的 | User | 2018/6/30 17:02:00 |
|------------------|------|--------------------|

无下划线, 字体颜色: 自动设置

|                  |      |                    |
|------------------|------|--------------------|
| 页 63: [421] 带格式的 | User | 2018/6/30 17:02:00 |
|------------------|------|--------------------|

无下划线, 字体颜色: 自动设置

|                  |      |                    |
|------------------|------|--------------------|
| 页 63: [421] 带格式的 | User | 2018/6/30 17:02:00 |
|------------------|------|--------------------|

无下划线, 字体颜色: 自动设置

|                  |      |                    |
|------------------|------|--------------------|
| 页 63: [422] 带格式的 | User | 2018/6/30 17:02:00 |
|------------------|------|--------------------|

无下划线, 字体颜色: 自动设置

|                  |      |                    |
|------------------|------|--------------------|
| 页 63: [422] 带格式的 | User | 2018/6/30 17:02:00 |
|------------------|------|--------------------|

无下划线, 字体颜色: 自动设置

|                  |      |                    |
|------------------|------|--------------------|
| 页 63: [423] 带格式的 | User | 2018/6/30 17:02:00 |
|------------------|------|--------------------|

无下划线, 字体颜色: 自动设置

|                  |      |                    |
|------------------|------|--------------------|
| 页 63: [423] 带格式的 | User | 2018/6/30 17:02:00 |
|------------------|------|--------------------|

无下划线, 字体颜色: 自动设置

|                  |      |                    |
|------------------|------|--------------------|
| 页 63: [424] 带格式的 | User | 2018/6/30 17:02:00 |
|------------------|------|--------------------|

无下划线, 字体颜色: 自动设置

|                  |      |                    |
|------------------|------|--------------------|
| 页 63: [424] 带格式的 | User | 2018/6/30 17:02:00 |
|------------------|------|--------------------|

无下划线, 字体颜色: 自动设置

|                  |      |                    |
|------------------|------|--------------------|
| 页 63: [425] 带格式的 | User | 2018/6/30 17:02:00 |
|------------------|------|--------------------|

无下划线, 字体颜色: 自动设置

|                  |      |                    |
|------------------|------|--------------------|
| 页 63: [425] 带格式的 | User | 2018/6/30 17:02:00 |
|------------------|------|--------------------|

无下划线, 字体颜色: 自动设置

|                  |      |                    |
|------------------|------|--------------------|
| 页 63: [426] 带格式的 | User | 2018/6/30 17:02:00 |
|------------------|------|--------------------|

无下划线, 字体颜色: 自动设置

|                  |      |                    |
|------------------|------|--------------------|
| 页 63: [427] 带格式的 | User | 2018/6/30 17:15:00 |
|------------------|------|--------------------|

定义网格后不调整右缩进, 不对齐到网格

|                  |      |                    |
|------------------|------|--------------------|
| 页 63: [428] 带格式的 | User | 2018/6/30 17:02:00 |
|------------------|------|--------------------|

无下划线, 字体颜色: 自动设置

|                  |      |                    |
|------------------|------|--------------------|
| 页 63: [428] 带格式的 | User | 2018/6/30 17:02:00 |
|------------------|------|--------------------|

无下划线, 字体颜色: 自动设置

|                  |      |                    |
|------------------|------|--------------------|
| 页 63: [429] 带格式的 | User | 2018/6/30 17:02:00 |
|------------------|------|--------------------|

无下划线, 字体颜色: 自动设置

|                  |      |                    |
|------------------|------|--------------------|
| 页 63: [429] 带格式的 | User | 2018/6/30 17:02:00 |
|------------------|------|--------------------|

无下划线, 字体颜色: 自动设置

|                  |      |                    |
|------------------|------|--------------------|
| 页 63: [430] 带格式的 | User | 2018/6/30 17:02:00 |
|------------------|------|--------------------|

无下划线, 字体颜色: 自动设置

|                  |      |                    |
|------------------|------|--------------------|
| 页 63: [430] 带格式的 | User | 2018/6/30 17:02:00 |
|------------------|------|--------------------|

无下划线, 字体颜色: 自动设置

|                  |      |                    |
|------------------|------|--------------------|
| 页 63: [431] 带格式的 | User | 2018/6/30 17:02:00 |
|------------------|------|--------------------|

无下划线, 字体颜色: 自动设置

|                  |      |                    |
|------------------|------|--------------------|
| 页 63: [431] 带格式的 | User | 2018/6/30 17:02:00 |
|------------------|------|--------------------|

无下划线, 字体颜色: 自动设置

|                  |      |                    |
|------------------|------|--------------------|
| 页 63: [432] 带格式的 | User | 2018/6/30 17:02:00 |
|------------------|------|--------------------|

无下划线, 字体颜色: 自动设置

|                  |      |                    |
|------------------|------|--------------------|
| 页 63: [432] 带格式的 | User | 2018/6/30 17:02:00 |
|------------------|------|--------------------|

无下划线, 字体颜色: 自动设置

|                  |      |                    |
|------------------|------|--------------------|
| 页 63: [433] 带格式的 | User | 2018/6/30 17:02:00 |
|------------------|------|--------------------|

无下划线, 字体颜色: 自动设置

|                  |      |                    |
|------------------|------|--------------------|
| 页 63: [433] 带格式的 | User | 2018/6/30 17:02:00 |
|------------------|------|--------------------|

无下划线, 字体颜色: 自动设置

|                  |      |                    |
|------------------|------|--------------------|
| 页 63: [434] 带格式的 | User | 2018/6/30 17:02:00 |
|------------------|------|--------------------|

无下划线, 字体颜色: 自动设置

|                  |      |                    |
|------------------|------|--------------------|
| 页 63: [434] 带格式的 | User | 2018/6/30 17:02:00 |
|------------------|------|--------------------|

无下划线, 字体颜色: 自动设置



|                  |      |                    |
|------------------|------|--------------------|
| 页 63: [435] 带格式的 | User | 2018/6/30 17:02:00 |
|------------------|------|--------------------|

无下划线, 字体颜色: 自动设置

|                  |      |                    |
|------------------|------|--------------------|
| 页 63: [435] 带格式的 | User | 2018/6/30 17:02:00 |
|------------------|------|--------------------|

无下划线, 字体颜色: 自动设置

|                  |      |                    |
|------------------|------|--------------------|
| 页 63: [436] 带格式的 | User | 2018/6/30 17:02:00 |
|------------------|------|--------------------|

无下划线, 字体颜色: 自动设置

|                  |      |                    |
|------------------|------|--------------------|
| 页 63: [436] 带格式的 | User | 2018/6/30 17:02:00 |
|------------------|------|--------------------|

无下划线, 字体颜色: 自动设置

|                  |      |                    |
|------------------|------|--------------------|
| 页 63: [437] 带格式的 | User | 2018/6/30 17:02:00 |
|------------------|------|--------------------|

无下划线, 字体颜色: 自动设置

|                  |      |                    |
|------------------|------|--------------------|
| 页 63: [437] 带格式的 | User | 2018/6/30 17:02:00 |
|------------------|------|--------------------|

无下划线, 字体颜色: 自动设置

|                  |      |                    |
|------------------|------|--------------------|
| 页 63: [438] 带格式的 | User | 2018/6/30 17:02:00 |
|------------------|------|--------------------|

无下划线, 字体颜色: 自动设置

|                  |      |                    |
|------------------|------|--------------------|
| 页 63: [438] 带格式的 | User | 2018/6/30 17:02:00 |
|------------------|------|--------------------|

无下划线, 字体颜色: 自动设置

|                  |      |                    |
|------------------|------|--------------------|
| 页 63: [439] 带格式的 | User | 2018/6/30 17:02:00 |
|------------------|------|--------------------|

无下划线, 字体颜色: 自动设置

|                  |      |                    |
|------------------|------|--------------------|
| 页 63: [439] 带格式的 | User | 2018/6/30 17:02:00 |
|------------------|------|--------------------|

无下划线, 字体颜色: 自动设置

|                  |      |                    |
|------------------|------|--------------------|
| 页 63: [440] 带格式的 | User | 2018/6/30 17:02:00 |
|------------------|------|--------------------|

无下划线, 字体颜色: 自动设置

|                  |      |                    |
|------------------|------|--------------------|
| 页 63: [440] 带格式的 | User | 2018/6/30 17:02:00 |
|------------------|------|--------------------|

无下划线, 字体颜色: 自动设置

|                  |      |                    |
|------------------|------|--------------------|
| 页 63: [441] 带格式的 | User | 2018/6/30 17:02:00 |
|------------------|------|--------------------|

无下划线, 字体颜色: 自动设置

|                  |      |                    |
|------------------|------|--------------------|
| 页 63: [442] 带格式的 | User | 2018/6/30 17:15:00 |
|------------------|------|--------------------|

定义网格后不调整右缩进, 不对齐到网格

|                  |      |                    |
|------------------|------|--------------------|
| 页 63: [443] 带格式的 | User | 2018/6/30 17:02:00 |
|------------------|------|--------------------|

无下划线, 字体颜色: 自动设置

|                  |      |                    |
|------------------|------|--------------------|
| 页 63: [443] 带格式的 | User | 2018/6/30 17:02:00 |
|------------------|------|--------------------|

无下划线, 字体颜色: 自动设置

|                  |      |                    |
|------------------|------|--------------------|
| 页 63: [444] 带格式的 | User | 2018/6/30 17:02:00 |
|------------------|------|--------------------|

无下划线, 字体颜色: 自动设置

|                  |      |                    |
|------------------|------|--------------------|
| 页 63: [444] 带格式的 | User | 2018/6/30 17:02:00 |
|------------------|------|--------------------|

无下划线, 字体颜色: 自动设置

|                  |      |                    |
|------------------|------|--------------------|
| 页 63: [445] 带格式的 | User | 2018/6/30 17:02:00 |
|------------------|------|--------------------|

无下划线, 字体颜色: 自动设置

|                  |      |                    |
|------------------|------|--------------------|
| 页 63: [445] 带格式的 | User | 2018/6/30 17:02:00 |
|------------------|------|--------------------|

无下划线, 字体颜色: 自动设置

|                  |      |                    |
|------------------|------|--------------------|
| 页 63: [446] 带格式的 | User | 2018/6/30 17:02:00 |
|------------------|------|--------------------|

无下划线, 字体颜色: 自动设置

|                  |      |                    |
|------------------|------|--------------------|
| 页 63: [446] 带格式的 | User | 2018/6/30 17:02:00 |
|------------------|------|--------------------|

无下划线, 字体颜色: 自动设置

|                  |      |                    |
|------------------|------|--------------------|
| 页 63: [447] 带格式的 | User | 2018/6/30 17:02:00 |
|------------------|------|--------------------|

无下划线, 字体颜色: 自动设置

|                  |      |                    |
|------------------|------|--------------------|
| 页 63: [447] 带格式的 | User | 2018/6/30 17:02:00 |
|------------------|------|--------------------|

无下划线, 字体颜色: 自动设置

|                  |      |                    |
|------------------|------|--------------------|
| 页 63: [448] 带格式的 | User | 2018/6/30 17:02:00 |
|------------------|------|--------------------|

无下划线, 字体颜色: 自动设置

|                  |      |                    |
|------------------|------|--------------------|
| 页 63: [448] 带格式的 | User | 2018/6/30 17:02:00 |
|------------------|------|--------------------|

无下划线, 字体颜色: 自动设置

|                  |      |                    |
|------------------|------|--------------------|
| 页 63: [449] 带格式的 | User | 2018/6/30 17:02:00 |
|------------------|------|--------------------|

无下划线, 字体颜色: 自动设置

|                  |      |                    |
|------------------|------|--------------------|
| 页 63: [449] 带格式的 | User | 2018/6/30 17:02:00 |
|------------------|------|--------------------|

无下划线, 字体颜色: 自动设置

|                  |      |                    |
|------------------|------|--------------------|
| 页 63: [450] 带格式的 | User | 2018/6/30 17:02:00 |
|------------------|------|--------------------|

无下划线, 字体颜色: 自动设置

|                  |      |                    |
|------------------|------|--------------------|
| 页 63: [450] 带格式的 | User | 2018/6/30 17:02:00 |
|------------------|------|--------------------|

无下划线, 字体颜色: 自动设置

|                  |      |                    |
|------------------|------|--------------------|
| 页 63: [451] 带格式的 | User | 2018/6/30 17:02:00 |
|------------------|------|--------------------|

无下划线, 字体颜色: 自动设置

|                  |      |                    |
|------------------|------|--------------------|
| 页 63: [451] 带格式的 | User | 2018/6/30 17:02:00 |
|------------------|------|--------------------|

无下划线, 字体颜色: 自动设置

|                  |      |                    |
|------------------|------|--------------------|
| 页 63: [452] 带格式的 | User | 2018/6/30 17:02:00 |
|------------------|------|--------------------|

无下划线, 字体颜色: 自动设置

|                  |      |                    |
|------------------|------|--------------------|
| 页 63: [452] 带格式的 | User | 2018/6/30 17:02:00 |
|------------------|------|--------------------|

无下划线, 字体颜色: 自动设置

|                  |      |                    |
|------------------|------|--------------------|
| 页 63: [453] 带格式的 | User | 2018/6/30 17:02:00 |
|------------------|------|--------------------|

无下划线, 字体颜色: 自动设置

|                  |      |                    |
|------------------|------|--------------------|
| 页 63: [453] 带格式的 | User | 2018/6/30 17:02:00 |
|------------------|------|--------------------|

无下划线, 字体颜色: 自动设置

|                  |      |                    |
|------------------|------|--------------------|
| 页 63: [454] 带格式的 | User | 2018/6/30 17:02:00 |
|------------------|------|--------------------|

无下划线, 字体颜色: 自动设置

|                  |      |                    |
|------------------|------|--------------------|
| 页 63: [454] 带格式的 | User | 2018/6/30 17:02:00 |
|------------------|------|--------------------|

无下划线, 字体颜色: 自动设置

|                  |      |                    |
|------------------|------|--------------------|
| 页 63: [455] 带格式的 | User | 2018/6/30 17:02:00 |
|------------------|------|--------------------|

无下划线, 字体颜色: 自动设置

|                  |      |                    |
|------------------|------|--------------------|
| 页 63: [455] 带格式的 | User | 2018/6/30 17:02:00 |
|------------------|------|--------------------|

无下划线, 字体颜色: 自动设置

|                  |      |                    |
|------------------|------|--------------------|
| 页 63: [456] 带格式的 | User | 2018/6/30 17:02:00 |
|------------------|------|--------------------|

无下划线, 字体颜色: 自动设置

|                  |      |                    |
|------------------|------|--------------------|
| 页 63: [457] 带格式的 | User | 2018/6/30 17:15:00 |
|------------------|------|--------------------|

定义网格后不调整右缩进, 不对齐到网格

|                  |      |                    |
|------------------|------|--------------------|
| 页 63: [458] 带格式的 | User | 2018/6/30 17:02:00 |
|------------------|------|--------------------|

无下划线, 字体颜色: 自动设置

|                  |      |                    |
|------------------|------|--------------------|
| 页 63: [458] 带格式的 | User | 2018/6/30 17:02:00 |
|------------------|------|--------------------|

无下划线, 字体颜色: 自动设置

|                  |      |                    |
|------------------|------|--------------------|
| 页 63: [459] 带格式的 | User | 2018/6/30 17:02:00 |
|------------------|------|--------------------|

无下划线, 字体颜色: 自动设置

|                  |      |                    |
|------------------|------|--------------------|
| 页 63: [459] 带格式的 | User | 2018/6/30 17:02:00 |
|------------------|------|--------------------|

无下划线, 字体颜色: 自动设置

|                  |      |                    |
|------------------|------|--------------------|
| 页 63: [460] 带格式的 | User | 2018/6/30 17:02:00 |
|------------------|------|--------------------|

无下划线, 字体颜色: 自动设置

|                  |      |                    |
|------------------|------|--------------------|
| 页 63: [460] 带格式的 | User | 2018/6/30 17:02:00 |
|------------------|------|--------------------|

无下划线, 字体颜色: 自动设置

|                  |      |                    |
|------------------|------|--------------------|
| 页 63: [461] 带格式的 | User | 2018/6/30 17:02:00 |
|------------------|------|--------------------|

无下划线, 字体颜色: 自动设置

|                  |      |                    |
|------------------|------|--------------------|
| 页 63: [461] 带格式的 | User | 2018/6/30 17:02:00 |
|------------------|------|--------------------|

无下划线, 字体颜色: 自动设置

|                  |      |                    |
|------------------|------|--------------------|
| 页 63: [462] 带格式的 | User | 2018/6/30 17:02:00 |
|------------------|------|--------------------|

无下划线, 字体颜色: 自动设置

|                  |      |                    |
|------------------|------|--------------------|
| 页 63: [462] 带格式的 | User | 2018/6/30 17:02:00 |
|------------------|------|--------------------|

无下划线, 字体颜色: 自动设置

|                  |      |                    |
|------------------|------|--------------------|
| 页 63: [463] 带格式的 | User | 2018/6/30 17:02:00 |
|------------------|------|--------------------|

无下划线, 字体颜色: 自动设置

|                  |      |                    |
|------------------|------|--------------------|
| 页 63: [463] 带格式的 | User | 2018/6/30 17:02:00 |
|------------------|------|--------------------|

无下划线, 字体颜色: 自动设置

|                  |      |                    |
|------------------|------|--------------------|
| 页 63: [464] 带格式的 | User | 2018/6/30 17:02:00 |
|------------------|------|--------------------|

无下划线, 字体颜色: 自动设置

|                  |      |                    |
|------------------|------|--------------------|
| 页 63: [464] 带格式的 | User | 2018/6/30 17:02:00 |
|------------------|------|--------------------|

无下划线, 字体颜色: 自动设置

|                  |      |                    |
|------------------|------|--------------------|
| 页 63: [465] 带格式的 | User | 2018/6/30 17:02:00 |
|------------------|------|--------------------|

无下划线, 字体颜色: 自动设置

|                  |      |                    |
|------------------|------|--------------------|
| 页 63: [465] 带格式的 | User | 2018/6/30 17:02:00 |
|------------------|------|--------------------|

无下划线, 字体颜色: 自动设置

|                  |      |                    |
|------------------|------|--------------------|
| 页 63: [466] 带格式的 | User | 2018/6/30 17:02:00 |
|------------------|------|--------------------|

无下划线, 字体颜色: 自动设置

|                  |      |                    |
|------------------|------|--------------------|
| 页 63: [466] 带格式的 | User | 2018/6/30 17:02:00 |
|------------------|------|--------------------|

无下划线, 字体颜色: 自动设置

|                  |      |                    |
|------------------|------|--------------------|
| 页 63: [467] 带格式的 | User | 2018/6/30 17:02:00 |
|------------------|------|--------------------|

无下划线, 字体颜色: 自动设置

|                  |      |                    |
|------------------|------|--------------------|
| 页 63: [467] 带格式的 | User | 2018/6/30 17:02:00 |
|------------------|------|--------------------|

无下划线, 字体颜色: 自动设置

|                  |      |                    |
|------------------|------|--------------------|
| 页 63: [468] 带格式的 | User | 2018/6/30 17:02:00 |
|------------------|------|--------------------|

无下划线, 字体颜色: 自动设置

|                  |      |                    |
|------------------|------|--------------------|
| 页 63: [468] 带格式的 | User | 2018/6/30 17:02:00 |
|------------------|------|--------------------|

无下划线, 字体颜色: 自动设置

|                  |      |                    |
|------------------|------|--------------------|
| 页 63: [469] 带格式的 | User | 2018/6/30 17:02:00 |
|------------------|------|--------------------|

无下划线, 字体颜色: 自动设置

|                  |      |                    |
|------------------|------|--------------------|
| 页 63: [469] 带格式的 | User | 2018/6/30 17:02:00 |
|------------------|------|--------------------|

无下划线, 字体颜色: 自动设置

|                  |      |                    |
|------------------|------|--------------------|
| 页 63: [470] 带格式的 | User | 2018/6/30 17:02:00 |
|------------------|------|--------------------|

无下划线, 字体颜色: 自动设置

|                  |      |                    |
|------------------|------|--------------------|
| 页 63: [470] 带格式的 | User | 2018/6/30 17:02:00 |
|------------------|------|--------------------|

无下划线, 字体颜色: 自动设置

|                  |      |                    |
|------------------|------|--------------------|
| 页 63: [471] 带格式的 | User | 2018/6/30 17:02:00 |
|------------------|------|--------------------|

无下划线, 字体颜色: 自动设置

|                  |      |                    |
|------------------|------|--------------------|
| 页 63: [472] 带格式的 | User | 2018/6/30 17:15:00 |
|------------------|------|--------------------|

定义网格后不调整右缩进, 不对齐到网格

|                  |      |                    |
|------------------|------|--------------------|
| 页 63: [473] 带格式的 | User | 2018/6/30 17:02:00 |
|------------------|------|--------------------|

无下划线, 字体颜色: 自动设置

|                  |      |                    |
|------------------|------|--------------------|
| 页 63: [473] 带格式的 | User | 2018/6/30 17:02:00 |
|------------------|------|--------------------|

无下划线, 字体颜色: 自动设置

|                  |      |                    |
|------------------|------|--------------------|
| 页 63: [474] 带格式的 | User | 2018/6/30 17:02:00 |
|------------------|------|--------------------|

无下划线, 字体颜色: 自动设置

|                  |      |                    |
|------------------|------|--------------------|
| 页 63: [474] 带格式的 | User | 2018/6/30 17:02:00 |
|------------------|------|--------------------|

无下划线, 字体颜色: 自动设置

|                  |      |                    |
|------------------|------|--------------------|
| 页 63: [475] 带格式的 | User | 2018/6/30 17:02:00 |
|------------------|------|--------------------|

无下划线, 字体颜色: 自动设置

|                  |      |                    |
|------------------|------|--------------------|
| 页 63: [475] 带格式的 | User | 2018/6/30 17:02:00 |
|------------------|------|--------------------|

无下划线, 字体颜色: 自动设置

|                  |      |                    |
|------------------|------|--------------------|
| 页 63: [476] 带格式的 | User | 2018/6/30 17:02:00 |
|------------------|------|--------------------|

无下划线, 字体颜色: 自动设置

|                  |      |                    |
|------------------|------|--------------------|
| 页 63: [476] 带格式的 | User | 2018/6/30 17:02:00 |
|------------------|------|--------------------|

无下划线, 字体颜色: 自动设置

|                  |      |                    |
|------------------|------|--------------------|
| 页 63: [477] 带格式的 | User | 2018/6/30 17:02:00 |
|------------------|------|--------------------|

无下划线, 字体颜色: 自动设置

|                  |      |                    |
|------------------|------|--------------------|
| 页 63: [477] 带格式的 | User | 2018/6/30 17:02:00 |
|------------------|------|--------------------|

无下划线, 字体颜色: 自动设置

|                  |      |                    |
|------------------|------|--------------------|
| 页 63: [478] 带格式的 | User | 2018/6/30 17:02:00 |
|------------------|------|--------------------|

无下划线, 字体颜色: 自动设置

|                  |      |                    |
|------------------|------|--------------------|
| 页 63: [478] 带格式的 | User | 2018/6/30 17:02:00 |
|------------------|------|--------------------|

无下划线, 字体颜色: 自动设置

|                  |      |                    |
|------------------|------|--------------------|
| 页 63: [479] 带格式的 | User | 2018/6/30 17:02:00 |
|------------------|------|--------------------|

无下划线, 字体颜色: 自动设置

|                  |      |                    |
|------------------|------|--------------------|
| 页 63: [479] 带格式的 | User | 2018/6/30 17:02:00 |
|------------------|------|--------------------|

无下划线, 字体颜色: 自动设置

|                  |      |                    |
|------------------|------|--------------------|
| 页 63: [480] 带格式的 | User | 2018/6/30 17:02:00 |
|------------------|------|--------------------|

无下划线, 字体颜色: 自动设置

|                  |      |                    |
|------------------|------|--------------------|
| 页 63: [480] 带格式的 | User | 2018/6/30 17:02:00 |
|------------------|------|--------------------|

无下划线, 字体颜色: 自动设置

|                  |      |                    |
|------------------|------|--------------------|
| 页 63: [481] 带格式的 | User | 2018/6/30 17:02:00 |
|------------------|------|--------------------|

无下划线, 字体颜色: 自动设置

|                  |      |                    |
|------------------|------|--------------------|
| 页 63: [481] 带格式的 | User | 2018/6/30 17:02:00 |
|------------------|------|--------------------|

无下划线, 字体颜色: 自动设置

|                  |      |                    |
|------------------|------|--------------------|
| 页 63: [482] 带格式的 | User | 2018/6/30 17:02:00 |
|------------------|------|--------------------|

无下划线, 字体颜色: 自动设置

|                  |      |                    |
|------------------|------|--------------------|
| 页 63: [482] 带格式的 | User | 2018/6/30 17:02:00 |
|------------------|------|--------------------|

无下划线, 字体颜色: 自动设置

|                  |      |                    |
|------------------|------|--------------------|
| 页 63: [483] 带格式的 | User | 2018/6/30 17:02:00 |
|------------------|------|--------------------|

无下划线, 字体颜色: 自动设置

|                  |      |                    |
|------------------|------|--------------------|
| 页 63: [483] 带格式的 | User | 2018/6/30 17:02:00 |
|------------------|------|--------------------|

无下划线, 字体颜色: 自动设置

|                  |      |                    |
|------------------|------|--------------------|
| 页 63: [484] 带格式的 | User | 2018/6/30 17:02:00 |
|------------------|------|--------------------|

无下划线, 字体颜色: 自动设置



|                  |      |                    |
|------------------|------|--------------------|
| 页 63: [484] 带格式的 | User | 2018/6/30 17:02:00 |
|------------------|------|--------------------|

无下划线, 字体颜色: 自动设置

|                  |      |                    |
|------------------|------|--------------------|
| 页 63: [485] 带格式的 | User | 2018/6/30 17:02:00 |
|------------------|------|--------------------|

无下划线, 字体颜色: 自动设置

|                  |      |                    |
|------------------|------|--------------------|
| 页 63: [485] 带格式的 | User | 2018/6/30 17:02:00 |
|------------------|------|--------------------|

无下划线, 字体颜色: 自动设置

|                  |      |                    |
|------------------|------|--------------------|
| 页 63: [486] 带格式的 | User | 2018/6/30 17:02:00 |
|------------------|------|--------------------|

无下划线, 字体颜色: 自动设置

|                  |      |                    |
|------------------|------|--------------------|
| 页 63: [487] 带格式的 | User | 2018/6/30 17:15:00 |
|------------------|------|--------------------|

定义网格后不调整右缩进, 不对齐到网格

|                  |      |                    |
|------------------|------|--------------------|
| 页 63: [488] 带格式的 | User | 2018/6/30 17:02:00 |
|------------------|------|--------------------|

无下划线, 字体颜色: 自动设置

|                  |      |                    |
|------------------|------|--------------------|
| 页 63: [488] 带格式的 | User | 2018/6/30 17:02:00 |
|------------------|------|--------------------|

无下划线, 字体颜色: 自动设置

|                  |      |                    |
|------------------|------|--------------------|
| 页 63: [489] 带格式的 | User | 2018/6/30 17:02:00 |
|------------------|------|--------------------|

无下划线, 字体颜色: 自动设置

|                  |      |                    |
|------------------|------|--------------------|
| 页 63: [489] 带格式的 | User | 2018/6/30 17:02:00 |
|------------------|------|--------------------|

无下划线, 字体颜色: 自动设置

|                  |      |                    |
|------------------|------|--------------------|
| 页 63: [490] 带格式的 | User | 2018/6/30 17:02:00 |
|------------------|------|--------------------|

无下划线, 字体颜色: 自动设置

|                  |      |                    |
|------------------|------|--------------------|
| 页 63: [490] 带格式的 | User | 2018/6/30 17:02:00 |
|------------------|------|--------------------|

无下划线, 字体颜色: 自动设置

|                  |      |                    |
|------------------|------|--------------------|
| 页 63: [491] 带格式的 | User | 2018/6/30 17:02:00 |
|------------------|------|--------------------|

无下划线, 字体颜色: 自动设置

|                  |      |                    |
|------------------|------|--------------------|
| 页 63: [491] 带格式的 | User | 2018/6/30 17:02:00 |
|------------------|------|--------------------|

无下划线, 字体颜色: 自动设置

|                  |      |                    |
|------------------|------|--------------------|
| 页 63: [492] 带格式的 | User | 2018/6/30 17:02:00 |
|------------------|------|--------------------|

无下划线, 字体颜色: 自动设置

|                  |      |                    |
|------------------|------|--------------------|
| 页 63: [492] 带格式的 | User | 2018/6/30 17:02:00 |
|------------------|------|--------------------|

无下划线, 字体颜色: 自动设置

|                  |      |                    |
|------------------|------|--------------------|
| 页 63: [493] 带格式的 | User | 2018/6/30 17:02:00 |
|------------------|------|--------------------|

无下划线, 字体颜色: 自动设置

|                  |      |                    |
|------------------|------|--------------------|
| 页 63: [493] 带格式的 | User | 2018/6/30 17:02:00 |
|------------------|------|--------------------|

无下划线, 字体颜色: 自动设置

|                  |      |                    |
|------------------|------|--------------------|
| 页 63: [494] 带格式的 | User | 2018/6/30 17:02:00 |
|------------------|------|--------------------|

无下划线, 字体颜色: 自动设置

|                  |      |                    |
|------------------|------|--------------------|
| 页 63: [494] 带格式的 | User | 2018/6/30 17:02:00 |
|------------------|------|--------------------|

无下划线, 字体颜色: 自动设置

|                  |      |                    |
|------------------|------|--------------------|
| 页 63: [495] 带格式的 | User | 2018/6/30 17:02:00 |
|------------------|------|--------------------|

无下划线, 字体颜色: 自动设置

|                  |      |                    |
|------------------|------|--------------------|
| 页 63: [495] 带格式的 | User | 2018/6/30 17:02:00 |
|------------------|------|--------------------|

无下划线, 字体颜色: 自动设置

|                  |      |                    |
|------------------|------|--------------------|
| 页 63: [496] 带格式的 | User | 2018/6/30 17:02:00 |
|------------------|------|--------------------|

无下划线, 字体颜色: 自动设置

|                  |      |                    |
|------------------|------|--------------------|
| 页 63: [496] 带格式的 | User | 2018/6/30 17:02:00 |
|------------------|------|--------------------|

无下划线, 字体颜色: 自动设置

|                  |      |                    |
|------------------|------|--------------------|
| 页 63: [497] 带格式的 | User | 2018/6/30 17:02:00 |
|------------------|------|--------------------|

无下划线, 字体颜色: 自动设置

|                  |      |                    |
|------------------|------|--------------------|
| 页 63: [497] 带格式的 | User | 2018/6/30 17:02:00 |
|------------------|------|--------------------|

无下划线, 字体颜色: 自动设置

|                  |      |                    |
|------------------|------|--------------------|
| 页 63: [498] 带格式的 | User | 2018/6/30 17:02:00 |
|------------------|------|--------------------|

无下划线, 字体颜色: 自动设置

|                  |      |                    |
|------------------|------|--------------------|
| 页 63: [498] 带格式的 | User | 2018/6/30 17:02:00 |
|------------------|------|--------------------|

无下划线, 字体颜色: 自动设置

|                  |      |                    |
|------------------|------|--------------------|
| 页 63: [499] 带格式的 | User | 2018/6/30 17:02:00 |
|------------------|------|--------------------|

无下划线, 字体颜色: 自动设置

|                  |      |                    |
|------------------|------|--------------------|
| 页 63: [499] 带格式的 | User | 2018/6/30 17:02:00 |
|------------------|------|--------------------|

无下划线, 字体颜色: 自动设置

|                  |      |                    |
|------------------|------|--------------------|
| 页 63: [500] 带格式的 | User | 2018/6/30 17:02:00 |
|------------------|------|--------------------|

无下划线, 字体颜色: 自动设置

|                  |      |                    |
|------------------|------|--------------------|
| 页 63: [500] 带格式的 | User | 2018/6/30 17:02:00 |
|------------------|------|--------------------|

无下划线, 字体颜色: 自动设置

|                  |      |                    |
|------------------|------|--------------------|
| 页 63: [501] 带格式的 | User | 2018/6/30 17:02:00 |
|------------------|------|--------------------|

无下划线, 字体颜色: 自动设置

|                  |      |                    |
|------------------|------|--------------------|
| 页 63: [502] 带格式的 | User | 2018/6/30 17:15:00 |
|------------------|------|--------------------|

定义网格后不调整右缩进, 不对齐到网格

|                  |      |                    |
|------------------|------|--------------------|
| 页 63: [503] 带格式的 | User | 2018/6/30 17:02:00 |
|------------------|------|--------------------|

无下划线, 字体颜色: 自动设置

|                  |      |                    |
|------------------|------|--------------------|
| 页 63: [503] 带格式的 | User | 2018/6/30 17:02:00 |
|------------------|------|--------------------|

无下划线, 字体颜色: 自动设置

|                  |      |                    |
|------------------|------|--------------------|
| 页 63: [504] 带格式的 | User | 2018/6/30 17:02:00 |
|------------------|------|--------------------|

无下划线, 字体颜色: 自动设置

|                  |      |                    |
|------------------|------|--------------------|
| 页 63: [504] 带格式的 | User | 2018/6/30 17:02:00 |
|------------------|------|--------------------|

无下划线, 字体颜色: 自动设置

|                  |      |                    |
|------------------|------|--------------------|
| 页 63: [505] 带格式的 | User | 2018/6/30 17:02:00 |
|------------------|------|--------------------|

无下划线, 字体颜色: 自动设置

|                  |      |                    |
|------------------|------|--------------------|
| 页 63: [505] 带格式的 | User | 2018/6/30 17:02:00 |
|------------------|------|--------------------|

无下划线, 字体颜色: 自动设置

|                  |      |                    |
|------------------|------|--------------------|
| 页 63: [506] 带格式的 | User | 2018/6/30 17:02:00 |
|------------------|------|--------------------|

无下划线, 字体颜色: 自动设置

|                  |      |                    |
|------------------|------|--------------------|
| 页 63: [506] 带格式的 | User | 2018/6/30 17:02:00 |
|------------------|------|--------------------|

无下划线, 字体颜色: 自动设置

|                  |      |                    |
|------------------|------|--------------------|
| 页 63: [507] 带格式的 | User | 2018/6/30 17:02:00 |
|------------------|------|--------------------|

无下划线, 字体颜色: 自动设置

|                  |      |                    |
|------------------|------|--------------------|
| 页 63: [507] 带格式的 | User | 2018/6/30 17:02:00 |
|------------------|------|--------------------|

无下划线, 字体颜色: 自动设置

|                  |      |                    |
|------------------|------|--------------------|
| 页 63: [508] 带格式的 | User | 2018/6/30 17:02:00 |
|------------------|------|--------------------|

无下划线, 字体颜色: 自动设置

|                  |      |                    |
|------------------|------|--------------------|
| 页 63: [508] 带格式的 | User | 2018/6/30 17:02:00 |
|------------------|------|--------------------|

无下划线, 字体颜色: 自动设置

|                  |      |                    |
|------------------|------|--------------------|
| 页 63: [509] 带格式的 | User | 2018/6/30 17:02:00 |
|------------------|------|--------------------|

无下划线, 字体颜色: 自动设置

|                  |      |                    |
|------------------|------|--------------------|
| 页 63: [509] 带格式的 | User | 2018/6/30 17:02:00 |
|------------------|------|--------------------|

无下划线, 字体颜色: 自动设置

|                  |      |                    |
|------------------|------|--------------------|
| 页 63: [510] 带格式的 | User | 2018/6/30 17:02:00 |
|------------------|------|--------------------|

无下划线, 字体颜色: 自动设置

|                  |      |                    |
|------------------|------|--------------------|
| 页 63: [510] 带格式的 | User | 2018/6/30 17:02:00 |
|------------------|------|--------------------|

无下划线, 字体颜色: 自动设置

|                  |      |                    |
|------------------|------|--------------------|
| 页 63: [511] 带格式的 | User | 2018/6/30 17:02:00 |
|------------------|------|--------------------|

无下划线, 字体颜色: 自动设置

|                  |      |                    |
|------------------|------|--------------------|
| 页 63: [511] 带格式的 | User | 2018/6/30 17:02:00 |
|------------------|------|--------------------|

无下划线, 字体颜色: 自动设置

|                  |      |                    |
|------------------|------|--------------------|
| 页 63: [512] 带格式的 | User | 2018/6/30 17:02:00 |
|------------------|------|--------------------|

无下划线, 字体颜色: 自动设置

|                  |      |                    |
|------------------|------|--------------------|
| 页 63: [512] 带格式的 | User | 2018/6/30 17:02:00 |
|------------------|------|--------------------|

无下划线, 字体颜色: 自动设置

|                  |      |                    |
|------------------|------|--------------------|
| 页 63: [513] 带格式的 | User | 2018/6/30 17:02:00 |
|------------------|------|--------------------|

无下划线, 字体颜色: 自动设置

|                  |      |                    |
|------------------|------|--------------------|
| 页 63: [513] 带格式的 | User | 2018/6/30 17:02:00 |
|------------------|------|--------------------|

无下划线, 字体颜色: 自动设置

|                  |      |                    |
|------------------|------|--------------------|
| 页 63: [514] 带格式的 | User | 2018/6/30 17:02:00 |
|------------------|------|--------------------|

无下划线, 字体颜色: 自动设置

|                  |      |                    |
|------------------|------|--------------------|
| 页 63: [514] 带格式的 | User | 2018/6/30 17:02:00 |
|------------------|------|--------------------|

无下划线, 字体颜色: 自动设置

|                  |      |                    |
|------------------|------|--------------------|
| 页 63: [515] 带格式的 | User | 2018/6/30 17:02:00 |
|------------------|------|--------------------|

无下划线, 字体颜色: 自动设置

|                  |      |                    |
|------------------|------|--------------------|
| 页 63: [515] 带格式的 | User | 2018/6/30 17:02:00 |
|------------------|------|--------------------|

无下划线, 字体颜色: 自动设置

|                  |      |                    |
|------------------|------|--------------------|
| 页 63: [516] 带格式的 | User | 2018/6/30 17:02:00 |
|------------------|------|--------------------|

无下划线, 字体颜色: 自动设置

|                  |      |                    |
|------------------|------|--------------------|
| 页 63: [517] 带格式的 | User | 2018/6/30 17:15:00 |
|------------------|------|--------------------|

定义网格后不调整右缩进, 不对齐到网格

|                  |      |                    |
|------------------|------|--------------------|
| 页 63: [518] 带格式的 | User | 2018/6/30 17:02:00 |
|------------------|------|--------------------|

无下划线, 字体颜色: 自动设置

|                  |      |                    |
|------------------|------|--------------------|
| 页 63: [518] 带格式的 | User | 2018/6/30 17:02:00 |
|------------------|------|--------------------|

无下划线, 字体颜色: 自动设置

|                  |      |                    |
|------------------|------|--------------------|
| 页 63: [519] 带格式的 | User | 2018/6/30 17:02:00 |
|------------------|------|--------------------|

无下划线, 字体颜色: 自动设置

|                  |      |                    |
|------------------|------|--------------------|
| 页 63: [519] 带格式的 | User | 2018/6/30 17:02:00 |
|------------------|------|--------------------|

无下划线, 字体颜色: 自动设置

|                  |      |                    |
|------------------|------|--------------------|
| 页 63: [520] 带格式的 | User | 2018/6/30 17:02:00 |
|------------------|------|--------------------|

无下划线, 字体颜色: 自动设置

|                  |      |                    |
|------------------|------|--------------------|
| 页 63: [520] 带格式的 | User | 2018/6/30 17:02:00 |
|------------------|------|--------------------|

无下划线, 字体颜色: 自动设置

|                  |      |                    |
|------------------|------|--------------------|
| 页 63: [521] 带格式的 | User | 2018/6/30 17:02:00 |
|------------------|------|--------------------|

无下划线, 字体颜色: 自动设置

|                  |      |                    |
|------------------|------|--------------------|
| 页 63: [521] 带格式的 | User | 2018/6/30 17:02:00 |
|------------------|------|--------------------|

无下划线, 字体颜色: 自动设置

|                  |      |                    |
|------------------|------|--------------------|
| 页 63: [522] 带格式的 | User | 2018/6/30 17:02:00 |
|------------------|------|--------------------|

无下划线, 字体颜色: 自动设置

|                  |      |                    |
|------------------|------|--------------------|
| 页 63: [522] 带格式的 | User | 2018/6/30 17:02:00 |
|------------------|------|--------------------|

无下划线, 字体颜色: 自动设置

|                  |      |                    |
|------------------|------|--------------------|
| 页 63: [523] 带格式的 | User | 2018/6/30 17:02:00 |
|------------------|------|--------------------|

无下划线, 字体颜色: 自动设置

|                  |      |                    |
|------------------|------|--------------------|
| 页 63: [523] 带格式的 | User | 2018/6/30 17:02:00 |
|------------------|------|--------------------|

无下划线, 字体颜色: 自动设置

|                  |      |                    |
|------------------|------|--------------------|
| 页 63: [524] 带格式的 | User | 2018/6/30 17:02:00 |
|------------------|------|--------------------|

无下划线, 字体颜色: 自动设置

|                  |      |                    |
|------------------|------|--------------------|
| 页 63: [524] 带格式的 | User | 2018/6/30 17:02:00 |
|------------------|------|--------------------|

无下划线, 字体颜色: 自动设置

|                  |      |                    |
|------------------|------|--------------------|
| 页 63: [525] 带格式的 | User | 2018/6/30 17:02:00 |
|------------------|------|--------------------|

无下划线, 字体颜色: 自动设置

|                  |      |                    |
|------------------|------|--------------------|
| 页 63: [525] 带格式的 | User | 2018/6/30 17:02:00 |
|------------------|------|--------------------|

无下划线, 字体颜色: 自动设置

|                  |      |                    |
|------------------|------|--------------------|
| 页 63: [526] 带格式的 | User | 2018/6/30 17:02:00 |
|------------------|------|--------------------|

无下划线, 字体颜色: 自动设置

|                  |      |                    |
|------------------|------|--------------------|
| 页 63: [526] 带格式的 | User | 2018/6/30 17:02:00 |
|------------------|------|--------------------|

无下划线, 字体颜色: 自动设置

|                  |      |                    |
|------------------|------|--------------------|
| 页 63: [527] 带格式的 | User | 2018/6/30 17:02:00 |
|------------------|------|--------------------|

无下划线, 字体颜色: 自动设置

|                  |      |                    |
|------------------|------|--------------------|
| 页 63: [527] 带格式的 | User | 2018/6/30 17:02:00 |
|------------------|------|--------------------|

无下划线, 字体颜色: 自动设置

|                  |      |                    |
|------------------|------|--------------------|
| 页 63: [528] 带格式的 | User | 2018/6/30 17:02:00 |
|------------------|------|--------------------|

无下划线, 字体颜色: 自动设置

|                  |      |                    |
|------------------|------|--------------------|
| 页 63: [528] 带格式的 | User | 2018/6/30 17:02:00 |
|------------------|------|--------------------|

无下划线, 字体颜色: 自动设置

|                  |      |                    |
|------------------|------|--------------------|
| 页 63: [529] 带格式的 | User | 2018/6/30 17:02:00 |
|------------------|------|--------------------|

无下划线, 字体颜色: 自动设置

|                  |      |                    |
|------------------|------|--------------------|
| 页 63: [529] 带格式的 | User | 2018/6/30 17:02:00 |
|------------------|------|--------------------|

无下划线, 字体颜色: 自动设置

|                  |      |                    |
|------------------|------|--------------------|
| 页 63: [530] 带格式的 | User | 2018/6/30 17:02:00 |
|------------------|------|--------------------|

无下划线, 字体颜色: 自动设置

|                  |      |                    |
|------------------|------|--------------------|
| 页 63: [530] 带格式的 | User | 2018/6/30 17:02:00 |
|------------------|------|--------------------|

无下划线, 字体颜色: 自动设置

|                  |      |                    |
|------------------|------|--------------------|
| 页 63: [531] 带格式的 | User | 2018/6/30 17:02:00 |
|------------------|------|--------------------|

无下划线, 字体颜色: 自动设置

|                  |      |                    |
|------------------|------|--------------------|
| 页 63: [532] 带格式的 | User | 2018/6/30 17:15:00 |
|------------------|------|--------------------|

定义网格后不调整右缩进, 不对齐到网格

|                  |      |                    |
|------------------|------|--------------------|
| 页 63: [533] 带格式的 | User | 2018/6/30 17:02:00 |
|------------------|------|--------------------|

无下划线, 字体颜色: 自动设置

|                  |      |                    |
|------------------|------|--------------------|
| 页 63: [533] 带格式的 | User | 2018/6/30 17:02:00 |
|------------------|------|--------------------|

无下划线, 字体颜色: 自动设置

|                  |      |                    |
|------------------|------|--------------------|
| 页 63: [534] 带格式的 | User | 2018/6/30 17:02:00 |
|------------------|------|--------------------|

无下划线, 字体颜色: 自动设置

|                  |      |                    |
|------------------|------|--------------------|
| 页 63: [534] 带格式的 | User | 2018/6/30 17:02:00 |
|------------------|------|--------------------|

无下划线, 字体颜色: 自动设置

|                  |      |                    |
|------------------|------|--------------------|
| 页 63: [535] 带格式的 | User | 2018/6/30 17:02:00 |
|------------------|------|--------------------|

无下划线, 字体颜色: 自动设置

|                  |      |                    |
|------------------|------|--------------------|
| 页 63: [535] 带格式的 | User | 2018/6/30 17:02:00 |
|------------------|------|--------------------|

无下划线, 字体颜色: 自动设置

|                  |      |                    |
|------------------|------|--------------------|
| 页 63: [536] 带格式的 | User | 2018/6/30 17:02:00 |
|------------------|------|--------------------|

无下划线, 字体颜色: 自动设置

|                  |      |                    |
|------------------|------|--------------------|
| 页 63: [536] 带格式的 | User | 2018/6/30 17:02:00 |
|------------------|------|--------------------|

无下划线, 字体颜色: 自动设置

|                  |      |                    |
|------------------|------|--------------------|
| 页 63: [537] 带格式的 | User | 2018/6/30 17:02:00 |
|------------------|------|--------------------|

无下划线, 字体颜色: 自动设置

|                  |      |                    |
|------------------|------|--------------------|
| 页 63: [537] 带格式的 | User | 2018/6/30 17:02:00 |
|------------------|------|--------------------|

无下划线, 字体颜色: 自动设置

|                  |      |                    |
|------------------|------|--------------------|
| 页 63: [538] 带格式的 | User | 2018/6/30 17:02:00 |
|------------------|------|--------------------|

无下划线, 字体颜色: 自动设置

|                  |      |                    |
|------------------|------|--------------------|
| 页 63: [538] 带格式的 | User | 2018/6/30 17:02:00 |
|------------------|------|--------------------|

无下划线, 字体颜色: 自动设置

|                  |      |                    |
|------------------|------|--------------------|
| 页 63: [539] 带格式的 | User | 2018/6/30 17:02:00 |
|------------------|------|--------------------|

无下划线, 字体颜色: 自动设置

|                  |      |                    |
|------------------|------|--------------------|
| 页 63: [539] 带格式的 | User | 2018/6/30 17:02:00 |
|------------------|------|--------------------|

无下划线, 字体颜色: 自动设置

|                  |      |                    |
|------------------|------|--------------------|
| 页 63: [540] 带格式的 | User | 2018/6/30 17:02:00 |
|------------------|------|--------------------|

无下划线, 字体颜色: 自动设置

|                  |      |                    |
|------------------|------|--------------------|
| 页 63: [540] 带格式的 | User | 2018/6/30 17:02:00 |
|------------------|------|--------------------|

无下划线, 字体颜色: 自动设置

|                  |      |                    |
|------------------|------|--------------------|
| 页 63: [541] 带格式的 | User | 2018/6/30 17:02:00 |
|------------------|------|--------------------|

无下划线, 字体颜色: 自动设置

|                  |      |                    |
|------------------|------|--------------------|
| 页 63: [541] 带格式的 | User | 2018/6/30 17:02:00 |
|------------------|------|--------------------|

无下划线, 字体颜色: 自动设置



|                  |      |                    |
|------------------|------|--------------------|
| 页 63: [542] 带格式的 | User | 2018/6/30 17:02:00 |
|------------------|------|--------------------|

无下划线, 字体颜色: 自动设置

|                  |      |                    |
|------------------|------|--------------------|
| 页 63: [542] 带格式的 | User | 2018/6/30 17:02:00 |
|------------------|------|--------------------|

无下划线, 字体颜色: 自动设置

|                  |      |                    |
|------------------|------|--------------------|
| 页 63: [543] 带格式的 | User | 2018/6/30 17:02:00 |
|------------------|------|--------------------|

无下划线, 字体颜色: 自动设置

|                  |      |                    |
|------------------|------|--------------------|
| 页 63: [543] 带格式的 | User | 2018/6/30 17:02:00 |
|------------------|------|--------------------|

无下划线, 字体颜色: 自动设置

|                  |      |                    |
|------------------|------|--------------------|
| 页 63: [544] 带格式的 | User | 2018/6/30 17:02:00 |
|------------------|------|--------------------|

无下划线, 字体颜色: 自动设置

|                  |      |                    |
|------------------|------|--------------------|
| 页 63: [544] 带格式的 | User | 2018/6/30 17:02:00 |
|------------------|------|--------------------|

无下划线, 字体颜色: 自动设置

|                  |      |                    |
|------------------|------|--------------------|
| 页 63: [545] 带格式的 | User | 2018/6/30 17:02:00 |
|------------------|------|--------------------|

无下划线, 字体颜色: 自动设置

|                  |      |                    |
|------------------|------|--------------------|
| 页 63: [545] 带格式的 | User | 2018/6/30 17:02:00 |
|------------------|------|--------------------|

无下划线, 字体颜色: 自动设置

|                  |      |                    |
|------------------|------|--------------------|
| 页 63: [546] 带格式的 | User | 2018/6/30 17:02:00 |
|------------------|------|--------------------|

无下划线, 字体颜色: 自动设置

|                  |      |                    |
|------------------|------|--------------------|
| 页 63: [547] 带格式的 | User | 2018/6/30 17:15:00 |
|------------------|------|--------------------|

定义网格后不调整右缩进, 不对齐到网格

|                  |      |                    |
|------------------|------|--------------------|
| 页 63: [548] 带格式的 | User | 2018/6/30 17:02:00 |
|------------------|------|--------------------|

无下划线, 字体颜色: 自动设置

|                  |      |                    |
|------------------|------|--------------------|
| 页 63: [548] 带格式的 | User | 2018/6/30 17:02:00 |
|------------------|------|--------------------|

无下划线, 字体颜色: 自动设置

|                  |      |                    |
|------------------|------|--------------------|
| 页 63: [549] 带格式的 | User | 2018/6/30 17:02:00 |
|------------------|------|--------------------|

无下划线, 字体颜色: 自动设置

|                  |      |                    |
|------------------|------|--------------------|
| 页 63: [549] 带格式的 | User | 2018/6/30 17:02:00 |
|------------------|------|--------------------|

无下划线, 字体颜色: 自动设置

|                  |      |                    |
|------------------|------|--------------------|
| 页 63: [550] 带格式的 | User | 2018/6/30 17:02:00 |
|------------------|------|--------------------|

无下划线, 字体颜色: 自动设置

|                  |      |                    |
|------------------|------|--------------------|
| 页 63: [550] 带格式的 | User | 2018/6/30 17:02:00 |
|------------------|------|--------------------|

无下划线, 字体颜色: 自动设置

|                  |      |                    |
|------------------|------|--------------------|
| 页 63: [551] 带格式的 | User | 2018/6/30 17:02:00 |
|------------------|------|--------------------|

无下划线, 字体颜色: 自动设置

|                  |      |                    |
|------------------|------|--------------------|
| 页 63: [551] 带格式的 | User | 2018/6/30 17:02:00 |
|------------------|------|--------------------|

无下划线, 字体颜色: 自动设置

|                  |      |                    |
|------------------|------|--------------------|
| 页 63: [552] 带格式的 | User | 2018/6/30 17:02:00 |
|------------------|------|--------------------|

无下划线, 字体颜色: 自动设置

|                  |      |                    |
|------------------|------|--------------------|
| 页 63: [552] 带格式的 | User | 2018/6/30 17:02:00 |
|------------------|------|--------------------|

无下划线, 字体颜色: 自动设置

|                  |      |                    |
|------------------|------|--------------------|
| 页 63: [553] 带格式的 | User | 2018/6/30 17:02:00 |
|------------------|------|--------------------|

无下划线, 字体颜色: 自动设置

|                  |      |                    |
|------------------|------|--------------------|
| 页 63: [553] 带格式的 | User | 2018/6/30 17:02:00 |
|------------------|------|--------------------|

无下划线, 字体颜色: 自动设置

|                  |      |                    |
|------------------|------|--------------------|
| 页 63: [554] 带格式的 | User | 2018/6/30 17:02:00 |
|------------------|------|--------------------|

无下划线, 字体颜色: 自动设置

|                  |      |                    |
|------------------|------|--------------------|
| 页 63: [554] 带格式的 | User | 2018/6/30 17:02:00 |
|------------------|------|--------------------|

无下划线, 字体颜色: 自动设置

|                  |      |                    |
|------------------|------|--------------------|
| 页 63: [555] 带格式的 | User | 2018/6/30 17:02:00 |
|------------------|------|--------------------|

无下划线, 字体颜色: 自动设置

|                  |      |                    |
|------------------|------|--------------------|
| 页 63: [555] 带格式的 | User | 2018/6/30 17:02:00 |
|------------------|------|--------------------|

无下划线, 字体颜色: 自动设置

|                  |      |                    |
|------------------|------|--------------------|
| 页 63: [556] 带格式的 | User | 2018/6/30 17:02:00 |
|------------------|------|--------------------|

无下划线, 字体颜色: 自动设置

|                  |      |                    |
|------------------|------|--------------------|
| 页 63: [556] 带格式的 | User | 2018/6/30 17:02:00 |
|------------------|------|--------------------|

无下划线, 字体颜色: 自动设置

|                  |      |                    |
|------------------|------|--------------------|
| 页 63: [557] 带格式的 | User | 2018/6/30 17:02:00 |
|------------------|------|--------------------|

无下划线, 字体颜色: 自动设置

|                  |      |                    |
|------------------|------|--------------------|
| 页 63: [557] 带格式的 | User | 2018/6/30 17:02:00 |
|------------------|------|--------------------|

无下划线, 字体颜色: 自动设置

|                  |      |                    |
|------------------|------|--------------------|
| 页 63: [558] 带格式的 | User | 2018/6/30 17:02:00 |
|------------------|------|--------------------|

无下划线, 字体颜色: 自动设置

|                  |      |                    |
|------------------|------|--------------------|
| 页 63: [558] 带格式的 | User | 2018/6/30 17:02:00 |
|------------------|------|--------------------|

无下划线, 字体颜色: 自动设置

|                  |      |                    |
|------------------|------|--------------------|
| 页 63: [559] 带格式的 | User | 2018/6/30 17:02:00 |
|------------------|------|--------------------|

无下划线, 字体颜色: 自动设置

|                  |      |                    |
|------------------|------|--------------------|
| 页 63: [559] 带格式的 | User | 2018/6/30 17:02:00 |
|------------------|------|--------------------|

无下划线, 字体颜色: 自动设置

|                  |      |                    |
|------------------|------|--------------------|
| 页 63: [560] 带格式的 | User | 2018/6/30 17:02:00 |
|------------------|------|--------------------|

无下划线, 字体颜色: 自动设置

|                  |      |                    |
|------------------|------|--------------------|
| 页 63: [560] 带格式的 | User | 2018/6/30 17:02:00 |
|------------------|------|--------------------|

无下划线, 字体颜色: 自动设置

|                  |      |                    |
|------------------|------|--------------------|
| 页 63: [561] 带格式的 | User | 2018/6/30 17:02:00 |
|------------------|------|--------------------|

无下划线, 字体颜色: 自动设置

|                  |      |                    |
|------------------|------|--------------------|
| 页 63: [562] 带格式的 | User | 2018/6/30 17:15:00 |
|------------------|------|--------------------|

定义网格后不调整右缩进, 不对齐到网格

|                  |      |                    |
|------------------|------|--------------------|
| 页 63: [563] 带格式的 | User | 2018/6/30 17:02:00 |
|------------------|------|--------------------|

无下划线, 字体颜色: 自动设置

|                  |      |                    |
|------------------|------|--------------------|
| 页 63: [563] 带格式的 | User | 2018/6/30 17:02:00 |
|------------------|------|--------------------|

无下划线, 字体颜色: 自动设置

|                  |      |                    |
|------------------|------|--------------------|
| 页 63: [564] 带格式的 | User | 2018/6/30 17:02:00 |
|------------------|------|--------------------|

无下划线, 字体颜色: 自动设置

|                  |      |                    |
|------------------|------|--------------------|
| 页 63: [564] 带格式的 | User | 2018/6/30 17:02:00 |
|------------------|------|--------------------|

无下划线, 字体颜色: 自动设置

|                  |      |                    |
|------------------|------|--------------------|
| 页 63: [565] 带格式的 | User | 2018/6/30 17:02:00 |
|------------------|------|--------------------|

无下划线, 字体颜色: 自动设置

|                  |      |                    |
|------------------|------|--------------------|
| 页 63: [565] 带格式的 | User | 2018/6/30 17:02:00 |
|------------------|------|--------------------|

无下划线, 字体颜色: 自动设置

|                  |      |                    |
|------------------|------|--------------------|
| 页 63: [566] 带格式的 | User | 2018/6/30 17:02:00 |
|------------------|------|--------------------|

无下划线, 字体颜色: 自动设置

|                  |      |                    |
|------------------|------|--------------------|
| 页 63: [566] 带格式的 | User | 2018/6/30 17:02:00 |
|------------------|------|--------------------|

无下划线, 字体颜色: 自动设置

|                  |      |                    |
|------------------|------|--------------------|
| 页 63: [567] 带格式的 | User | 2018/6/30 17:02:00 |
|------------------|------|--------------------|

无下划线, 字体颜色: 自动设置

|                  |      |                    |
|------------------|------|--------------------|
| 页 63: [567] 带格式的 | User | 2018/6/30 17:02:00 |
|------------------|------|--------------------|

无下划线, 字体颜色: 自动设置

|                  |      |                    |
|------------------|------|--------------------|
| 页 63: [568] 带格式的 | User | 2018/6/30 17:02:00 |
|------------------|------|--------------------|

无下划线, 字体颜色: 自动设置

|                  |      |                    |
|------------------|------|--------------------|
| 页 63: [568] 带格式的 | User | 2018/6/30 17:02:00 |
|------------------|------|--------------------|

无下划线, 字体颜色: 自动设置

|                  |      |                    |
|------------------|------|--------------------|
| 页 63: [569] 带格式的 | User | 2018/6/30 17:02:00 |
|------------------|------|--------------------|

无下划线, 字体颜色: 自动设置

|                  |      |                    |
|------------------|------|--------------------|
| 页 63: [569] 带格式的 | User | 2018/6/30 17:02:00 |
|------------------|------|--------------------|

无下划线, 字体颜色: 自动设置

|                  |      |                    |
|------------------|------|--------------------|
| 页 63: [570] 带格式的 | User | 2018/6/30 17:02:00 |
|------------------|------|--------------------|

无下划线, 字体颜色: 自动设置

|                  |      |                    |
|------------------|------|--------------------|
| 页 63: [570] 带格式的 | User | 2018/6/30 17:02:00 |
|------------------|------|--------------------|

无下划线, 字体颜色: 自动设置

|                  |      |                    |
|------------------|------|--------------------|
| 页 63: [571] 带格式的 | User | 2018/6/30 17:02:00 |
|------------------|------|--------------------|

无下划线, 字体颜色: 自动设置

|                  |      |                    |
|------------------|------|--------------------|
| 页 63: [571] 带格式的 | User | 2018/6/30 17:02:00 |
|------------------|------|--------------------|

无下划线, 字体颜色: 自动设置

|                  |      |                    |
|------------------|------|--------------------|
| 页 63: [572] 带格式的 | User | 2018/6/30 17:02:00 |
|------------------|------|--------------------|

无下划线, 字体颜色: 自动设置

|                  |      |                    |
|------------------|------|--------------------|
| 页 63: [572] 带格式的 | User | 2018/6/30 17:02:00 |
|------------------|------|--------------------|

无下划线, 字体颜色: 自动设置

|                  |      |                    |
|------------------|------|--------------------|
| 页 63: [573] 带格式的 | User | 2018/6/30 17:02:00 |
|------------------|------|--------------------|

无下划线, 字体颜色: 自动设置

|                  |      |                    |
|------------------|------|--------------------|
| 页 63: [573] 带格式的 | User | 2018/6/30 17:02:00 |
|------------------|------|--------------------|

无下划线, 字体颜色: 自动设置

|                  |      |                    |
|------------------|------|--------------------|
| 页 63: [574] 带格式的 | User | 2018/6/30 17:02:00 |
|------------------|------|--------------------|

无下划线, 字体颜色: 自动设置

|                  |      |                    |
|------------------|------|--------------------|
| 页 63: [574] 带格式的 | User | 2018/6/30 17:02:00 |
|------------------|------|--------------------|

无下划线, 字体颜色: 自动设置

|                  |      |                    |
|------------------|------|--------------------|
| 页 63: [575] 带格式的 | User | 2018/6/30 17:02:00 |
|------------------|------|--------------------|

无下划线, 字体颜色: 自动设置

|                  |      |                    |
|------------------|------|--------------------|
| 页 63: [575] 带格式的 | User | 2018/6/30 17:02:00 |
|------------------|------|--------------------|

无下划线, 字体颜色: 自动设置

|                  |      |                    |
|------------------|------|--------------------|
| 页 63: [576] 带格式的 | User | 2018/6/30 17:02:00 |
|------------------|------|--------------------|

无下划线, 字体颜色: 自动设置

|                  |      |                    |
|------------------|------|--------------------|
| 页 63: [577] 带格式的 | User | 2018/6/30 17:15:00 |
|------------------|------|--------------------|

定义网格后不调整右缩进, 不对齐到网格

|                  |      |                    |
|------------------|------|--------------------|
| 页 63: [578] 带格式的 | User | 2018/6/30 17:02:00 |
|------------------|------|--------------------|

无下划线, 字体颜色: 自动设置

|                  |      |                    |
|------------------|------|--------------------|
| 页 63: [578] 带格式的 | User | 2018/6/30 17:02:00 |
|------------------|------|--------------------|

无下划线, 字体颜色: 自动设置

|                  |      |                    |
|------------------|------|--------------------|
| 页 63: [579] 带格式的 | User | 2018/6/30 17:02:00 |
|------------------|------|--------------------|

无下划线, 字体颜色: 自动设置

|                  |      |                    |
|------------------|------|--------------------|
| 页 63: [579] 带格式的 | User | 2018/6/30 17:02:00 |
|------------------|------|--------------------|

无下划线, 字体颜色: 自动设置

|                  |      |                    |
|------------------|------|--------------------|
| 页 63: [580] 带格式的 | User | 2018/6/30 17:02:00 |
|------------------|------|--------------------|

无下划线, 字体颜色: 自动设置

|                  |      |                    |
|------------------|------|--------------------|
| 页 63: [580] 带格式的 | User | 2018/6/30 17:02:00 |
|------------------|------|--------------------|

无下划线, 字体颜色: 自动设置

|                  |      |                    |
|------------------|------|--------------------|
| 页 63: [581] 带格式的 | User | 2018/6/30 17:02:00 |
|------------------|------|--------------------|

无下划线, 字体颜色: 自动设置

|                  |      |                    |
|------------------|------|--------------------|
| 页 63: [581] 带格式的 | User | 2018/6/30 17:02:00 |
|------------------|------|--------------------|

无下划线, 字体颜色: 自动设置

|                  |      |                    |
|------------------|------|--------------------|
| 页 63: [582] 带格式的 | User | 2018/6/30 17:02:00 |
|------------------|------|--------------------|

无下划线, 字体颜色: 自动设置

|                  |      |                    |
|------------------|------|--------------------|
| 页 63: [582] 带格式的 | User | 2018/6/30 17:02:00 |
|------------------|------|--------------------|

无下划线, 字体颜色: 自动设置

|                  |      |                    |
|------------------|------|--------------------|
| 页 63: [583] 带格式的 | User | 2018/6/30 17:02:00 |
|------------------|------|--------------------|

无下划线, 字体颜色: 自动设置

|                  |      |                    |
|------------------|------|--------------------|
| 页 63: [583] 带格式的 | User | 2018/6/30 17:02:00 |
|------------------|------|--------------------|

无下划线, 字体颜色: 自动设置

|                  |      |                    |
|------------------|------|--------------------|
| 页 63: [584] 带格式的 | User | 2018/6/30 17:02:00 |
|------------------|------|--------------------|

无下划线, 字体颜色: 自动设置

|                  |      |                    |
|------------------|------|--------------------|
| 页 63: [584] 带格式的 | User | 2018/6/30 17:02:00 |
|------------------|------|--------------------|

无下划线, 字体颜色: 自动设置

|                  |      |                    |
|------------------|------|--------------------|
| 页 63: [585] 带格式的 | User | 2018/6/30 17:02:00 |
|------------------|------|--------------------|

无下划线, 字体颜色: 自动设置

|                  |      |                    |
|------------------|------|--------------------|
| 页 63: [585] 带格式的 | User | 2018/6/30 17:02:00 |
|------------------|------|--------------------|

无下划线, 字体颜色: 自动设置

|                  |      |                    |
|------------------|------|--------------------|
| 页 63: [586] 带格式的 | User | 2018/6/30 17:02:00 |
|------------------|------|--------------------|

无下划线, 字体颜色: 自动设置

|                  |      |                    |
|------------------|------|--------------------|
| 页 63: [586] 带格式的 | User | 2018/6/30 17:02:00 |
|------------------|------|--------------------|

无下划线, 字体颜色: 自动设置

|                  |      |                    |
|------------------|------|--------------------|
| 页 63: [587] 带格式的 | User | 2018/6/30 17:02:00 |
|------------------|------|--------------------|

无下划线, 字体颜色: 自动设置

|                  |      |                    |
|------------------|------|--------------------|
| 页 63: [587] 带格式的 | User | 2018/6/30 17:02:00 |
|------------------|------|--------------------|

无下划线, 字体颜色: 自动设置

|                  |      |                    |
|------------------|------|--------------------|
| 页 63: [588] 带格式的 | User | 2018/6/30 17:02:00 |
|------------------|------|--------------------|

无下划线, 字体颜色: 自动设置

|                  |      |                    |
|------------------|------|--------------------|
| 页 63: [588] 带格式的 | User | 2018/6/30 17:02:00 |
|------------------|------|--------------------|

无下划线, 字体颜色: 自动设置

|                  |      |                    |
|------------------|------|--------------------|
| 页 63: [589] 带格式的 | User | 2018/6/30 17:02:00 |
|------------------|------|--------------------|

无下划线, 字体颜色: 自动设置

|                  |      |                    |
|------------------|------|--------------------|
| 页 63: [589] 带格式的 | User | 2018/6/30 17:02:00 |
|------------------|------|--------------------|

无下划线, 字体颜色: 自动设置

|                  |      |                    |
|------------------|------|--------------------|
| 页 63: [590] 带格式的 | User | 2018/6/30 17:02:00 |
|------------------|------|--------------------|

无下划线, 字体颜色: 自动设置

|                  |      |                    |
|------------------|------|--------------------|
| 页 63: [590] 带格式的 | User | 2018/6/30 17:02:00 |
|------------------|------|--------------------|

无下划线, 字体颜色: 自动设置

|                  |      |                    |
|------------------|------|--------------------|
| 页 63: [591] 带格式的 | User | 2018/6/30 17:02:00 |
|------------------|------|--------------------|

无下划线, 字体颜色: 自动设置

|                  |      |                    |
|------------------|------|--------------------|
| 页 63: [592] 带格式的 | User | 2018/6/30 17:15:00 |
|------------------|------|--------------------|

定义网格后不调整右缩进, 不对齐到网格

|                  |      |                    |
|------------------|------|--------------------|
| 页 63: [593] 带格式的 | User | 2018/6/30 17:02:00 |
|------------------|------|--------------------|

无下划线, 字体颜色: 自动设置

|                  |      |                    |
|------------------|------|--------------------|
| 页 63: [593] 带格式的 | User | 2018/6/30 17:02:00 |
|------------------|------|--------------------|

无下划线, 字体颜色: 自动设置

|                  |      |                    |
|------------------|------|--------------------|
| 页 63: [594] 带格式的 | User | 2018/6/30 17:02:00 |
|------------------|------|--------------------|

无下划线, 字体颜色: 自动设置

|                  |      |                    |
|------------------|------|--------------------|
| 页 63: [594] 带格式的 | User | 2018/6/30 17:02:00 |
|------------------|------|--------------------|

无下划线, 字体颜色: 自动设置

|                  |      |                    |
|------------------|------|--------------------|
| 页 63: [595] 带格式的 | User | 2018/6/30 17:02:00 |
|------------------|------|--------------------|

无下划线, 字体颜色: 自动设置

|                  |      |                    |
|------------------|------|--------------------|
| 页 63: [595] 带格式的 | User | 2018/6/30 17:02:00 |
|------------------|------|--------------------|

无下划线, 字体颜色: 自动设置

|                  |      |                    |
|------------------|------|--------------------|
| 页 63: [596] 带格式的 | User | 2018/6/30 17:02:00 |
|------------------|------|--------------------|

无下划线, 字体颜色: 自动设置

|                  |      |                    |
|------------------|------|--------------------|
| 页 63: [596] 带格式的 | User | 2018/6/30 17:02:00 |
|------------------|------|--------------------|

无下划线, 字体颜色: 自动设置

|                  |      |                    |
|------------------|------|--------------------|
| 页 63: [597] 带格式的 | User | 2018/6/30 17:02:00 |
|------------------|------|--------------------|

无下划线, 字体颜色: 自动设置

|                  |      |                    |
|------------------|------|--------------------|
| 页 63: [597] 带格式的 | User | 2018/6/30 17:02:00 |
|------------------|------|--------------------|

无下划线, 字体颜色: 自动设置

|                  |      |                    |
|------------------|------|--------------------|
| 页 63: [598] 带格式的 | User | 2018/6/30 17:02:00 |
|------------------|------|--------------------|

无下划线, 字体颜色: 自动设置

|                  |      |                    |
|------------------|------|--------------------|
| 页 63: [598] 带格式的 | User | 2018/6/30 17:02:00 |
|------------------|------|--------------------|

无下划线, 字体颜色: 自动设置

|                  |      |                    |
|------------------|------|--------------------|
| 页 63: [599] 带格式的 | User | 2018/6/30 17:02:00 |
|------------------|------|--------------------|



无下划线, 字体颜色: 自动设置

|                  |      |                    |
|------------------|------|--------------------|
| 页 63: [599] 带格式的 | User | 2018/6/30 17:02:00 |
|------------------|------|--------------------|

无下划线, 字体颜色: 自动设置

|                  |      |                    |
|------------------|------|--------------------|
| 页 63: [600] 带格式的 | User | 2018/6/30 17:02:00 |
|------------------|------|--------------------|

无下划线, 字体颜色: 自动设置

|                  |      |                    |
|------------------|------|--------------------|
| 页 63: [600] 带格式的 | User | 2018/6/30 17:02:00 |
|------------------|------|--------------------|

无下划线, 字体颜色: 自动设置

|                  |      |                    |
|------------------|------|--------------------|
| 页 63: [601] 带格式的 | User | 2018/6/30 17:02:00 |
|------------------|------|--------------------|

无下划线, 字体颜色: 自动设置

|                  |      |                    |
|------------------|------|--------------------|
| 页 63: [601] 带格式的 | User | 2018/6/30 17:02:00 |
|------------------|------|--------------------|

无下划线, 字体颜色: 自动设置

|                  |      |                    |
|------------------|------|--------------------|
| 页 63: [602] 带格式的 | User | 2018/6/30 17:02:00 |
|------------------|------|--------------------|

无下划线, 字体颜色: 自动设置

|                  |      |                    |
|------------------|------|--------------------|
| 页 63: [602] 带格式的 | User | 2018/6/30 17:02:00 |
|------------------|------|--------------------|

无下划线, 字体颜色: 自动设置

|                  |      |                    |
|------------------|------|--------------------|
| 页 63: [603] 带格式的 | User | 2018/6/30 17:02:00 |
|------------------|------|--------------------|

无下划线, 字体颜色: 自动设置

|                  |      |                    |
|------------------|------|--------------------|
| 页 63: [603] 带格式的 | User | 2018/6/30 17:02:00 |
|------------------|------|--------------------|

无下划线, 字体颜色: 自动设置

|                  |      |                    |
|------------------|------|--------------------|
| 页 63: [604] 带格式的 | User | 2018/6/30 17:02:00 |
|------------------|------|--------------------|

无下划线, 字体颜色: 自动设置

|                  |      |                    |
|------------------|------|--------------------|
| 页 63: [604] 带格式的 | User | 2018/6/30 17:02:00 |
|------------------|------|--------------------|

无下划线, 字体颜色: 自动设置

|                  |      |                    |
|------------------|------|--------------------|
| 页 63: [605] 带格式的 | User | 2018/6/30 17:02:00 |
|------------------|------|--------------------|

无下划线, 字体颜色: 自动设置

|                  |      |                    |
|------------------|------|--------------------|
| 页 63: [605] 带格式的 | User | 2018/6/30 17:02:00 |
|------------------|------|--------------------|

无下划线, 字体颜色: 自动设置

|                  |      |                    |
|------------------|------|--------------------|
| 页 63: [606] 带格式的 | User | 2018/6/30 17:02:00 |
|------------------|------|--------------------|

无下划线, 字体颜色: 自动设置

|                  |      |                    |
|------------------|------|--------------------|
| 页 63: [607] 带格式的 | User | 2018/6/30 17:15:00 |
|------------------|------|--------------------|

定义网格后不调整右缩进, 不对齐到网格

|                  |      |                    |
|------------------|------|--------------------|
| 页 63: [608] 带格式的 | User | 2018/6/30 17:02:00 |
|------------------|------|--------------------|

无下划线, 字体颜色: 自动设置

|                  |      |                    |
|------------------|------|--------------------|
| 页 63: [608] 带格式的 | User | 2018/6/30 17:02:00 |
|------------------|------|--------------------|

无下划线, 字体颜色: 自动设置

|                  |      |                    |
|------------------|------|--------------------|
| 页 63: [609] 带格式的 | User | 2018/6/30 17:02:00 |
|------------------|------|--------------------|

无下划线, 字体颜色: 自动设置

|                  |      |                    |
|------------------|------|--------------------|
| 页 63: [609] 带格式的 | User | 2018/6/30 17:02:00 |
|------------------|------|--------------------|

无下划线, 字体颜色: 自动设置

|                  |      |                    |
|------------------|------|--------------------|
| 页 63: [610] 带格式的 | User | 2018/6/30 17:02:00 |
|------------------|------|--------------------|

无下划线, 字体颜色: 自动设置

|                  |      |                    |
|------------------|------|--------------------|
| 页 63: [610] 带格式的 | User | 2018/6/30 17:02:00 |
|------------------|------|--------------------|

无下划线, 字体颜色: 自动设置

|                  |      |                    |
|------------------|------|--------------------|
| 页 63: [611] 带格式的 | User | 2018/6/30 17:02:00 |
|------------------|------|--------------------|

无下划线, 字体颜色: 自动设置

|                  |      |                    |
|------------------|------|--------------------|
| 页 63: [611] 带格式的 | User | 2018/6/30 17:02:00 |
|------------------|------|--------------------|

无下划线, 字体颜色: 自动设置

|                  |      |                    |
|------------------|------|--------------------|
| 页 63: [612] 带格式的 | User | 2018/6/30 17:02:00 |
|------------------|------|--------------------|

无下划线, 字体颜色: 自动设置

|                  |      |                    |
|------------------|------|--------------------|
| 页 63: [612] 带格式的 | User | 2018/6/30 17:02:00 |
|------------------|------|--------------------|

无下划线, 字体颜色: 自动设置

|                  |      |                    |
|------------------|------|--------------------|
| 页 63: [613] 带格式的 | User | 2018/6/30 17:02:00 |
|------------------|------|--------------------|

无下划线, 字体颜色: 自动设置

|                  |      |                    |
|------------------|------|--------------------|
| 页 63: [613] 带格式的 | User | 2018/6/30 17:02:00 |
|------------------|------|--------------------|

无下划线, 字体颜色: 自动设置

|                  |      |                    |
|------------------|------|--------------------|
| 页 63: [614] 带格式的 | User | 2018/6/30 17:02:00 |
|------------------|------|--------------------|

无下划线, 字体颜色: 自动设置

|                  |      |                    |
|------------------|------|--------------------|
| 页 63: [614] 带格式的 | User | 2018/6/30 17:02:00 |
|------------------|------|--------------------|

无下划线, 字体颜色: 自动设置

|                  |      |                    |
|------------------|------|--------------------|
| 页 63: [615] 带格式的 | User | 2018/6/30 17:02:00 |
|------------------|------|--------------------|

无下划线, 字体颜色: 自动设置

|                  |      |                    |
|------------------|------|--------------------|
| 页 63: [615] 带格式的 | User | 2018/6/30 17:02:00 |
|------------------|------|--------------------|

无下划线, 字体颜色: 自动设置

|                  |      |                    |
|------------------|------|--------------------|
| 页 63: [616] 带格式的 | User | 2018/6/30 17:02:00 |
|------------------|------|--------------------|

无下划线, 字体颜色: 自动设置

|                  |      |                    |
|------------------|------|--------------------|
| 页 63: [616] 带格式的 | User | 2018/6/30 17:02:00 |
|------------------|------|--------------------|

无下划线, 字体颜色: 自动设置

|                  |      |                    |
|------------------|------|--------------------|
| 页 63: [617] 带格式的 | User | 2018/6/30 17:02:00 |
|------------------|------|--------------------|

无下划线, 字体颜色: 自动设置

|                  |      |                    |
|------------------|------|--------------------|
| 页 63: [617] 带格式的 | User | 2018/6/30 17:02:00 |
|------------------|------|--------------------|

无下划线, 字体颜色: 自动设置

|                  |      |                    |
|------------------|------|--------------------|
| 页 63: [618] 带格式的 | User | 2018/6/30 17:02:00 |
|------------------|------|--------------------|

无下划线, 字体颜色: 自动设置

|                  |      |                    |
|------------------|------|--------------------|
| 页 63: [618] 带格式的 | User | 2018/6/30 17:02:00 |
|------------------|------|--------------------|

无下划线, 字体颜色: 自动设置

|                  |      |                    |
|------------------|------|--------------------|
| 页 63: [619] 带格式的 | User | 2018/6/30 17:02:00 |
|------------------|------|--------------------|

无下划线, 字体颜色: 自动设置

|                  |      |                    |
|------------------|------|--------------------|
| 页 63: [619] 带格式的 | User | 2018/6/30 17:02:00 |
|------------------|------|--------------------|

无下划线, 字体颜色: 自动设置

|                  |      |                    |
|------------------|------|--------------------|
| 页 63: [620] 带格式的 | User | 2018/6/30 17:02:00 |
|------------------|------|--------------------|

无下划线, 字体颜色: 自动设置

|                  |      |                    |
|------------------|------|--------------------|
| 页 63: [620] 带格式的 | User | 2018/6/30 17:02:00 |
|------------------|------|--------------------|

无下划线, 字体颜色: 自动设置

|                  |      |                    |
|------------------|------|--------------------|
| 页 63: [621] 带格式的 | User | 2018/6/30 17:02:00 |
|------------------|------|--------------------|

无下划线, 字体颜色: 自动设置

|                  |      |                    |
|------------------|------|--------------------|
| 页 63: [622] 带格式的 | User | 2018/6/30 17:15:00 |
|------------------|------|--------------------|

定义网格后不调整右缩进, 不对齐到网格

|                  |      |                    |
|------------------|------|--------------------|
| 页 63: [623] 带格式的 | User | 2018/6/30 17:02:00 |
|------------------|------|--------------------|

无下划线, 字体颜色: 自动设置

|                  |      |                    |
|------------------|------|--------------------|
| 页 63: [623] 带格式的 | User | 2018/6/30 17:02:00 |
|------------------|------|--------------------|

无下划线, 字体颜色: 自动设置

|                  |      |                    |
|------------------|------|--------------------|
| 页 63: [624] 带格式的 | User | 2018/6/30 17:02:00 |
|------------------|------|--------------------|

无下划线, 字体颜色: 自动设置

|                  |      |                    |
|------------------|------|--------------------|
| 页 63: [624] 带格式的 | User | 2018/6/30 17:02:00 |
|------------------|------|--------------------|

无下划线, 字体颜色: 自动设置

|                  |      |                    |
|------------------|------|--------------------|
| 页 63: [625] 带格式的 | User | 2018/6/30 17:02:00 |
|------------------|------|--------------------|

无下划线, 字体颜色: 自动设置

|                  |      |                    |
|------------------|------|--------------------|
| 页 63: [625] 带格式的 | User | 2018/6/30 17:02:00 |
|------------------|------|--------------------|

无下划线, 字体颜色: 自动设置

|                  |      |                    |
|------------------|------|--------------------|
| 页 63: [626] 带格式的 | User | 2018/6/30 17:02:00 |
|------------------|------|--------------------|

无下划线, 字体颜色: 自动设置

|                  |      |                    |
|------------------|------|--------------------|
| 页 63: [626] 带格式的 | User | 2018/6/30 17:02:00 |
|------------------|------|--------------------|

无下划线, 字体颜色: 自动设置

|                  |      |                    |
|------------------|------|--------------------|
| 页 63: [627] 带格式的 | User | 2018/6/30 17:02:00 |
|------------------|------|--------------------|

无下划线, 字体颜色: 自动设置

|                  |      |                    |
|------------------|------|--------------------|
| 页 63: [627] 带格式的 | User | 2018/6/30 17:02:00 |
|------------------|------|--------------------|

无下划线, 字体颜色: 自动设置

|                  |      |                    |
|------------------|------|--------------------|
| 页 63: [628] 带格式的 | User | 2018/6/30 17:02:00 |
|------------------|------|--------------------|

无下划线, 字体颜色: 自动设置

|                  |      |                    |
|------------------|------|--------------------|
| 页 63: [628] 带格式的 | User | 2018/6/30 17:02:00 |
|------------------|------|--------------------|

无下划线, 字体颜色: 自动设置

|                  |      |                    |
|------------------|------|--------------------|
| 页 63: [629] 带格式的 | User | 2018/6/30 17:02:00 |
|------------------|------|--------------------|

无下划线, 字体颜色: 自动设置

|                  |      |                    |
|------------------|------|--------------------|
| 页 63: [629] 带格式的 | User | 2018/6/30 17:02:00 |
|------------------|------|--------------------|

无下划线, 字体颜色: 自动设置

|                  |      |                    |
|------------------|------|--------------------|
| 页 63: [630] 带格式的 | User | 2018/6/30 17:02:00 |
|------------------|------|--------------------|

无下划线, 字体颜色: 自动设置

|                  |      |                    |
|------------------|------|--------------------|
| 页 63: [630] 带格式的 | User | 2018/6/30 17:02:00 |
|------------------|------|--------------------|

无下划线, 字体颜色: 自动设置

|                  |      |                    |
|------------------|------|--------------------|
| 页 63: [631] 带格式的 | User | 2018/6/30 17:02:00 |
|------------------|------|--------------------|

无下划线, 字体颜色: 自动设置

|                  |      |                    |
|------------------|------|--------------------|
| 页 63: [631] 带格式的 | User | 2018/6/30 17:02:00 |
|------------------|------|--------------------|

无下划线, 字体颜色: 自动设置

|                  |      |                    |
|------------------|------|--------------------|
| 页 63: [632] 带格式的 | User | 2018/6/30 17:02:00 |
|------------------|------|--------------------|

无下划线, 字体颜色: 自动设置

|                  |      |                    |
|------------------|------|--------------------|
| 页 63: [632] 带格式的 | User | 2018/6/30 17:02:00 |
|------------------|------|--------------------|

无下划线, 字体颜色: 自动设置

|                  |      |                    |
|------------------|------|--------------------|
| 页 63: [633] 带格式的 | User | 2018/6/30 17:02:00 |
|------------------|------|--------------------|

无下划线, 字体颜色: 自动设置

|                  |      |                    |
|------------------|------|--------------------|
| 页 63: [633] 带格式的 | User | 2018/6/30 17:02:00 |
|------------------|------|--------------------|

无下划线, 字体颜色: 自动设置

|                  |      |                    |
|------------------|------|--------------------|
| 页 63: [634] 带格式的 | User | 2018/6/30 17:02:00 |
|------------------|------|--------------------|

无下划线, 字体颜色: 自动设置

|                  |      |                    |
|------------------|------|--------------------|
| 页 63: [634] 带格式的 | User | 2018/6/30 17:02:00 |
|------------------|------|--------------------|

无下划线, 字体颜色: 自动设置

|                  |      |                    |
|------------------|------|--------------------|
| 页 63: [635] 带格式的 | User | 2018/6/30 17:02:00 |
|------------------|------|--------------------|

无下划线, 字体颜色: 自动设置

|                  |      |                    |
|------------------|------|--------------------|
| 页 63: [635] 带格式的 | User | 2018/6/30 17:02:00 |
|------------------|------|--------------------|

无下划线, 字体颜色: 自动设置

|                  |      |                    |
|------------------|------|--------------------|
| 页 63: [636] 带格式的 | User | 2018/6/30 17:02:00 |
|------------------|------|--------------------|

无下划线, 字体颜色: 自动设置

|                  |      |                    |
|------------------|------|--------------------|
| 页 63: [637] 带格式的 | User | 2018/6/30 17:15:00 |
|------------------|------|--------------------|

定义网格后不调整右缩进, 不对齐到网格

|                  |      |                    |
|------------------|------|--------------------|
| 页 63: [638] 带格式的 | User | 2018/6/30 17:02:00 |
|------------------|------|--------------------|

无下划线, 字体颜色: 自动设置

|                  |      |                    |
|------------------|------|--------------------|
| 页 63: [638] 带格式的 | User | 2018/6/30 17:02:00 |
|------------------|------|--------------------|

无下划线, 字体颜色: 自动设置

|                  |      |                    |
|------------------|------|--------------------|
| 页 63: [639] 带格式的 | User | 2018/6/30 17:02:00 |
|------------------|------|--------------------|

无下划线, 字体颜色: 自动设置

|                  |      |                    |
|------------------|------|--------------------|
| 页 63: [639] 带格式的 | User | 2018/6/30 17:02:00 |
|------------------|------|--------------------|

无下划线, 字体颜色: 自动设置

|                  |      |                    |
|------------------|------|--------------------|
| 页 63: [640] 带格式的 | User | 2018/6/30 17:02:00 |
|------------------|------|--------------------|

无下划线, 字体颜色: 自动设置

|                  |      |                    |
|------------------|------|--------------------|
| 页 63: [640] 带格式的 | User | 2018/6/30 17:02:00 |
|------------------|------|--------------------|

无下划线, 字体颜色: 自动设置

|                  |      |                    |
|------------------|------|--------------------|
| 页 63: [641] 带格式的 | User | 2018/6/30 17:02:00 |
|------------------|------|--------------------|

无下划线, 字体颜色: 自动设置

|                  |      |                    |
|------------------|------|--------------------|
| 页 63: [641] 带格式的 | User | 2018/6/30 17:02:00 |
|------------------|------|--------------------|

无下划线, 字体颜色: 自动设置

|                  |      |                    |
|------------------|------|--------------------|
| 页 63: [642] 带格式的 | User | 2018/6/30 17:02:00 |
|------------------|------|--------------------|

无下划线, 字体颜色: 自动设置

|                  |      |                    |
|------------------|------|--------------------|
| 页 63: [642] 带格式的 | User | 2018/6/30 17:02:00 |
|------------------|------|--------------------|

无下划线, 字体颜色: 自动设置

|                  |      |                    |
|------------------|------|--------------------|
| 页 63: [643] 带格式的 | User | 2018/6/30 17:02:00 |
|------------------|------|--------------------|

无下划线, 字体颜色: 自动设置

|                  |      |                    |
|------------------|------|--------------------|
| 页 63: [643] 带格式的 | User | 2018/6/30 17:02:00 |
|------------------|------|--------------------|

无下划线, 字体颜色: 自动设置

|                  |      |                    |
|------------------|------|--------------------|
| 页 63: [644] 带格式的 | User | 2018/6/30 17:02:00 |
|------------------|------|--------------------|

无下划线, 字体颜色: 自动设置

|                  |      |                    |
|------------------|------|--------------------|
| 页 63: [644] 带格式的 | User | 2018/6/30 17:02:00 |
|------------------|------|--------------------|

无下划线, 字体颜色: 自动设置

|                  |      |                    |
|------------------|------|--------------------|
| 页 63: [645] 带格式的 | User | 2018/6/30 17:02:00 |
|------------------|------|--------------------|

无下划线, 字体颜色: 自动设置

|                  |      |                    |
|------------------|------|--------------------|
| 页 63: [645] 带格式的 | User | 2018/6/30 17:02:00 |
|------------------|------|--------------------|

无下划线, 字体颜色: 自动设置

|                  |      |                    |
|------------------|------|--------------------|
| 页 63: [646] 带格式的 | User | 2018/6/30 17:02:00 |
|------------------|------|--------------------|

无下划线, 字体颜色: 自动设置

|                  |      |                    |
|------------------|------|--------------------|
| 页 63: [646] 带格式的 | User | 2018/6/30 17:02:00 |
|------------------|------|--------------------|

无下划线, 字体颜色: 自动设置

|                  |      |                    |
|------------------|------|--------------------|
| 页 63: [647] 带格式的 | User | 2018/6/30 17:02:00 |
|------------------|------|--------------------|

无下划线, 字体颜色: 自动设置

|                  |      |                    |
|------------------|------|--------------------|
| 页 63: [647] 带格式的 | User | 2018/6/30 17:02:00 |
|------------------|------|--------------------|

无下划线, 字体颜色: 自动设置

|                  |      |                    |
|------------------|------|--------------------|
| 页 63: [648] 带格式的 | User | 2018/6/30 17:02:00 |
|------------------|------|--------------------|

无下划线, 字体颜色: 自动设置

|                  |      |                    |
|------------------|------|--------------------|
| 页 63: [648] 带格式的 | User | 2018/6/30 17:02:00 |
|------------------|------|--------------------|

无下划线, 字体颜色: 自动设置

|                  |      |                    |
|------------------|------|--------------------|
| 页 63: [649] 带格式的 | User | 2018/6/30 17:02:00 |
|------------------|------|--------------------|

无下划线, 字体颜色: 自动设置

|                  |      |                    |
|------------------|------|--------------------|
| 页 63: [649] 带格式的 | User | 2018/6/30 17:02:00 |
|------------------|------|--------------------|

无下划线, 字体颜色: 自动设置

|                  |      |                    |
|------------------|------|--------------------|
| 页 63: [650] 带格式的 | User | 2018/6/30 17:02:00 |
|------------------|------|--------------------|

无下划线, 字体颜色: 自动设置

|                  |      |                    |
|------------------|------|--------------------|
| 页 63: [650] 带格式的 | User | 2018/6/30 17:02:00 |
|------------------|------|--------------------|

无下划线, 字体颜色: 自动设置

|                  |      |                    |
|------------------|------|--------------------|
| 页 63: [651] 带格式的 | User | 2018/6/30 17:02:00 |
|------------------|------|--------------------|

无下划线, 字体颜色: 自动设置

|                  |      |                    |
|------------------|------|--------------------|
| 页 63: [652] 带格式的 | User | 2018/6/30 17:15:00 |
|------------------|------|--------------------|

定义网格后不调整右缩进, 不对齐到网格

|                  |      |                    |
|------------------|------|--------------------|
| 页 63: [653] 带格式的 | User | 2018/6/30 17:02:00 |
|------------------|------|--------------------|

无下划线, 字体颜色: 自动设置

|                  |      |                    |
|------------------|------|--------------------|
| 页 63: [653] 带格式的 | User | 2018/6/30 17:02:00 |
|------------------|------|--------------------|

无下划线, 字体颜色: 自动设置

|                  |      |                    |
|------------------|------|--------------------|
| 页 63: [654] 带格式的 | User | 2018/6/30 17:02:00 |
|------------------|------|--------------------|

无下划线, 字体颜色: 自动设置

|                  |      |                    |
|------------------|------|--------------------|
| 页 63: [654] 带格式的 | User | 2018/6/30 17:02:00 |
|------------------|------|--------------------|

无下划线, 字体颜色: 自动设置

|                  |      |                    |
|------------------|------|--------------------|
| 页 63: [655] 带格式的 | User | 2018/6/30 17:02:00 |
|------------------|------|--------------------|

无下划线, 字体颜色: 自动设置

|                  |      |                    |
|------------------|------|--------------------|
| 页 63: [655] 带格式的 | User | 2018/6/30 17:02:00 |
|------------------|------|--------------------|

无下划线, 字体颜色: 自动设置

|                  |      |                    |
|------------------|------|--------------------|
| 页 63: [656] 带格式的 | User | 2018/6/30 17:02:00 |
|------------------|------|--------------------|

无下划线, 字体颜色: 自动设置



|                  |      |                    |
|------------------|------|--------------------|
| 页 63: [656] 带格式的 | User | 2018/6/30 17:02:00 |
|------------------|------|--------------------|

无下划线, 字体颜色: 自动设置

|                  |      |                    |
|------------------|------|--------------------|
| 页 63: [657] 带格式的 | User | 2018/6/30 17:02:00 |
|------------------|------|--------------------|

无下划线, 字体颜色: 自动设置

|                  |      |                    |
|------------------|------|--------------------|
| 页 63: [657] 带格式的 | User | 2018/6/30 17:02:00 |
|------------------|------|--------------------|

无下划线, 字体颜色: 自动设置

|                  |      |                    |
|------------------|------|--------------------|
| 页 63: [658] 带格式的 | User | 2018/6/30 17:02:00 |
|------------------|------|--------------------|

无下划线, 字体颜色: 自动设置

|                  |      |                    |
|------------------|------|--------------------|
| 页 63: [658] 带格式的 | User | 2018/6/30 17:02:00 |
|------------------|------|--------------------|

无下划线, 字体颜色: 自动设置

|                  |      |                    |
|------------------|------|--------------------|
| 页 63: [659] 带格式的 | User | 2018/6/30 17:02:00 |
|------------------|------|--------------------|

无下划线, 字体颜色: 自动设置

|                  |      |                    |
|------------------|------|--------------------|
| 页 63: [659] 带格式的 | User | 2018/6/30 17:02:00 |
|------------------|------|--------------------|

无下划线, 字体颜色: 自动设置

|                  |      |                    |
|------------------|------|--------------------|
| 页 63: [660] 带格式的 | User | 2018/6/30 17:02:00 |
|------------------|------|--------------------|

无下划线, 字体颜色: 自动设置

|                  |      |                    |
|------------------|------|--------------------|
| 页 63: [660] 带格式的 | User | 2018/6/30 17:02:00 |
|------------------|------|--------------------|

无下划线, 字体颜色: 自动设置

|                  |      |                    |
|------------------|------|--------------------|
| 页 63: [661] 带格式的 | User | 2018/6/30 17:02:00 |
|------------------|------|--------------------|

无下划线, 字体颜色: 自动设置

|                  |      |                    |
|------------------|------|--------------------|
| 页 63: [661] 带格式的 | User | 2018/6/30 17:02:00 |
|------------------|------|--------------------|

无下划线, 字体颜色: 自动设置

|                  |      |                    |
|------------------|------|--------------------|
| 页 63: [662] 带格式的 | User | 2018/6/30 17:02:00 |
|------------------|------|--------------------|

无下划线, 字体颜色: 自动设置

|                  |      |                    |
|------------------|------|--------------------|
| 页 63: [662] 带格式的 | User | 2018/6/30 17:02:00 |
|------------------|------|--------------------|

无下划线, 字体颜色: 自动设置

|                  |      |                    |
|------------------|------|--------------------|
| 页 63: [663] 带格式的 | User | 2018/6/30 17:02:00 |
|------------------|------|--------------------|

无下划线, 字体颜色: 自动设置

|                  |      |                    |
|------------------|------|--------------------|
| 页 63: [663] 带格式的 | User | 2018/6/30 17:02:00 |
|------------------|------|--------------------|

无下划线, 字体颜色: 自动设置

|                  |      |                    |
|------------------|------|--------------------|
| 页 63: [664] 带格式的 | User | 2018/6/30 17:02:00 |
|------------------|------|--------------------|

无下划线, 字体颜色: 自动设置

|                  |      |                    |
|------------------|------|--------------------|
| 页 63: [664] 带格式的 | User | 2018/6/30 17:02:00 |
|------------------|------|--------------------|

无下划线, 字体颜色: 自动设置

|                  |      |                    |
|------------------|------|--------------------|
| 页 63: [665] 带格式的 | User | 2018/6/30 17:02:00 |
|------------------|------|--------------------|

无下划线, 字体颜色: 自动设置

|                  |      |                    |
|------------------|------|--------------------|
| 页 63: [665] 带格式的 | User | 2018/6/30 17:02:00 |
|------------------|------|--------------------|

无下划线, 字体颜色: 自动设置

|                  |      |                    |
|------------------|------|--------------------|
| 页 63: [666] 带格式的 | User | 2018/6/30 17:02:00 |
|------------------|------|--------------------|

无下划线, 字体颜色: 自动设置

|                  |      |                    |
|------------------|------|--------------------|
| 页 63: [667] 带格式的 | User | 2018/6/30 17:15:00 |
|------------------|------|--------------------|

定义网格后不调整右缩进, 不对齐到网格

|                  |      |                    |
|------------------|------|--------------------|
| 页 63: [668] 带格式的 | User | 2018/6/30 17:02:00 |
|------------------|------|--------------------|

无下划线, 字体颜色: 自动设置

|                  |      |                    |
|------------------|------|--------------------|
| 页 63: [668] 带格式的 | User | 2018/6/30 17:02:00 |
|------------------|------|--------------------|

无下划线, 字体颜色: 自动设置

|                  |      |                    |
|------------------|------|--------------------|
| 页 63: [669] 带格式的 | User | 2018/6/30 17:02:00 |
|------------------|------|--------------------|

无下划线, 字体颜色: 自动设置

|                  |      |                    |
|------------------|------|--------------------|
| 页 63: [669] 带格式的 | User | 2018/6/30 17:02:00 |
|------------------|------|--------------------|

无下划线, 字体颜色: 自动设置

|                  |      |                    |
|------------------|------|--------------------|
| 页 63: [670] 带格式的 | User | 2018/6/30 17:02:00 |
|------------------|------|--------------------|

无下划线, 字体颜色: 自动设置

|                  |      |                    |
|------------------|------|--------------------|
| 页 63: [670] 带格式的 | User | 2018/6/30 17:02:00 |
|------------------|------|--------------------|

无下划线, 字体颜色: 自动设置

|                  |      |                    |
|------------------|------|--------------------|
| 页 63: [671] 带格式的 | User | 2018/6/30 17:02:00 |
|------------------|------|--------------------|

无下划线, 字体颜色: 自动设置

|                  |      |                    |
|------------------|------|--------------------|
| 页 63: [671] 带格式的 | User | 2018/6/30 17:02:00 |
|------------------|------|--------------------|

无下划线, 字体颜色: 自动设置

|                  |      |                    |
|------------------|------|--------------------|
| 页 63: [672] 带格式的 | User | 2018/6/30 17:02:00 |
|------------------|------|--------------------|

无下划线, 字体颜色: 自动设置

|                  |      |                    |
|------------------|------|--------------------|
| 页 63: [672] 带格式的 | User | 2018/6/30 17:02:00 |
|------------------|------|--------------------|

无下划线, 字体颜色: 自动设置

|                  |      |                    |
|------------------|------|--------------------|
| 页 63: [673] 带格式的 | User | 2018/6/30 17:02:00 |
|------------------|------|--------------------|

无下划线, 字体颜色: 自动设置

|                  |      |                    |
|------------------|------|--------------------|
| 页 63: [673] 带格式的 | User | 2018/6/30 17:02:00 |
|------------------|------|--------------------|

无下划线, 字体颜色: 自动设置

|                  |      |                    |
|------------------|------|--------------------|
| 页 63: [674] 带格式的 | User | 2018/6/30 17:02:00 |
|------------------|------|--------------------|

无下划线, 字体颜色: 自动设置

|                  |      |                    |
|------------------|------|--------------------|
| 页 63: [674] 带格式的 | User | 2018/6/30 17:02:00 |
|------------------|------|--------------------|

无下划线, 字体颜色: 自动设置

|                  |      |                    |
|------------------|------|--------------------|
| 页 63: [675] 带格式的 | User | 2018/6/30 17:02:00 |
|------------------|------|--------------------|

无下划线, 字体颜色: 自动设置

|                  |      |                    |
|------------------|------|--------------------|
| 页 63: [675] 带格式的 | User | 2018/6/30 17:02:00 |
|------------------|------|--------------------|

无下划线, 字体颜色: 自动设置

|                  |      |                    |
|------------------|------|--------------------|
| 页 63: [676] 带格式的 | User | 2018/6/30 17:02:00 |
|------------------|------|--------------------|

无下划线, 字体颜色: 自动设置

|                  |      |                    |
|------------------|------|--------------------|
| 页 63: [676] 带格式的 | User | 2018/6/30 17:02:00 |
|------------------|------|--------------------|

无下划线, 字体颜色: 自动设置

|                  |      |                    |
|------------------|------|--------------------|
| 页 63: [677] 带格式的 | User | 2018/6/30 17:02:00 |
|------------------|------|--------------------|

无下划线, 字体颜色: 自动设置

|                  |      |                    |
|------------------|------|--------------------|
| 页 63: [677] 带格式的 | User | 2018/6/30 17:02:00 |
|------------------|------|--------------------|

无下划线, 字体颜色: 自动设置

|                  |      |                    |
|------------------|------|--------------------|
| 页 63: [678] 带格式的 | User | 2018/6/30 17:02:00 |
|------------------|------|--------------------|

无下划线, 字体颜色: 自动设置

|                  |      |                    |
|------------------|------|--------------------|
| 页 63: [678] 带格式的 | User | 2018/6/30 17:02:00 |
|------------------|------|--------------------|

无下划线, 字体颜色: 自动设置

|                  |      |                    |
|------------------|------|--------------------|
| 页 63: [679] 带格式的 | User | 2018/6/30 17:02:00 |
|------------------|------|--------------------|

无下划线, 字体颜色: 自动设置

|                  |      |                    |
|------------------|------|--------------------|
| 页 63: [679] 带格式的 | User | 2018/6/30 17:02:00 |
|------------------|------|--------------------|

无下划线, 字体颜色: 自动设置

|                  |      |                    |
|------------------|------|--------------------|
| 页 63: [680] 带格式的 | User | 2018/6/30 17:02:00 |
|------------------|------|--------------------|

无下划线, 字体颜色: 自动设置

|                  |      |                    |
|------------------|------|--------------------|
| 页 63: [680] 带格式的 | User | 2018/6/30 17:02:00 |
|------------------|------|--------------------|

无下划线, 字体颜色: 自动设置

|                  |      |                    |
|------------------|------|--------------------|
| 页 63: [681] 带格式的 | User | 2018/6/30 17:02:00 |
|------------------|------|--------------------|

无下划线, 字体颜色: 自动设置

|                  |      |                    |
|------------------|------|--------------------|
| 页 63: [682] 带格式的 | User | 2018/6/30 17:15:00 |
|------------------|------|--------------------|

定义网格后不调整右缩进, 不对齐到网格

|                  |      |                    |
|------------------|------|--------------------|
| 页 63: [683] 带格式的 | User | 2018/6/30 17:02:00 |
|------------------|------|--------------------|

无下划线, 字体颜色: 自动设置

|                  |      |                    |
|------------------|------|--------------------|
| 页 63: [683] 带格式的 | User | 2018/6/30 17:02:00 |
|------------------|------|--------------------|

无下划线, 字体颜色: 自动设置

|                  |      |                    |
|------------------|------|--------------------|
| 页 63: [684] 带格式的 | User | 2018/6/30 17:02:00 |
|------------------|------|--------------------|

无下划线, 字体颜色: 自动设置

|                  |      |                    |
|------------------|------|--------------------|
| 页 63: [684] 带格式的 | User | 2018/6/30 17:02:00 |
|------------------|------|--------------------|

无下划线, 字体颜色: 自动设置

|                  |      |                    |
|------------------|------|--------------------|
| 页 63: [685] 带格式的 | User | 2018/6/30 17:02:00 |
|------------------|------|--------------------|

无下划线, 字体颜色: 自动设置

|                  |      |                    |
|------------------|------|--------------------|
| 页 63: [685] 带格式的 | User | 2018/6/30 17:02:00 |
|------------------|------|--------------------|

无下划线, 字体颜色: 自动设置

|                  |      |                    |
|------------------|------|--------------------|
| 页 63: [686] 带格式的 | User | 2018/6/30 17:02:00 |
|------------------|------|--------------------|

无下划线, 字体颜色: 自动设置

|                  |      |                    |
|------------------|------|--------------------|
| 页 63: [686] 带格式的 | User | 2018/6/30 17:02:00 |
|------------------|------|--------------------|

无下划线, 字体颜色: 自动设置

|                  |      |                    |
|------------------|------|--------------------|
| 页 63: [687] 带格式的 | User | 2018/6/30 17:02:00 |
|------------------|------|--------------------|

无下划线, 字体颜色: 自动设置

|                  |      |                    |
|------------------|------|--------------------|
| 页 63: [687] 带格式的 | User | 2018/6/30 17:02:00 |
|------------------|------|--------------------|

无下划线, 字体颜色: 自动设置

|                  |      |                    |
|------------------|------|--------------------|
| 页 63: [688] 带格式的 | User | 2018/6/30 17:02:00 |
|------------------|------|--------------------|

无下划线, 字体颜色: 自动设置

|                  |      |                    |
|------------------|------|--------------------|
| 页 63: [688] 带格式的 | User | 2018/6/30 17:02:00 |
|------------------|------|--------------------|

无下划线, 字体颜色: 自动设置

|                  |      |                    |
|------------------|------|--------------------|
| 页 63: [689] 带格式的 | User | 2018/6/30 17:02:00 |
|------------------|------|--------------------|

无下划线, 字体颜色: 自动设置

|                  |      |                    |
|------------------|------|--------------------|
| 页 63: [689] 带格式的 | User | 2018/6/30 17:02:00 |
|------------------|------|--------------------|

无下划线, 字体颜色: 自动设置

|                  |      |                    |
|------------------|------|--------------------|
| 页 63: [690] 带格式的 | User | 2018/6/30 17:02:00 |
|------------------|------|--------------------|

无下划线, 字体颜色: 自动设置

|                  |      |                    |
|------------------|------|--------------------|
| 页 63: [690] 带格式的 | User | 2018/6/30 17:02:00 |
|------------------|------|--------------------|

无下划线, 字体颜色: 自动设置

|                  |      |                    |
|------------------|------|--------------------|
| 页 63: [691] 带格式的 | User | 2018/6/30 17:02:00 |
|------------------|------|--------------------|

无下划线, 字体颜色: 自动设置

|                  |      |                    |
|------------------|------|--------------------|
| 页 63: [691] 带格式的 | User | 2018/6/30 17:02:00 |
|------------------|------|--------------------|

无下划线, 字体颜色: 自动设置

|                  |      |                    |
|------------------|------|--------------------|
| 页 63: [692] 带格式的 | User | 2018/6/30 17:02:00 |
|------------------|------|--------------------|

无下划线, 字体颜色: 自动设置

|                  |      |                    |
|------------------|------|--------------------|
| 页 63: [692] 带格式的 | User | 2018/6/30 17:02:00 |
|------------------|------|--------------------|

无下划线, 字体颜色: 自动设置

|                  |      |                    |
|------------------|------|--------------------|
| 页 63: [693] 带格式的 | User | 2018/6/30 17:02:00 |
|------------------|------|--------------------|

无下划线, 字体颜色: 自动设置

|                  |      |                    |
|------------------|------|--------------------|
| 页 63: [693] 带格式的 | User | 2018/6/30 17:02:00 |
|------------------|------|--------------------|

无下划线, 字体颜色: 自动设置

|                  |      |                    |
|------------------|------|--------------------|
| 页 63: [694] 带格式的 | User | 2018/6/30 17:02:00 |
|------------------|------|--------------------|

无下划线, 字体颜色: 自动设置

|                  |      |                    |
|------------------|------|--------------------|
| 页 63: [694] 带格式的 | User | 2018/6/30 17:02:00 |
|------------------|------|--------------------|

无下划线, 字体颜色: 自动设置

|                  |      |                    |
|------------------|------|--------------------|
| 页 63: [695] 带格式的 | User | 2018/6/30 17:02:00 |
|------------------|------|--------------------|

无下划线, 字体颜色: 自动设置

|                  |      |                    |
|------------------|------|--------------------|
| 页 63: [695] 带格式的 | User | 2018/6/30 17:02:00 |
|------------------|------|--------------------|

无下划线, 字体颜色: 自动设置

|                  |      |                    |
|------------------|------|--------------------|
| 页 63: [696] 带格式的 | User | 2018/6/30 17:02:00 |
|------------------|------|--------------------|

无下划线, 字体颜色: 自动设置

|                  |      |                    |
|------------------|------|--------------------|
| 页 63: [697] 带格式的 | User | 2018/6/30 17:15:00 |
|------------------|------|--------------------|

定义网格后不调整右缩进, 不对齐到网格

|                  |      |                    |
|------------------|------|--------------------|
| 页 63: [698] 带格式的 | User | 2018/6/30 17:02:00 |
|------------------|------|--------------------|

无下划线, 字体颜色: 自动设置

|                  |      |                    |
|------------------|------|--------------------|
| 页 63: [698] 带格式的 | User | 2018/6/30 17:02:00 |
|------------------|------|--------------------|

无下划线, 字体颜色: 自动设置

|                  |      |                    |
|------------------|------|--------------------|
| 页 63: [699] 带格式的 | User | 2018/6/30 17:02:00 |
|------------------|------|--------------------|

无下划线, 字体颜色: 自动设置

|                  |      |                    |
|------------------|------|--------------------|
| 页 63: [699] 带格式的 | User | 2018/6/30 17:02:00 |
|------------------|------|--------------------|

无下划线, 字体颜色: 自动设置

|                  |      |                    |
|------------------|------|--------------------|
| 页 63: [700] 带格式的 | User | 2018/6/30 17:02:00 |
|------------------|------|--------------------|

无下划线, 字体颜色: 自动设置

|                  |      |                    |
|------------------|------|--------------------|
| 页 63: [700] 带格式的 | User | 2018/6/30 17:02:00 |
|------------------|------|--------------------|

无下划线, 字体颜色: 自动设置

|                  |      |                    |
|------------------|------|--------------------|
| 页 63: [701] 带格式的 | User | 2018/6/30 17:02:00 |
|------------------|------|--------------------|

无下划线, 字体颜色: 自动设置

|                  |      |                    |
|------------------|------|--------------------|
| 页 63: [701] 带格式的 | User | 2018/6/30 17:02:00 |
|------------------|------|--------------------|

无下划线, 字体颜色: 自动设置

|                  |      |                    |
|------------------|------|--------------------|
| 页 63: [702] 带格式的 | User | 2018/6/30 17:02:00 |
|------------------|------|--------------------|

无下划线, 字体颜色: 自动设置

|                  |      |                    |
|------------------|------|--------------------|
| 页 63: [702] 带格式的 | User | 2018/6/30 17:02:00 |
|------------------|------|--------------------|

无下划线, 字体颜色: 自动设置

|                  |      |                    |
|------------------|------|--------------------|
| 页 63: [703] 带格式的 | User | 2018/6/30 17:02:00 |
|------------------|------|--------------------|

无下划线, 字体颜色: 自动设置

|                  |      |                    |
|------------------|------|--------------------|
| 页 63: [703] 带格式的 | User | 2018/6/30 17:02:00 |
|------------------|------|--------------------|

无下划线, 字体颜色: 自动设置

|                  |      |                    |
|------------------|------|--------------------|
| 页 63: [704] 带格式的 | User | 2018/6/30 17:02:00 |
|------------------|------|--------------------|

无下划线, 字体颜色: 自动设置

|                  |      |                    |
|------------------|------|--------------------|
| 页 63: [704] 带格式的 | User | 2018/6/30 17:02:00 |
|------------------|------|--------------------|

无下划线, 字体颜色: 自动设置

|                  |      |                    |
|------------------|------|--------------------|
| 页 63: [705] 带格式的 | User | 2018/6/30 17:02:00 |
|------------------|------|--------------------|

无下划线, 字体颜色: 自动设置

|                  |      |                    |
|------------------|------|--------------------|
| 页 63: [705] 带格式的 | User | 2018/6/30 17:02:00 |
|------------------|------|--------------------|

无下划线, 字体颜色: 自动设置

|                  |      |                    |
|------------------|------|--------------------|
| 页 63: [706] 带格式的 | User | 2018/6/30 17:02:00 |
|------------------|------|--------------------|

无下划线, 字体颜色: 自动设置

|                  |      |                    |
|------------------|------|--------------------|
| 页 63: [706] 带格式的 | User | 2018/6/30 17:02:00 |
|------------------|------|--------------------|

无下划线, 字体颜色: 自动设置

|                  |      |                    |
|------------------|------|--------------------|
| 页 63: [707] 带格式的 | User | 2018/6/30 17:02:00 |
|------------------|------|--------------------|

无下划线, 字体颜色: 自动设置

|                  |      |                    |
|------------------|------|--------------------|
| 页 63: [707] 带格式的 | User | 2018/6/30 17:02:00 |
|------------------|------|--------------------|

无下划线, 字体颜色: 自动设置

|                  |      |                    |
|------------------|------|--------------------|
| 页 63: [708] 带格式的 | User | 2018/6/30 17:02:00 |
|------------------|------|--------------------|

无下划线, 字体颜色: 自动设置

|                  |      |                    |
|------------------|------|--------------------|
| 页 63: [708] 带格式的 | User | 2018/6/30 17:02:00 |
|------------------|------|--------------------|

无下划线, 字体颜色: 自动设置

|                  |      |                    |
|------------------|------|--------------------|
| 页 63: [709] 带格式的 | User | 2018/6/30 17:02:00 |
|------------------|------|--------------------|

无下划线, 字体颜色: 自动设置

|                  |      |                    |
|------------------|------|--------------------|
| 页 63: [709] 带格式的 | User | 2018/6/30 17:02:00 |
|------------------|------|--------------------|

无下划线, 字体颜色: 自动设置

|                  |      |                    |
|------------------|------|--------------------|
| 页 63: [710] 带格式的 | User | 2018/6/30 17:02:00 |
|------------------|------|--------------------|

无下划线, 字体颜色: 自动设置

|                  |      |                    |
|------------------|------|--------------------|
| 页 63: [710] 带格式的 | User | 2018/6/30 17:02:00 |
|------------------|------|--------------------|

无下划线, 字体颜色: 自动设置

|                  |      |                    |
|------------------|------|--------------------|
| 页 63: [711] 带格式的 | User | 2018/6/30 17:02:00 |
|------------------|------|--------------------|

无下划线, 字体颜色: 自动设置

|                  |      |                    |
|------------------|------|--------------------|
| 页 63: [712] 带格式的 | User | 2018/6/30 17:15:00 |
|------------------|------|--------------------|

定义网格后不调整右缩进, 不对齐到网格

|                  |      |                    |
|------------------|------|--------------------|
| 页 63: [713] 带格式的 | User | 2018/6/30 17:02:00 |
|------------------|------|--------------------|

无下划线, 字体颜色: 自动设置

|                  |      |                    |
|------------------|------|--------------------|
| 页 63: [713] 带格式的 | User | 2018/6/30 17:02:00 |
|------------------|------|--------------------|

无下划线, 字体颜色: 自动设置



|                  |      |                    |
|------------------|------|--------------------|
| 页 63: [714] 带格式的 | User | 2018/6/30 17:02:00 |
|------------------|------|--------------------|

无下划线, 字体颜色: 自动设置

|                  |      |                    |
|------------------|------|--------------------|
| 页 63: [714] 带格式的 | User | 2018/6/30 17:02:00 |
|------------------|------|--------------------|

无下划线, 字体颜色: 自动设置

|                  |      |                    |
|------------------|------|--------------------|
| 页 63: [715] 带格式的 | User | 2018/6/30 17:02:00 |
|------------------|------|--------------------|

无下划线, 字体颜色: 自动设置

|                  |      |                    |
|------------------|------|--------------------|
| 页 63: [715] 带格式的 | User | 2018/6/30 17:02:00 |
|------------------|------|--------------------|

无下划线, 字体颜色: 自动设置

|                  |      |                    |
|------------------|------|--------------------|
| 页 63: [716] 带格式的 | User | 2018/6/30 17:02:00 |
|------------------|------|--------------------|

无下划线, 字体颜色: 自动设置

|                  |      |                    |
|------------------|------|--------------------|
| 页 63: [716] 带格式的 | User | 2018/6/30 17:02:00 |
|------------------|------|--------------------|

无下划线, 字体颜色: 自动设置

|                  |      |                    |
|------------------|------|--------------------|
| 页 63: [717] 带格式的 | User | 2018/6/30 17:02:00 |
|------------------|------|--------------------|

无下划线, 字体颜色: 自动设置

|                  |      |                    |
|------------------|------|--------------------|
| 页 63: [717] 带格式的 | User | 2018/6/30 17:02:00 |
|------------------|------|--------------------|

无下划线, 字体颜色: 自动设置

|                  |      |                    |
|------------------|------|--------------------|
| 页 63: [718] 带格式的 | User | 2018/6/30 17:02:00 |
|------------------|------|--------------------|

无下划线, 字体颜色: 自动设置

|                  |      |                    |
|------------------|------|--------------------|
| 页 63: [718] 带格式的 | User | 2018/6/30 17:02:00 |
|------------------|------|--------------------|

无下划线, 字体颜色: 自动设置

|                  |      |                    |
|------------------|------|--------------------|
| 页 63: [719] 带格式的 | User | 2018/6/30 17:02:00 |
|------------------|------|--------------------|

无下划线, 字体颜色: 自动设置

|                  |      |                    |
|------------------|------|--------------------|
| 页 63: [719] 带格式的 | User | 2018/6/30 17:02:00 |
|------------------|------|--------------------|

无下划线, 字体颜色: 自动设置

|                  |      |                    |
|------------------|------|--------------------|
| 页 63: [720] 带格式的 | User | 2018/6/30 17:02:00 |
|------------------|------|--------------------|

无下划线, 字体颜色: 自动设置

|                  |      |                    |
|------------------|------|--------------------|
| 页 63: [720] 带格式的 | User | 2018/6/30 17:02:00 |
|------------------|------|--------------------|

无下划线, 字体颜色: 自动设置

|                  |      |                    |
|------------------|------|--------------------|
| 页 63: [721] 带格式的 | User | 2018/6/30 17:02:00 |
|------------------|------|--------------------|

无下划线, 字体颜色: 自动设置

|                  |      |                    |
|------------------|------|--------------------|
| 页 63: [721] 带格式的 | User | 2018/6/30 17:02:00 |
|------------------|------|--------------------|

无下划线, 字体颜色: 自动设置

|                  |      |                    |
|------------------|------|--------------------|
| 页 63: [722] 带格式的 | User | 2018/6/30 17:02:00 |
|------------------|------|--------------------|

无下划线, 字体颜色: 自动设置

|                  |      |                    |
|------------------|------|--------------------|
| 页 63: [722] 带格式的 | User | 2018/6/30 17:02:00 |
|------------------|------|--------------------|

无下划线, 字体颜色: 自动设置

|                  |      |                    |
|------------------|------|--------------------|
| 页 63: [723] 带格式的 | User | 2018/6/30 17:02:00 |
|------------------|------|--------------------|

无下划线, 字体颜色: 自动设置

|                  |      |                    |
|------------------|------|--------------------|
| 页 63: [723] 带格式的 | User | 2018/6/30 17:02:00 |
|------------------|------|--------------------|

无下划线, 字体颜色: 自动设置

|                  |      |                    |
|------------------|------|--------------------|
| 页 63: [724] 带格式的 | User | 2018/6/30 17:02:00 |
|------------------|------|--------------------|

无下划线, 字体颜色: 自动设置

|                  |      |                    |
|------------------|------|--------------------|
| 页 63: [724] 带格式的 | User | 2018/6/30 17:02:00 |
|------------------|------|--------------------|

无下划线, 字体颜色: 自动设置

|                  |      |                    |
|------------------|------|--------------------|
| 页 63: [725] 带格式的 | User | 2018/6/30 17:02:00 |
|------------------|------|--------------------|

无下划线, 字体颜色: 自动设置

|                  |      |                    |
|------------------|------|--------------------|
| 页 63: [725] 带格式的 | User | 2018/6/30 17:02:00 |
|------------------|------|--------------------|

无下划线, 字体颜色: 自动设置

|                  |      |                    |
|------------------|------|--------------------|
| 页 63: [726] 带格式的 | User | 2018/6/30 17:02:00 |
|------------------|------|--------------------|

无下划线, 字体颜色: 自动设置

|                  |      |                    |
|------------------|------|--------------------|
| 页 63: [727] 带格式的 | User | 2018/6/30 17:15:00 |
|------------------|------|--------------------|

定义网格后不调整右缩进, 不对齐到网格

|                  |      |                    |
|------------------|------|--------------------|
| 页 63: [728] 带格式的 | User | 2018/6/30 17:02:00 |
|------------------|------|--------------------|

无下划线, 字体颜色: 自动设置

|                  |      |                    |
|------------------|------|--------------------|
| 页 63: [728] 带格式的 | User | 2018/6/30 17:02:00 |
|------------------|------|--------------------|

无下划线, 字体颜色: 自动设置

|                  |      |                    |
|------------------|------|--------------------|
| 页 63: [729] 带格式的 | User | 2018/6/30 17:02:00 |
|------------------|------|--------------------|

无下划线, 字体颜色: 自动设置

|                  |      |                    |
|------------------|------|--------------------|
| 页 63: [729] 带格式的 | User | 2018/6/30 17:02:00 |
|------------------|------|--------------------|

无下划线, 字体颜色: 自动设置

|                  |      |                    |
|------------------|------|--------------------|
| 页 63: [730] 带格式的 | User | 2018/6/30 17:02:00 |
|------------------|------|--------------------|

无下划线, 字体颜色: 自动设置

|                  |      |                    |
|------------------|------|--------------------|
| 页 63: [730] 带格式的 | User | 2018/6/30 17:02:00 |
|------------------|------|--------------------|

无下划线, 字体颜色: 自动设置

|                  |      |                    |
|------------------|------|--------------------|
| 页 63: [731] 带格式的 | User | 2018/6/30 17:02:00 |
|------------------|------|--------------------|

无下划线, 字体颜色: 自动设置

|                  |      |                    |
|------------------|------|--------------------|
| 页 63: [731] 带格式的 | User | 2018/6/30 17:02:00 |
|------------------|------|--------------------|

无下划线, 字体颜色: 自动设置

|                  |      |                    |
|------------------|------|--------------------|
| 页 63: [732] 带格式的 | User | 2018/6/30 17:02:00 |
|------------------|------|--------------------|

无下划线, 字体颜色: 自动设置

|                  |      |                    |
|------------------|------|--------------------|
| 页 63: [732] 带格式的 | User | 2018/6/30 17:02:00 |
|------------------|------|--------------------|

无下划线, 字体颜色: 自动设置

|                  |      |                    |
|------------------|------|--------------------|
| 页 63: [733] 带格式的 | User | 2018/6/30 17:02:00 |
|------------------|------|--------------------|

无下划线, 字体颜色: 自动设置

|                  |      |                    |
|------------------|------|--------------------|
| 页 63: [733] 带格式的 | User | 2018/6/30 17:02:00 |
|------------------|------|--------------------|

无下划线, 字体颜色: 自动设置

|                  |      |                    |
|------------------|------|--------------------|
| 页 63: [734] 带格式的 | User | 2018/6/30 17:02:00 |
|------------------|------|--------------------|

无下划线, 字体颜色: 自动设置

|                  |      |                    |
|------------------|------|--------------------|
| 页 63: [734] 带格式的 | User | 2018/6/30 17:02:00 |
|------------------|------|--------------------|

无下划线, 字体颜色: 自动设置

|                  |      |                    |
|------------------|------|--------------------|
| 页 63: [735] 带格式的 | User | 2018/6/30 17:02:00 |
|------------------|------|--------------------|

无下划线, 字体颜色: 自动设置

|                  |      |                    |
|------------------|------|--------------------|
| 页 63: [735] 带格式的 | User | 2018/6/30 17:02:00 |
|------------------|------|--------------------|

无下划线, 字体颜色: 自动设置

|                  |      |                    |
|------------------|------|--------------------|
| 页 63: [736] 带格式的 | User | 2018/6/30 17:02:00 |
|------------------|------|--------------------|

无下划线, 字体颜色: 自动设置

|                  |      |                    |
|------------------|------|--------------------|
| 页 63: [736] 带格式的 | User | 2018/6/30 17:02:00 |
|------------------|------|--------------------|

无下划线, 字体颜色: 自动设置

|                  |      |                    |
|------------------|------|--------------------|
| 页 63: [737] 带格式的 | User | 2018/6/30 17:02:00 |
|------------------|------|--------------------|

无下划线, 字体颜色: 自动设置

|                  |      |                    |
|------------------|------|--------------------|
| 页 63: [737] 带格式的 | User | 2018/6/30 17:02:00 |
|------------------|------|--------------------|

无下划线, 字体颜色: 自动设置

|                  |      |                    |
|------------------|------|--------------------|
| 页 63: [738] 带格式的 | User | 2018/6/30 17:02:00 |
|------------------|------|--------------------|

无下划线, 字体颜色: 自动设置

|                  |      |                    |
|------------------|------|--------------------|
| 页 63: [738] 带格式的 | User | 2018/6/30 17:02:00 |
|------------------|------|--------------------|

无下划线, 字体颜色: 自动设置

|                  |      |                    |
|------------------|------|--------------------|
| 页 63: [739] 带格式的 | User | 2018/6/30 17:02:00 |
|------------------|------|--------------------|

无下划线, 字体颜色: 自动设置

|                  |      |                    |
|------------------|------|--------------------|
| 页 63: [739] 带格式的 | User | 2018/6/30 17:02:00 |
|------------------|------|--------------------|

无下划线, 字体颜色: 自动设置

|                  |      |                    |
|------------------|------|--------------------|
| 页 63: [740] 带格式的 | User | 2018/6/30 17:02:00 |
|------------------|------|--------------------|

无下划线, 字体颜色: 自动设置

|                  |      |                    |
|------------------|------|--------------------|
| 页 63: [740] 带格式的 | User | 2018/6/30 17:02:00 |
|------------------|------|--------------------|

无下划线, 字体颜色: 自动设置

|                  |      |                    |
|------------------|------|--------------------|
| 页 63: [741] 带格式的 | User | 2018/6/30 17:02:00 |
|------------------|------|--------------------|

无下划线, 字体颜色: 自动设置

|                  |      |                    |
|------------------|------|--------------------|
| 页 63: [742] 带格式的 | User | 2018/6/30 17:15:00 |
|------------------|------|--------------------|

定义网格后不调整右缩进, 不对齐到网格

|                  |      |                    |
|------------------|------|--------------------|
| 页 63: [743] 带格式的 | User | 2018/6/30 17:02:00 |
|------------------|------|--------------------|

无下划线, 字体颜色: 自动设置

|                  |      |                    |
|------------------|------|--------------------|
| 页 63: [743] 带格式的 | User | 2018/6/30 17:02:00 |
|------------------|------|--------------------|

无下划线, 字体颜色: 自动设置

|                  |      |                    |
|------------------|------|--------------------|
| 页 63: [744] 带格式的 | User | 2018/6/30 17:02:00 |
|------------------|------|--------------------|

无下划线, 字体颜色: 自动设置

|                  |      |                    |
|------------------|------|--------------------|
| 页 63: [744] 带格式的 | User | 2018/6/30 17:02:00 |
|------------------|------|--------------------|

无下划线, 字体颜色: 自动设置

|                  |      |                    |
|------------------|------|--------------------|
| 页 63: [745] 带格式的 | User | 2018/6/30 17:02:00 |
|------------------|------|--------------------|

无下划线, 字体颜色: 自动设置

|                  |      |                    |
|------------------|------|--------------------|
| 页 63: [745] 带格式的 | User | 2018/6/30 17:02:00 |
|------------------|------|--------------------|

无下划线, 字体颜色: 自动设置

|                  |      |                    |
|------------------|------|--------------------|
| 页 63: [746] 带格式的 | User | 2018/6/30 17:02:00 |
|------------------|------|--------------------|

无下划线, 字体颜色: 自动设置

|                  |      |                    |
|------------------|------|--------------------|
| 页 63: [746] 带格式的 | User | 2018/6/30 17:02:00 |
|------------------|------|--------------------|

无下划线, 字体颜色: 自动设置

|                  |      |                    |
|------------------|------|--------------------|
| 页 63: [747] 带格式的 | User | 2018/6/30 17:02:00 |
|------------------|------|--------------------|

无下划线, 字体颜色: 自动设置

|                  |      |                    |
|------------------|------|--------------------|
| 页 63: [747] 带格式的 | User | 2018/6/30 17:02:00 |
|------------------|------|--------------------|

无下划线, 字体颜色: 自动设置

|                  |      |                    |
|------------------|------|--------------------|
| 页 63: [748] 带格式的 | User | 2018/6/30 17:02:00 |
|------------------|------|--------------------|

无下划线, 字体颜色: 自动设置

|                  |      |                    |
|------------------|------|--------------------|
| 页 63: [748] 带格式的 | User | 2018/6/30 17:02:00 |
|------------------|------|--------------------|

无下划线, 字体颜色: 自动设置

|                  |      |                    |
|------------------|------|--------------------|
| 页 63: [749] 带格式的 | User | 2018/6/30 17:02:00 |
|------------------|------|--------------------|

无下划线, 字体颜色: 自动设置

|                  |      |                    |
|------------------|------|--------------------|
| 页 63: [749] 带格式的 | User | 2018/6/30 17:02:00 |
|------------------|------|--------------------|

无下划线, 字体颜色: 自动设置

|                  |      |                    |
|------------------|------|--------------------|
| 页 63: [750] 带格式的 | User | 2018/6/30 17:02:00 |
|------------------|------|--------------------|

无下划线, 字体颜色: 自动设置

|                  |      |                    |
|------------------|------|--------------------|
| 页 63: [750] 带格式的 | User | 2018/6/30 17:02:00 |
|------------------|------|--------------------|

无下划线, 字体颜色: 自动设置

|                  |      |                    |
|------------------|------|--------------------|
| 页 63: [751] 带格式的 | User | 2018/6/30 17:02:00 |
|------------------|------|--------------------|

无下划线, 字体颜色: 自动设置

|                  |      |                    |
|------------------|------|--------------------|
| 页 63: [751] 带格式的 | User | 2018/6/30 17:02:00 |
|------------------|------|--------------------|

无下划线, 字体颜色: 自动设置

|                  |      |                    |
|------------------|------|--------------------|
| 页 63: [752] 带格式的 | User | 2018/6/30 17:02:00 |
|------------------|------|--------------------|

无下划线, 字体颜色: 自动设置

|                  |      |                    |
|------------------|------|--------------------|
| 页 63: [752] 带格式的 | User | 2018/6/30 17:02:00 |
|------------------|------|--------------------|

无下划线, 字体颜色: 自动设置

|                  |      |                    |
|------------------|------|--------------------|
| 页 63: [753] 带格式的 | User | 2018/6/30 17:02:00 |
|------------------|------|--------------------|

无下划线, 字体颜色: 自动设置

|                  |      |                    |
|------------------|------|--------------------|
| 页 63: [753] 带格式的 | User | 2018/6/30 17:02:00 |
|------------------|------|--------------------|

无下划线, 字体颜色: 自动设置

|                  |      |                    |
|------------------|------|--------------------|
| 页 63: [754] 带格式的 | User | 2018/6/30 17:02:00 |
|------------------|------|--------------------|

无下划线, 字体颜色: 自动设置

|                  |      |                    |
|------------------|------|--------------------|
| 页 63: [754] 带格式的 | User | 2018/6/30 17:02:00 |
|------------------|------|--------------------|

无下划线, 字体颜色: 自动设置

|                  |      |                    |
|------------------|------|--------------------|
| 页 63: [755] 带格式的 | User | 2018/6/30 17:02:00 |
|------------------|------|--------------------|

无下划线, 字体颜色: 自动设置

|                  |      |                    |
|------------------|------|--------------------|
| 页 63: [755] 带格式的 | User | 2018/6/30 17:02:00 |
|------------------|------|--------------------|

无下划线, 字体颜色: 自动设置

|                  |      |                    |
|------------------|------|--------------------|
| 页 63: [756] 带格式的 | User | 2018/6/30 17:02:00 |
|------------------|------|--------------------|

无下划线, 字体颜色: 自动设置

|                  |      |                    |
|------------------|------|--------------------|
| 页 63: [757] 带格式的 | User | 2018/6/30 17:15:00 |
|------------------|------|--------------------|

定义网格后不调整右缩进, 不对齐到网格

|                  |      |                    |
|------------------|------|--------------------|
| 页 63: [758] 带格式的 | User | 2018/6/30 17:02:00 |
|------------------|------|--------------------|

无下划线, 字体颜色: 自动设置

|                  |      |                    |
|------------------|------|--------------------|
| 页 63: [758] 带格式的 | User | 2018/6/30 17:02:00 |
|------------------|------|--------------------|

无下划线, 字体颜色: 自动设置

|                  |      |                    |
|------------------|------|--------------------|
| 页 63: [759] 带格式的 | User | 2018/6/30 17:02:00 |
|------------------|------|--------------------|

无下划线, 字体颜色: 自动设置

|                  |      |                    |
|------------------|------|--------------------|
| 页 63: [759] 带格式的 | User | 2018/6/30 17:02:00 |
|------------------|------|--------------------|

无下划线, 字体颜色: 自动设置

|                  |      |                    |
|------------------|------|--------------------|
| 页 63: [760] 带格式的 | User | 2018/6/30 17:02:00 |
|------------------|------|--------------------|

无下划线, 字体颜色: 自动设置

|                  |      |                    |
|------------------|------|--------------------|
| 页 63: [760] 带格式的 | User | 2018/6/30 17:02:00 |
|------------------|------|--------------------|

无下划线, 字体颜色: 自动设置

|                  |      |                    |
|------------------|------|--------------------|
| 页 63: [761] 带格式的 | User | 2018/6/30 17:02:00 |
|------------------|------|--------------------|

无下划线, 字体颜色: 自动设置

|                  |      |                    |
|------------------|------|--------------------|
| 页 63: [761] 带格式的 | User | 2018/6/30 17:02:00 |
|------------------|------|--------------------|

无下划线, 字体颜色: 自动设置

|                  |      |                    |
|------------------|------|--------------------|
| 页 63: [762] 带格式的 | User | 2018/6/30 17:02:00 |
|------------------|------|--------------------|

无下划线, 字体颜色: 自动设置

|                  |      |                    |
|------------------|------|--------------------|
| 页 63: [762] 带格式的 | User | 2018/6/30 17:02:00 |
|------------------|------|--------------------|

无下划线, 字体颜色: 自动设置

|                  |      |                    |
|------------------|------|--------------------|
| 页 63: [763] 带格式的 | User | 2018/6/30 17:02:00 |
|------------------|------|--------------------|

无下划线, 字体颜色: 自动设置

|                  |      |                    |
|------------------|------|--------------------|
| 页 63: [763] 带格式的 | User | 2018/6/30 17:02:00 |
|------------------|------|--------------------|

无下划线, 字体颜色: 自动设置

|                  |      |                    |
|------------------|------|--------------------|
| 页 63: [764] 带格式的 | User | 2018/6/30 17:02:00 |
|------------------|------|--------------------|

无下划线, 字体颜色: 自动设置

|                  |      |                    |
|------------------|------|--------------------|
| 页 63: [764] 带格式的 | User | 2018/6/30 17:02:00 |
|------------------|------|--------------------|

无下划线, 字体颜色: 自动设置

|                  |      |                    |
|------------------|------|--------------------|
| 页 63: [765] 带格式的 | User | 2018/6/30 17:02:00 |
|------------------|------|--------------------|

无下划线, 字体颜色: 自动设置

|                  |      |                    |
|------------------|------|--------------------|
| 页 63: [765] 带格式的 | User | 2018/6/30 17:02:00 |
|------------------|------|--------------------|

无下划线, 字体颜色: 自动设置

|                  |      |                    |
|------------------|------|--------------------|
| 页 63: [766] 带格式的 | User | 2018/6/30 17:02:00 |
|------------------|------|--------------------|

无下划线, 字体颜色: 自动设置

|                  |      |                    |
|------------------|------|--------------------|
| 页 63: [766] 带格式的 | User | 2018/6/30 17:02:00 |
|------------------|------|--------------------|

无下划线, 字体颜色: 自动设置

|                  |      |                    |
|------------------|------|--------------------|
| 页 63: [767] 带格式的 | User | 2018/6/30 17:02:00 |
|------------------|------|--------------------|

无下划线, 字体颜色: 自动设置

|                  |      |                    |
|------------------|------|--------------------|
| 页 63: [767] 带格式的 | User | 2018/6/30 17:02:00 |
|------------------|------|--------------------|

无下划线, 字体颜色: 自动设置

|                  |      |                    |
|------------------|------|--------------------|
| 页 63: [768] 带格式的 | User | 2018/6/30 17:02:00 |
|------------------|------|--------------------|

无下划线, 字体颜色: 自动设置

|                  |      |                    |
|------------------|------|--------------------|
| 页 63: [768] 带格式的 | User | 2018/6/30 17:02:00 |
|------------------|------|--------------------|

无下划线, 字体颜色: 自动设置

|                  |      |                    |
|------------------|------|--------------------|
| 页 63: [769] 带格式的 | User | 2018/6/30 17:02:00 |
|------------------|------|--------------------|

无下划线, 字体颜色: 自动设置

|                  |      |                    |
|------------------|------|--------------------|
| 页 63: [769] 带格式的 | User | 2018/6/30 17:02:00 |
|------------------|------|--------------------|

无下划线, 字体颜色: 自动设置

|                  |      |                    |
|------------------|------|--------------------|
| 页 63: [770] 带格式的 | User | 2018/6/30 17:02:00 |
|------------------|------|--------------------|



无下划线, 字体颜色: 自动设置

|                  |      |                    |
|------------------|------|--------------------|
| 页 63: [770] 带格式的 | User | 2018/6/30 17:02:00 |
|------------------|------|--------------------|

无下划线, 字体颜色: 自动设置

|                  |      |                    |
|------------------|------|--------------------|
| 页 63: [771] 带格式的 | User | 2018/6/30 17:02:00 |
|------------------|------|--------------------|

无下划线, 字体颜色: 自动设置

|                  |      |                    |
|------------------|------|--------------------|
| 页 63: [772] 带格式的 | User | 2018/6/30 17:15:00 |
|------------------|------|--------------------|

定义网格后不调整右缩进, 不对齐到网格

|                  |      |                    |
|------------------|------|--------------------|
| 页 63: [773] 带格式的 | User | 2018/6/30 17:02:00 |
|------------------|------|--------------------|

无下划线, 字体颜色: 自动设置

|                  |      |                    |
|------------------|------|--------------------|
| 页 63: [773] 带格式的 | User | 2018/6/30 17:02:00 |
|------------------|------|--------------------|

无下划线, 字体颜色: 自动设置

|                  |      |                    |
|------------------|------|--------------------|
| 页 63: [774] 带格式的 | User | 2018/6/30 17:02:00 |
|------------------|------|--------------------|

无下划线, 字体颜色: 自动设置

|                  |      |                    |
|------------------|------|--------------------|
| 页 63: [774] 带格式的 | User | 2018/6/30 17:02:00 |
|------------------|------|--------------------|

无下划线, 字体颜色: 自动设置

|                  |      |                    |
|------------------|------|--------------------|
| 页 63: [775] 带格式的 | User | 2018/6/30 17:02:00 |
|------------------|------|--------------------|

无下划线, 字体颜色: 自动设置

|                  |      |                    |
|------------------|------|--------------------|
| 页 63: [775] 带格式的 | User | 2018/6/30 17:02:00 |
|------------------|------|--------------------|

无下划线, 字体颜色: 自动设置

|                  |      |                    |
|------------------|------|--------------------|
| 页 63: [776] 带格式的 | User | 2018/6/30 17:02:00 |
|------------------|------|--------------------|

无下划线, 字体颜色: 自动设置

|                  |      |                    |
|------------------|------|--------------------|
| 页 63: [776] 带格式的 | User | 2018/6/30 17:02:00 |
|------------------|------|--------------------|

无下划线, 字体颜色: 自动设置

|                  |      |                    |
|------------------|------|--------------------|
| 页 63: [777] 带格式的 | User | 2018/6/30 17:02:00 |
|------------------|------|--------------------|

无下划线, 字体颜色: 自动设置

|                  |      |                    |
|------------------|------|--------------------|
| 页 63: [777] 带格式的 | User | 2018/6/30 17:02:00 |
|------------------|------|--------------------|

无下划线, 字体颜色: 自动设置

|                  |      |                    |
|------------------|------|--------------------|
| 页 63: [778] 带格式的 | User | 2018/6/30 17:02:00 |
|------------------|------|--------------------|

无下划线, 字体颜色: 自动设置

|                  |      |                    |
|------------------|------|--------------------|
| 页 63: [778] 带格式的 | User | 2018/6/30 17:02:00 |
|------------------|------|--------------------|

无下划线, 字体颜色: 自动设置

|                  |      |                    |
|------------------|------|--------------------|
| 页 63: [779] 带格式的 | User | 2018/6/30 17:02:00 |
|------------------|------|--------------------|

无下划线, 字体颜色: 自动设置

|                  |      |                    |
|------------------|------|--------------------|
| 页 63: [779] 带格式的 | User | 2018/6/30 17:02:00 |
|------------------|------|--------------------|

无下划线, 字体颜色: 自动设置

|                  |      |                    |
|------------------|------|--------------------|
| 页 63: [780] 带格式的 | User | 2018/6/30 17:02:00 |
|------------------|------|--------------------|

无下划线, 字体颜色: 自动设置

|                  |      |                    |
|------------------|------|--------------------|
| 页 63: [780] 带格式的 | User | 2018/6/30 17:02:00 |
|------------------|------|--------------------|

无下划线, 字体颜色: 自动设置

|                  |      |                    |
|------------------|------|--------------------|
| 页 63: [781] 带格式的 | User | 2018/6/30 17:02:00 |
|------------------|------|--------------------|

无下划线, 字体颜色: 自动设置

|                  |      |                    |
|------------------|------|--------------------|
| 页 63: [781] 带格式的 | User | 2018/6/30 17:02:00 |
|------------------|------|--------------------|

无下划线, 字体颜色: 自动设置

|                  |      |                    |
|------------------|------|--------------------|
| 页 63: [782] 带格式的 | User | 2018/6/30 17:02:00 |
|------------------|------|--------------------|

无下划线, 字体颜色: 自动设置

|                  |      |                    |
|------------------|------|--------------------|
| 页 63: [782] 带格式的 | User | 2018/6/30 17:02:00 |
|------------------|------|--------------------|

无下划线, 字体颜色: 自动设置

|                  |      |                    |
|------------------|------|--------------------|
| 页 63: [783] 带格式的 | User | 2018/6/30 17:02:00 |
|------------------|------|--------------------|

无下划线, 字体颜色: 自动设置

|                  |      |                    |
|------------------|------|--------------------|
| 页 63: [783] 带格式的 | User | 2018/6/30 17:02:00 |
|------------------|------|--------------------|

无下划线, 字体颜色: 自动设置

|                  |      |                    |
|------------------|------|--------------------|
| 页 63: [784] 带格式的 | User | 2018/6/30 17:02:00 |
|------------------|------|--------------------|

无下划线, 字体颜色: 自动设置

|                  |      |                    |
|------------------|------|--------------------|
| 页 63: [784] 带格式的 | User | 2018/6/30 17:02:00 |
|------------------|------|--------------------|

无下划线, 字体颜色: 自动设置

|                  |      |                    |
|------------------|------|--------------------|
| 页 63: [785] 带格式的 | User | 2018/6/30 17:02:00 |
|------------------|------|--------------------|

无下划线, 字体颜色: 自动设置

|                  |      |                    |
|------------------|------|--------------------|
| 页 63: [785] 带格式的 | User | 2018/6/30 17:02:00 |
|------------------|------|--------------------|

无下划线, 字体颜色: 自动设置

|                  |      |                    |
|------------------|------|--------------------|
| 页 63: [786] 带格式的 | User | 2018/6/30 17:02:00 |
|------------------|------|--------------------|

无下划线, 字体颜色: 自动设置

|                  |      |                    |
|------------------|------|--------------------|
| 页 63: [787] 带格式的 | User | 2018/6/30 17:15:00 |
|------------------|------|--------------------|

定义网格后不调整右缩进, 不对齐到网格

|                  |      |                    |
|------------------|------|--------------------|
| 页 63: [788] 带格式的 | User | 2018/6/30 17:02:00 |
|------------------|------|--------------------|

无下划线, 字体颜色: 自动设置

|                  |      |                    |
|------------------|------|--------------------|
| 页 63: [788] 带格式的 | User | 2018/6/30 17:02:00 |
|------------------|------|--------------------|

无下划线, 字体颜色: 自动设置

|                  |      |                    |
|------------------|------|--------------------|
| 页 63: [789] 带格式的 | User | 2018/6/30 17:02:00 |
|------------------|------|--------------------|

无下划线, 字体颜色: 自动设置

|                  |      |                    |
|------------------|------|--------------------|
| 页 63: [789] 带格式的 | User | 2018/6/30 17:02:00 |
|------------------|------|--------------------|

无下划线, 字体颜色: 自动设置

|                  |      |                    |
|------------------|------|--------------------|
| 页 63: [790] 带格式的 | User | 2018/6/30 17:02:00 |
|------------------|------|--------------------|

无下划线, 字体颜色: 自动设置

|                  |      |                    |
|------------------|------|--------------------|
| 页 63: [790] 带格式的 | User | 2018/6/30 17:02:00 |
|------------------|------|--------------------|

无下划线, 字体颜色: 自动设置

|                  |      |                    |
|------------------|------|--------------------|
| 页 63: [791] 带格式的 | User | 2018/6/30 17:02:00 |
|------------------|------|--------------------|

无下划线, 字体颜色: 自动设置

|                  |      |                    |
|------------------|------|--------------------|
| 页 63: [791] 带格式的 | User | 2018/6/30 17:02:00 |
|------------------|------|--------------------|

无下划线, 字体颜色: 自动设置

|                  |      |                    |
|------------------|------|--------------------|
| 页 63: [792] 带格式的 | User | 2018/6/30 17:02:00 |
|------------------|------|--------------------|

无下划线, 字体颜色: 自动设置

|                  |      |                    |
|------------------|------|--------------------|
| 页 63: [792] 带格式的 | User | 2018/6/30 17:02:00 |
|------------------|------|--------------------|

无下划线, 字体颜色: 自动设置

|                  |      |                    |
|------------------|------|--------------------|
| 页 63: [793] 带格式的 | User | 2018/6/30 17:02:00 |
|------------------|------|--------------------|

无下划线, 字体颜色: 自动设置

|                  |      |                    |
|------------------|------|--------------------|
| 页 63: [793] 带格式的 | User | 2018/6/30 17:02:00 |
|------------------|------|--------------------|

无下划线, 字体颜色: 自动设置

|                  |      |                    |
|------------------|------|--------------------|
| 页 63: [794] 带格式的 | User | 2018/6/30 17:02:00 |
|------------------|------|--------------------|

无下划线, 字体颜色: 自动设置

|                  |      |                    |
|------------------|------|--------------------|
| 页 63: [794] 带格式的 | User | 2018/6/30 17:02:00 |
|------------------|------|--------------------|

无下划线, 字体颜色: 自动设置

|                  |      |                    |
|------------------|------|--------------------|
| 页 63: [795] 带格式的 | User | 2018/6/30 17:02:00 |
|------------------|------|--------------------|

无下划线, 字体颜色: 自动设置

|                  |      |                    |
|------------------|------|--------------------|
| 页 63: [795] 带格式的 | User | 2018/6/30 17:02:00 |
|------------------|------|--------------------|

无下划线, 字体颜色: 自动设置

|                  |      |                    |
|------------------|------|--------------------|
| 页 63: [796] 带格式的 | User | 2018/6/30 17:02:00 |
|------------------|------|--------------------|

无下划线, 字体颜色: 自动设置

|                  |      |                    |
|------------------|------|--------------------|
| 页 63: [796] 带格式的 | User | 2018/6/30 17:02:00 |
|------------------|------|--------------------|

无下划线, 字体颜色: 自动设置

|                  |      |                    |
|------------------|------|--------------------|
| 页 63: [797] 带格式的 | User | 2018/6/30 17:02:00 |
|------------------|------|--------------------|

无下划线, 字体颜色: 自动设置

|                  |      |                    |
|------------------|------|--------------------|
| 页 63: [797] 带格式的 | User | 2018/6/30 17:02:00 |
|------------------|------|--------------------|

无下划线, 字体颜色: 自动设置

|                  |      |                    |
|------------------|------|--------------------|
| 页 63: [798] 带格式的 | User | 2018/6/30 17:02:00 |
|------------------|------|--------------------|

无下划线, 字体颜色: 自动设置

|                  |      |                    |
|------------------|------|--------------------|
| 页 63: [798] 带格式的 | User | 2018/6/30 17:02:00 |
|------------------|------|--------------------|

无下划线, 字体颜色: 自动设置

|                  |      |                    |
|------------------|------|--------------------|
| 页 63: [799] 带格式的 | User | 2018/6/30 17:02:00 |
|------------------|------|--------------------|

无下划线, 字体颜色: 自动设置

|                  |      |                    |
|------------------|------|--------------------|
| 页 63: [799] 带格式的 | User | 2018/6/30 17:02:00 |
|------------------|------|--------------------|

无下划线, 字体颜色: 自动设置

|                  |      |                    |
|------------------|------|--------------------|
| 页 63: [800] 带格式的 | User | 2018/6/30 17:02:00 |
|------------------|------|--------------------|

无下划线, 字体颜色: 自动设置

|                  |      |                    |
|------------------|------|--------------------|
| 页 63: [800] 带格式的 | User | 2018/6/30 17:02:00 |
|------------------|------|--------------------|

无下划线, 字体颜色: 自动设置

|                  |      |                    |
|------------------|------|--------------------|
| 页 64: [801] 带格式的 | User | 2018/6/30 17:02:00 |
|------------------|------|--------------------|

无下划线, 字体颜色: 自动设置

|                  |      |                    |
|------------------|------|--------------------|
| 页 64: [802] 带格式的 | User | 2018/6/30 17:02:00 |
|------------------|------|--------------------|

无下划线, 字体颜色: 自动设置

|                  |      |                    |
|------------------|------|--------------------|
| 页 64: [803] 带格式的 | User | 2018/6/30 17:15:00 |
|------------------|------|--------------------|

定义网格后不调整右缩进, 不对齐到网格

|                  |      |                    |
|------------------|------|--------------------|
| 页 64: [804] 带格式的 | User | 2018/6/30 17:02:00 |
|------------------|------|--------------------|

无下划线, 字体颜色: 自动设置

|                  |      |                    |
|------------------|------|--------------------|
| 页 64: [804] 带格式的 | User | 2018/6/30 17:02:00 |
|------------------|------|--------------------|

无下划线, 字体颜色: 自动设置

|                  |      |                    |
|------------------|------|--------------------|
| 页 64: [805] 带格式的 | User | 2018/6/30 17:02:00 |
|------------------|------|--------------------|

无下划线, 字体颜色: 自动设置

|                  |      |                    |
|------------------|------|--------------------|
| 页 64: [805] 带格式的 | User | 2018/6/30 17:02:00 |
|------------------|------|--------------------|

无下划线, 字体颜色: 自动设置

|                  |      |                    |
|------------------|------|--------------------|
| 页 64: [806] 带格式的 | User | 2018/6/30 17:02:00 |
|------------------|------|--------------------|

无下划线, 字体颜色: 自动设置

|                  |      |                    |
|------------------|------|--------------------|
| 页 64: [806] 带格式的 | User | 2018/6/30 17:02:00 |
|------------------|------|--------------------|

无下划线, 字体颜色: 自动设置

|                  |      |                    |
|------------------|------|--------------------|
| 页 64: [807] 带格式的 | User | 2018/6/30 17:02:00 |
|------------------|------|--------------------|

无下划线, 字体颜色: 自动设置

|                  |      |                    |
|------------------|------|--------------------|
| 页 64: [807] 带格式的 | User | 2018/6/30 17:02:00 |
|------------------|------|--------------------|

无下划线, 字体颜色: 自动设置

|                  |      |                    |
|------------------|------|--------------------|
| 页 64: [808] 带格式的 | User | 2018/6/30 17:02:00 |
|------------------|------|--------------------|

无下划线, 字体颜色: 自动设置

|                  |      |                    |
|------------------|------|--------------------|
| 页 64: [808] 带格式的 | User | 2018/6/30 17:02:00 |
|------------------|------|--------------------|

无下划线, 字体颜色: 自动设置

|                  |      |                    |
|------------------|------|--------------------|
| 页 64: [809] 带格式的 | User | 2018/6/30 17:02:00 |
|------------------|------|--------------------|

无下划线, 字体颜色: 自动设置

|                  |      |                    |
|------------------|------|--------------------|
| 页 64: [809] 带格式的 | User | 2018/6/30 17:02:00 |
|------------------|------|--------------------|

无下划线, 字体颜色: 自动设置

|                  |      |                    |
|------------------|------|--------------------|
| 页 64: [810] 带格式的 | User | 2018/6/30 17:02:00 |
|------------------|------|--------------------|

无下划线, 字体颜色: 自动设置

|                  |      |                    |
|------------------|------|--------------------|
| 页 64: [810] 带格式的 | User | 2018/6/30 17:02:00 |
|------------------|------|--------------------|

无下划线, 字体颜色: 自动设置

|                  |      |                    |
|------------------|------|--------------------|
| 页 64: [811] 带格式的 | User | 2018/6/30 17:02:00 |
|------------------|------|--------------------|

无下划线, 字体颜色: 自动设置

|                  |      |                    |
|------------------|------|--------------------|
| 页 64: [811] 带格式的 | User | 2018/6/30 17:02:00 |
|------------------|------|--------------------|

无下划线, 字体颜色: 自动设置

|                  |      |                    |
|------------------|------|--------------------|
| 页 64: [812] 带格式的 | User | 2018/6/30 17:02:00 |
|------------------|------|--------------------|

无下划线, 字体颜色: 自动设置

|                  |      |                    |
|------------------|------|--------------------|
| 页 64: [813] 带格式的 | User | 2018/6/30 17:15:00 |
|------------------|------|--------------------|

定义网格后不调整右缩进, 不对齐到网格

|                  |      |                    |
|------------------|------|--------------------|
| 页 64: [814] 带格式的 | User | 2018/6/30 17:02:00 |
|------------------|------|--------------------|

无下划线, 字体颜色: 自动设置

|                  |      |                    |
|------------------|------|--------------------|
| 页 64: [815] 带格式的 | User | 2018/6/30 17:02:00 |
|------------------|------|--------------------|

无下划线, 字体颜色: 自动设置

|                  |      |                    |
|------------------|------|--------------------|
| 页 64: [816] 带格式的 | User | 2018/6/30 17:02:00 |
|------------------|------|--------------------|

无下划线, 字体颜色: 自动设置

|                  |      |                    |
|------------------|------|--------------------|
| 页 64: [817] 带格式的 | User | 2018/6/30 17:02:00 |
|------------------|------|--------------------|

无下划线, 字体颜色: 自动设置

|                  |      |                    |
|------------------|------|--------------------|
| 页 64: [818] 带格式的 | User | 2018/6/30 17:02:00 |
|------------------|------|--------------------|

无下划线, 字体颜色: 自动设置

|                  |      |                    |
|------------------|------|--------------------|
| 页 64: [819] 带格式的 | User | 2018/6/30 17:02:00 |
|------------------|------|--------------------|

无下划线, 字体颜色: 自动设置

|                  |      |                    |
|------------------|------|--------------------|
| 页 64: [820] 带格式的 | User | 2018/6/30 17:02:00 |
|------------------|------|--------------------|

无下划线, 字体颜色: 自动设置

|                  |      |                    |
|------------------|------|--------------------|
| 页 64: [821] 带格式的 | User | 2018/6/30 17:15:00 |
|------------------|------|--------------------|

定义网格后不调整右缩进, 不对齐到网格

|                  |      |                    |
|------------------|------|--------------------|
| 页 64: [822] 带格式的 | User | 2018/6/30 17:02:00 |
|------------------|------|--------------------|

无下划线, 字体颜色: 自动设置

|                  |      |                    |
|------------------|------|--------------------|
| 页 64: [823] 带格式的 | User | 2018/6/30 17:02:00 |
|------------------|------|--------------------|

无下划线, 字体颜色: 自动设置

|                  |      |                    |
|------------------|------|--------------------|
| 页 64: [824] 带格式的 | User | 2018/6/30 17:02:00 |
|------------------|------|--------------------|

无下划线, 字体颜色: 自动设置

|                  |      |                    |
|------------------|------|--------------------|
| 页 64: [825] 带格式的 | User | 2018/6/30 17:02:00 |
|------------------|------|--------------------|

无下划线, 字体颜色: 自动设置

|                  |      |                    |
|------------------|------|--------------------|
| 页 64: [826] 带格式的 | User | 2018/6/30 17:02:00 |
|------------------|------|--------------------|

无下划线, 字体颜色: 自动设置

|                  |      |                    |
|------------------|------|--------------------|
| 页 64: [827] 带格式的 | User | 2018/6/30 17:02:00 |
|------------------|------|--------------------|

无下划线, 字体颜色: 自动设置

|                  |      |                    |
|------------------|------|--------------------|
| 页 64: [828] 带格式的 | User | 2018/6/30 17:02:00 |
|------------------|------|--------------------|

无下划线, 字体颜色: 自动设置

|                  |      |                    |
|------------------|------|--------------------|
| 页 64: [829] 带格式的 | User | 2018/6/30 17:15:00 |
|------------------|------|--------------------|

定义网格后不调整右缩进, 不对齐到网格

|                  |      |                    |
|------------------|------|--------------------|
| 页 64: [830] 带格式的 | User | 2018/6/30 17:02:00 |
|------------------|------|--------------------|

无下划线, 字体颜色: 自动设置

|                  |      |                    |
|------------------|------|--------------------|
| 页 64: [831] 带格式的 | User | 2018/6/30 17:02:00 |
|------------------|------|--------------------|

无下划线, 字体颜色: 自动设置

|                  |      |                    |
|------------------|------|--------------------|
| 页 64: [832] 带格式的 | User | 2018/6/30 17:02:00 |
|------------------|------|--------------------|

无下划线, 字体颜色: 自动设置

|                  |      |                    |
|------------------|------|--------------------|
| 页 64: [833] 带格式的 | User | 2018/6/30 17:02:00 |
|------------------|------|--------------------|

无下划线, 字体颜色: 自动设置

|                  |      |                    |
|------------------|------|--------------------|
| 页 64: [834] 带格式的 | User | 2018/6/30 17:02:00 |
|------------------|------|--------------------|

无下划线, 字体颜色: 自动设置

|                  |      |                    |
|------------------|------|--------------------|
| 页 64: [835] 带格式的 | User | 2018/6/30 17:02:00 |
|------------------|------|--------------------|

无下划线, 字体颜色: 自动设置

|                  |      |                    |
|------------------|------|--------------------|
| 页 64: [836] 带格式的 | User | 2018/6/30 17:02:00 |
|------------------|------|--------------------|

无下划线, 字体颜色: 自动设置

|                  |      |                    |
|------------------|------|--------------------|
| 页 64: [837] 带格式的 | User | 2018/6/30 17:15:00 |
|------------------|------|--------------------|

定义网格后不调整右缩进, 不对齐到网格

|                  |      |                    |
|------------------|------|--------------------|
| 页 64: [838] 带格式的 | User | 2018/6/30 17:02:00 |
|------------------|------|--------------------|

无下划线, 字体颜色: 自动设置

|                  |      |                    |
|------------------|------|--------------------|
| 页 64: [839] 带格式的 | User | 2018/6/30 17:02:00 |
|------------------|------|--------------------|

无下划线, 字体颜色: 自动设置

|                  |      |                    |
|------------------|------|--------------------|
| 页 64: [840] 带格式的 | User | 2018/6/30 17:02:00 |
|------------------|------|--------------------|

无下划线, 字体颜色: 自动设置

|                  |      |                    |
|------------------|------|--------------------|
| 页 64: [841] 带格式的 | User | 2018/6/30 17:02:00 |
|------------------|------|--------------------|

无下划线, 字体颜色: 自动设置



|                  |      |                    |
|------------------|------|--------------------|
| 页 64: [842] 带格式的 | User | 2018/6/30 17:02:00 |
|------------------|------|--------------------|

无下划线, 字体颜色: 自动设置

|                  |      |                    |
|------------------|------|--------------------|
| 页 64: [843] 带格式的 | User | 2018/6/30 17:02:00 |
|------------------|------|--------------------|

无下划线, 字体颜色: 自动设置

|                  |      |                    |
|------------------|------|--------------------|
| 页 64: [844] 带格式的 | User | 2018/6/30 17:02:00 |
|------------------|------|--------------------|

无下划线, 字体颜色: 自动设置

|                  |      |                    |
|------------------|------|--------------------|
| 页 64: [845] 带格式的 | User | 2018/6/30 17:15:00 |
|------------------|------|--------------------|

定义网格后不调整右缩进, 不对齐到网格

|                  |      |                    |
|------------------|------|--------------------|
| 页 64: [846] 带格式的 | User | 2018/6/30 17:02:00 |
|------------------|------|--------------------|

无下划线, 字体颜色: 自动设置

|                  |      |                    |
|------------------|------|--------------------|
| 页 64: [847] 带格式的 | User | 2018/6/30 17:02:00 |
|------------------|------|--------------------|

无下划线, 字体颜色: 自动设置

|                  |      |                    |
|------------------|------|--------------------|
| 页 64: [848] 带格式的 | User | 2018/6/30 17:02:00 |
|------------------|------|--------------------|

无下划线, 字体颜色: 自动设置

|                  |      |                    |
|------------------|------|--------------------|
| 页 64: [849] 带格式的 | User | 2018/6/30 17:02:00 |
|------------------|------|--------------------|

无下划线, 字体颜色: 自动设置

|                  |      |                    |
|------------------|------|--------------------|
| 页 64: [850] 带格式的 | User | 2018/6/30 17:02:00 |
|------------------|------|--------------------|

无下划线, 字体颜色: 自动设置

|                  |      |                    |
|------------------|------|--------------------|
| 页 64: [851] 带格式的 | User | 2018/6/30 17:02:00 |
|------------------|------|--------------------|

无下划线, 字体颜色: 自动设置

|                  |      |                    |
|------------------|------|--------------------|
| 页 64: [852] 带格式的 | User | 2018/6/30 17:02:00 |
|------------------|------|--------------------|

无下划线, 字体颜色: 自动设置

|                  |      |                    |
|------------------|------|--------------------|
| 页 64: [853] 带格式的 | User | 2018/6/30 17:15:00 |
|------------------|------|--------------------|

定义网格后不调整右缩进, 不对齐到网格

|                  |      |                    |
|------------------|------|--------------------|
| 页 64: [854] 带格式的 | User | 2018/6/30 17:02:00 |
|------------------|------|--------------------|

无下划线, 字体颜色: 自动设置

|                  |      |                    |
|------------------|------|--------------------|
| 页 64: [855] 带格式的 | User | 2018/6/30 17:02:00 |
|------------------|------|--------------------|

无下划线, 字体颜色: 自动设置

|                  |      |                    |
|------------------|------|--------------------|
| 页 64: [856] 带格式的 | User | 2018/6/30 17:02:00 |
|------------------|------|--------------------|

无下划线, 字体颜色: 自动设置

|                  |      |                    |
|------------------|------|--------------------|
| 页 64: [857] 带格式的 | User | 2018/6/30 17:02:00 |
|------------------|------|--------------------|

无下划线, 字体颜色: 自动设置

|                  |      |                    |
|------------------|------|--------------------|
| 页 64: [858] 带格式的 | User | 2018/6/30 17:02:00 |
|------------------|------|--------------------|

无下划线, 字体颜色: 自动设置

|                  |      |                    |
|------------------|------|--------------------|
| 页 64: [859] 带格式的 | User | 2018/6/30 17:02:00 |
|------------------|------|--------------------|

无下划线, 字体颜色: 自动设置

|                  |      |                    |
|------------------|------|--------------------|
| 页 64: [860] 带格式的 | User | 2018/6/30 17:02:00 |
|------------------|------|--------------------|

无下划线, 字体颜色: 自动设置

|                  |      |                    |
|------------------|------|--------------------|
| 页 64: [861] 带格式的 | User | 2018/6/30 17:15:00 |
|------------------|------|--------------------|

定义网格后不调整右缩进, 不对齐到网格

|                  |      |                    |
|------------------|------|--------------------|
| 页 64: [862] 带格式的 | User | 2018/6/30 17:02:00 |
|------------------|------|--------------------|

无下划线, 字体颜色: 自动设置

|                  |      |                    |
|------------------|------|--------------------|
| 页 64: [863] 带格式的 | User | 2018/6/30 17:02:00 |
|------------------|------|--------------------|

无下划线, 字体颜色: 自动设置

|                  |      |                    |
|------------------|------|--------------------|
| 页 64: [864] 带格式的 | User | 2018/6/30 17:02:00 |
|------------------|------|--------------------|

无下划线, 字体颜色: 自动设置

|                  |      |                    |
|------------------|------|--------------------|
| 页 64: [865] 带格式的 | User | 2018/6/30 17:02:00 |
|------------------|------|--------------------|

无下划线, 字体颜色: 自动设置

|                  |      |                    |
|------------------|------|--------------------|
| 页 64: [866] 带格式的 | User | 2018/6/30 17:02:00 |
|------------------|------|--------------------|

无下划线, 字体颜色: 自动设置

|                  |      |                    |
|------------------|------|--------------------|
| 页 64: [867] 带格式的 | User | 2018/6/30 17:02:00 |
|------------------|------|--------------------|

无下划线, 字体颜色: 自动设置

|                  |      |                    |
|------------------|------|--------------------|
| 页 64: [868] 带格式的 | User | 2018/6/30 17:02:00 |
|------------------|------|--------------------|

无下划线, 字体颜色: 自动设置

|                  |      |                    |
|------------------|------|--------------------|
| 页 64: [869] 带格式的 | User | 2018/6/30 17:15:00 |
|------------------|------|--------------------|

定义网格后不调整右缩进, 不对齐到网格

|                  |      |                    |
|------------------|------|--------------------|
| 页 64: [870] 带格式的 | User | 2018/6/30 17:02:00 |
|------------------|------|--------------------|

无下划线, 字体颜色: 自动设置

|                  |      |                    |
|------------------|------|--------------------|
| 页 64: [871] 带格式的 | User | 2018/6/30 17:02:00 |
|------------------|------|--------------------|

无下划线, 字体颜色: 自动设置

|                  |      |                    |
|------------------|------|--------------------|
| 页 64: [872] 带格式的 | User | 2018/6/30 17:02:00 |
|------------------|------|--------------------|

无下划线, 字体颜色: 自动设置

|                  |      |                    |
|------------------|------|--------------------|
| 页 64: [873] 带格式的 | User | 2018/6/30 17:02:00 |
|------------------|------|--------------------|

无下划线, 字体颜色: 自动设置

|                  |      |                    |
|------------------|------|--------------------|
| 页 64: [874] 带格式的 | User | 2018/6/30 17:02:00 |
|------------------|------|--------------------|

无下划线, 字体颜色: 自动设置

|                  |      |                    |
|------------------|------|--------------------|
| 页 64: [875] 带格式的 | User | 2018/6/30 17:02:00 |
|------------------|------|--------------------|

无下划线, 字体颜色: 自动设置

|                  |      |                    |
|------------------|------|--------------------|
| 页 64: [876] 带格式的 | User | 2018/6/30 17:02:00 |
|------------------|------|--------------------|

无下划线, 字体颜色: 自动设置

|                  |      |                    |
|------------------|------|--------------------|
| 页 64: [877] 带格式的 | User | 2018/6/30 17:15:00 |
|------------------|------|--------------------|

定义网格后不调整右缩进, 不对齐到网格

|                  |      |                    |
|------------------|------|--------------------|
| 页 64: [878] 带格式的 | User | 2018/6/30 17:02:00 |
|------------------|------|--------------------|

无下划线, 字体颜色: 自动设置

|                  |      |                    |
|------------------|------|--------------------|
| 页 64: [879] 带格式的 | User | 2018/6/30 17:02:00 |
|------------------|------|--------------------|

无下划线, 字体颜色: 自动设置

|                  |      |                    |
|------------------|------|--------------------|
| 页 64: [880] 带格式的 | User | 2018/6/30 17:02:00 |
|------------------|------|--------------------|

无下划线, 字体颜色: 自动设置

|                  |      |                    |
|------------------|------|--------------------|
| 页 64: [881] 带格式的 | User | 2018/6/30 17:02:00 |
|------------------|------|--------------------|

无下划线, 字体颜色: 自动设置

|                  |      |                    |
|------------------|------|--------------------|
| 页 64: [882] 带格式的 | User | 2018/6/30 17:02:00 |
|------------------|------|--------------------|

无下划线, 字体颜色: 自动设置

|                  |      |                    |
|------------------|------|--------------------|
| 页 64: [883] 带格式的 | User | 2018/6/30 17:02:00 |
|------------------|------|--------------------|

无下划线, 字体颜色: 自动设置

|                  |      |                    |
|------------------|------|--------------------|
| 页 64: [884] 带格式的 | User | 2018/6/30 17:02:00 |
|------------------|------|--------------------|

无下划线, 字体颜色: 自动设置

|                  |      |                    |
|------------------|------|--------------------|
| 页 64: [885] 带格式的 | User | 2018/6/30 17:15:00 |
|------------------|------|--------------------|

定义网格后不调整右缩进, 不对齐到网格

|                  |      |                    |
|------------------|------|--------------------|
| 页 64: [886] 带格式的 | User | 2018/6/30 17:02:00 |
|------------------|------|--------------------|

无下划线, 字体颜色: 自动设置

|                  |      |                    |
|------------------|------|--------------------|
| 页 64: [887] 带格式的 | User | 2018/6/30 17:02:00 |
|------------------|------|--------------------|

无下划线, 字体颜色: 自动设置

|                  |      |                    |
|------------------|------|--------------------|
| 页 64: [888] 带格式的 | User | 2018/6/30 17:02:00 |
|------------------|------|--------------------|

无下划线, 字体颜色: 自动设置

|                  |      |                    |
|------------------|------|--------------------|
| 页 64: [889] 带格式的 | User | 2018/6/30 17:02:00 |
|------------------|------|--------------------|

无下划线, 字体颜色: 自动设置

|                  |      |                    |
|------------------|------|--------------------|
| 页 64: [890] 带格式的 | User | 2018/6/30 17:02:00 |
|------------------|------|--------------------|

无下划线, 字体颜色: 自动设置

|                  |      |                    |
|------------------|------|--------------------|
| 页 64: [891] 带格式的 | User | 2018/6/30 17:02:00 |
|------------------|------|--------------------|

无下划线, 字体颜色: 自动设置

|                  |      |                    |
|------------------|------|--------------------|
| 页 64: [892] 带格式的 | User | 2018/6/30 17:02:00 |
|------------------|------|--------------------|

无下划线, 字体颜色: 自动设置

|                  |      |                    |
|------------------|------|--------------------|
| 页 64: [893] 带格式的 | User | 2018/6/30 17:15:00 |
|------------------|------|--------------------|

定义网格后不调整右缩进, 不对齐到网格

|                  |      |                    |
|------------------|------|--------------------|
| 页 64: [894] 带格式的 | User | 2018/6/30 17:02:00 |
|------------------|------|--------------------|

无下划线, 字体颜色: 自动设置

|                  |      |                    |
|------------------|------|--------------------|
| 页 64: [895] 带格式的 | User | 2018/6/30 17:02:00 |
|------------------|------|--------------------|

无下划线, 字体颜色: 自动设置

|                  |      |                    |
|------------------|------|--------------------|
| 页 64: [896] 带格式的 | User | 2018/6/30 17:02:00 |
|------------------|------|--------------------|

无下划线, 字体颜色: 自动设置

|                  |      |                    |
|------------------|------|--------------------|
| 页 64: [897] 带格式的 | User | 2018/6/30 17:02:00 |
|------------------|------|--------------------|

无下划线, 字体颜色: 自动设置

|                  |      |                    |
|------------------|------|--------------------|
| 页 64: [898] 带格式的 | User | 2018/6/30 17:02:00 |
|------------------|------|--------------------|

无下划线, 字体颜色: 自动设置

|                  |      |                    |
|------------------|------|--------------------|
| 页 64: [899] 带格式的 | User | 2018/6/30 17:02:00 |
|------------------|------|--------------------|

无下划线, 字体颜色: 自动设置

|                  |      |                    |
|------------------|------|--------------------|
| 页 64: [900] 带格式的 | User | 2018/6/30 17:02:00 |
|------------------|------|--------------------|

无下划线, 字体颜色: 自动设置

|                  |      |                    |
|------------------|------|--------------------|
| 页 64: [901] 带格式的 | User | 2018/6/30 17:15:00 |
|------------------|------|--------------------|

定义网格后不调整右缩进, 不对齐到网格

|                  |      |                    |
|------------------|------|--------------------|
| 页 64: [902] 带格式的 | User | 2018/6/30 17:02:00 |
|------------------|------|--------------------|

无下划线, 字体颜色: 自动设置

|                  |      |                    |
|------------------|------|--------------------|
| 页 64: [903] 带格式的 | User | 2018/6/30 17:02:00 |
|------------------|------|--------------------|

无下划线, 字体颜色: 自动设置

|                  |      |                    |
|------------------|------|--------------------|
| 页 64: [904] 带格式的 | User | 2018/6/30 17:02:00 |
|------------------|------|--------------------|

无下划线, 字体颜色: 自动设置

|                  |      |                    |
|------------------|------|--------------------|
| 页 64: [905] 带格式的 | User | 2018/6/30 17:02:00 |
|------------------|------|--------------------|

无下划线, 字体颜色: 自动设置

|                  |      |                    |
|------------------|------|--------------------|
| 页 64: [906] 带格式的 | User | 2018/6/30 17:02:00 |
|------------------|------|--------------------|

无下划线, 字体颜色: 自动设置

|                  |      |                    |
|------------------|------|--------------------|
| 页 64: [907] 带格式的 | User | 2018/6/30 17:02:00 |
|------------------|------|--------------------|

无下划线, 字体颜色: 自动设置

|                  |      |                    |
|------------------|------|--------------------|
| 页 64: [908] 带格式的 | User | 2018/6/30 17:02:00 |
|------------------|------|--------------------|

无下划线, 字体颜色: 自动设置

|                  |      |                    |
|------------------|------|--------------------|
| 页 64: [909] 带格式的 | User | 2018/6/30 17:15:00 |
|------------------|------|--------------------|

定义网格后不调整右缩进, 不对齐到网格

|                  |      |                    |
|------------------|------|--------------------|
| 页 64: [910] 带格式的 | User | 2018/6/30 17:02:00 |
|------------------|------|--------------------|

无下划线, 字体颜色: 自动设置

|                  |      |                    |
|------------------|------|--------------------|
| 页 64: [911] 带格式的 | User | 2018/6/30 17:02:00 |
|------------------|------|--------------------|

无下划线, 字体颜色: 自动设置

|                  |      |                    |
|------------------|------|--------------------|
| 页 64: [912] 带格式的 | User | 2018/6/30 17:02:00 |
|------------------|------|--------------------|

无下划线, 字体颜色: 自动设置

|                  |      |                    |
|------------------|------|--------------------|
| 页 64: [913] 带格式的 | User | 2018/6/30 17:02:00 |
|------------------|------|--------------------|

无下划线, 字体颜色: 自动设置

|                  |      |                    |
|------------------|------|--------------------|
| 页 64: [914] 带格式的 | User | 2018/6/30 17:02:00 |
|------------------|------|--------------------|

无下划线, 字体颜色: 自动设置

|                  |      |                    |
|------------------|------|--------------------|
| 页 64: [915] 带格式的 | User | 2018/6/30 17:02:00 |
|------------------|------|--------------------|

无下划线, 字体颜色: 自动设置

|                  |      |                    |
|------------------|------|--------------------|
| 页 64: [916] 带格式的 | User | 2018/6/30 17:02:00 |
|------------------|------|--------------------|

无下划线, 字体颜色: 自动设置

|                  |      |                    |
|------------------|------|--------------------|
| 页 64: [917] 带格式的 | User | 2018/6/30 17:15:00 |
|------------------|------|--------------------|

定义网格后不调整右缩进, 不对齐到网格

|                  |      |                    |
|------------------|------|--------------------|
| 页 64: [918] 带格式的 | User | 2018/6/30 17:02:00 |
|------------------|------|--------------------|

无下划线, 字体颜色: 自动设置

|                  |      |                    |
|------------------|------|--------------------|
| 页 64: [919] 带格式的 | User | 2018/6/30 17:02:00 |
|------------------|------|--------------------|

无下划线, 字体颜色: 自动设置

|                  |      |                    |
|------------------|------|--------------------|
| 页 64: [920] 带格式的 | User | 2018/6/30 17:02:00 |
|------------------|------|--------------------|

无下划线, 字体颜色: 自动设置

|                  |      |                    |
|------------------|------|--------------------|
| 页 64: [921] 带格式的 | User | 2018/6/30 17:02:00 |
|------------------|------|--------------------|

无下划线, 字体颜色: 自动设置

|                  |      |                    |
|------------------|------|--------------------|
| 页 64: [922] 带格式的 | User | 2018/6/30 17:02:00 |
|------------------|------|--------------------|

无下划线, 字体颜色: 自动设置

|                  |      |                    |
|------------------|------|--------------------|
| 页 64: [923] 带格式的 | User | 2018/6/30 17:02:00 |
|------------------|------|--------------------|

无下划线, 字体颜色: 自动设置

|                  |      |                    |
|------------------|------|--------------------|
| 页 64: [924] 带格式的 | User | 2018/6/30 17:02:00 |
|------------------|------|--------------------|

无下划线, 字体颜色: 自动设置

|                  |      |                    |
|------------------|------|--------------------|
| 页 64: [925] 带格式的 | User | 2018/6/30 17:15:00 |
|------------------|------|--------------------|

定义网格后不调整右缩进, 不对齐到网格

|                  |      |                    |
|------------------|------|--------------------|
| 页 64: [926] 带格式的 | User | 2018/6/30 17:02:00 |
|------------------|------|--------------------|

无下划线, 字体颜色: 自动设置

|                  |      |                    |
|------------------|------|--------------------|
| 页 64: [927] 带格式的 | User | 2018/6/30 17:02:00 |
|------------------|------|--------------------|

无下划线, 字体颜色: 自动设置

|                  |      |                    |
|------------------|------|--------------------|
| 页 64: [928] 带格式的 | User | 2018/6/30 17:02:00 |
|------------------|------|--------------------|

无下划线, 字体颜色: 自动设置

|                  |      |                    |
|------------------|------|--------------------|
| 页 64: [929] 带格式的 | User | 2018/6/30 17:02:00 |
|------------------|------|--------------------|

无下划线, 字体颜色: 自动设置

|                  |      |                    |
|------------------|------|--------------------|
| 页 64: [930] 带格式的 | User | 2018/6/30 17:02:00 |
|------------------|------|--------------------|

无下划线, 字体颜色: 自动设置

|                  |      |                    |
|------------------|------|--------------------|
| 页 64: [931] 带格式的 | User | 2018/6/30 17:02:00 |
|------------------|------|--------------------|

无下划线, 字体颜色: 自动设置

|                  |      |                    |
|------------------|------|--------------------|
| 页 64: [932] 带格式的 | User | 2018/6/30 17:02:00 |
|------------------|------|--------------------|

无下划线, 字体颜色: 自动设置

|                  |      |                    |
|------------------|------|--------------------|
| 页 64: [933] 带格式的 | User | 2018/6/30 17:15:00 |
|------------------|------|--------------------|

定义网格后不调整右缩进, 不对齐到网格

|                  |      |                    |
|------------------|------|--------------------|
| 页 64: [934] 带格式的 | User | 2018/6/30 17:02:00 |
|------------------|------|--------------------|

无下划线, 字体颜色: 自动设置

|                  |      |                    |
|------------------|------|--------------------|
| 页 64: [935] 带格式的 | User | 2018/6/30 17:02:00 |
|------------------|------|--------------------|

无下划线, 字体颜色: 自动设置

|                  |      |                    |
|------------------|------|--------------------|
| 页 64: [936] 带格式的 | User | 2018/6/30 17:02:00 |
|------------------|------|--------------------|

无下划线, 字体颜色: 自动设置

|                  |      |                    |
|------------------|------|--------------------|
| 页 64: [937] 带格式的 | User | 2018/6/30 17:02:00 |
|------------------|------|--------------------|

无下划线, 字体颜色: 自动设置

|                  |      |                    |
|------------------|------|--------------------|
| 页 64: [938] 带格式的 | User | 2018/6/30 17:02:00 |
|------------------|------|--------------------|

无下划线, 字体颜色: 自动设置

|                  |      |                    |
|------------------|------|--------------------|
| 页 64: [939] 带格式的 | User | 2018/6/30 17:02:00 |
|------------------|------|--------------------|

无下划线, 字体颜色: 自动设置

|                  |      |                    |
|------------------|------|--------------------|
| 页 64: [940] 带格式的 | User | 2018/6/30 17:02:00 |
|------------------|------|--------------------|

无下划线, 字体颜色: 自动设置

|                  |      |                    |
|------------------|------|--------------------|
| 页 64: [941] 带格式的 | User | 2018/6/30 17:15:00 |
|------------------|------|--------------------|

定义网格后不调整右缩进, 不对齐到网格

|                  |      |                    |
|------------------|------|--------------------|
| 页 64: [942] 带格式的 | User | 2018/6/30 17:02:00 |
|------------------|------|--------------------|

无下划线, 字体颜色: 自动设置

|                  |      |                    |
|------------------|------|--------------------|
| 页 64: [943] 带格式的 | User | 2018/6/30 17:02:00 |
|------------------|------|--------------------|

无下划线, 字体颜色: 自动设置

|                  |      |                    |
|------------------|------|--------------------|
| 页 64: [944] 带格式的 | User | 2018/6/30 17:02:00 |
|------------------|------|--------------------|

无下划线, 字体颜色: 自动设置

|                  |      |                    |
|------------------|------|--------------------|
| 页 64: [945] 带格式的 | User | 2018/6/30 17:02:00 |
|------------------|------|--------------------|

无下划线, 字体颜色: 自动设置

|                  |      |                    |
|------------------|------|--------------------|
| 页 64: [946] 带格式的 | User | 2018/6/30 17:02:00 |
|------------------|------|--------------------|

无下划线, 字体颜色: 自动设置

|                  |      |                    |
|------------------|------|--------------------|
| 页 64: [947] 带格式的 | User | 2018/6/30 17:02:00 |
|------------------|------|--------------------|

无下划线, 字体颜色: 自动设置

|                  |      |                    |
|------------------|------|--------------------|
| 页 64: [948] 带格式的 | User | 2018/6/30 17:02:00 |
|------------------|------|--------------------|

无下划线, 字体颜色: 自动设置



|                  |      |                    |
|------------------|------|--------------------|
| 页 64: [949] 带格式的 | User | 2018/6/30 17:15:00 |
|------------------|------|--------------------|

定义网格后不调整右缩进, 不对齐到网格

|                  |      |                    |
|------------------|------|--------------------|
| 页 64: [950] 带格式的 | User | 2018/6/30 17:02:00 |
|------------------|------|--------------------|

无下划线, 字体颜色: 自动设置

|                  |      |                    |
|------------------|------|--------------------|
| 页 64: [951] 带格式的 | User | 2018/6/30 17:02:00 |
|------------------|------|--------------------|

无下划线, 字体颜色: 自动设置

|                  |      |                    |
|------------------|------|--------------------|
| 页 64: [952] 带格式的 | User | 2018/6/30 17:02:00 |
|------------------|------|--------------------|

无下划线, 字体颜色: 自动设置

|                  |      |                    |
|------------------|------|--------------------|
| 页 64: [953] 带格式的 | User | 2018/6/30 17:02:00 |
|------------------|------|--------------------|

无下划线, 字体颜色: 自动设置

|                  |      |                    |
|------------------|------|--------------------|
| 页 64: [954] 带格式的 | User | 2018/6/30 17:02:00 |
|------------------|------|--------------------|

无下划线, 字体颜色: 自动设置

|                  |      |                    |
|------------------|------|--------------------|
| 页 64: [955] 带格式的 | User | 2018/6/30 17:02:00 |
|------------------|------|--------------------|

无下划线, 字体颜色: 自动设置

|                  |      |                    |
|------------------|------|--------------------|
| 页 64: [956] 带格式的 | User | 2018/6/30 17:02:00 |
|------------------|------|--------------------|

无下划线, 字体颜色: 自动设置

|                  |      |                    |
|------------------|------|--------------------|
| 页 64: [957] 带格式的 | User | 2018/6/30 17:15:00 |
|------------------|------|--------------------|

定义网格后不调整右缩进, 不对齐到网格

|                  |      |                    |
|------------------|------|--------------------|
| 页 64: [958] 带格式的 | User | 2018/6/30 17:02:00 |
|------------------|------|--------------------|

无下划线, 字体颜色: 自动设置

|                  |      |                    |
|------------------|------|--------------------|
| 页 64: [959] 带格式的 | User | 2018/6/30 17:02:00 |
|------------------|------|--------------------|

无下划线, 字体颜色: 自动设置

|                  |      |                    |
|------------------|------|--------------------|
| 页 64: [960] 带格式的 | User | 2018/6/30 17:02:00 |
|------------------|------|--------------------|

无下划线, 字体颜色: 自动设置

|                  |      |                    |
|------------------|------|--------------------|
| 页 64: [961] 带格式的 | User | 2018/6/30 17:02:00 |
|------------------|------|--------------------|

无下划线, 字体颜色: 自动设置

|                  |      |                    |
|------------------|------|--------------------|
| 页 64: [962] 带格式的 | User | 2018/6/30 17:02:00 |
|------------------|------|--------------------|

无下划线, 字体颜色: 自动设置

|                  |      |                    |
|------------------|------|--------------------|
| 页 64: [963] 带格式的 | User | 2018/6/30 17:02:00 |
|------------------|------|--------------------|

无下划线, 字体颜色: 自动设置

|                  |      |                    |
|------------------|------|--------------------|
| 页 64: [964] 带格式的 | User | 2018/6/30 17:02:00 |
|------------------|------|--------------------|

无下划线, 字体颜色: 自动设置

|                  |      |                    |
|------------------|------|--------------------|
| 页 64: [965] 带格式的 | User | 2018/6/30 17:15:00 |
|------------------|------|--------------------|

定义网格后不调整右缩进, 不对齐到网格

|                  |      |                    |
|------------------|------|--------------------|
| 页 64: [966] 带格式的 | User | 2018/6/30 17:02:00 |
|------------------|------|--------------------|

无下划线, 字体颜色: 自动设置

|                  |      |                    |
|------------------|------|--------------------|
| 页 64: [967] 带格式的 | User | 2018/6/30 17:02:00 |
|------------------|------|--------------------|

无下划线, 字体颜色: 自动设置

|                  |      |                    |
|------------------|------|--------------------|
| 页 64: [968] 带格式的 | User | 2018/6/30 17:02:00 |
|------------------|------|--------------------|

无下划线, 字体颜色: 自动设置

|                  |      |                    |
|------------------|------|--------------------|
| 页 64: [969] 带格式的 | User | 2018/6/30 17:02:00 |
|------------------|------|--------------------|

无下划线, 字体颜色: 自动设置

|                  |      |                    |
|------------------|------|--------------------|
| 页 64: [970] 带格式的 | User | 2018/6/30 17:02:00 |
|------------------|------|--------------------|

无下划线, 字体颜色: 自动设置

|                  |      |                    |
|------------------|------|--------------------|
| 页 64: [971] 带格式的 | User | 2018/6/30 17:02:00 |
|------------------|------|--------------------|

无下划线, 字体颜色: 自动设置

|                  |      |                    |
|------------------|------|--------------------|
| 页 64: [972] 带格式的 | User | 2018/6/30 17:02:00 |
|------------------|------|--------------------|

无下划线, 字体颜色: 自动设置

|                  |      |                    |
|------------------|------|--------------------|
| 页 64: [973] 带格式的 | User | 2018/6/30 17:15:00 |
|------------------|------|--------------------|

定义网格后不调整右缩进, 不对齐到网格

|                  |      |                    |
|------------------|------|--------------------|
| 页 64: [974] 带格式的 | User | 2018/6/30 17:02:00 |
|------------------|------|--------------------|

无下划线, 字体颜色: 自动设置

|                  |      |                    |
|------------------|------|--------------------|
| 页 64: [975] 带格式的 | User | 2018/6/30 17:02:00 |
|------------------|------|--------------------|

无下划线, 字体颜色: 自动设置

|                  |      |                    |
|------------------|------|--------------------|
| 页 64: [976] 带格式的 | User | 2018/6/30 17:02:00 |
|------------------|------|--------------------|

无下划线, 字体颜色: 自动设置

|                  |      |                    |
|------------------|------|--------------------|
| 页 64: [977] 带格式的 | User | 2018/6/30 17:02:00 |
|------------------|------|--------------------|

无下划线, 字体颜色: 自动设置

|                  |      |                    |
|------------------|------|--------------------|
| 页 64: [978] 带格式的 | User | 2018/6/30 17:02:00 |
|------------------|------|--------------------|

无下划线, 字体颜色: 自动设置

|                  |      |                    |
|------------------|------|--------------------|
| 页 64: [979] 带格式的 | User | 2018/6/30 17:02:00 |
|------------------|------|--------------------|

无下划线, 字体颜色: 自动设置

|                  |      |                    |
|------------------|------|--------------------|
| 页 64: [980] 带格式的 | User | 2018/6/30 17:02:00 |
|------------------|------|--------------------|

无下划线, 字体颜色: 自动设置

|                  |      |                    |
|------------------|------|--------------------|
| 页 64: [981] 带格式的 | User | 2018/6/30 17:15:00 |
|------------------|------|--------------------|

定义网格后不调整右缩进, 不对齐到网格

|                  |      |                    |
|------------------|------|--------------------|
| 页 64: [982] 带格式的 | User | 2018/6/30 17:02:00 |
|------------------|------|--------------------|

无下划线, 字体颜色: 自动设置

|                  |      |                    |
|------------------|------|--------------------|
| 页 64: [983] 带格式的 | User | 2018/6/30 17:02:00 |
|------------------|------|--------------------|

无下划线, 字体颜色: 自动设置

|                  |      |                    |
|------------------|------|--------------------|
| 页 64: [984] 带格式的 | User | 2018/6/30 17:02:00 |
|------------------|------|--------------------|

无下划线, 字体颜色: 自动设置

|                  |      |                    |
|------------------|------|--------------------|
| 页 64: [985] 带格式的 | User | 2018/6/30 17:02:00 |
|------------------|------|--------------------|

无下划线, 字体颜色: 自动设置

|                  |      |                    |
|------------------|------|--------------------|
| 页 64: [986] 带格式的 | User | 2018/6/30 17:02:00 |
|------------------|------|--------------------|

无下划线, 字体颜色: 自动设置

|                  |      |                    |
|------------------|------|--------------------|
| 页 64: [987] 带格式的 | User | 2018/6/30 17:02:00 |
|------------------|------|--------------------|

无下划线, 字体颜色: 自动设置

|                  |      |                    |
|------------------|------|--------------------|
| 页 64: [988] 带格式的 | User | 2018/6/30 17:02:00 |
|------------------|------|--------------------|

无下划线, 字体颜色: 自动设置

|                  |      |                    |
|------------------|------|--------------------|
| 页 64: [989] 带格式的 | User | 2018/6/30 17:15:00 |
|------------------|------|--------------------|

定义网格后不调整右缩进, 不对齐到网格

|                  |      |                    |
|------------------|------|--------------------|
| 页 64: [990] 带格式的 | User | 2018/6/30 17:02:00 |
|------------------|------|--------------------|

无下划线, 字体颜色: 自动设置

|                  |      |                    |
|------------------|------|--------------------|
| 页 64: [991] 带格式的 | User | 2018/6/30 17:02:00 |
|------------------|------|--------------------|

无下划线, 字体颜色: 自动设置

|                  |      |                    |
|------------------|------|--------------------|
| 页 64: [992] 带格式的 | User | 2018/6/30 17:02:00 |
|------------------|------|--------------------|

无下划线, 字体颜色: 自动设置

|                  |      |                    |
|------------------|------|--------------------|
| 页 64: [993] 带格式的 | User | 2018/6/30 17:02:00 |
|------------------|------|--------------------|

无下划线, 字体颜色: 自动设置

|                  |      |                    |
|------------------|------|--------------------|
| 页 64: [994] 带格式的 | User | 2018/6/30 17:02:00 |
|------------------|------|--------------------|

无下划线, 字体颜色: 自动设置

|                  |      |                    |
|------------------|------|--------------------|
| 页 64: [995] 带格式的 | User | 2018/6/30 17:02:00 |
|------------------|------|--------------------|

无下划线, 字体颜色: 自动设置

|                  |      |                    |
|------------------|------|--------------------|
| 页 64: [996] 带格式的 | User | 2018/6/30 17:02:00 |
|------------------|------|--------------------|

无下划线, 字体颜色: 自动设置

|                  |      |                    |
|------------------|------|--------------------|
| 页 64: [997] 带格式的 | User | 2018/6/30 17:15:00 |
|------------------|------|--------------------|

定义网格后不调整右缩进, 不对齐到网格

|                  |      |                    |
|------------------|------|--------------------|
| 页 64: [998] 带格式的 | User | 2018/6/30 17:02:00 |
|------------------|------|--------------------|

无下划线, 字体颜色: 自动设置

|                  |      |                    |
|------------------|------|--------------------|
| 页 64: [999] 带格式的 | User | 2018/6/30 17:02:00 |
|------------------|------|--------------------|

无下划线, 字体颜色: 自动设置

|                   |      |                    |
|-------------------|------|--------------------|
| 页 64: [1000] 带格式的 | User | 2018/6/30 17:02:00 |
|-------------------|------|--------------------|

无下划线, 字体颜色: 自动设置

|                   |      |                    |
|-------------------|------|--------------------|
| 页 64: [1001] 带格式的 | User | 2018/6/30 17:02:00 |
|-------------------|------|--------------------|

无下划线, 字体颜色: 自动设置

|                   |      |                    |
|-------------------|------|--------------------|
| 页 64: [1002] 带格式的 | User | 2018/6/30 17:02:00 |
|-------------------|------|--------------------|

无下划线, 字体颜色: 自动设置

|                   |      |                    |
|-------------------|------|--------------------|
| 页 64: [1003] 带格式的 | User | 2018/6/30 17:02:00 |
|-------------------|------|--------------------|

无下划线, 字体颜色: 自动设置

|                   |      |                    |
|-------------------|------|--------------------|
| 页 64: [1004] 带格式的 | User | 2018/6/30 17:02:00 |
|-------------------|------|--------------------|

无下划线, 字体颜色: 自动设置

|                   |      |                    |
|-------------------|------|--------------------|
| 页 64: [1005] 带格式的 | User | 2018/6/30 17:15:00 |
|-------------------|------|--------------------|

定义网格后不调整右缩进, 不对齐到网格

|                   |      |                    |
|-------------------|------|--------------------|
| 页 64: [1006] 带格式的 | User | 2018/6/30 17:02:00 |
|-------------------|------|--------------------|

无下划线, 字体颜色: 自动设置

|                   |      |                    |
|-------------------|------|--------------------|
| 页 64: [1007] 带格式的 | User | 2018/6/30 17:02:00 |
|-------------------|------|--------------------|

无下划线, 字体颜色: 自动设置

|                   |      |                    |
|-------------------|------|--------------------|
| 页 64: [1008] 带格式的 | User | 2018/6/30 17:02:00 |
|-------------------|------|--------------------|

无下划线, 字体颜色: 自动设置

|                   |      |                    |
|-------------------|------|--------------------|
| 页 64: [1009] 带格式的 | User | 2018/6/30 17:02:00 |
|-------------------|------|--------------------|

无下划线, 字体颜色: 自动设置

|                   |      |                    |
|-------------------|------|--------------------|
| 页 64: [1010] 带格式的 | User | 2018/6/30 17:02:00 |
|-------------------|------|--------------------|

无下划线, 字体颜色: 自动设置

|                   |      |                    |
|-------------------|------|--------------------|
| 页 64: [1011] 带格式的 | User | 2018/6/30 17:02:00 |
|-------------------|------|--------------------|

无下划线, 字体颜色: 自动设置

|                   |      |                    |
|-------------------|------|--------------------|
| 页 65: [1012] 带格式的 | User | 2018/6/30 17:02:00 |
|-------------------|------|--------------------|

无下划线, 字体颜色: 自动设置

|                   |      |                    |
|-------------------|------|--------------------|
| 页 65: [1013] 带格式的 | User | 2018/6/30 17:02:00 |
|-------------------|------|--------------------|

无下划线, 字体颜色: 自动设置

|                   |      |                    |
|-------------------|------|--------------------|
| 页 65: [1014] 带格式的 | User | 2018/6/30 17:15:00 |
|-------------------|------|--------------------|

定义网格后不调整右缩进, 不对齐到网格

|                   |      |                    |
|-------------------|------|--------------------|
| 页 65: [1015] 带格式的 | User | 2018/6/30 17:02:00 |
|-------------------|------|--------------------|

无下划线, 字体颜色: 自动设置

|                   |      |                    |
|-------------------|------|--------------------|
| 页 65: [1015] 带格式的 | User | 2018/6/30 17:02:00 |
|-------------------|------|--------------------|

无下划线, 字体颜色: 自动设置

|                   |      |                    |
|-------------------|------|--------------------|
| 页 65: [1016] 带格式的 | User | 2018/6/30 17:02:00 |
|-------------------|------|--------------------|

无下划线, 字体颜色: 自动设置

|                   |      |                    |
|-------------------|------|--------------------|
| 页 65: [1016] 带格式的 | User | 2018/6/30 17:02:00 |
|-------------------|------|--------------------|

无下划线, 字体颜色: 自动设置

|                   |      |                    |
|-------------------|------|--------------------|
| 页 65: [1017] 带格式的 | User | 2018/6/30 17:02:00 |
|-------------------|------|--------------------|

无下划线, 字体颜色: 自动设置

|                   |      |                    |
|-------------------|------|--------------------|
| 页 65: [1017] 带格式的 | User | 2018/6/30 17:02:00 |
|-------------------|------|--------------------|

无下划线, 字体颜色: 自动设置

|                   |      |                    |
|-------------------|------|--------------------|
| 页 65: [1018] 带格式的 | User | 2018/6/30 17:02:00 |
|-------------------|------|--------------------|

无下划线, 字体颜色: 自动设置

|                   |      |                    |
|-------------------|------|--------------------|
| 页 65: [1018] 带格式的 | User | 2018/6/30 17:02:00 |
|-------------------|------|--------------------|

无下划线, 字体颜色: 自动设置

|                   |      |                    |
|-------------------|------|--------------------|
| 页 65: [1019] 带格式的 | User | 2018/6/30 17:02:00 |
|-------------------|------|--------------------|

无下划线, 字体颜色: 自动设置

|                   |      |                    |
|-------------------|------|--------------------|
| 页 65: [1019] 带格式的 | User | 2018/6/30 17:02:00 |
|-------------------|------|--------------------|

无下划线, 字体颜色: 自动设置

|                   |      |                    |
|-------------------|------|--------------------|
| 页 65: [1020] 带格式的 | User | 2018/6/30 17:02:00 |
|-------------------|------|--------------------|

无下划线, 字体颜色: 自动设置

|                   |      |                    |
|-------------------|------|--------------------|
| 页 65: [1020] 带格式的 | User | 2018/6/30 17:02:00 |
|-------------------|------|--------------------|

无下划线, 字体颜色: 自动设置

|                   |      |                    |
|-------------------|------|--------------------|
| 页 65: [1021] 带格式的 | User | 2018/6/30 17:02:00 |
|-------------------|------|--------------------|

无下划线, 字体颜色: 自动设置

|                   |      |                    |
|-------------------|------|--------------------|
| 页 65: [1021] 带格式的 | User | 2018/6/30 17:02:00 |
|-------------------|------|--------------------|

无下划线, 字体颜色: 自动设置

|                   |      |                    |
|-------------------|------|--------------------|
| 页 65: [1022] 带格式的 | User | 2018/6/30 17:02:00 |
|-------------------|------|--------------------|

无下划线, 字体颜色: 自动设置

|                   |      |                    |
|-------------------|------|--------------------|
| 页 65: [1022] 带格式的 | User | 2018/6/30 17:02:00 |
|-------------------|------|--------------------|

无下划线, 字体颜色: 自动设置

|                   |      |                    |
|-------------------|------|--------------------|
| 页 65: [1023] 带格式的 | User | 2018/6/30 17:02:00 |
|-------------------|------|--------------------|

无下划线, 字体颜色: 自动设置

|                   |      |                    |
|-------------------|------|--------------------|
| 页 65: [1023] 带格式的 | User | 2018/6/30 17:02:00 |
|-------------------|------|--------------------|

无下划线, 字体颜色: 自动设置

|                   |      |                    |
|-------------------|------|--------------------|
| 页 65: [1024] 带格式的 | User | 2018/6/30 17:02:00 |
|-------------------|------|--------------------|

无下划线, 字体颜色: 自动设置

|                   |      |                    |
|-------------------|------|--------------------|
| 页 65: [1024] 带格式的 | User | 2018/6/30 17:02:00 |
|-------------------|------|--------------------|

无下划线, 字体颜色: 自动设置

|                   |      |                    |
|-------------------|------|--------------------|
| 页 65: [1025] 带格式的 | User | 2018/6/30 17:02:00 |
|-------------------|------|--------------------|

无下划线, 字体颜色: 自动设置

|                   |      |                    |
|-------------------|------|--------------------|
| 页 65: [1025] 带格式的 | User | 2018/6/30 17:02:00 |
|-------------------|------|--------------------|

无下划线, 字体颜色: 自动设置

|                   |      |                    |
|-------------------|------|--------------------|
| 页 65: [1026] 带格式的 | User | 2018/6/30 17:02:00 |
|-------------------|------|--------------------|

无下划线, 字体颜色: 自动设置

|                   |      |                    |
|-------------------|------|--------------------|
| 页 65: [1026] 带格式的 | User | 2018/6/30 17:02:00 |
|-------------------|------|--------------------|

无下划线, 字体颜色: 自动设置

|                   |      |                    |
|-------------------|------|--------------------|
| 页 65: [1027] 带格式的 | User | 2018/6/30 17:02:00 |
|-------------------|------|--------------------|

无下划线, 字体颜色: 自动设置

|                   |      |                    |
|-------------------|------|--------------------|
| 页 65: [1027] 带格式的 | User | 2018/6/30 17:02:00 |
|-------------------|------|--------------------|

无下划线, 字体颜色: 自动设置

|                   |      |                    |
|-------------------|------|--------------------|
| 页 65: [1028] 带格式的 | User | 2018/6/30 17:02:00 |
|-------------------|------|--------------------|

无下划线, 字体颜色: 自动设置

|                   |      |                    |
|-------------------|------|--------------------|
| 页 65: [1028] 带格式的 | User | 2018/6/30 17:02:00 |
|-------------------|------|--------------------|

无下划线, 字体颜色: 自动设置

|                   |      |                    |
|-------------------|------|--------------------|
| 页 65: [1029] 带格式的 | User | 2018/6/30 17:02:00 |
|-------------------|------|--------------------|

无下划线, 字体颜色: 自动设置

|                   |      |                    |
|-------------------|------|--------------------|
| 页 65: [1029] 带格式的 | User | 2018/6/30 17:02:00 |
|-------------------|------|--------------------|

无下划线, 字体颜色: 自动设置

|                   |      |                    |
|-------------------|------|--------------------|
| 页 65: [1030] 带格式的 | User | 2018/6/30 17:02:00 |
|-------------------|------|--------------------|

无下划线, 字体颜色: 自动设置

|                   |      |                    |
|-------------------|------|--------------------|
| 页 65: [1030] 带格式的 | User | 2018/6/30 17:02:00 |
|-------------------|------|--------------------|

无下划线, 字体颜色: 自动设置

|                   |      |                    |
|-------------------|------|--------------------|
| 页 65: [1031] 带格式的 | User | 2018/6/30 17:02:00 |
|-------------------|------|--------------------|

无下划线, 字体颜色: 自动设置

|                   |      |                    |
|-------------------|------|--------------------|
| 页 65: [1032] 带格式的 | User | 2018/6/30 17:15:00 |
|-------------------|------|--------------------|

定义网格后不调整右缩进, 不对齐到网格

|                   |      |                    |
|-------------------|------|--------------------|
| 页 65: [1033] 带格式的 | User | 2018/6/30 17:02:00 |
|-------------------|------|--------------------|

无下划线, 字体颜色: 自动设置

|                   |      |                    |
|-------------------|------|--------------------|
| 页 65: [1033] 带格式的 | User | 2018/6/30 17:02:00 |
|-------------------|------|--------------------|

无下划线, 字体颜色: 自动设置

|                   |      |                    |
|-------------------|------|--------------------|
| 页 65: [1034] 带格式的 | User | 2018/6/30 17:02:00 |
|-------------------|------|--------------------|

无下划线, 字体颜色: 自动设置

|                   |      |                    |
|-------------------|------|--------------------|
| 页 65: [1034] 带格式的 | User | 2018/6/30 17:02:00 |
|-------------------|------|--------------------|

无下划线, 字体颜色: 自动设置

|                   |      |                    |
|-------------------|------|--------------------|
| 页 65: [1035] 带格式的 | User | 2018/6/30 17:02:00 |
|-------------------|------|--------------------|

无下划线, 字体颜色: 自动设置

|                   |      |                    |
|-------------------|------|--------------------|
| 页 65: [1035] 带格式的 | User | 2018/6/30 17:02:00 |
|-------------------|------|--------------------|

无下划线, 字体颜色: 自动设置

|                   |      |                    |
|-------------------|------|--------------------|
| 页 65: [1036] 带格式的 | User | 2018/6/30 17:02:00 |
|-------------------|------|--------------------|



无下划线, 字体颜色: 自动设置

|                   |      |                    |
|-------------------|------|--------------------|
| 页 65: [1036] 带格式的 | User | 2018/6/30 17:02:00 |
|-------------------|------|--------------------|

无下划线, 字体颜色: 自动设置

|                   |      |                    |
|-------------------|------|--------------------|
| 页 65: [1037] 带格式的 | User | 2018/6/30 17:02:00 |
|-------------------|------|--------------------|

无下划线, 字体颜色: 自动设置

|                   |      |                    |
|-------------------|------|--------------------|
| 页 65: [1037] 带格式的 | User | 2018/6/30 17:02:00 |
|-------------------|------|--------------------|

无下划线, 字体颜色: 自动设置

|                   |      |                    |
|-------------------|------|--------------------|
| 页 65: [1038] 带格式的 | User | 2018/6/30 17:02:00 |
|-------------------|------|--------------------|

无下划线, 字体颜色: 自动设置

|                   |      |                    |
|-------------------|------|--------------------|
| 页 65: [1038] 带格式的 | User | 2018/6/30 17:02:00 |
|-------------------|------|--------------------|

无下划线, 字体颜色: 自动设置

|                   |      |                    |
|-------------------|------|--------------------|
| 页 65: [1039] 带格式的 | User | 2018/6/30 17:02:00 |
|-------------------|------|--------------------|

无下划线, 字体颜色: 自动设置

|                   |      |                    |
|-------------------|------|--------------------|
| 页 65: [1039] 带格式的 | User | 2018/6/30 17:02:00 |
|-------------------|------|--------------------|

无下划线, 字体颜色: 自动设置

|                   |      |                    |
|-------------------|------|--------------------|
| 页 65: [1040] 带格式的 | User | 2018/6/30 17:02:00 |
|-------------------|------|--------------------|

无下划线, 字体颜色: 自动设置

|                   |      |                    |
|-------------------|------|--------------------|
| 页 65: [1040] 带格式的 | User | 2018/6/30 17:02:00 |
|-------------------|------|--------------------|

无下划线, 字体颜色: 自动设置

|                   |      |                    |
|-------------------|------|--------------------|
| 页 65: [1041] 带格式的 | User | 2018/6/30 17:02:00 |
|-------------------|------|--------------------|

无下划线, 字体颜色: 自动设置

|                   |      |                    |
|-------------------|------|--------------------|
| 页 65: [1042] 带格式的 | User | 2018/6/30 17:15:00 |
|-------------------|------|--------------------|

定义网格后不调整右缩进, 不对齐到网格

|                   |      |                    |
|-------------------|------|--------------------|
| 页 65: [1043] 带格式的 | User | 2018/6/30 17:02:00 |
|-------------------|------|--------------------|

无下划线, 字体颜色: 自动设置

|                   |      |                    |
|-------------------|------|--------------------|
| 页 65: [1043] 带格式的 | User | 2018/6/30 17:02:00 |
|-------------------|------|--------------------|

无下划线, 字体颜色: 自动设置

|                   |      |                    |
|-------------------|------|--------------------|
| 页 65: [1044] 带格式的 | User | 2018/6/30 17:02:00 |
|-------------------|------|--------------------|

无下划线, 字体颜色: 自动设置

|                   |      |                    |
|-------------------|------|--------------------|
| 页 65: [1044] 带格式的 | User | 2018/6/30 17:02:00 |
|-------------------|------|--------------------|

无下划线, 字体颜色: 自动设置

|                   |      |                    |
|-------------------|------|--------------------|
| 页 65: [1045] 带格式的 | User | 2018/6/30 17:02:00 |
|-------------------|------|--------------------|

无下划线, 字体颜色: 自动设置

|                   |      |                    |
|-------------------|------|--------------------|
| 页 65: [1045] 带格式的 | User | 2018/6/30 17:02:00 |
|-------------------|------|--------------------|

无下划线, 字体颜色: 自动设置

|                   |      |                    |
|-------------------|------|--------------------|
| 页 65: [1046] 带格式的 | User | 2018/6/30 17:02:00 |
|-------------------|------|--------------------|

无下划线, 字体颜色: 自动设置

|                   |      |                    |
|-------------------|------|--------------------|
| 页 65: [1046] 带格式的 | User | 2018/6/30 17:02:00 |
|-------------------|------|--------------------|

无下划线, 字体颜色: 自动设置

|                   |      |                    |
|-------------------|------|--------------------|
| 页 65: [1047] 带格式的 | User | 2018/6/30 17:02:00 |
|-------------------|------|--------------------|

无下划线, 字体颜色: 自动设置

|                   |      |                    |
|-------------------|------|--------------------|
| 页 65: [1047] 带格式的 | User | 2018/6/30 17:02:00 |
|-------------------|------|--------------------|

无下划线, 字体颜色: 自动设置

|                   |      |                    |
|-------------------|------|--------------------|
| 页 65: [1048] 带格式的 | User | 2018/6/30 17:02:00 |
|-------------------|------|--------------------|

无下划线, 字体颜色: 自动设置

|                   |      |                    |
|-------------------|------|--------------------|
| 页 65: [1048] 带格式的 | User | 2018/6/30 17:02:00 |
|-------------------|------|--------------------|

无下划线, 字体颜色: 自动设置

|                   |      |                    |
|-------------------|------|--------------------|
| 页 65: [1049] 带格式的 | User | 2018/6/30 17:02:00 |
|-------------------|------|--------------------|

无下划线, 字体颜色: 自动设置

|                   |      |                    |
|-------------------|------|--------------------|
| 页 65: [1049] 带格式的 | User | 2018/6/30 17:02:00 |
|-------------------|------|--------------------|

无下划线, 字体颜色: 自动设置

|                   |      |                    |
|-------------------|------|--------------------|
| 页 65: [1050] 带格式的 | User | 2018/6/30 17:02:00 |
|-------------------|------|--------------------|

无下划线, 字体颜色: 自动设置

|                   |      |                    |
|-------------------|------|--------------------|
| 页 65: [1050] 带格式的 | User | 2018/6/30 17:02:00 |
|-------------------|------|--------------------|

无下划线, 字体颜色: 自动设置

|                   |      |                    |
|-------------------|------|--------------------|
| 页 65: [1051] 带格式的 | User | 2018/6/30 17:02:00 |
|-------------------|------|--------------------|

无下划线, 字体颜色: 自动设置

|                   |      |                    |
|-------------------|------|--------------------|
| 页 65: [1052] 带格式的 | User | 2018/6/30 17:02:00 |
|-------------------|------|--------------------|

无下划线, 字体颜色: 自动设置

|                   |      |                    |
|-------------------|------|--------------------|
| 页 65: [1053] 带格式的 | User | 2018/6/30 17:15:00 |
|-------------------|------|--------------------|

定义网格后不调整右缩进, 不对齐到网格

|                   |      |                    |
|-------------------|------|--------------------|
| 页 65: [1054] 带格式的 | User | 2018/6/30 17:02:00 |
|-------------------|------|--------------------|

无下划线, 字体颜色: 自动设置

|                   |      |                    |
|-------------------|------|--------------------|
| 页 65: [1054] 带格式的 | User | 2018/6/30 17:02:00 |
|-------------------|------|--------------------|

无下划线, 字体颜色: 自动设置

|                   |      |                    |
|-------------------|------|--------------------|
| 页 65: [1055] 带格式的 | User | 2018/6/30 17:02:00 |
|-------------------|------|--------------------|

无下划线, 字体颜色: 自动设置

|                   |      |                    |
|-------------------|------|--------------------|
| 页 65: [1055] 带格式的 | User | 2018/6/30 17:02:00 |
|-------------------|------|--------------------|

无下划线, 字体颜色: 自动设置

|                   |      |                    |
|-------------------|------|--------------------|
| 页 65: [1056] 带格式的 | User | 2018/6/30 17:02:00 |
|-------------------|------|--------------------|

无下划线, 字体颜色: 自动设置

|                   |      |                    |
|-------------------|------|--------------------|
| 页 65: [1057] 带格式的 | User | 2018/6/30 17:15:00 |
|-------------------|------|--------------------|

定义网格后不调整右缩进, 不对齐到网格

|                   |      |                    |
|-------------------|------|--------------------|
| 页 65: [1058] 带格式的 | User | 2018/6/30 17:02:00 |
|-------------------|------|--------------------|

无下划线, 字体颜色: 自动设置

|                   |      |                    |
|-------------------|------|--------------------|
| 页 65: [1058] 带格式的 | User | 2018/6/30 17:02:00 |
|-------------------|------|--------------------|

无下划线, 字体颜色: 自动设置

|                   |      |                    |
|-------------------|------|--------------------|
| 页 65: [1059] 带格式的 | User | 2018/6/30 17:02:00 |
|-------------------|------|--------------------|

无下划线, 字体颜色: 自动设置

|                   |      |                    |
|-------------------|------|--------------------|
| 页 65: [1059] 带格式的 | User | 2018/6/30 17:02:00 |
|-------------------|------|--------------------|

无下划线, 字体颜色: 自动设置

|                   |      |                    |
|-------------------|------|--------------------|
| 页 65: [1060] 带格式的 | User | 2018/6/30 17:02:00 |
|-------------------|------|--------------------|

无下划线, 字体颜色: 自动设置

|                   |      |                    |
|-------------------|------|--------------------|
| 页 65: [1060] 带格式的 | User | 2018/6/30 17:02:00 |
|-------------------|------|--------------------|

无下划线, 字体颜色: 自动设置

|                   |      |                    |
|-------------------|------|--------------------|
| 页 65: [1061] 带格式的 | User | 2018/6/30 17:02:00 |
|-------------------|------|--------------------|

无下划线, 字体颜色: 自动设置

|                   |      |                    |
|-------------------|------|--------------------|
| 页 65: [1061] 带格式的 | User | 2018/6/30 17:02:00 |
|-------------------|------|--------------------|

无下划线, 字体颜色: 自动设置

|                   |      |                    |
|-------------------|------|--------------------|
| 页 65: [1062] 带格式的 | User | 2018/6/30 17:02:00 |
|-------------------|------|--------------------|

无下划线, 字体颜色: 自动设置

|                   |      |                    |
|-------------------|------|--------------------|
| 页 65: [1062] 带格式的 | User | 2018/6/30 17:02:00 |
|-------------------|------|--------------------|

无下划线, 字体颜色: 自动设置

|                   |      |                    |
|-------------------|------|--------------------|
| 页 65: [1063] 带格式的 | User | 2018/6/30 17:02:00 |
|-------------------|------|--------------------|

无下划线, 字体颜色: 自动设置

|                   |      |                    |
|-------------------|------|--------------------|
| 页 65: [1063] 带格式的 | User | 2018/6/30 17:02:00 |
|-------------------|------|--------------------|

无下划线, 字体颜色: 自动设置

|                   |      |                    |
|-------------------|------|--------------------|
| 页 65: [1064] 带格式的 | User | 2018/6/30 17:02:00 |
|-------------------|------|--------------------|

无下划线, 字体颜色: 自动设置

|                   |      |                    |
|-------------------|------|--------------------|
| 页 65: [1064] 带格式的 | User | 2018/6/30 17:02:00 |
|-------------------|------|--------------------|

无下划线, 字体颜色: 自动设置

|                   |      |                    |
|-------------------|------|--------------------|
| 页 65: [1065] 带格式的 | User | 2018/6/30 17:02:00 |
|-------------------|------|--------------------|

无下划线, 字体颜色: 自动设置

|                   |      |                    |
|-------------------|------|--------------------|
| 页 65: [1065] 带格式的 | User | 2018/6/30 17:02:00 |
|-------------------|------|--------------------|

无下划线, 字体颜色: 自动设置

|                   |      |                    |
|-------------------|------|--------------------|
| 页 65: [1066] 带格式的 | User | 2018/6/30 17:02:00 |
|-------------------|------|--------------------|

无下划线, 字体颜色: 自动设置

|                   |      |                    |
|-------------------|------|--------------------|
| 页 65: [1066] 带格式的 | User | 2018/6/30 17:02:00 |
| 无下划线, 字体颜色: 自动设置  |      |                    |
| 页 65: [1067] 带格式的 | User | 2018/6/30 17:02:00 |
| 无下划线, 字体颜色: 自动设置  |      |                    |
| 页 65: [1067] 带格式的 | User | 2018/6/30 17:02:00 |
| 无下划线, 字体颜色: 自动设置  |      |                    |
| 页 65: [1068] 带格式的 | User | 2018/6/30 17:02:00 |
| 无下划线, 字体颜色: 自动设置  |      |                    |
| 页 65: [1068] 带格式的 | User | 2018/6/30 17:02:00 |
| 无下划线, 字体颜色: 自动设置  |      |                    |
| 页 65: [1069] 带格式的 | User | 2018/6/30 17:02:00 |
| 无下划线, 字体颜色: 自动设置  |      |                    |
| 页 65: [1069] 带格式的 | User | 2018/6/30 17:02:00 |
| 无下划线, 字体颜色: 自动设置  |      |                    |
| 页 65: [1070] 带格式的 | User | 2018/6/30 17:02:00 |
| 无下划线, 字体颜色: 自动设置  |      |                    |
| 页 65: [1070] 带格式的 | User | 2018/6/30 17:02:00 |
| 无下划线, 字体颜色: 自动设置  |      |                    |
| 页 65: [1071] 带格式的 | User | 2018/6/30 17:02:00 |
| 无下划线, 字体颜色: 自动设置  |      |                    |
| 页 65: [1071] 带格式的 | User | 2018/6/30 17:02:00 |
| 无下划线, 字体颜色: 自动设置  |      |                    |
| 页 65: [1072] 带格式的 | User | 2018/6/30 17:02:00 |
| 无下划线, 字体颜色: 自动设置  |      |                    |
| 页 65: [1072] 带格式的 | User | 2018/6/30 17:02:00 |
| 无下划线, 字体颜色: 自动设置  |      |                    |

|                   |      |                    |
|-------------------|------|--------------------|
| 页 65: [1073] 带格式的 | User | 2018/6/30 17:02:00 |
|-------------------|------|--------------------|

无下划线, 字体颜色: 自动设置

|                   |      |                    |
|-------------------|------|--------------------|
| 页 65: [1073] 带格式的 | User | 2018/6/30 17:02:00 |
|-------------------|------|--------------------|

无下划线, 字体颜色: 自动设置

|                   |      |                    |
|-------------------|------|--------------------|
| 页 65: [1074] 带格式的 | User | 2018/6/30 17:02:00 |
|-------------------|------|--------------------|

无下划线, 字体颜色: 自动设置

|                   |      |                    |
|-------------------|------|--------------------|
| 页 65: [1074] 带格式的 | User | 2018/6/30 17:02:00 |
|-------------------|------|--------------------|

无下划线, 字体颜色: 自动设置

|                   |      |                    |
|-------------------|------|--------------------|
| 页 65: [1075] 带格式的 | User | 2018/6/30 17:02:00 |
|-------------------|------|--------------------|

无下划线, 字体颜色: 自动设置

|                   |      |                    |
|-------------------|------|--------------------|
| 页 65: [1075] 带格式的 | User | 2018/6/30 17:02:00 |
|-------------------|------|--------------------|

无下划线, 字体颜色: 自动设置

|                   |      |                    |
|-------------------|------|--------------------|
| 页 65: [1076] 带格式的 | User | 2018/6/30 17:02:00 |
|-------------------|------|--------------------|

无下划线, 字体颜色: 自动设置

|                   |      |                    |
|-------------------|------|--------------------|
| 页 65: [1076] 带格式的 | User | 2018/6/30 17:02:00 |
|-------------------|------|--------------------|

无下划线, 字体颜色: 自动设置

|                   |      |                    |
|-------------------|------|--------------------|
| 页 65: [1077] 带格式的 | User | 2018/6/30 17:02:00 |
|-------------------|------|--------------------|

无下划线, 字体颜色: 自动设置

|                   |      |                    |
|-------------------|------|--------------------|
| 页 65: [1077] 带格式的 | User | 2018/6/30 17:02:00 |
|-------------------|------|--------------------|

无下划线, 字体颜色: 自动设置

|                   |      |                    |
|-------------------|------|--------------------|
| 页 65: [1078] 带格式的 | User | 2018/6/30 17:02:00 |
|-------------------|------|--------------------|

无下划线, 字体颜色: 自动设置

|                   |      |                    |
|-------------------|------|--------------------|
| 页 65: [1078] 带格式的 | User | 2018/6/30 17:02:00 |
|-------------------|------|--------------------|

无下划线, 字体颜色: 自动设置

|                   |      |                    |
|-------------------|------|--------------------|
| 页 65: [1079] 带格式的 | User | 2018/6/30 17:02:00 |
|-------------------|------|--------------------|

无下划线, 字体颜色: 自动设置

|                   |      |                    |
|-------------------|------|--------------------|
| 页 65: [1079] 带格式的 | User | 2018/6/30 17:02:00 |
|-------------------|------|--------------------|

无下划线, 字体颜色: 自动设置

|                   |      |                    |
|-------------------|------|--------------------|
| 页 65: [1080] 带格式的 | User | 2018/6/30 17:02:00 |
|-------------------|------|--------------------|

无下划线, 字体颜色: 自动设置

|                   |      |                    |
|-------------------|------|--------------------|
| 页 65: [1080] 带格式的 | User | 2018/6/30 17:02:00 |
|-------------------|------|--------------------|

无下划线, 字体颜色: 自动设置

|                   |      |                    |
|-------------------|------|--------------------|
| 页 65: [1081] 带格式的 | User | 2018/6/30 17:02:00 |
|-------------------|------|--------------------|

无下划线, 字体颜色: 自动设置

|                   |      |                    |
|-------------------|------|--------------------|
| 页 65: [1081] 带格式的 | User | 2018/6/30 17:02:00 |
|-------------------|------|--------------------|

无下划线, 字体颜色: 自动设置

|                   |      |                    |
|-------------------|------|--------------------|
| 页 65: [1082] 带格式的 | User | 2018/6/30 17:02:00 |
|-------------------|------|--------------------|

无下划线, 字体颜色: 自动设置

|                   |      |                    |
|-------------------|------|--------------------|
| 页 65: [1082] 带格式的 | User | 2018/6/30 17:02:00 |
|-------------------|------|--------------------|

无下划线, 字体颜色: 自动设置

|                   |      |                    |
|-------------------|------|--------------------|
| 页 65: [1083] 带格式的 | User | 2018/6/30 17:02:00 |
|-------------------|------|--------------------|

无下划线, 字体颜色: 自动设置

|                   |      |                    |
|-------------------|------|--------------------|
| 页 65: [1083] 带格式的 | User | 2018/6/30 17:02:00 |
|-------------------|------|--------------------|

无下划线, 字体颜色: 自动设置

|                   |      |                    |
|-------------------|------|--------------------|
| 页 65: [1084] 带格式的 | User | 2018/6/30 17:02:00 |
|-------------------|------|--------------------|

无下划线, 字体颜色: 自动设置

|                   |      |                    |
|-------------------|------|--------------------|
| 页 65: [1084] 带格式的 | User | 2018/6/30 17:02:00 |
|-------------------|------|--------------------|

无下划线, 字体颜色: 自动设置

|                   |      |                    |
|-------------------|------|--------------------|
| 页 65: [1085] 带格式的 | User | 2018/6/30 17:02:00 |
|-------------------|------|--------------------|

无下划线, 字体颜色: 自动设置

|                   |      |                    |
|-------------------|------|--------------------|
| 页 65: [1085] 带格式的 | User | 2018/6/30 17:02:00 |
|-------------------|------|--------------------|

无下划线, 字体颜色: 自动设置

|                   |      |                    |
|-------------------|------|--------------------|
| 页 65: [1086] 带格式的 | User | 2018/6/30 17:02:00 |
|-------------------|------|--------------------|

无下划线, 字体颜色: 自动设置

|                   |      |                    |
|-------------------|------|--------------------|
| 页 65: [1086] 带格式的 | User | 2018/6/30 17:02:00 |
|-------------------|------|--------------------|

无下划线, 字体颜色: 自动设置

|                   |      |                    |
|-------------------|------|--------------------|
| 页 65: [1087] 带格式的 | User | 2018/6/30 17:02:00 |
|-------------------|------|--------------------|

无下划线, 字体颜色: 自动设置

|                   |      |                    |
|-------------------|------|--------------------|
| 页 65: [1087] 带格式的 | User | 2018/6/30 17:02:00 |
|-------------------|------|--------------------|

无下划线, 字体颜色: 自动设置

|                   |      |                    |
|-------------------|------|--------------------|
| 页 65: [1088] 带格式的 | User | 2018/6/30 17:02:00 |
|-------------------|------|--------------------|

无下划线, 字体颜色: 自动设置

|                   |      |                    |
|-------------------|------|--------------------|
| 页 65: [1088] 带格式的 | User | 2018/6/30 17:02:00 |
|-------------------|------|--------------------|

无下划线, 字体颜色: 自动设置

|                   |      |                    |
|-------------------|------|--------------------|
| 页 65: [1089] 带格式的 | User | 2018/6/30 17:02:00 |
|-------------------|------|--------------------|

无下划线, 字体颜色: 自动设置

|                   |      |                    |
|-------------------|------|--------------------|
| 页 65: [1089] 带格式的 | User | 2018/6/30 17:02:00 |
|-------------------|------|--------------------|

无下划线, 字体颜色: 自动设置
